# Supplementary material for: Stereodivergent synthesis of vicinal quaternary-quaternary stereocenters and bioactive hyperolactones
Source: PubMed Central journal article supplement (PMC5958103; doi:10.1038/s41467-018-04123-w), 2018-05-17
Supplement: 41467_2018_4123_MOESM1_ESM.pdf [file 41467_2018_4123_MOESM1_ESM.pdf]

# **Stereodivergent Synthesis of Vicinal Quaternary-Quaternary Stereocenters and Bioactive Hyperolactones**

Haifeng Zheng,<sup>1</sup> Yan Wang,<sup>1</sup> Chaoran Xu,<sup>1</sup> Xi Xu,<sup>1</sup> Lili Lin,<sup>1</sup> Xiaohua Liu,<sup>1,\*</sup> and Xiaoming Feng<sup>1,2,\*</sup>

<sup>1</sup>Key Laboratory of Green Chemistry & Technology, Ministry of Education, College of Chemistry, Sichuan University, Chengdu 610064, China.

<sup>2</sup>Collaborative Innovation Center of Chemical Science and Engineering (Tianjin), China.

## Supplementary Figures

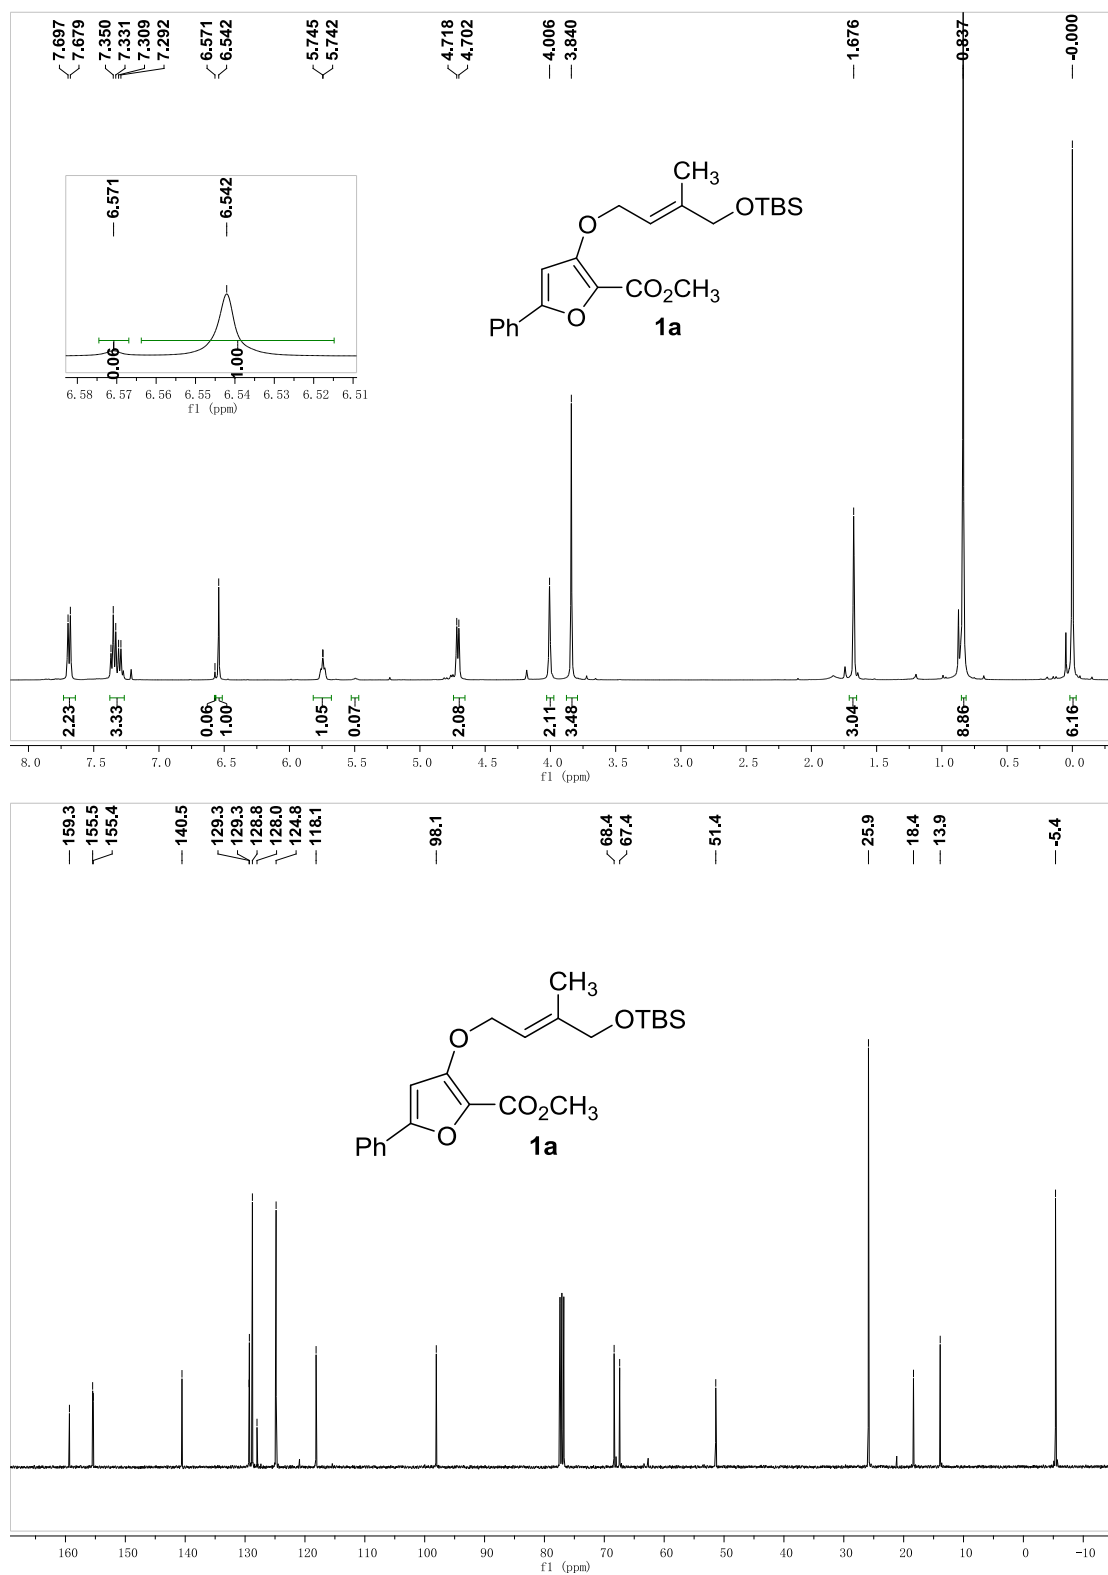

Supplementary Figure 1. <sup>1</sup>H and <sup>13</sup>C spectra for substrate **1a**

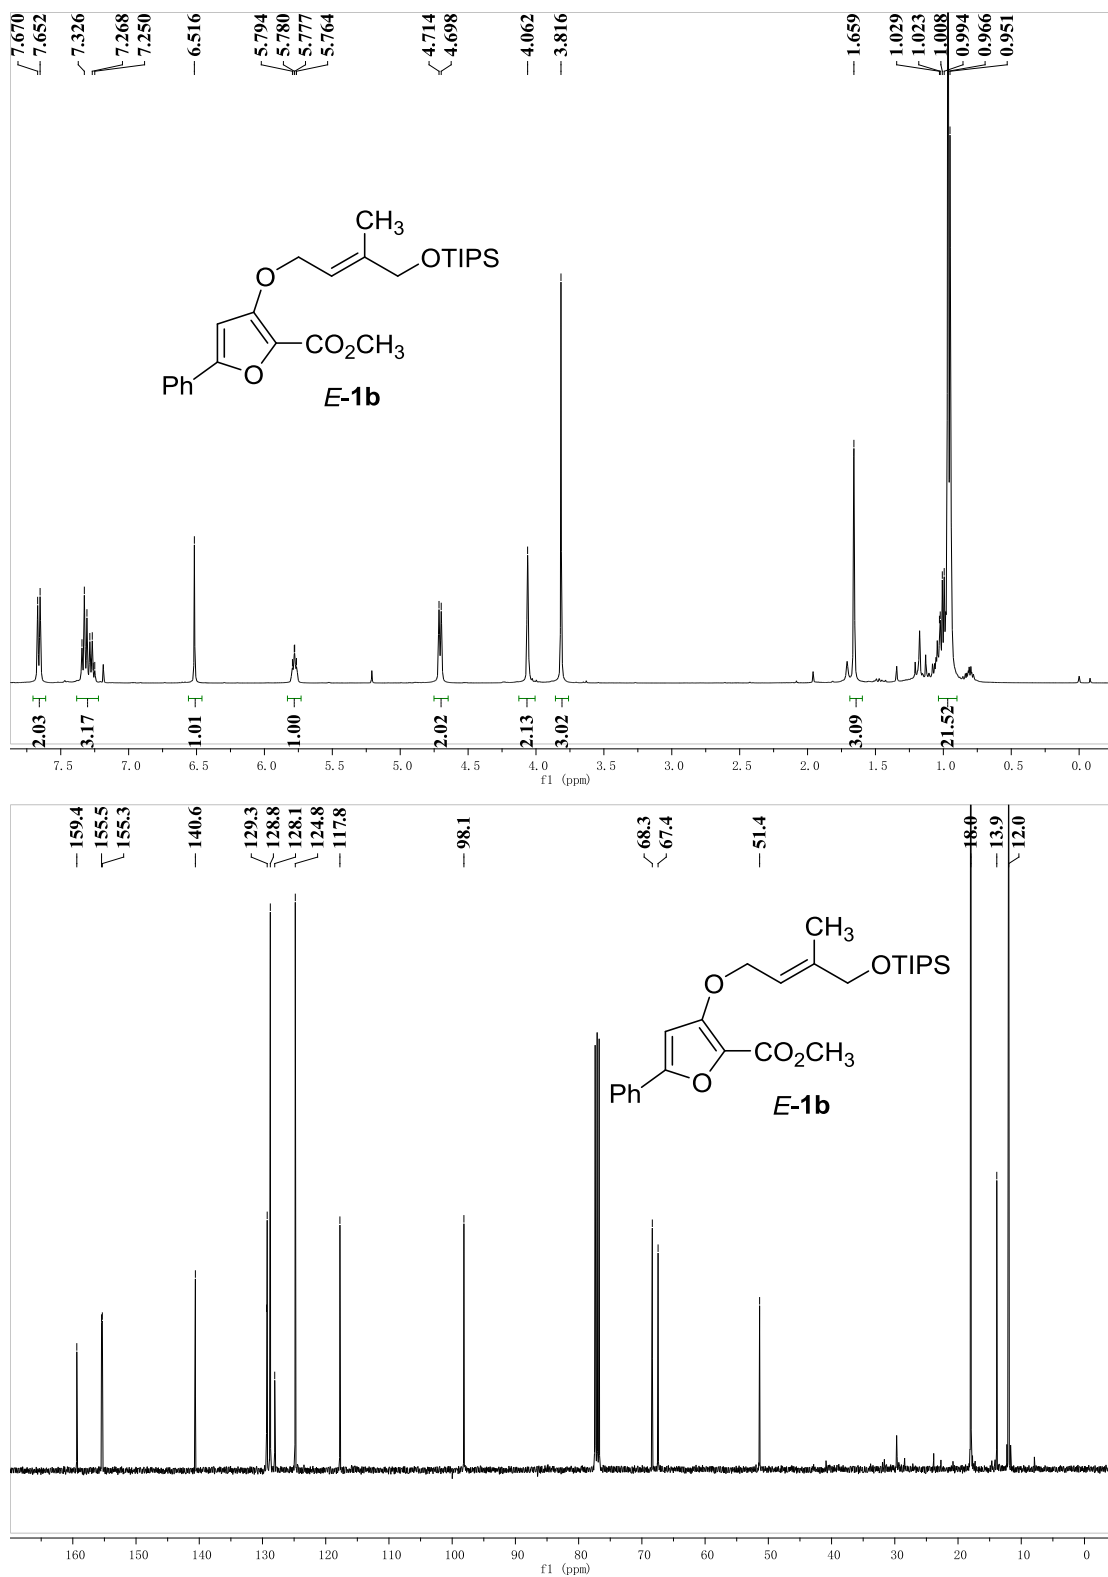

Supplementary Figure 2. <sup>1</sup>H and <sup>13</sup>C spectra for substrate *E-1b*

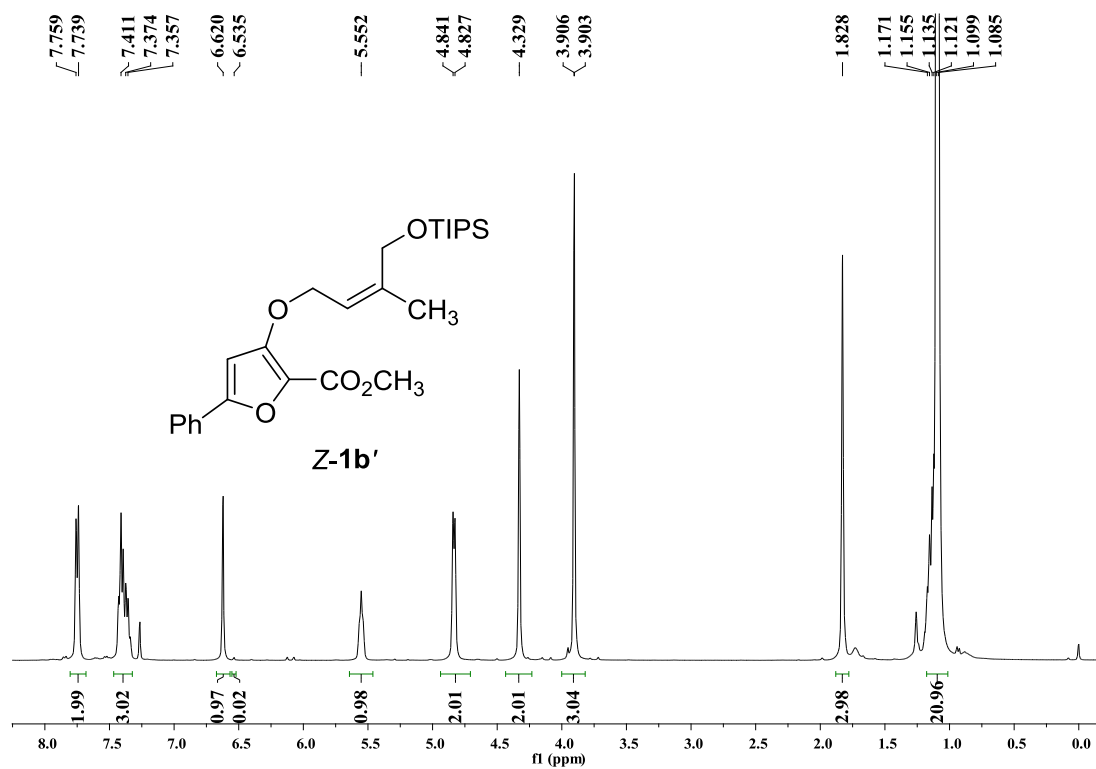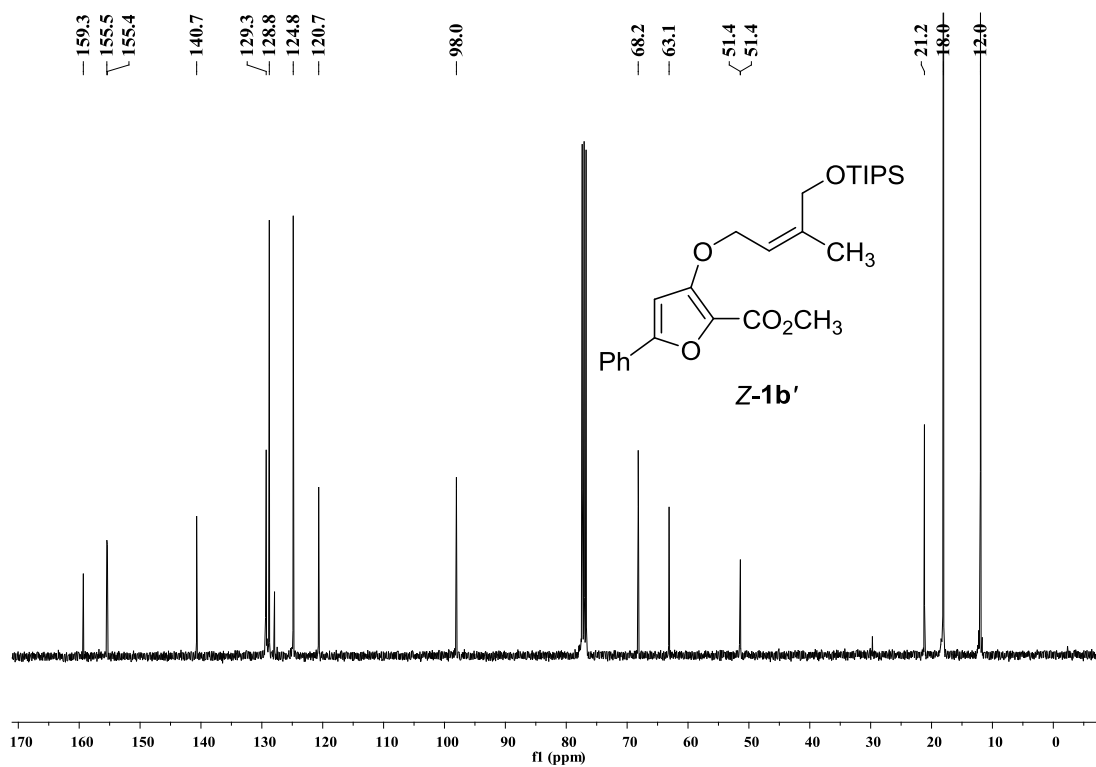

Supplementary Figure 3. <sup>1</sup>H and <sup>13</sup>C spectra for substrate Z-1b'



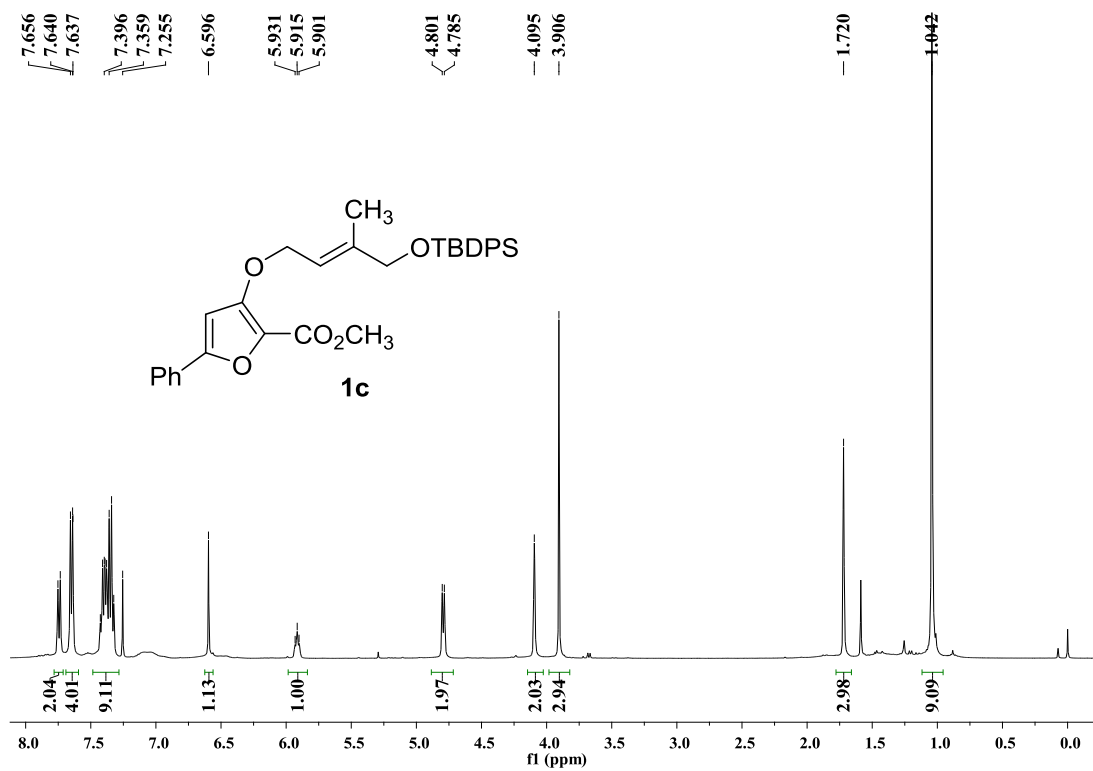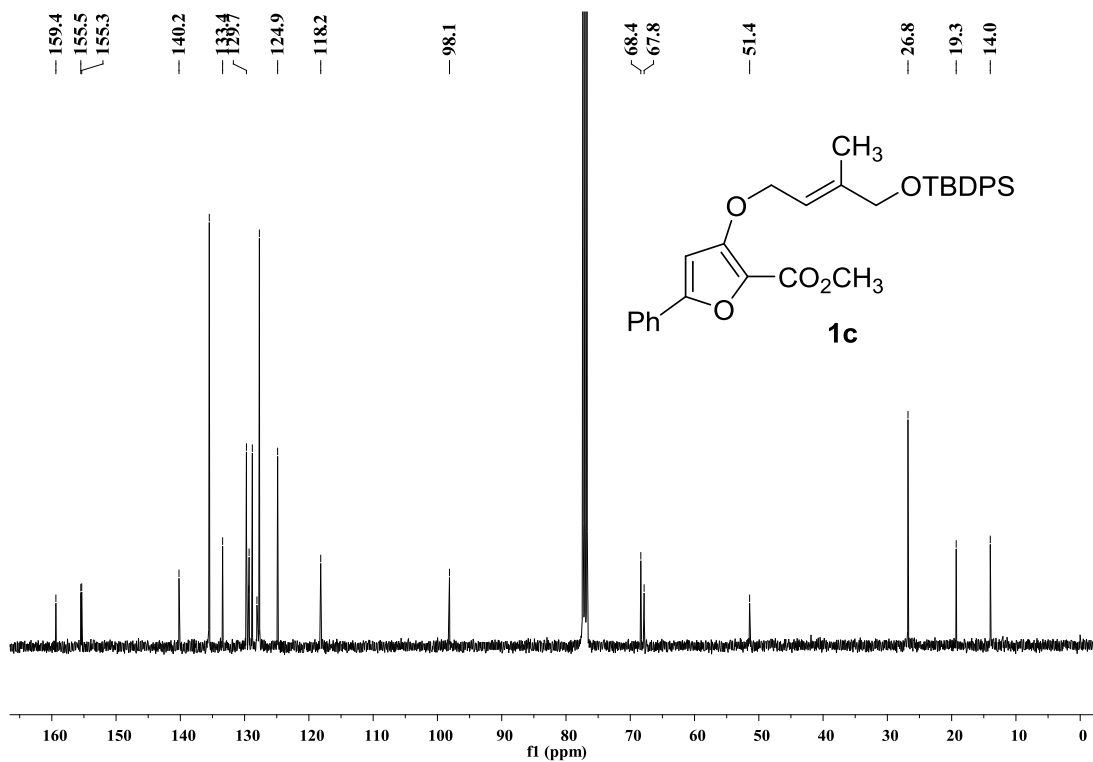

Supplementary Figure 4. <sup>1</sup>H and <sup>13</sup>C spectra for substrate 1c

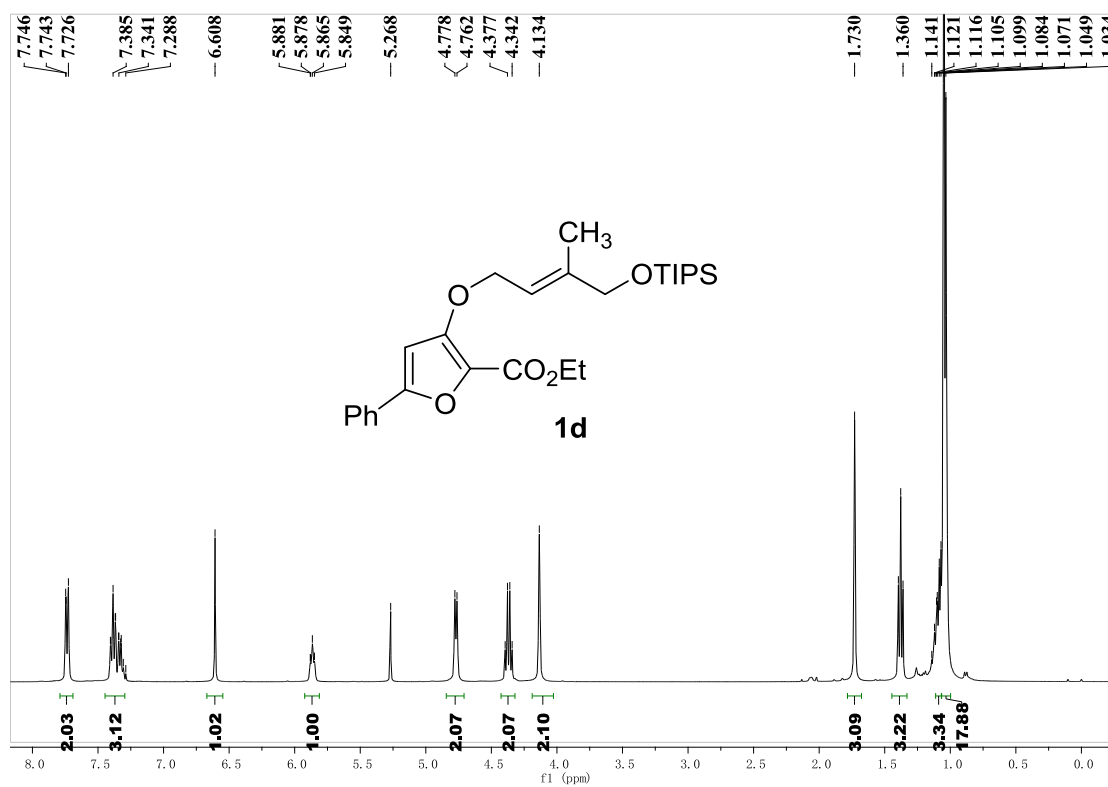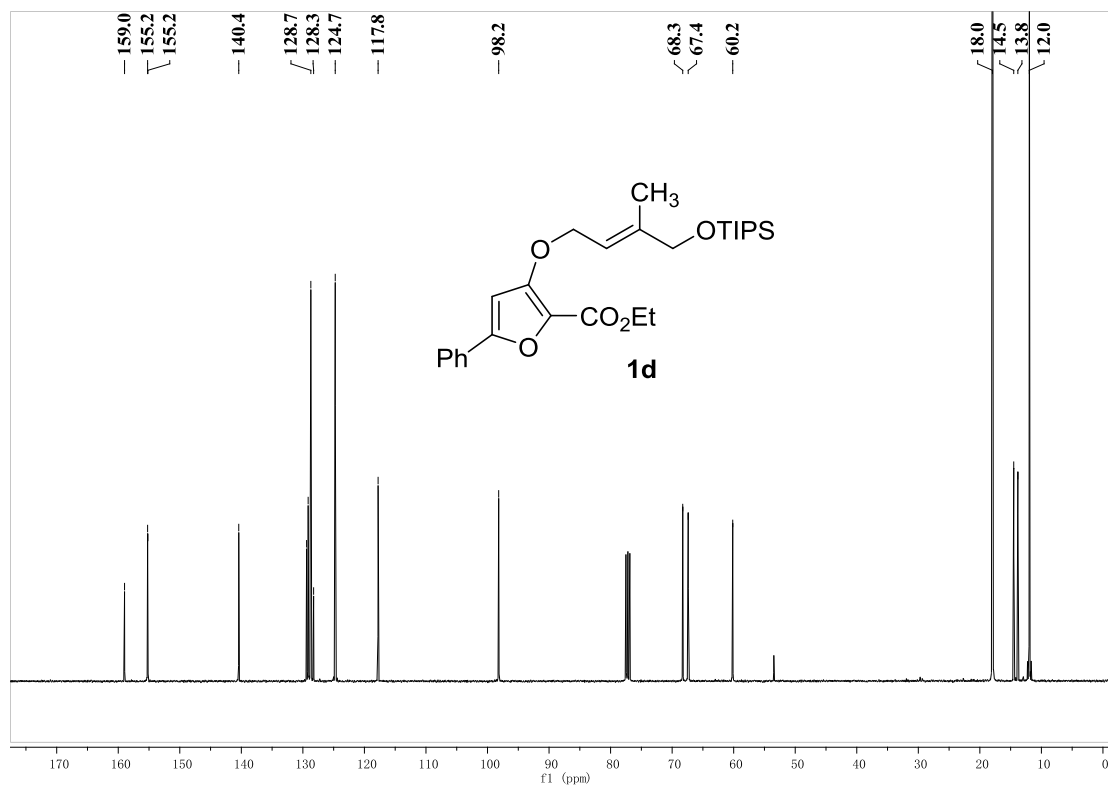

Supplementary Figure 5. <sup>1</sup>H and <sup>13</sup>C spectra for substrate 1d

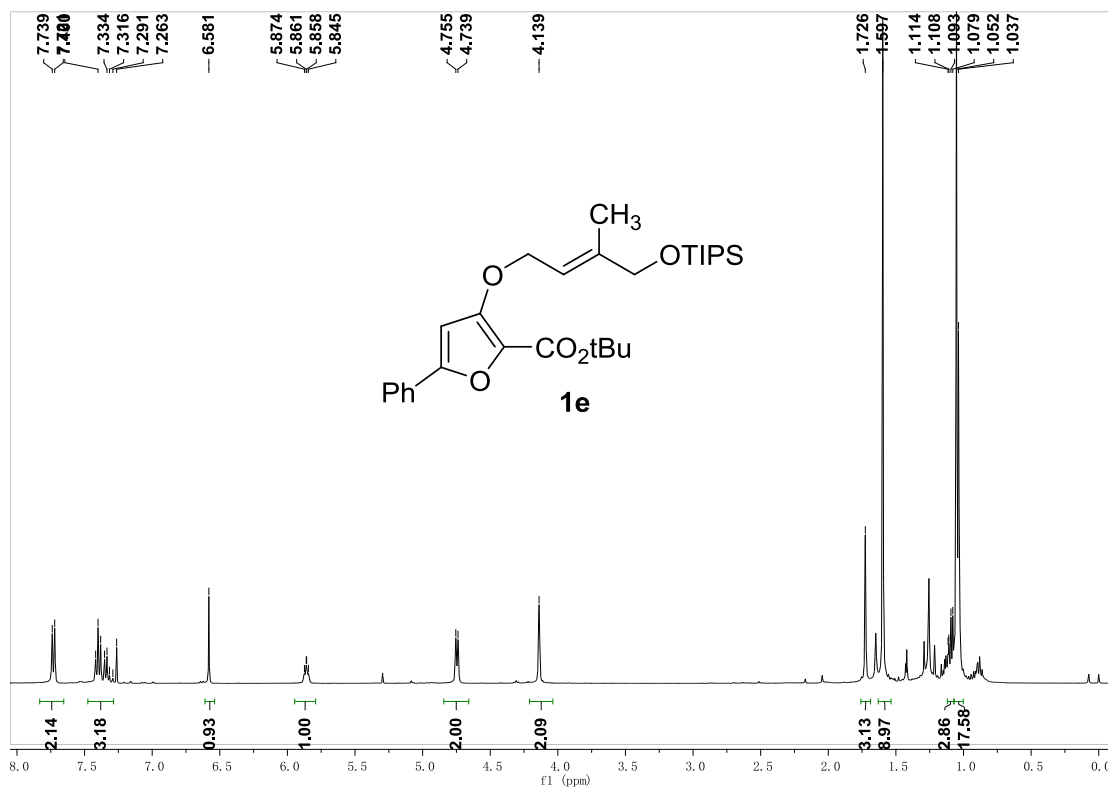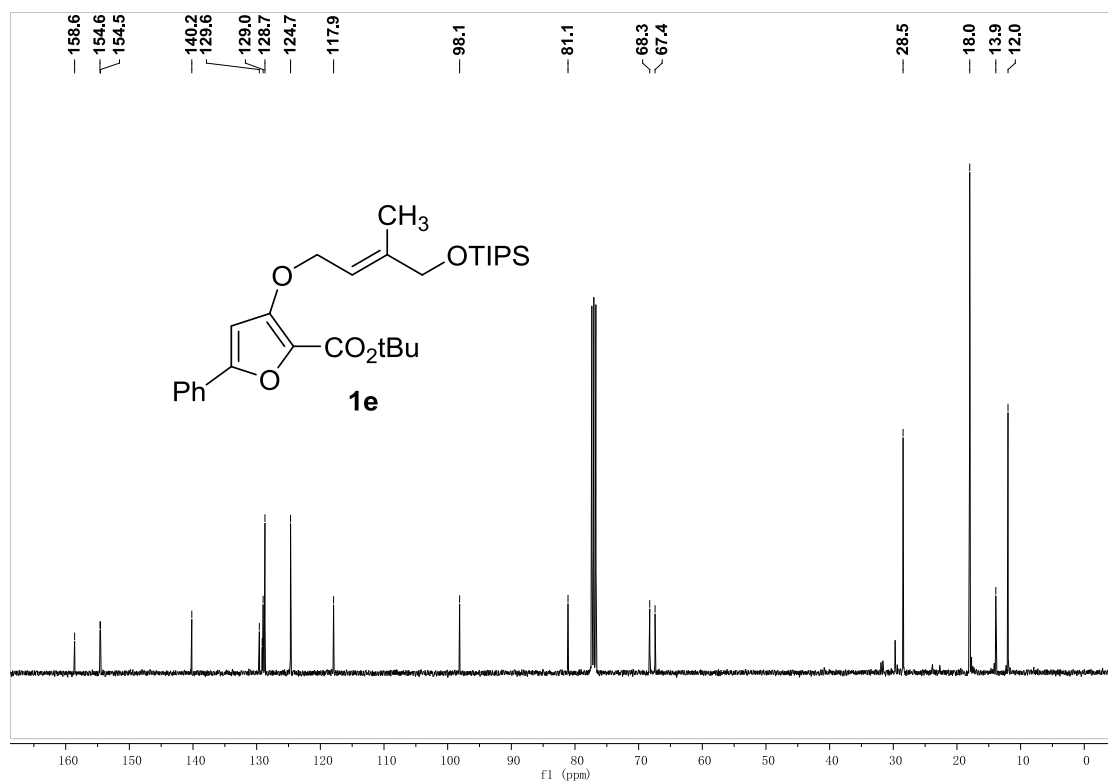

Supplementary Figure 6. <sup>1</sup>H and <sup>13</sup>C spectra for substrate **1e**

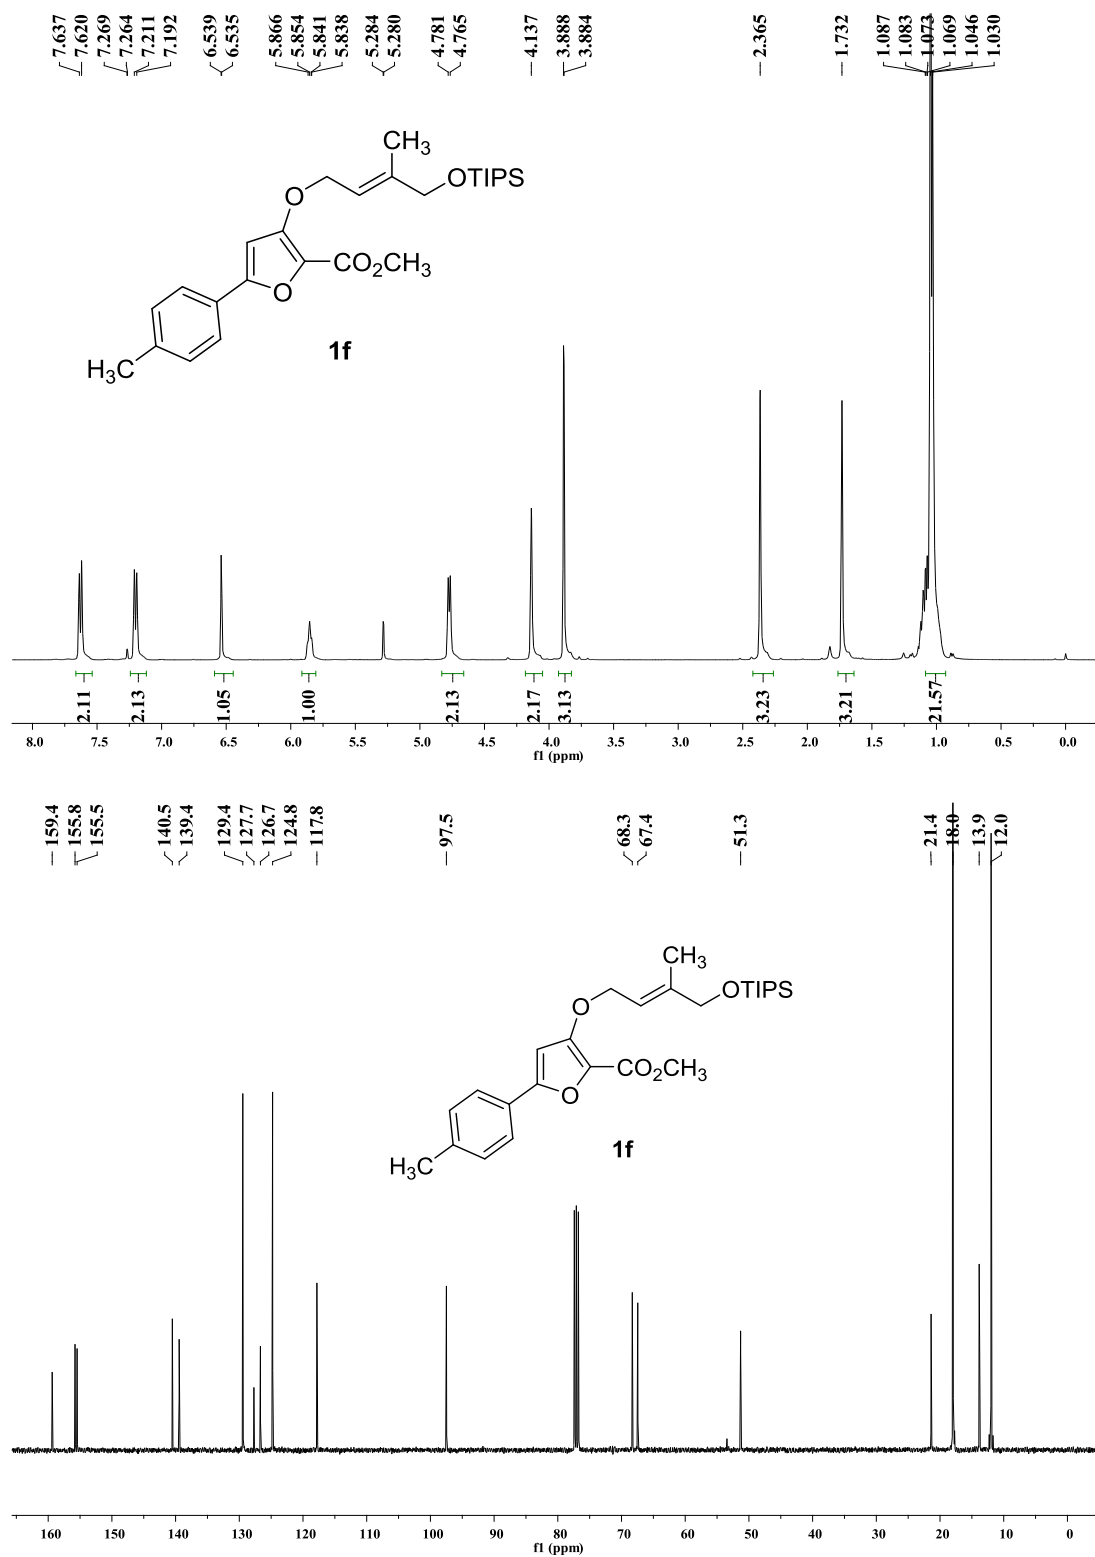

Supplementary Figure 7.  $^1\text{H}$  and  $^{13}\text{C}$  spectra for substrate **1f**

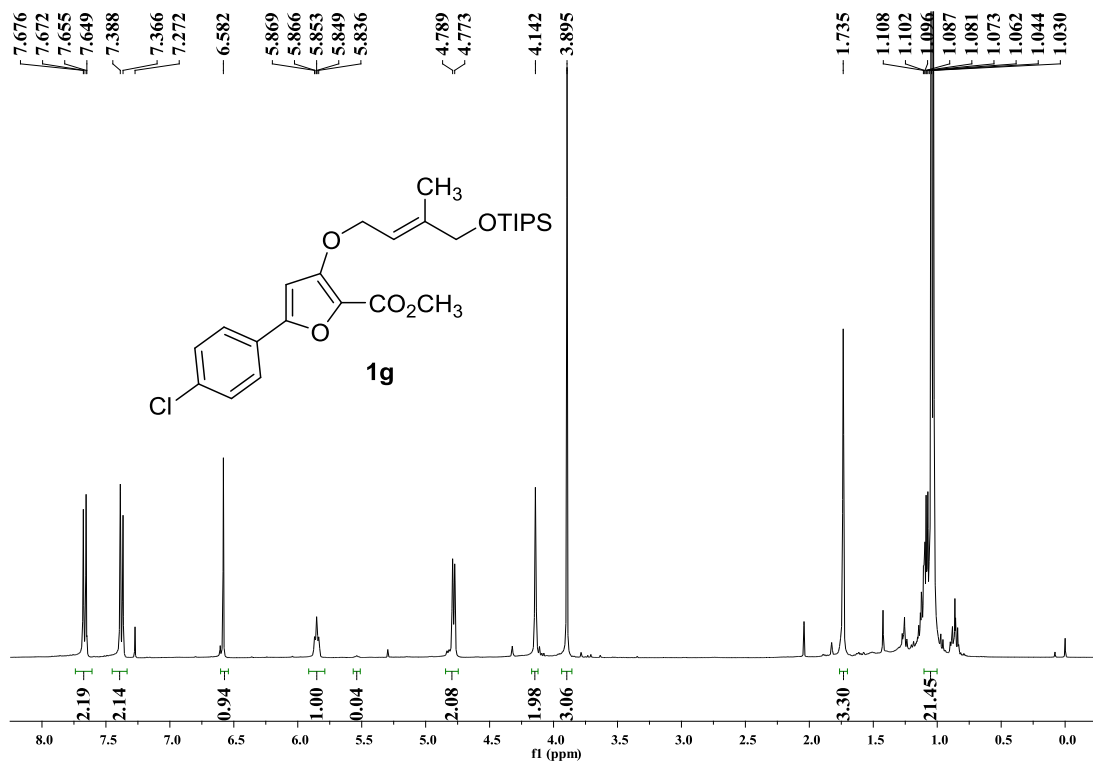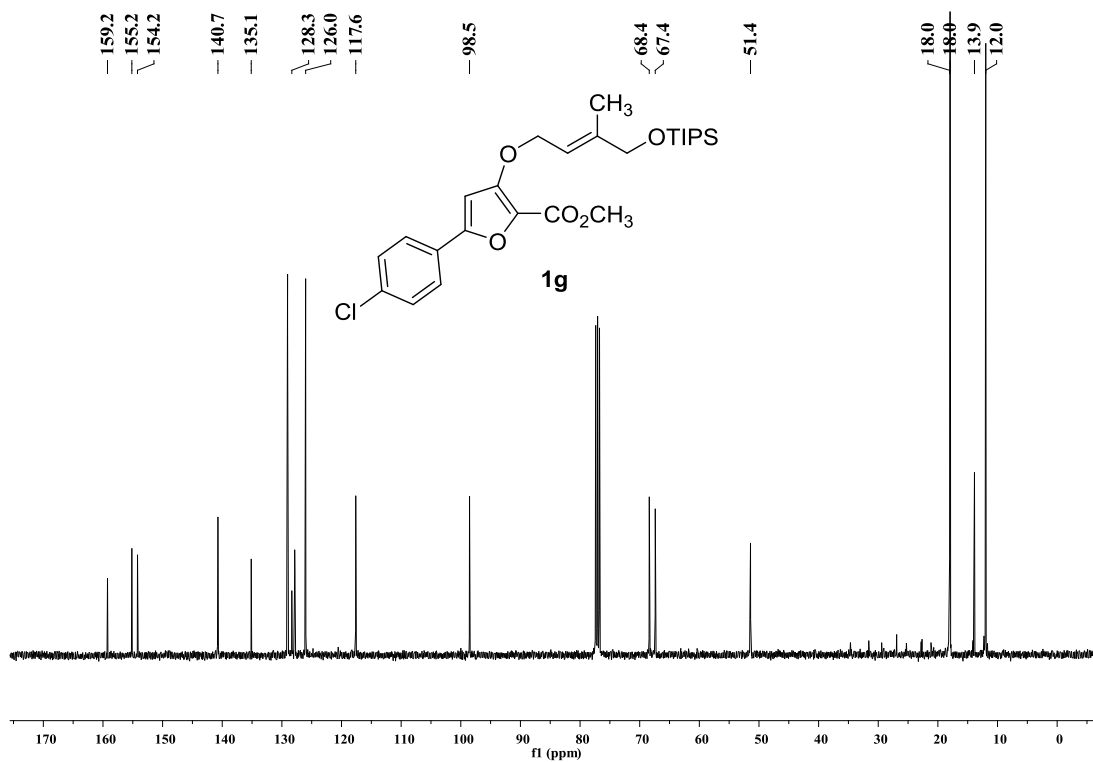

Supplementary Figure 8. <sup>1</sup>H and <sup>13</sup>C spectra for substrate 1g

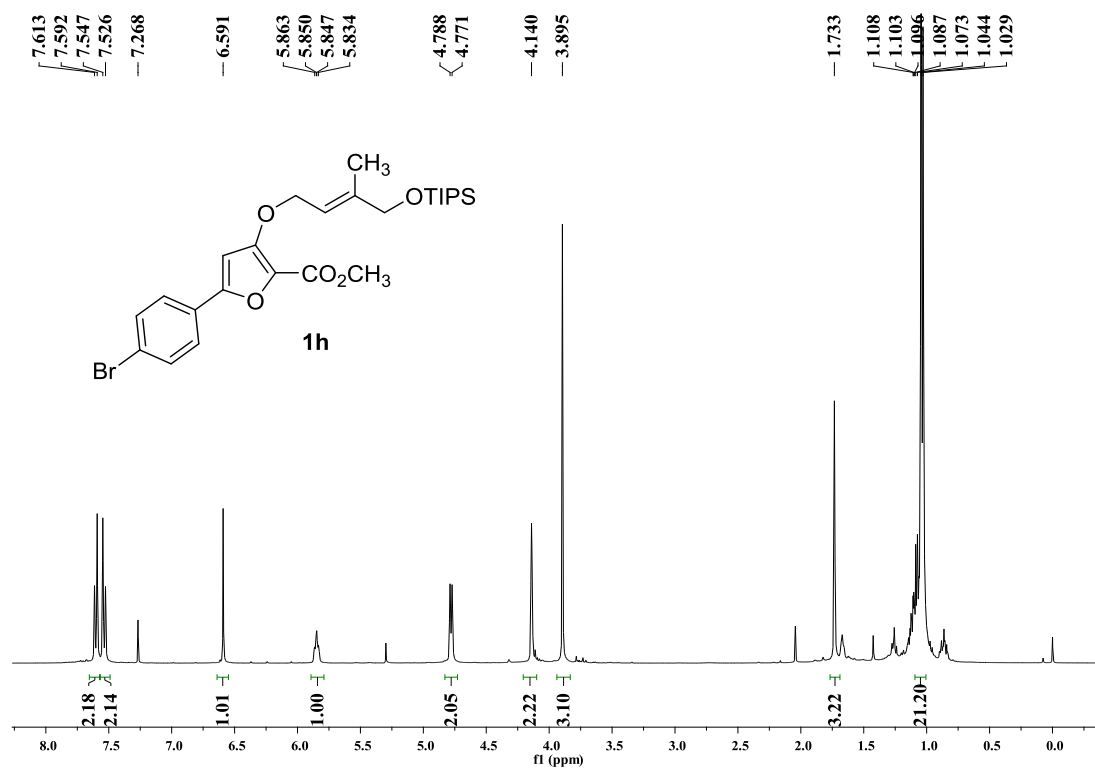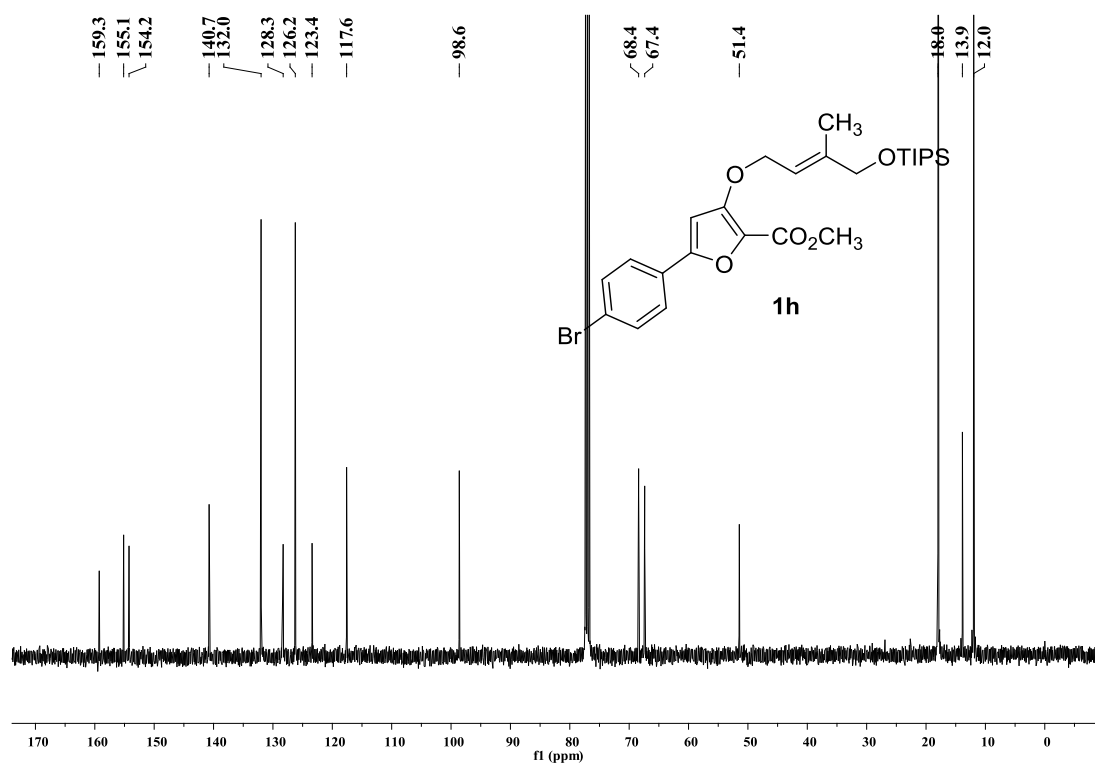

Supplementary Figure 9. <sup>1</sup>H and <sup>13</sup>C spectra for substrate 1h

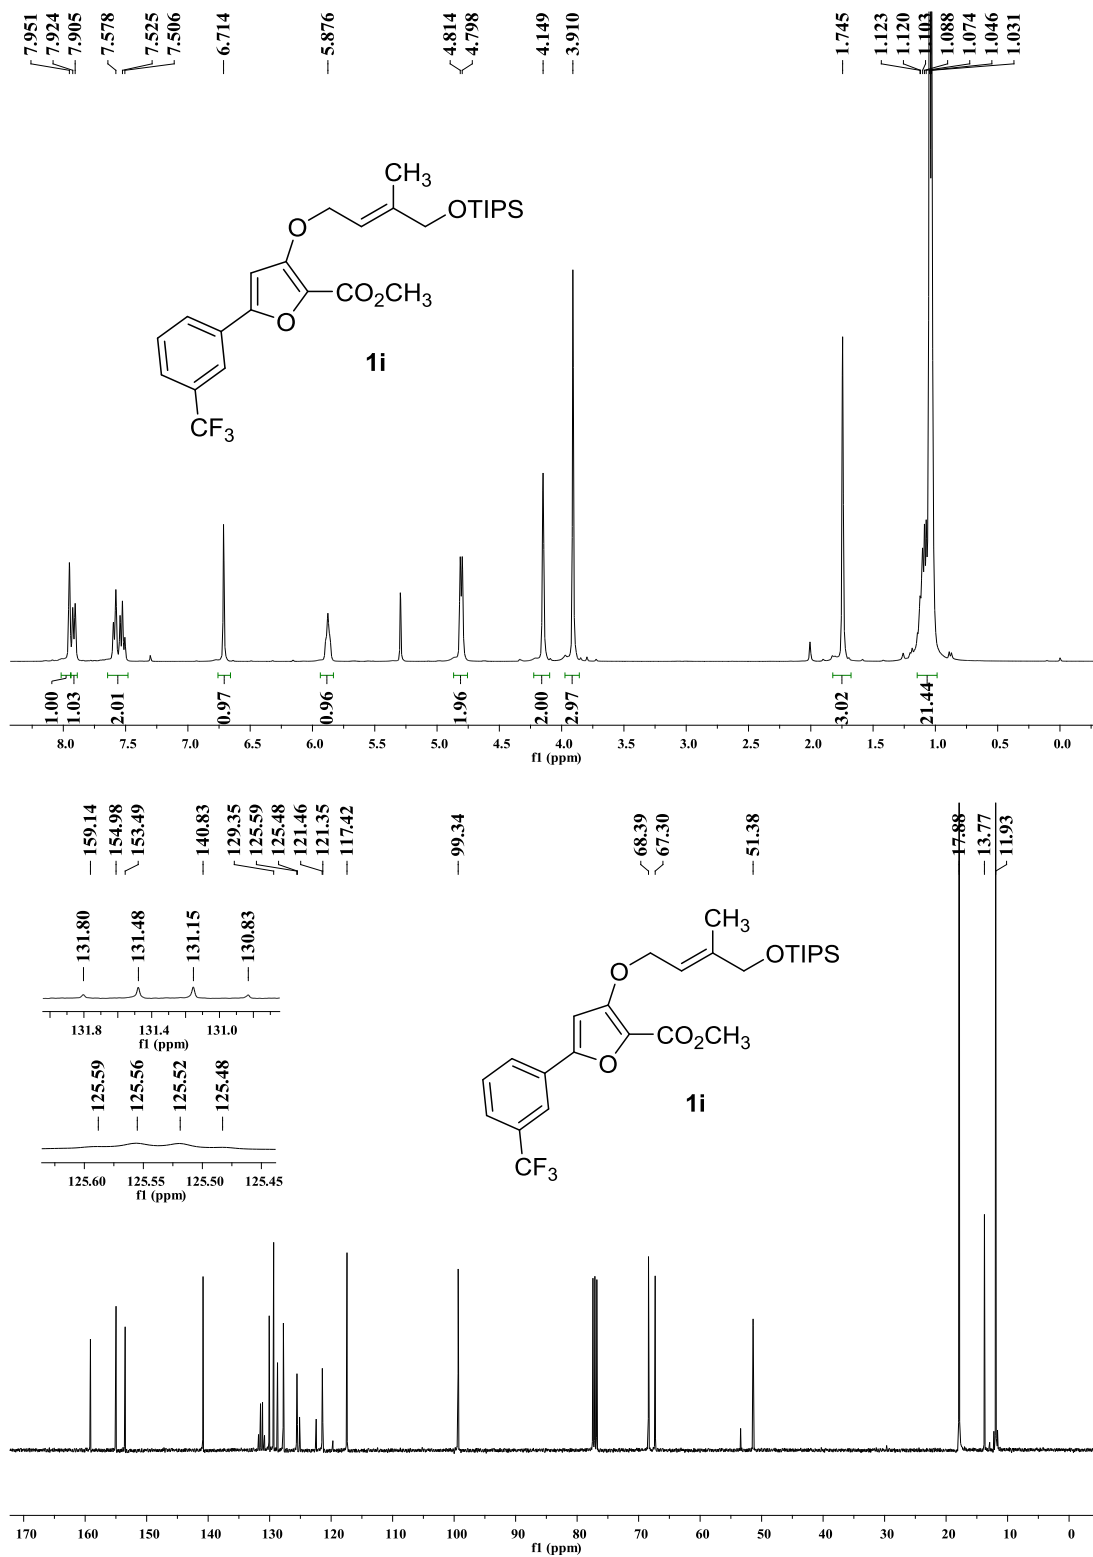

Supplementary Figure 10.  $^1\text{H}$  and  $^{13}\text{C}$  spectra for substrate **1i**

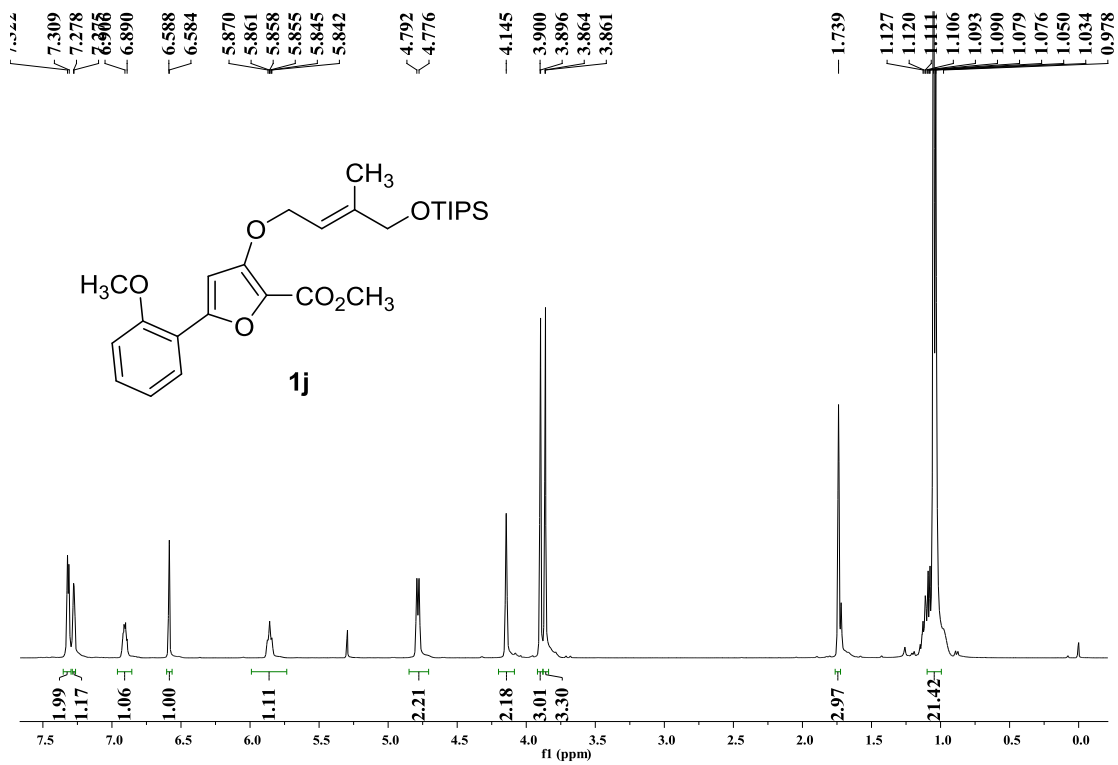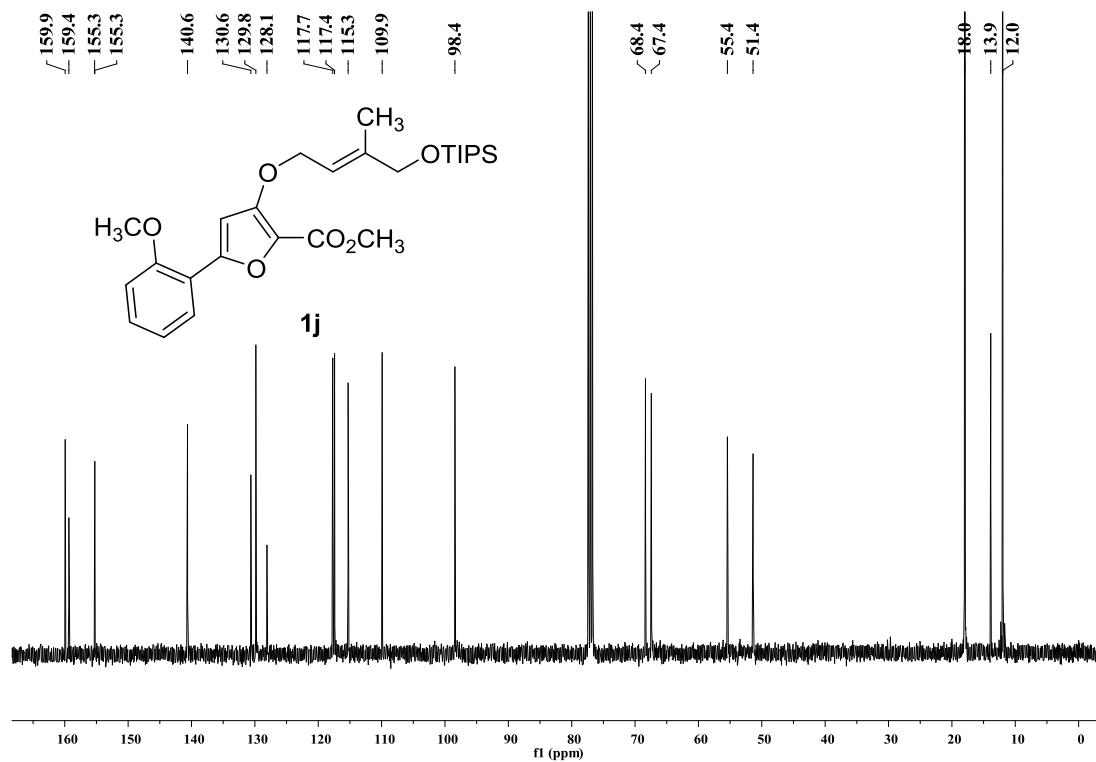

Supplementary Figure 11. <sup>1</sup>H and <sup>13</sup>C spectra for substrate **1j**



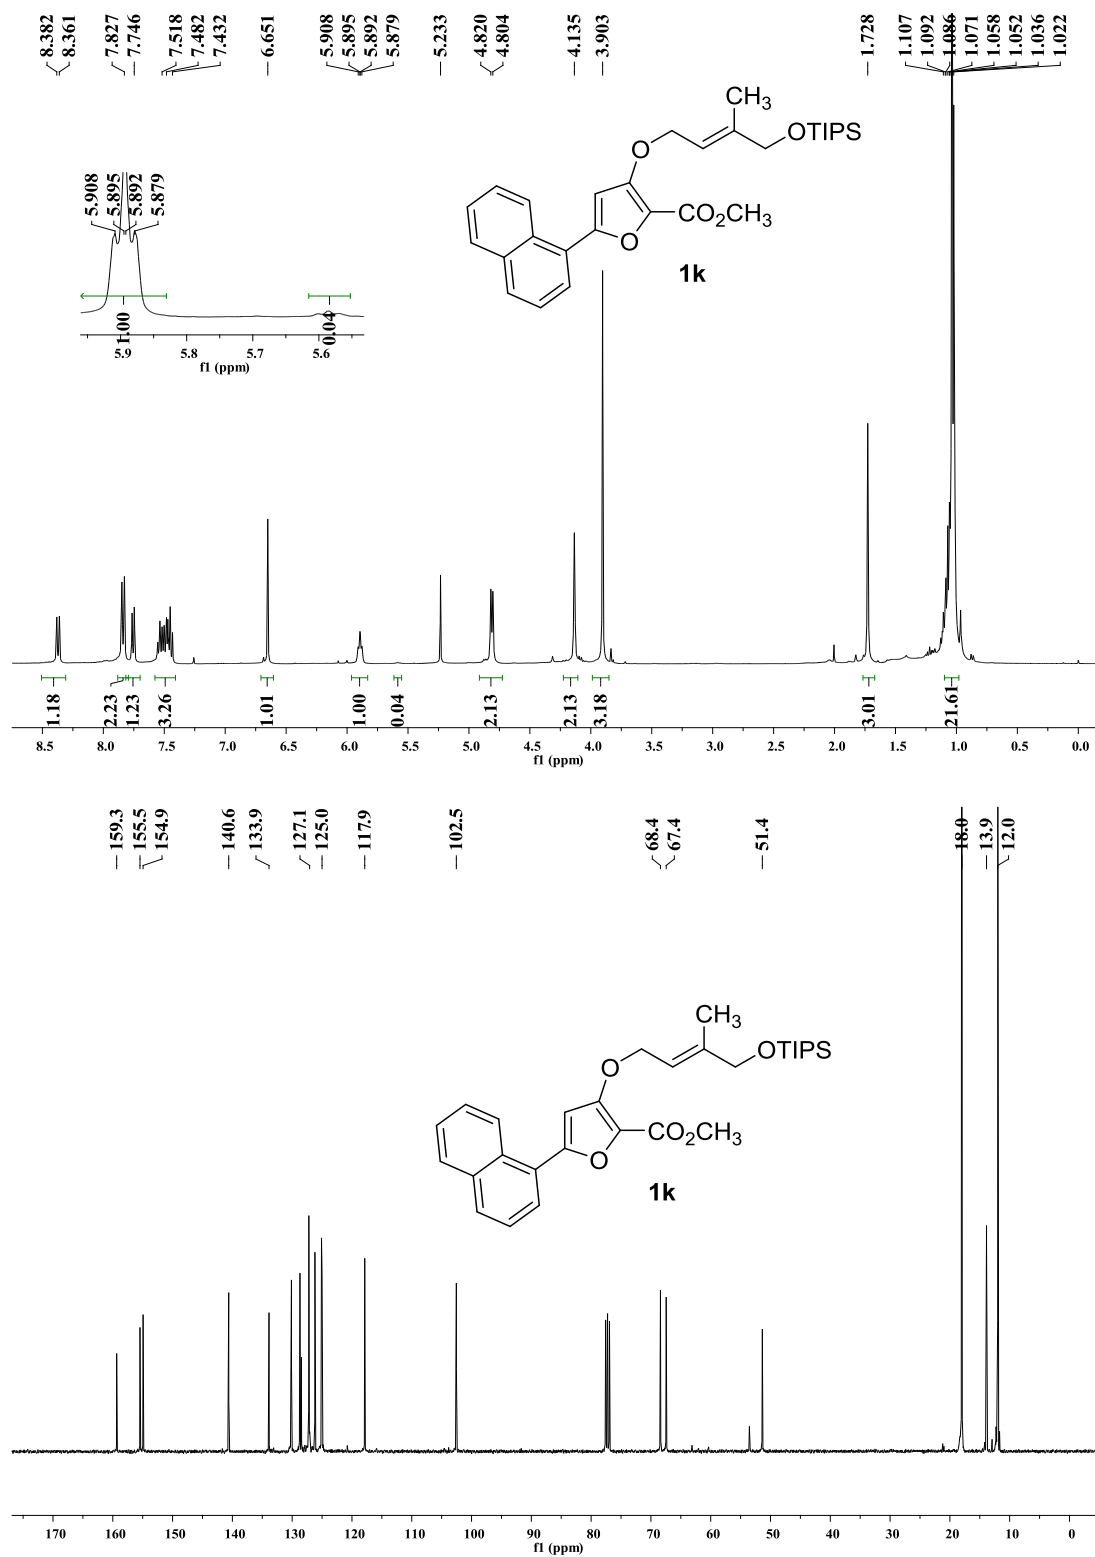

Supplementary Figure 12. <sup>1</sup>H and <sup>13</sup>C spectra for substrate **1k**

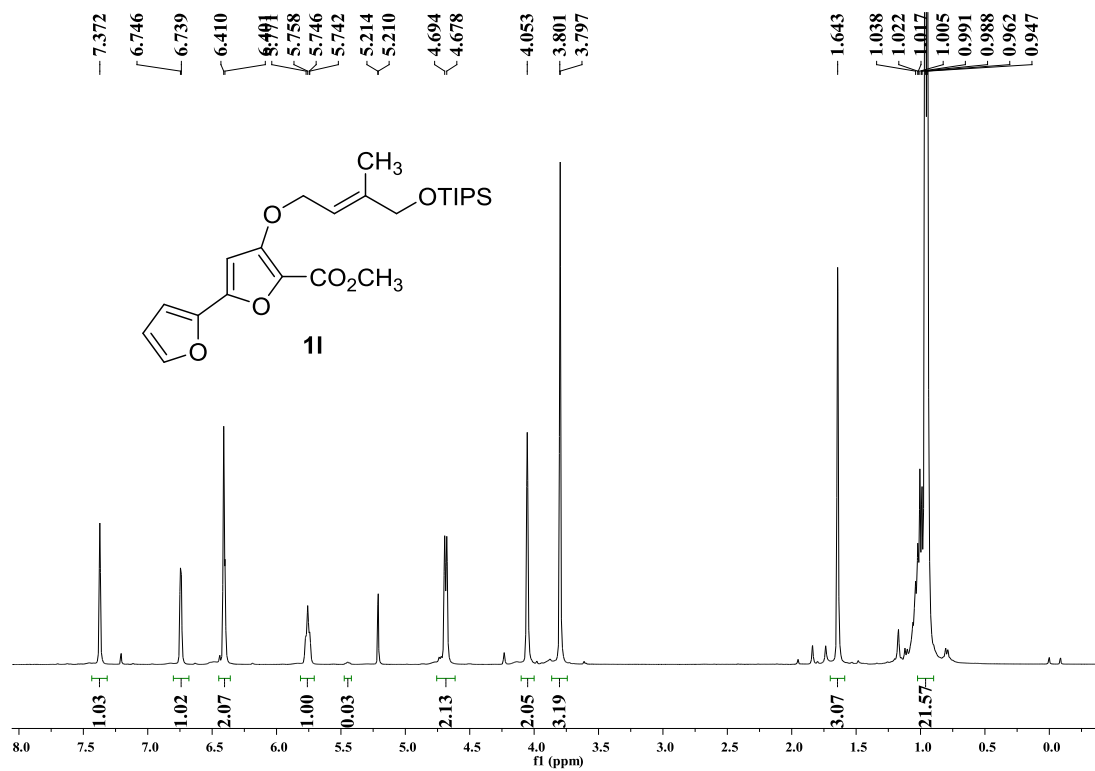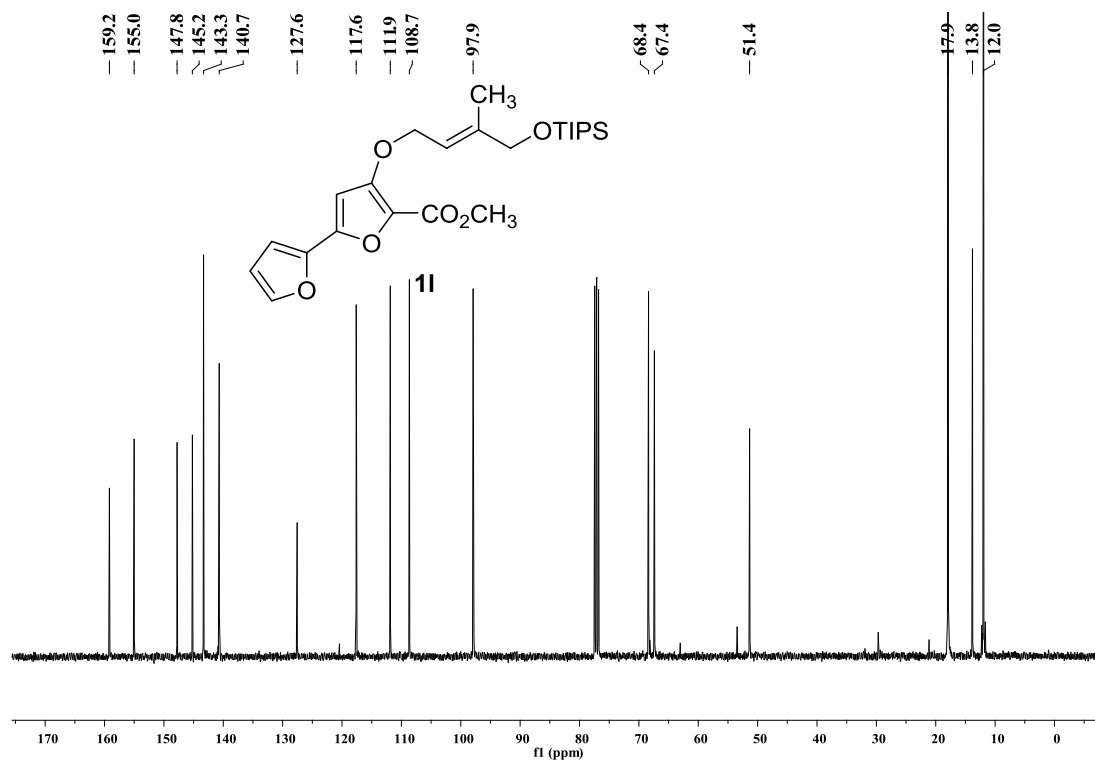

Supplementary Figure 13. <sup>1</sup>H and <sup>13</sup>C spectra for substrate **11**

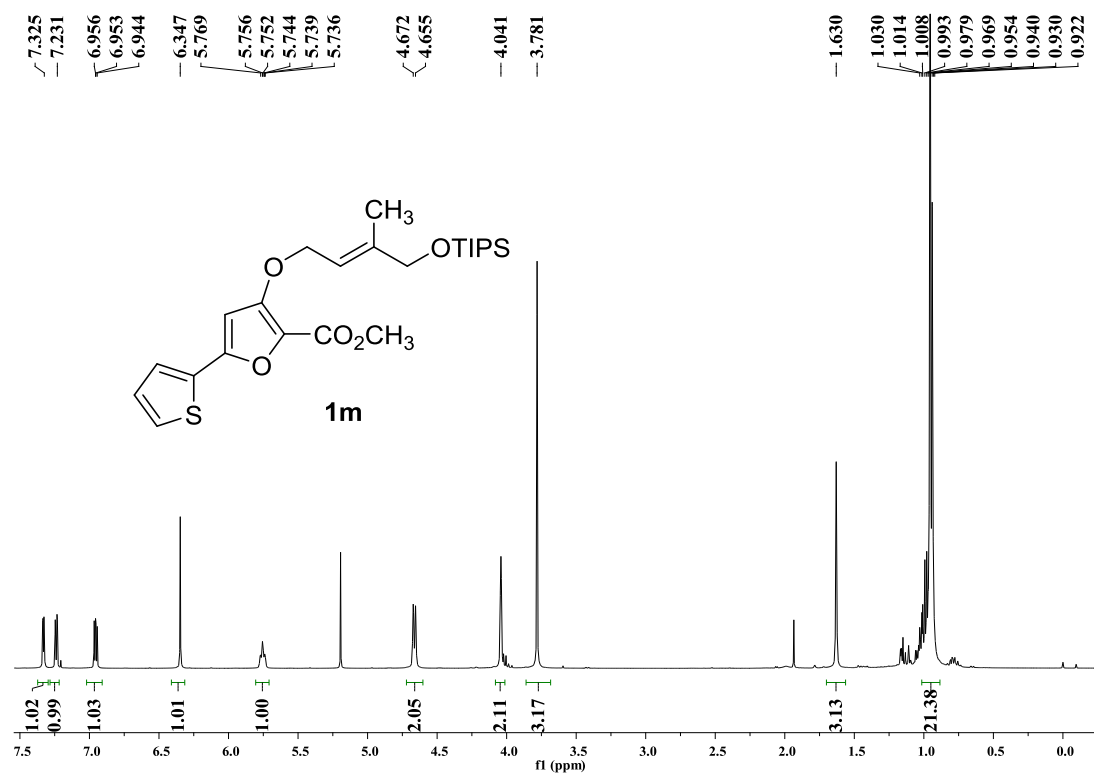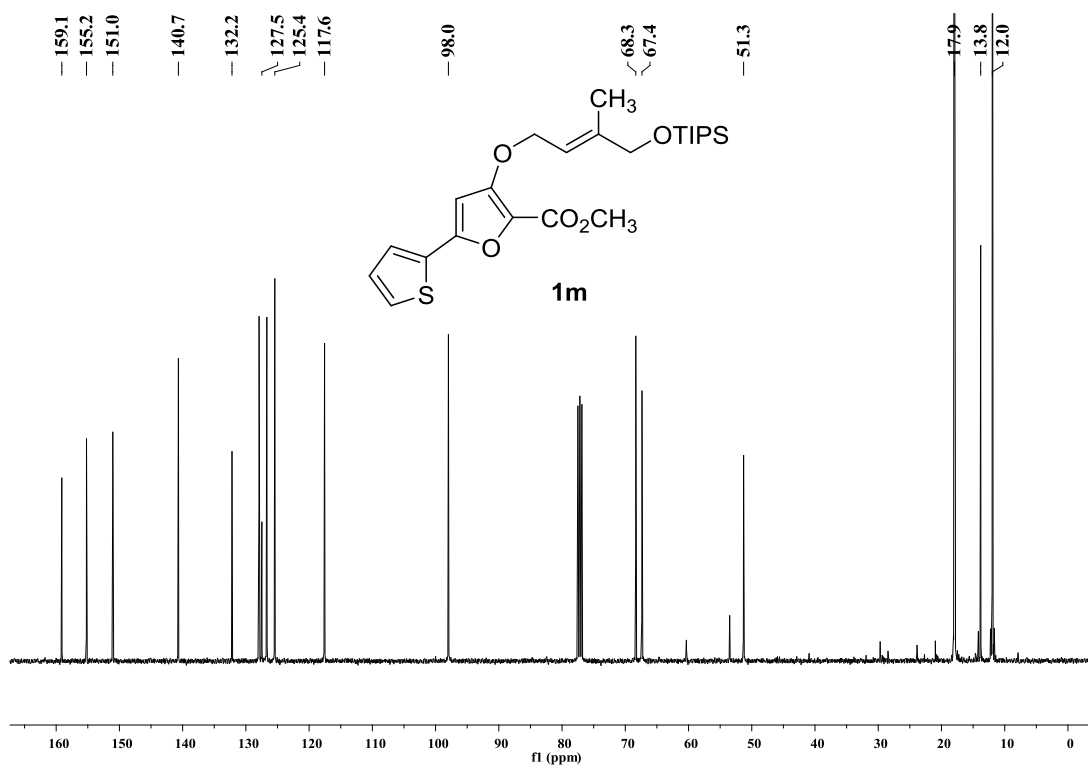

Supplementary Figure 14. <sup>1</sup>H and <sup>13</sup>C spectra for substrate **11**

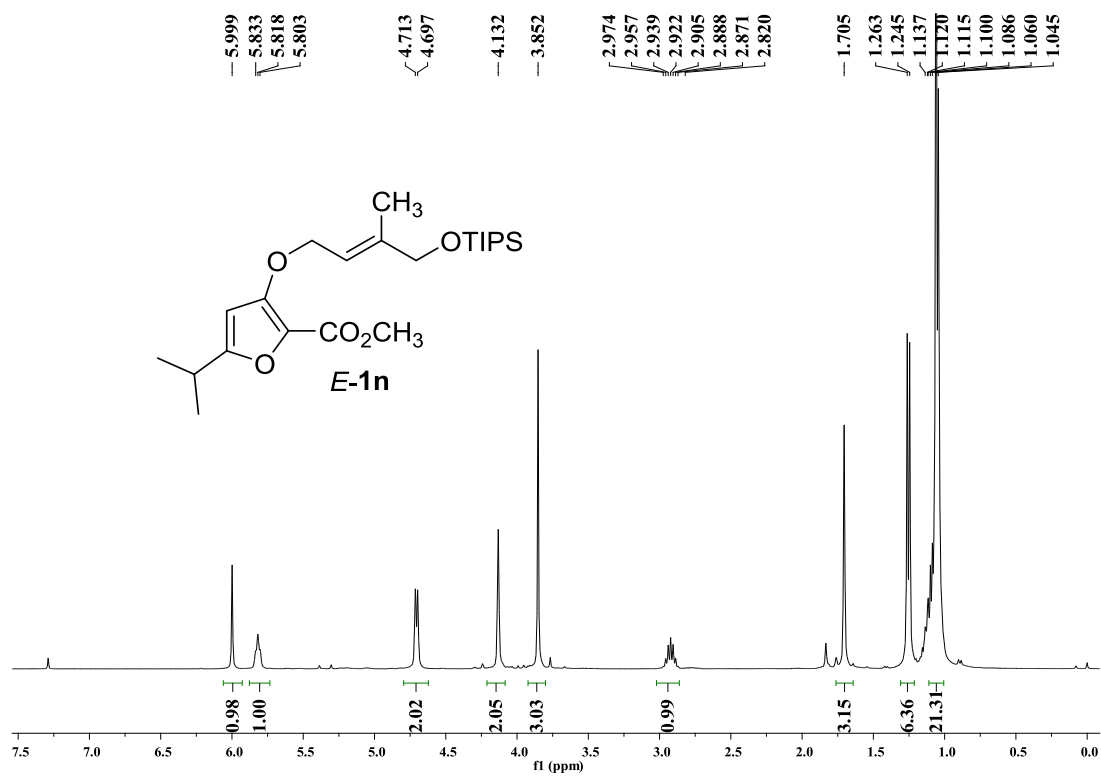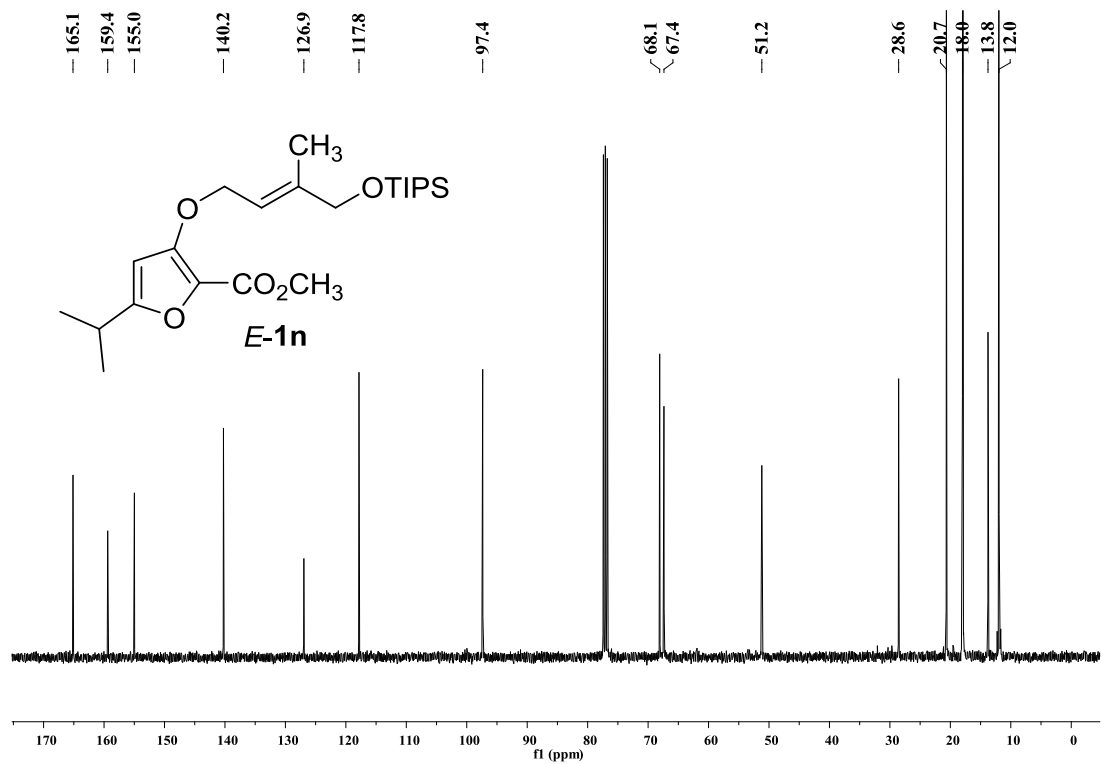

Supplementary Figure 15. <sup>1</sup>H and <sup>13</sup>C spectra for substrate *E-1n*

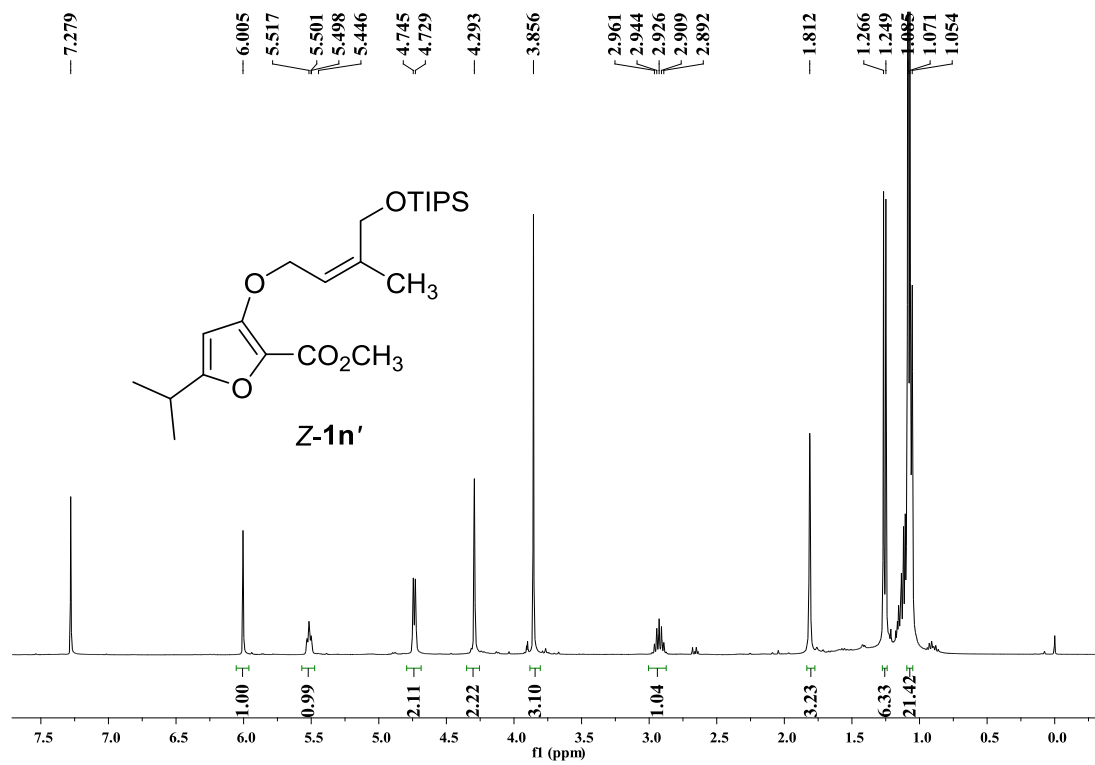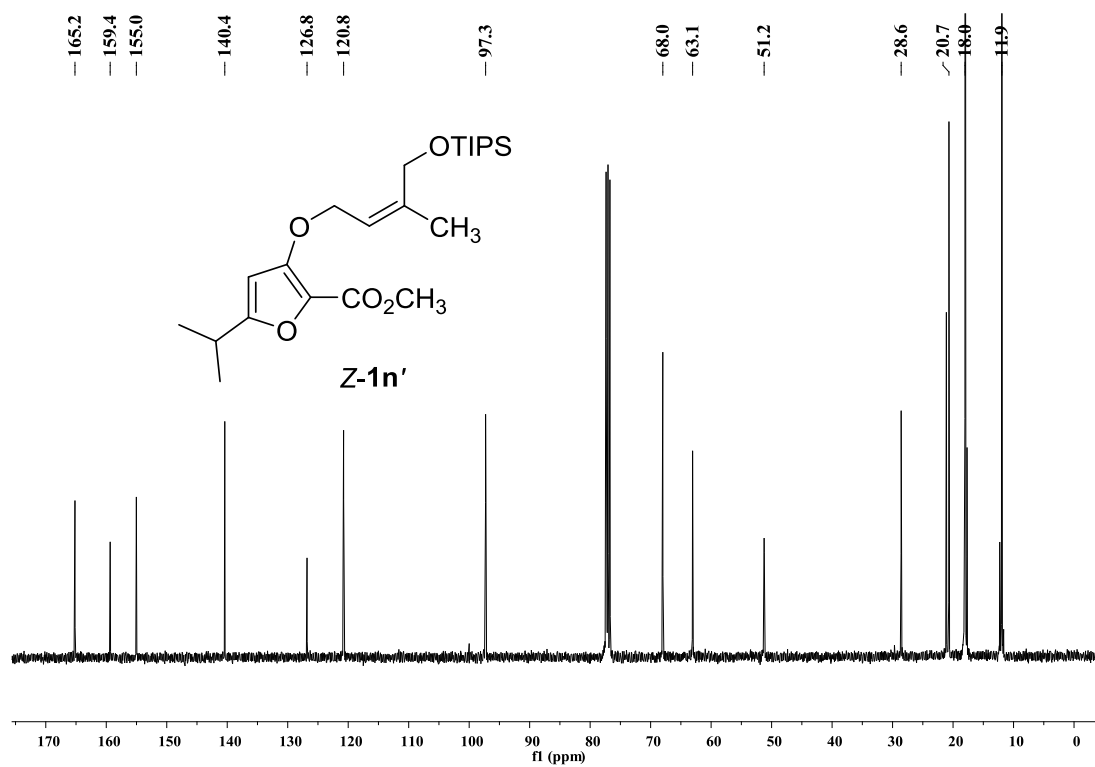

Supplementary Figure 16.  $^1\text{H}$  and  $^{13}\text{C}$  spectra for substrate **Z-1n'**

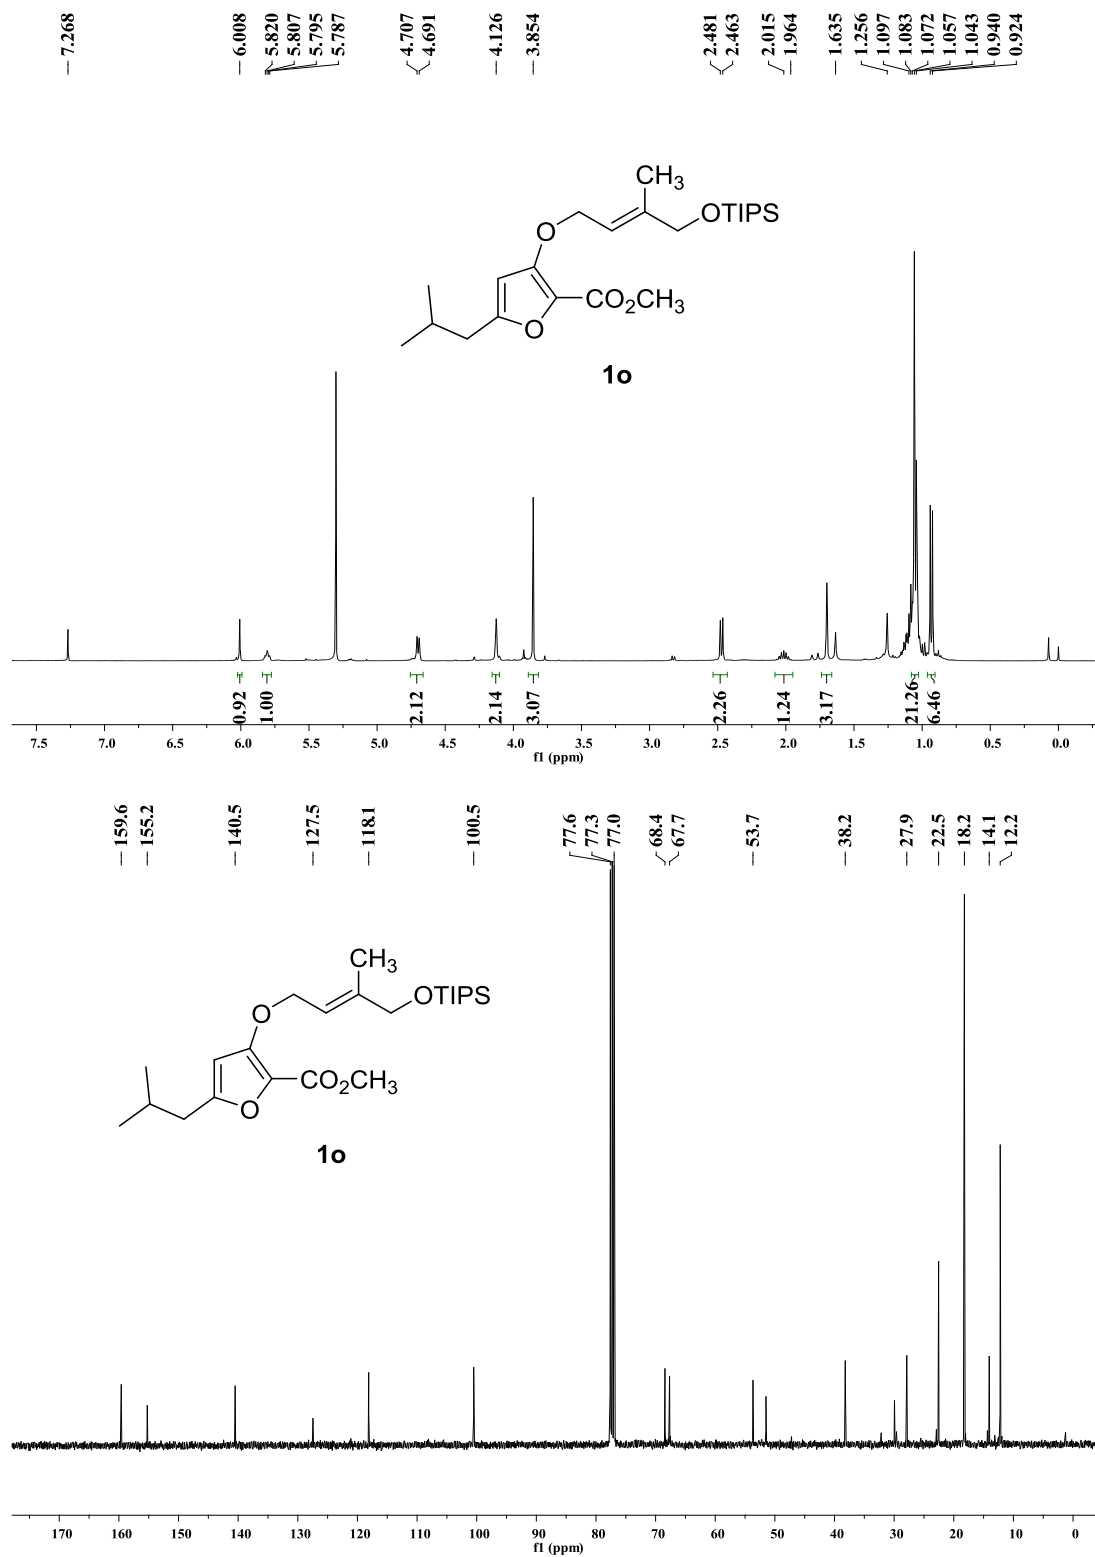

Supplementary Figure 17. <sup>1</sup>H and <sup>13</sup>C spectra for substrate **1o**

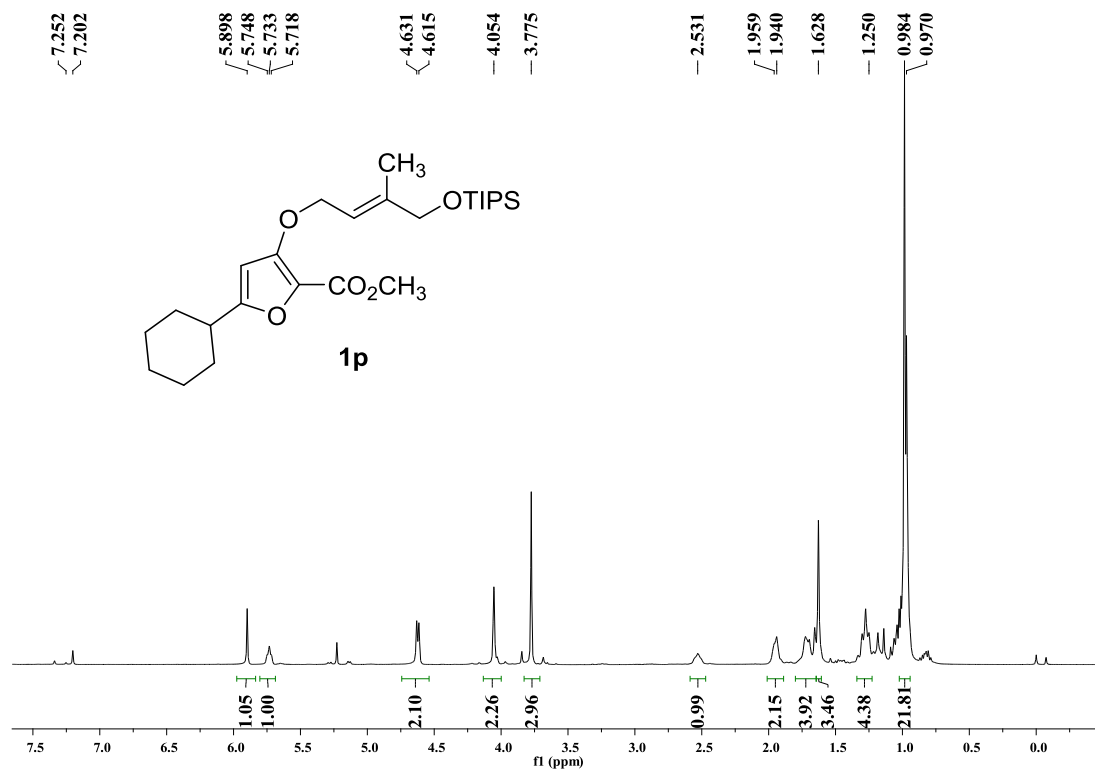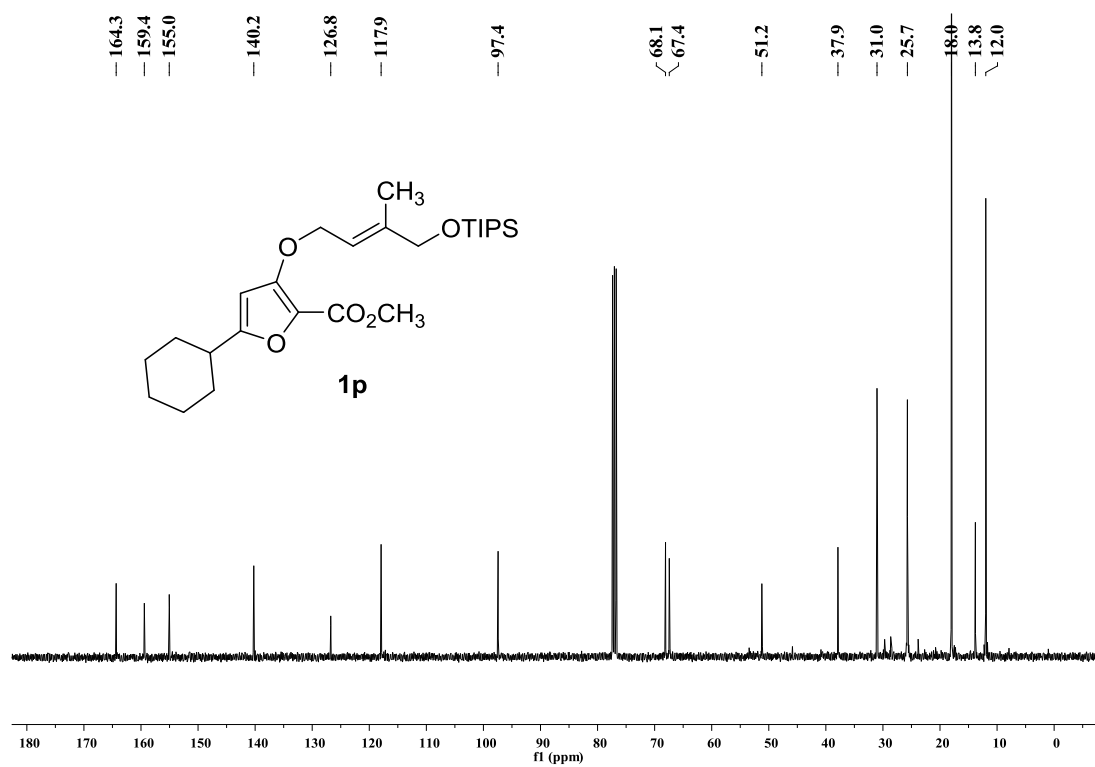

Supplementary Figure 18. <sup>1</sup>H and <sup>13</sup>C spectra for substrate **1p**

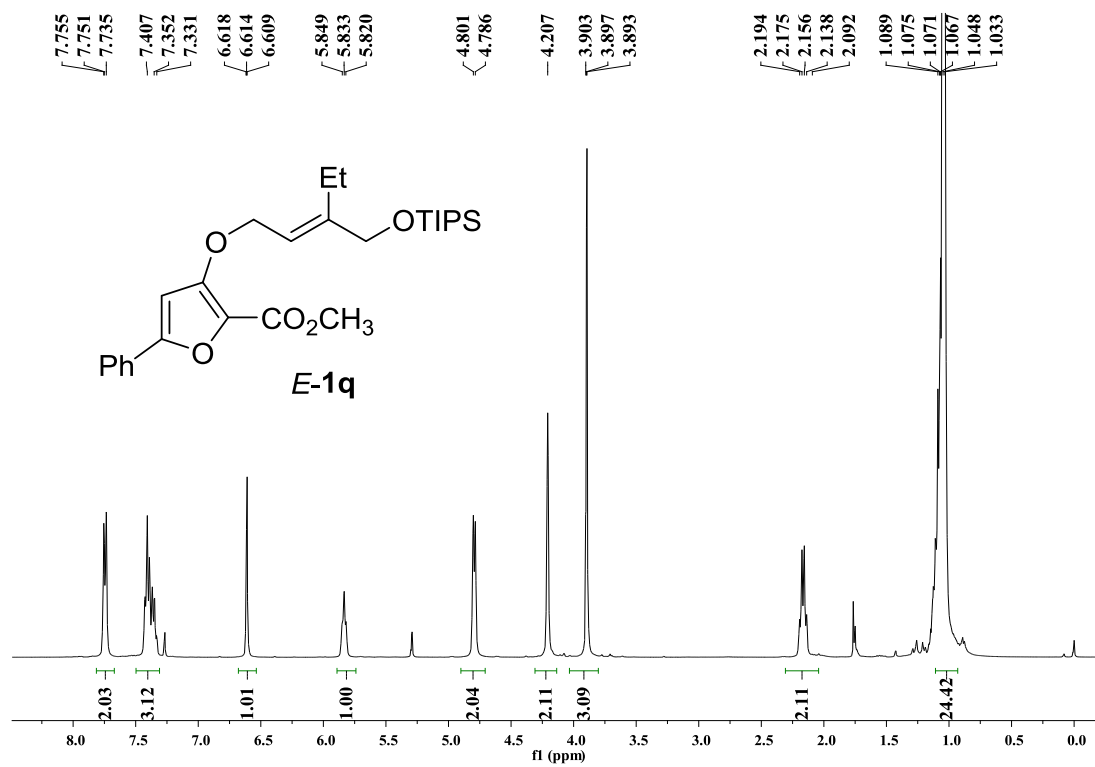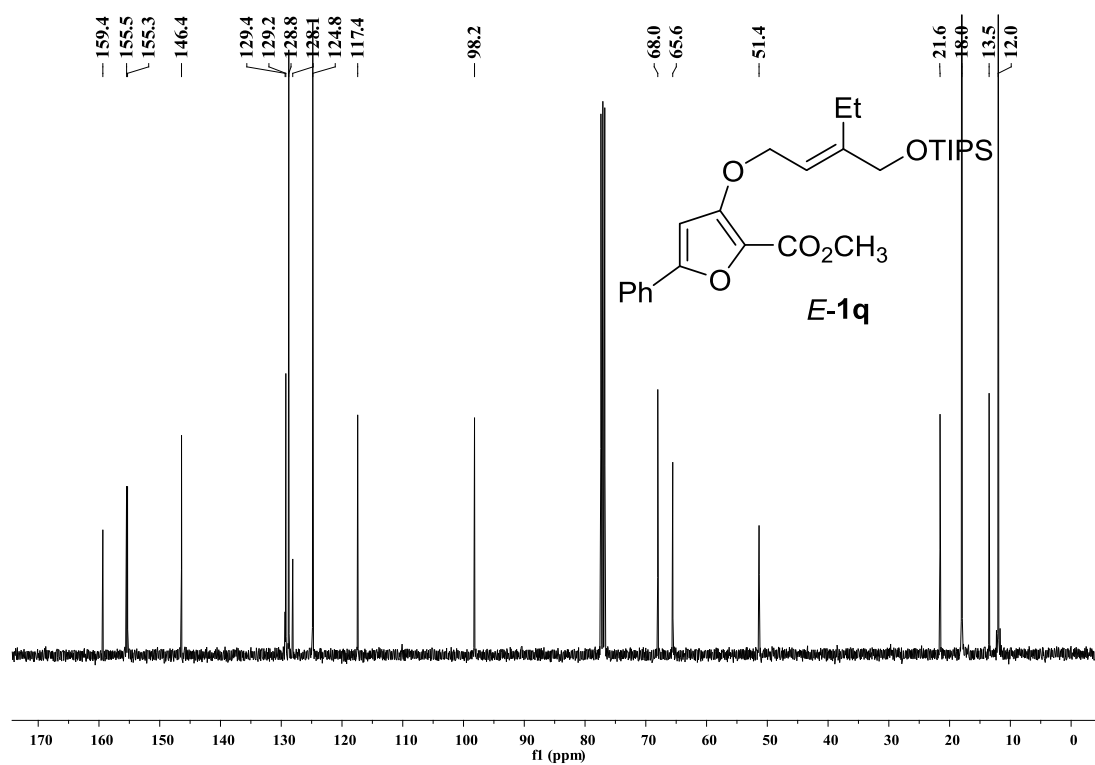

Supplementary Figure 19. <sup>1</sup>H and <sup>13</sup>C spectra for substrate *E-1q*



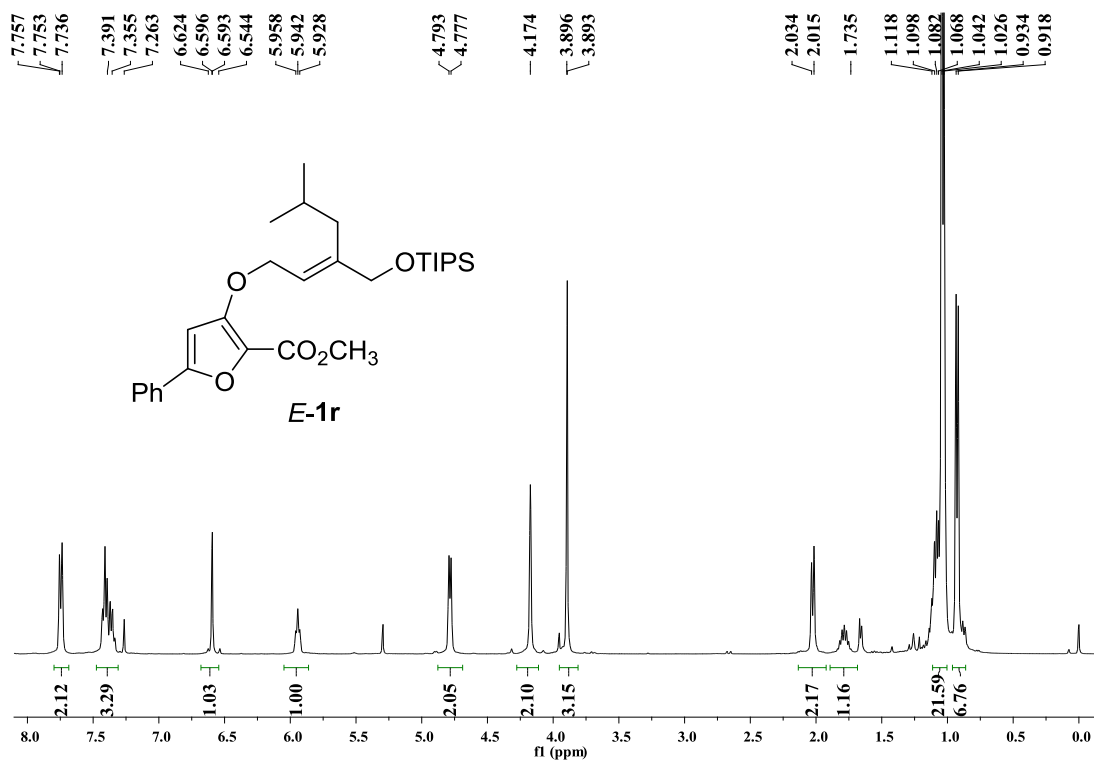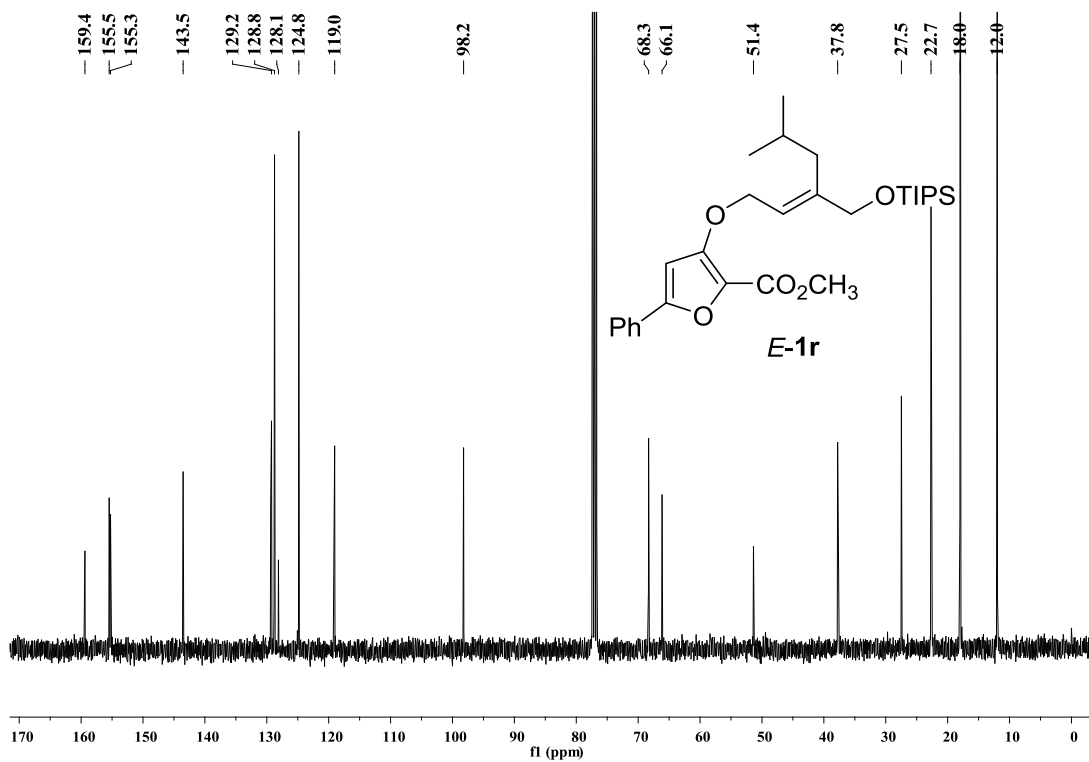

Supplementary Figure 20. <sup>1</sup>H and <sup>13</sup>C spectra for substrate *E-1r*

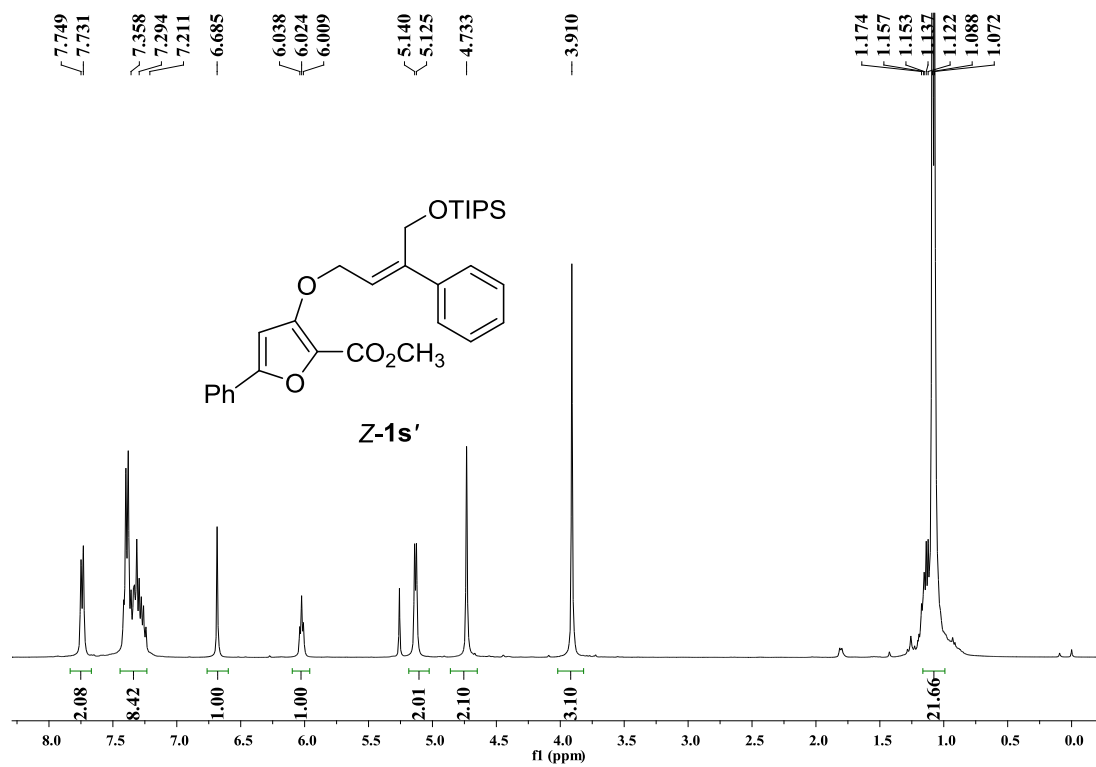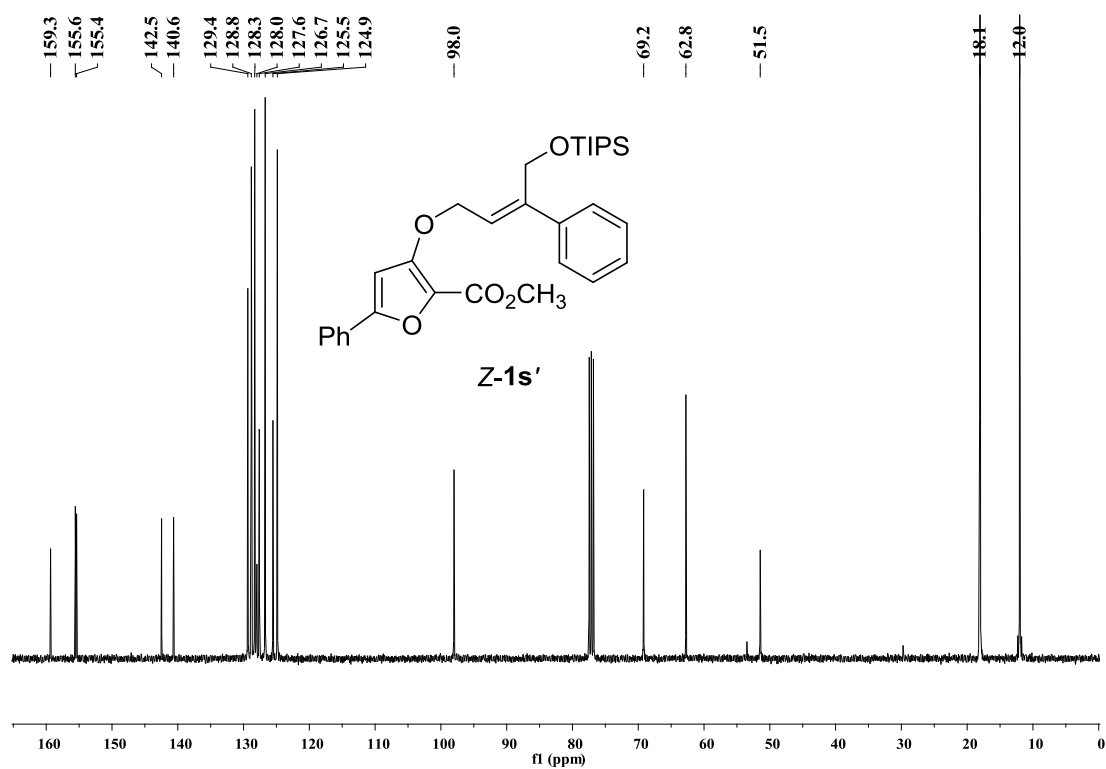

Supplementary Figure 21. <sup>1</sup>H and <sup>13</sup>C spectra for substrate Z-1s'

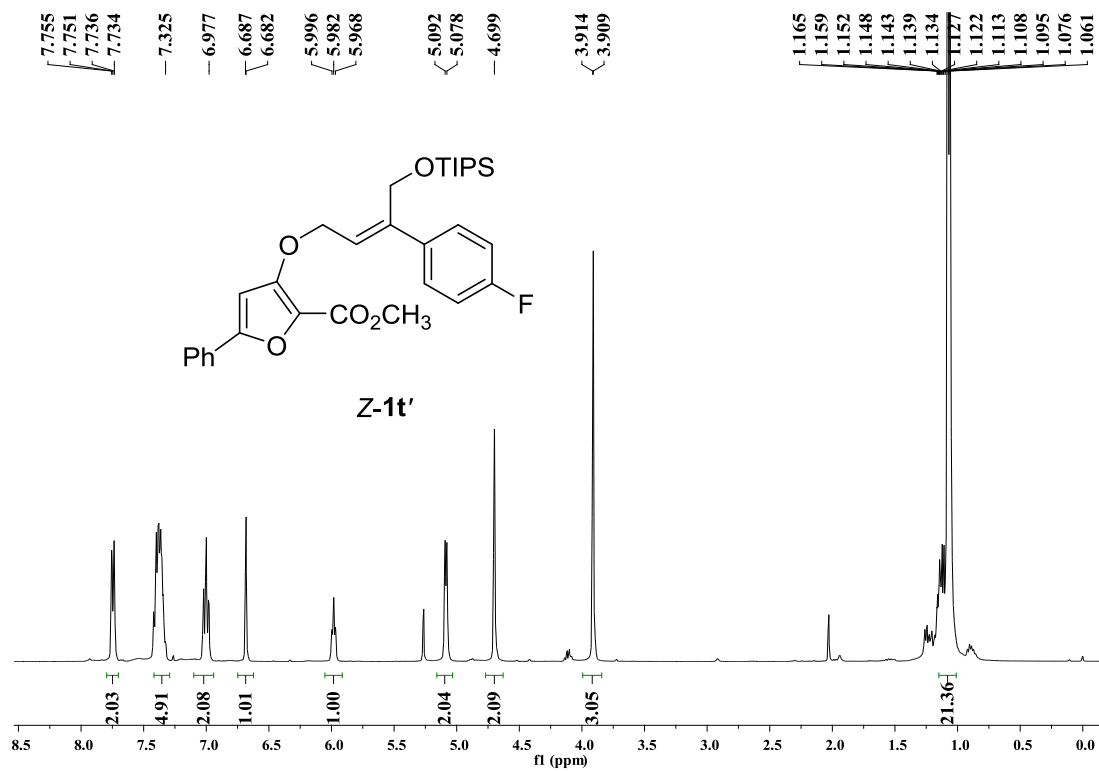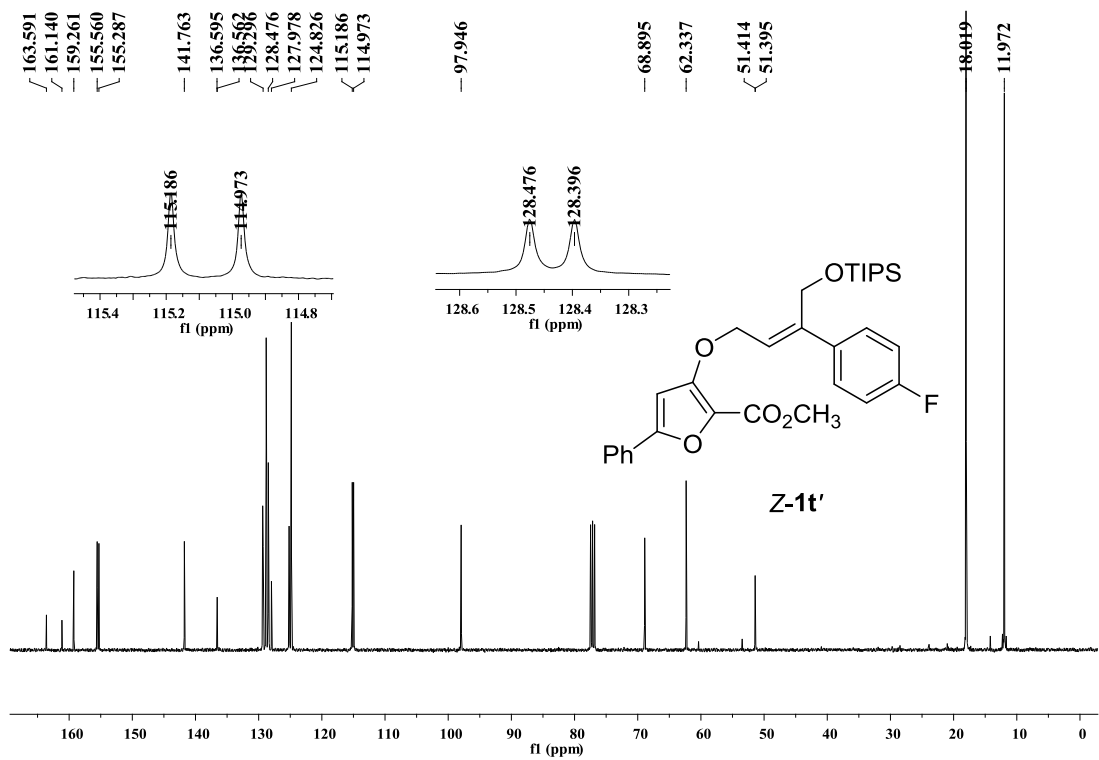

Supplementary Figure 22. <sup>1</sup>H and <sup>13</sup>C spectra for substrate Z-1t'

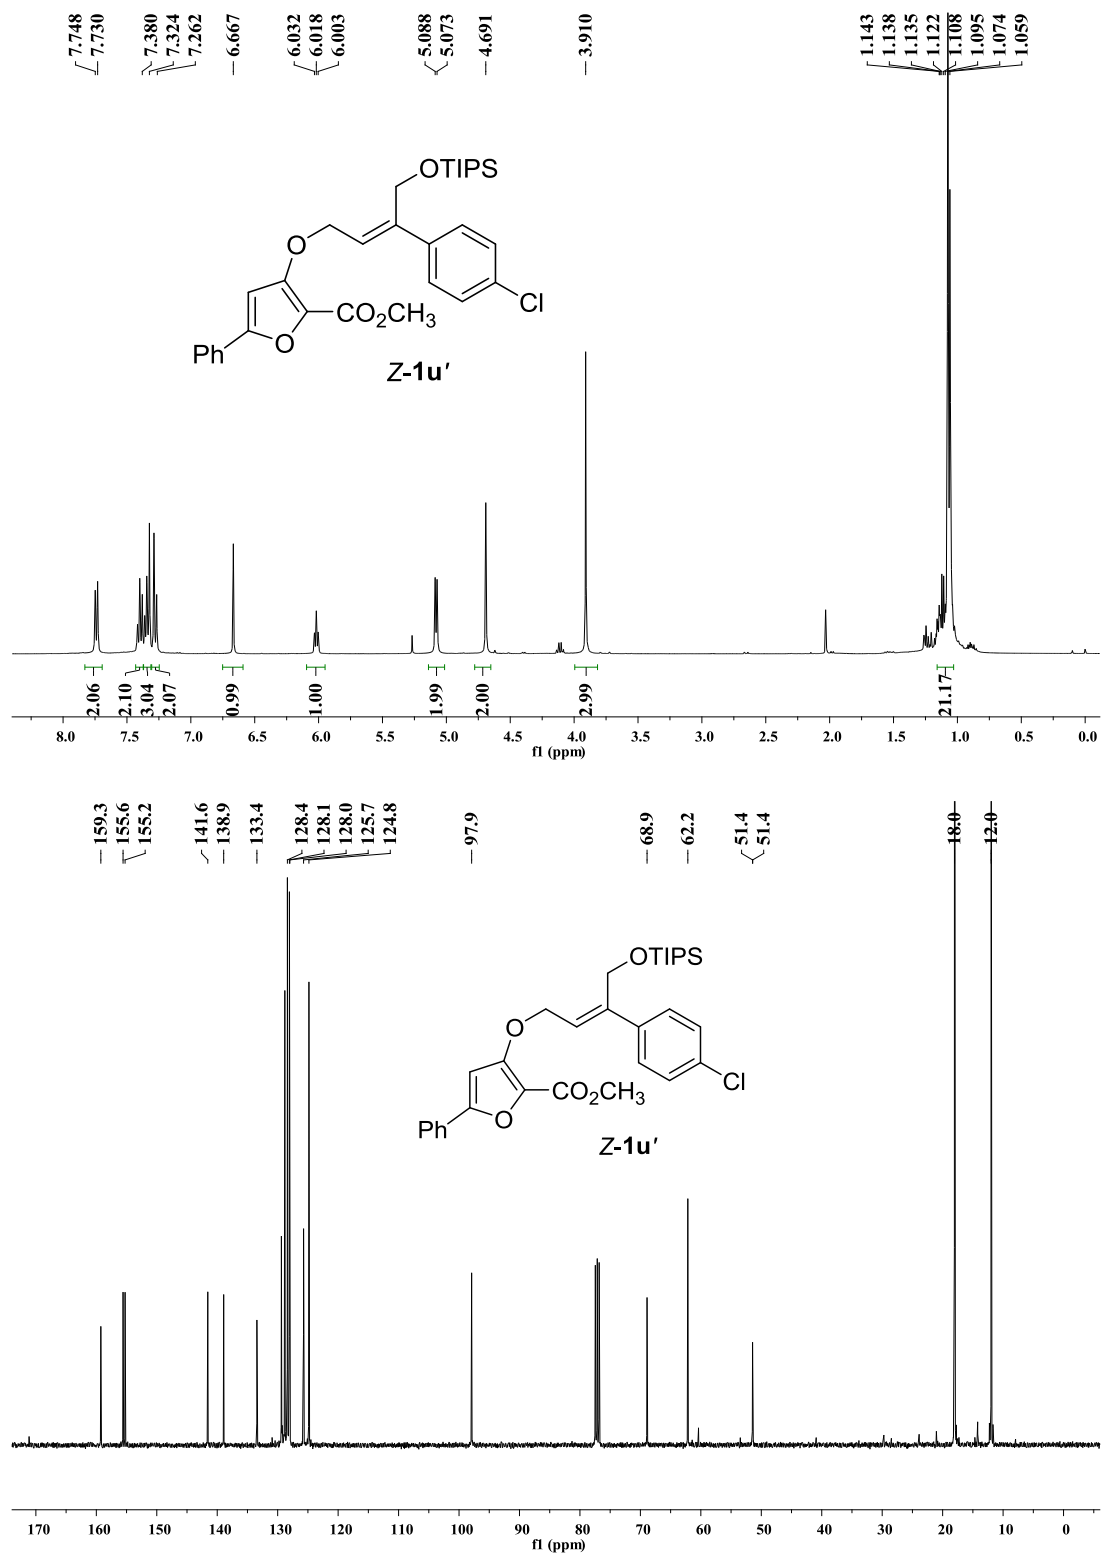

Supplementary Figure 23. <sup>1</sup>H and <sup>13</sup>C spectra for substrate **Z-1u'**

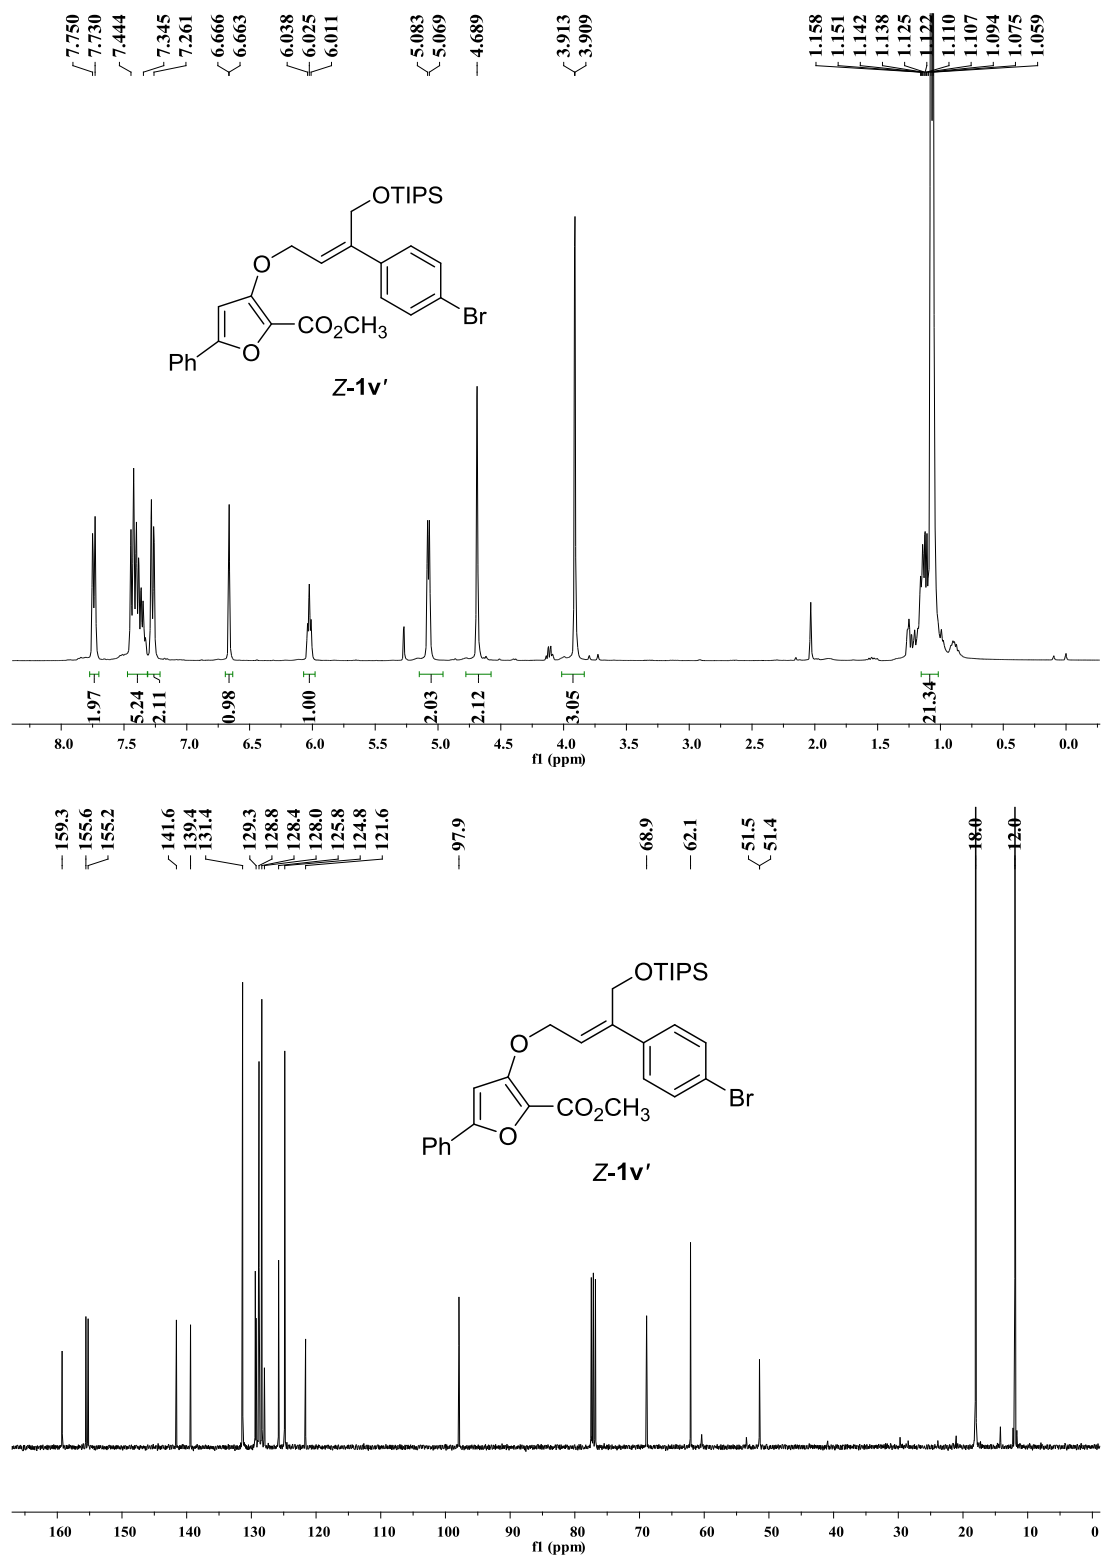

Supplementary Figure 24. <sup>1</sup>H and <sup>13</sup>C spectra for substrate Z-1v'

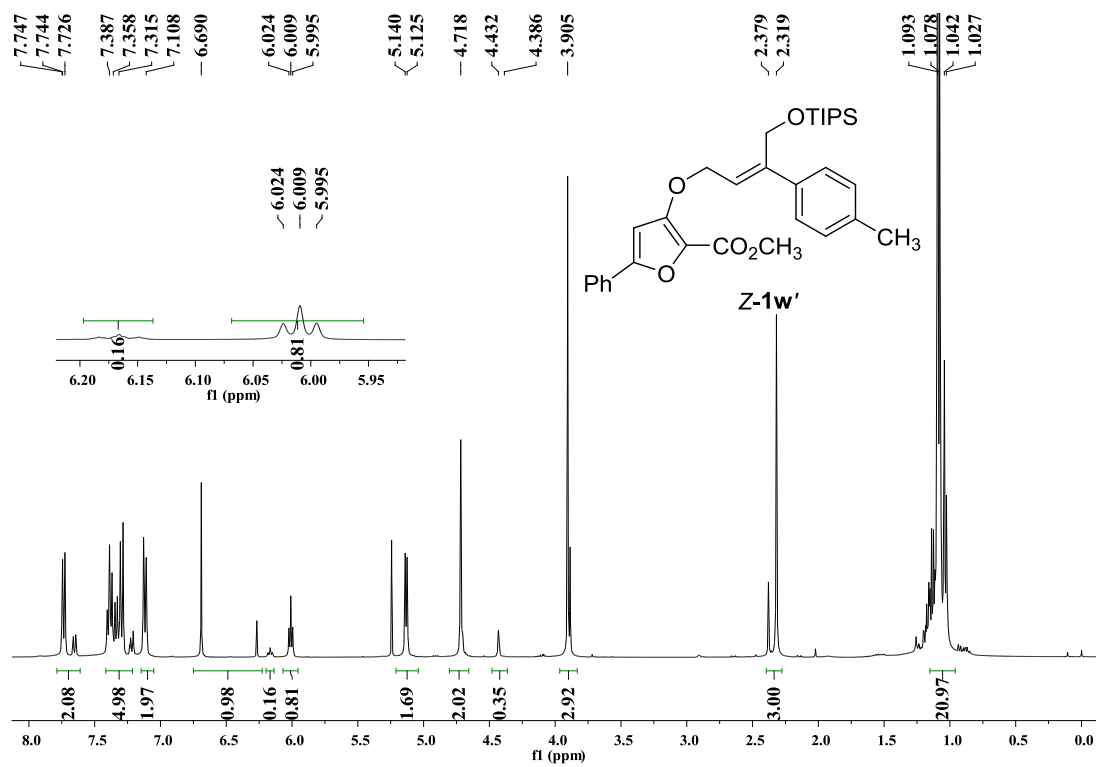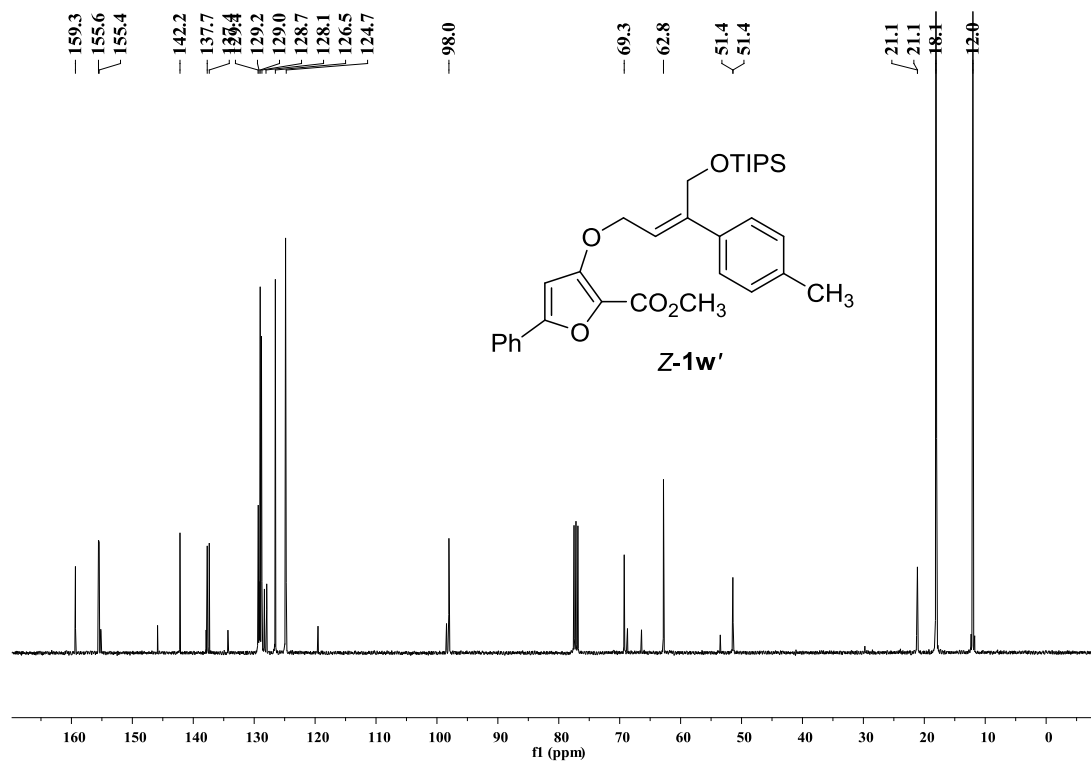

Supplementary Figure 25. <sup>1</sup>H and <sup>13</sup>C spectra for substrate Z-1w'

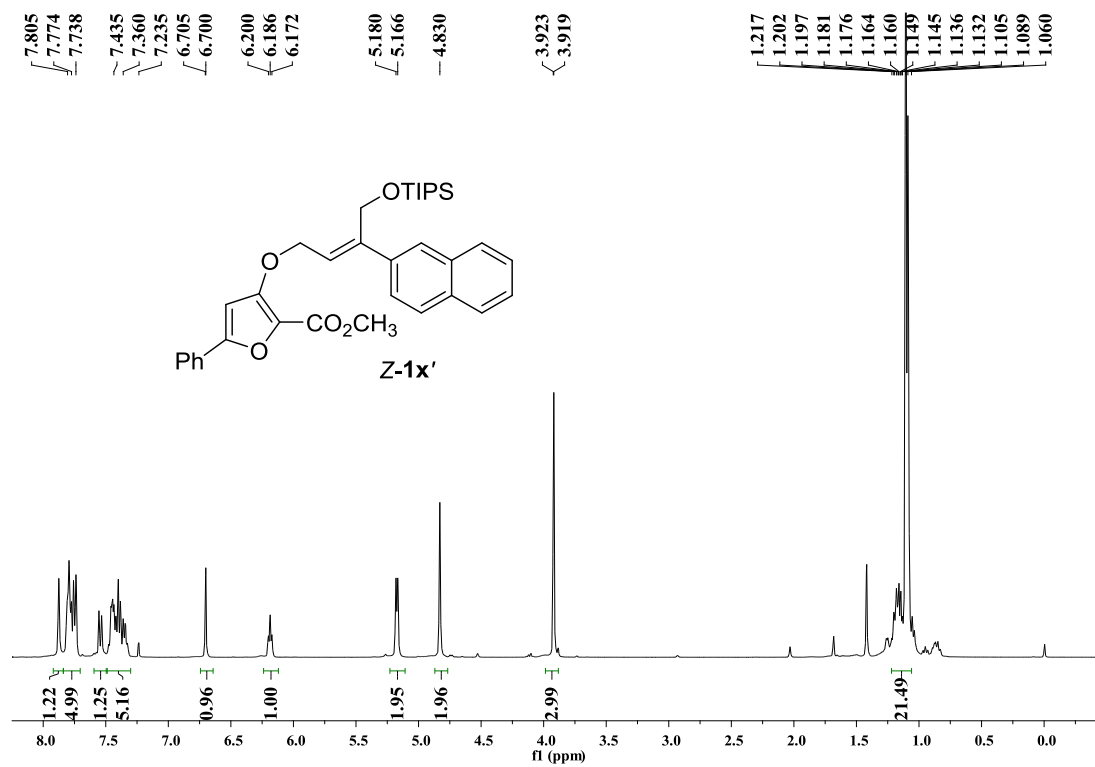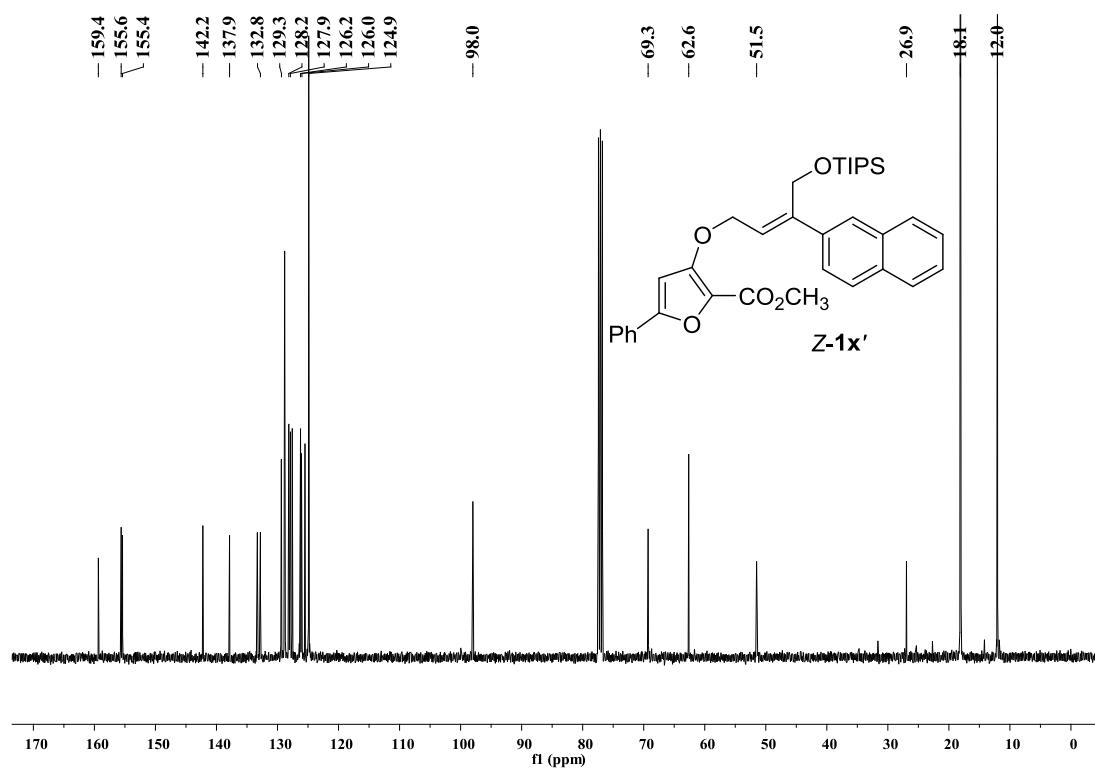

Supplementary Figure 26. <sup>1</sup>H and <sup>13</sup>C spectra for substrate Z-1x'

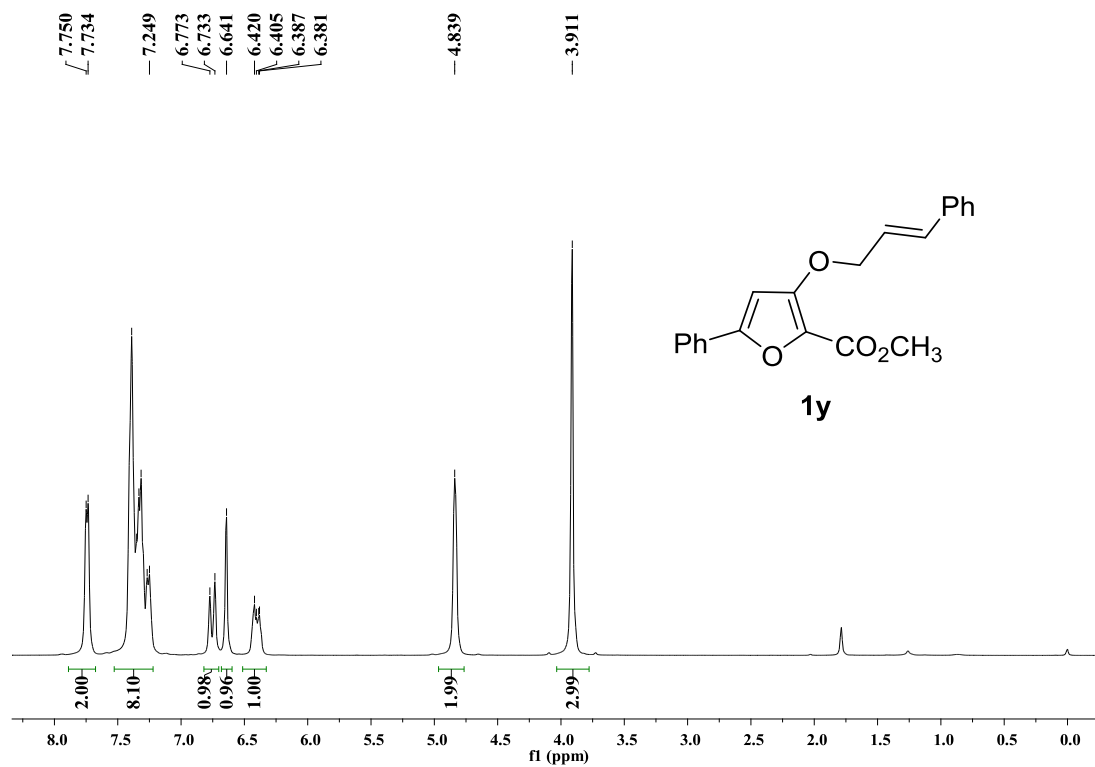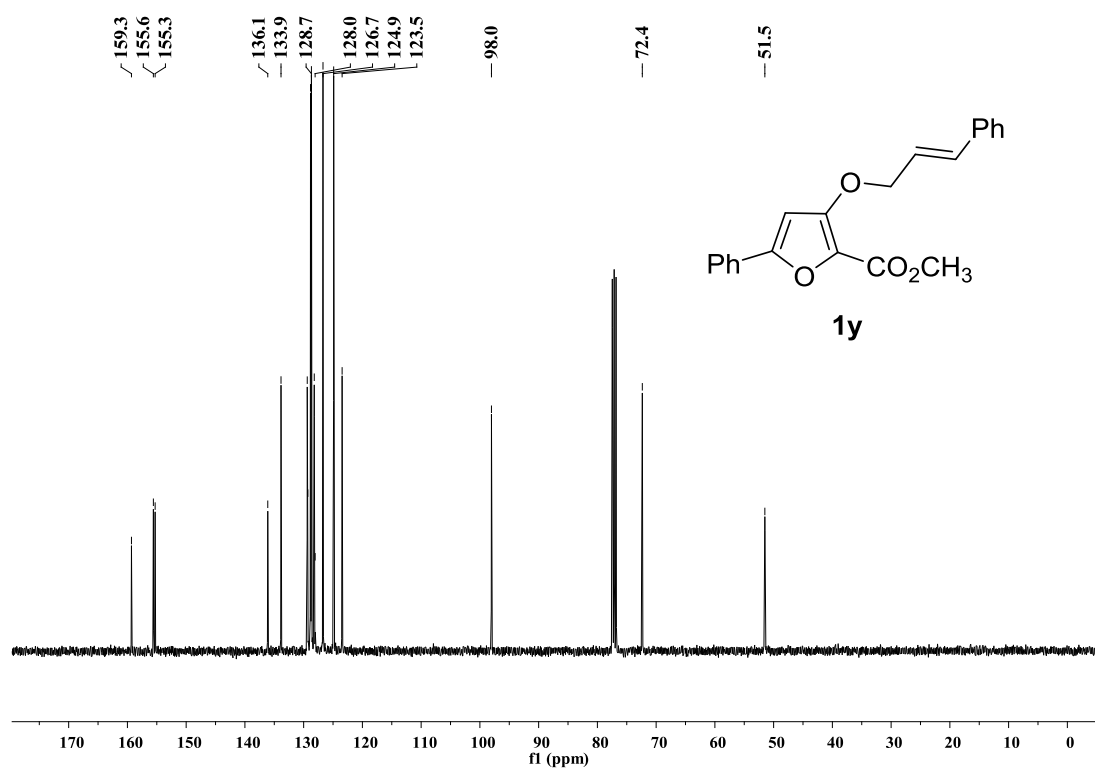

Supplementary Figure 27. <sup>1</sup>H and <sup>13</sup>C spectra for substrate **1y**



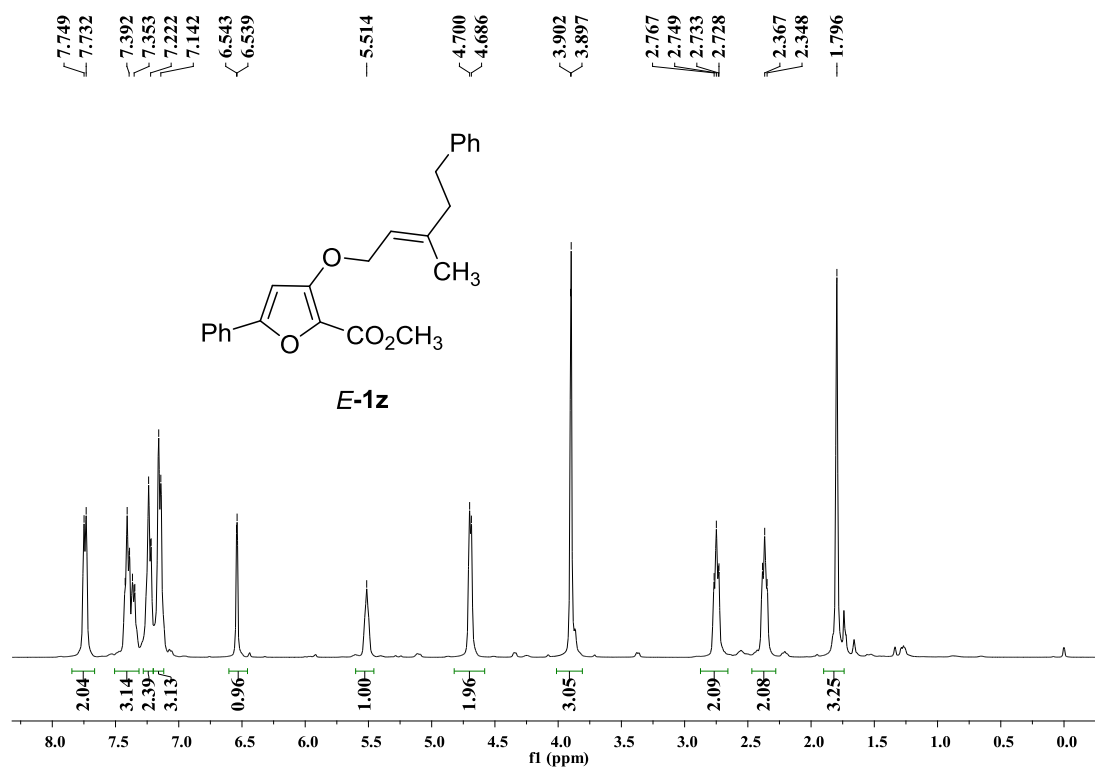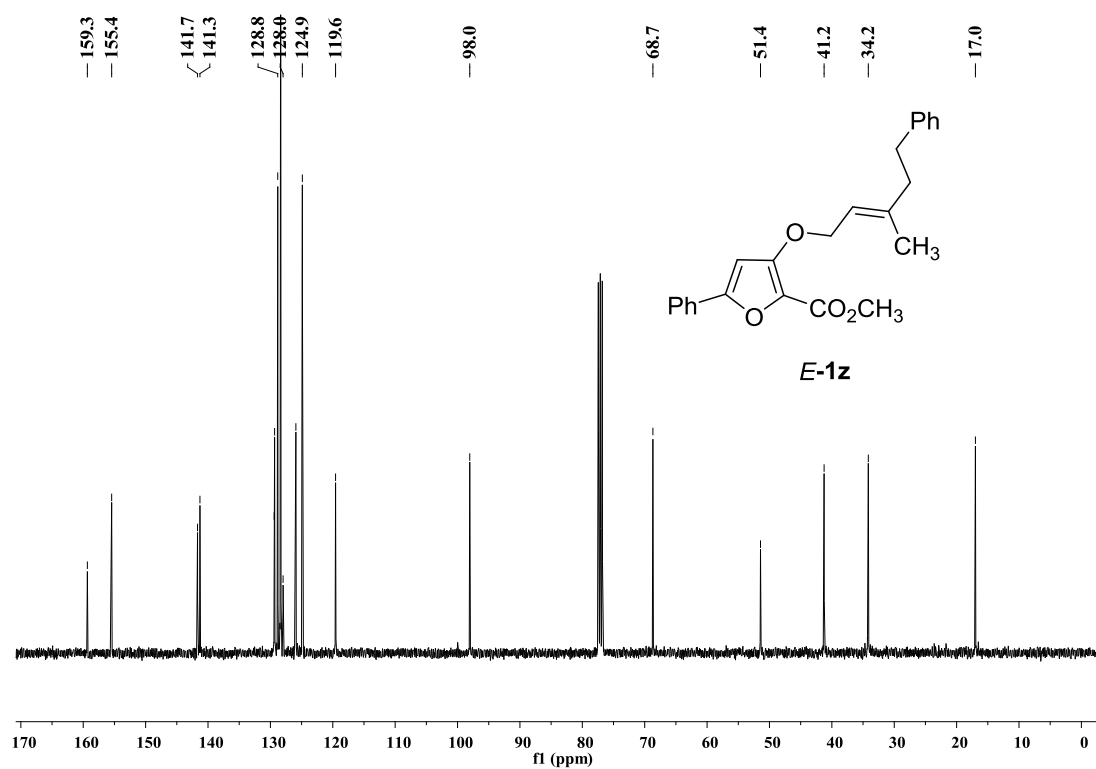

Supplementary Figure 28. <sup>1</sup>H and <sup>13</sup>C spectra for substrate *E-1z*

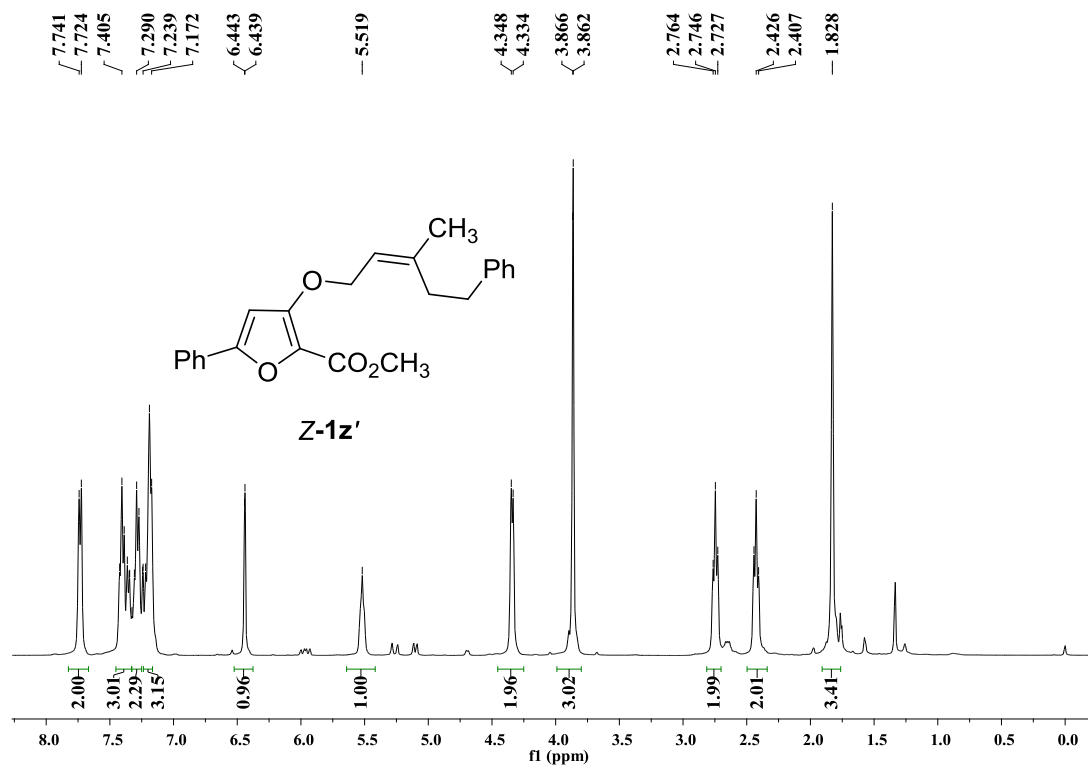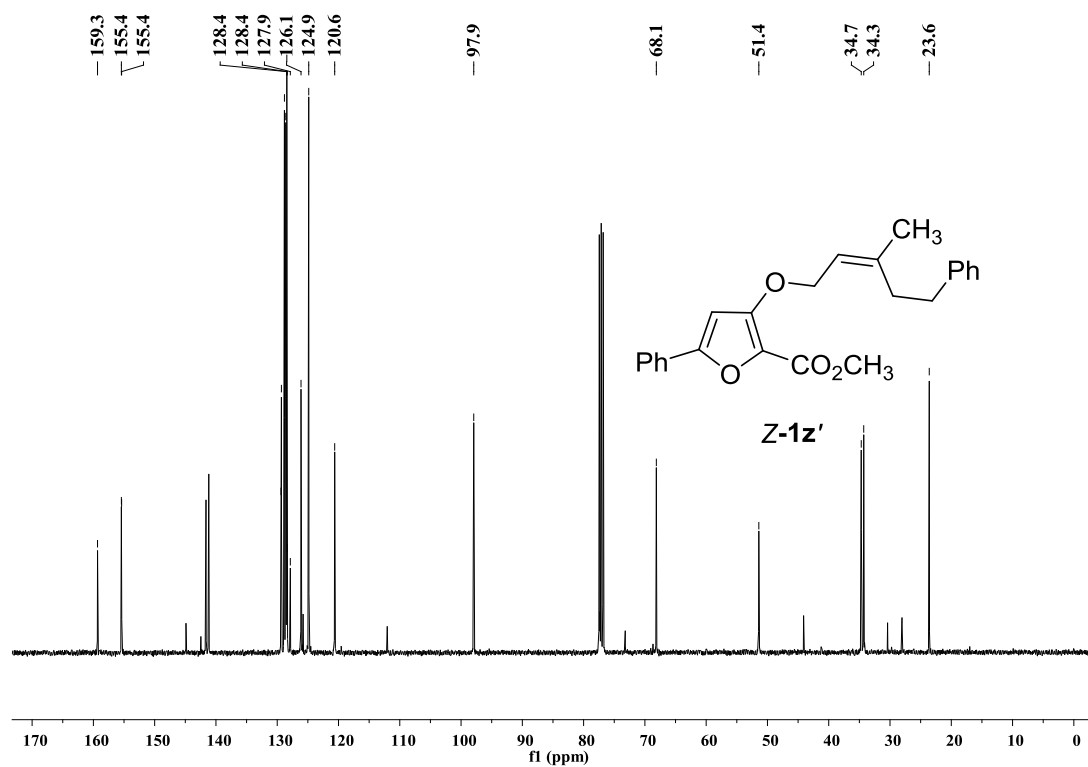

Supplementary Figure 29. <sup>1</sup>H and <sup>13</sup>C spectra for substrate Z-1z'

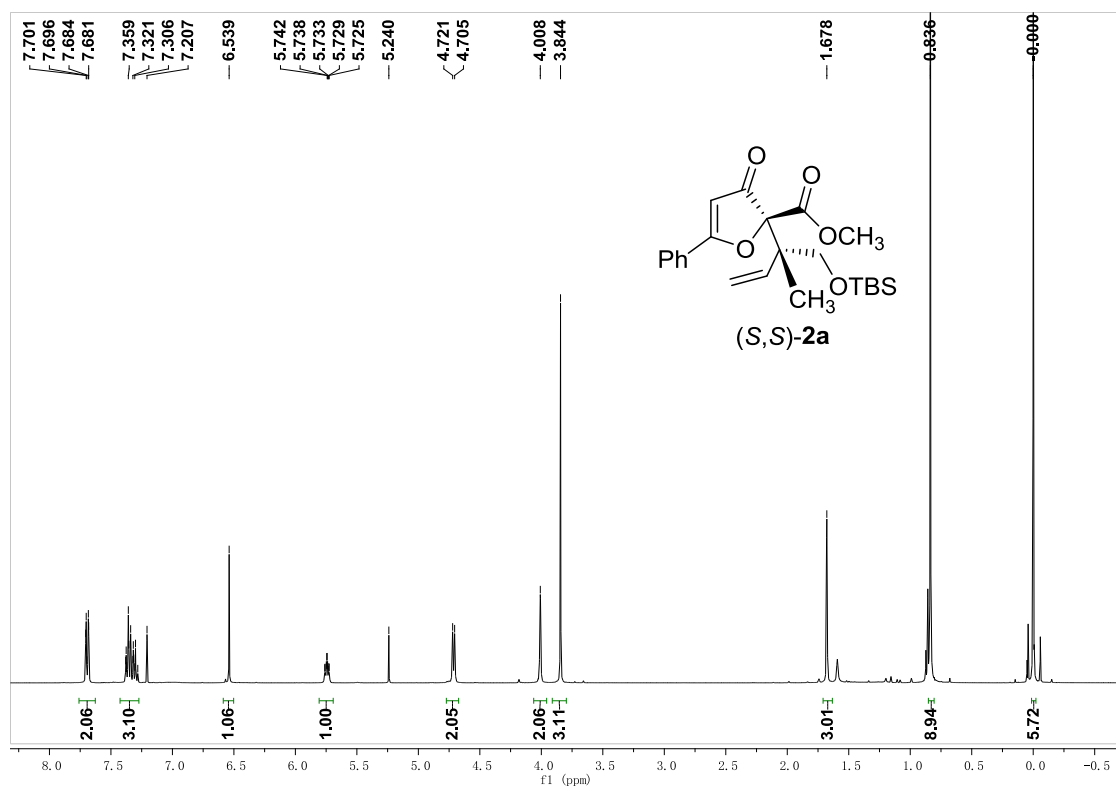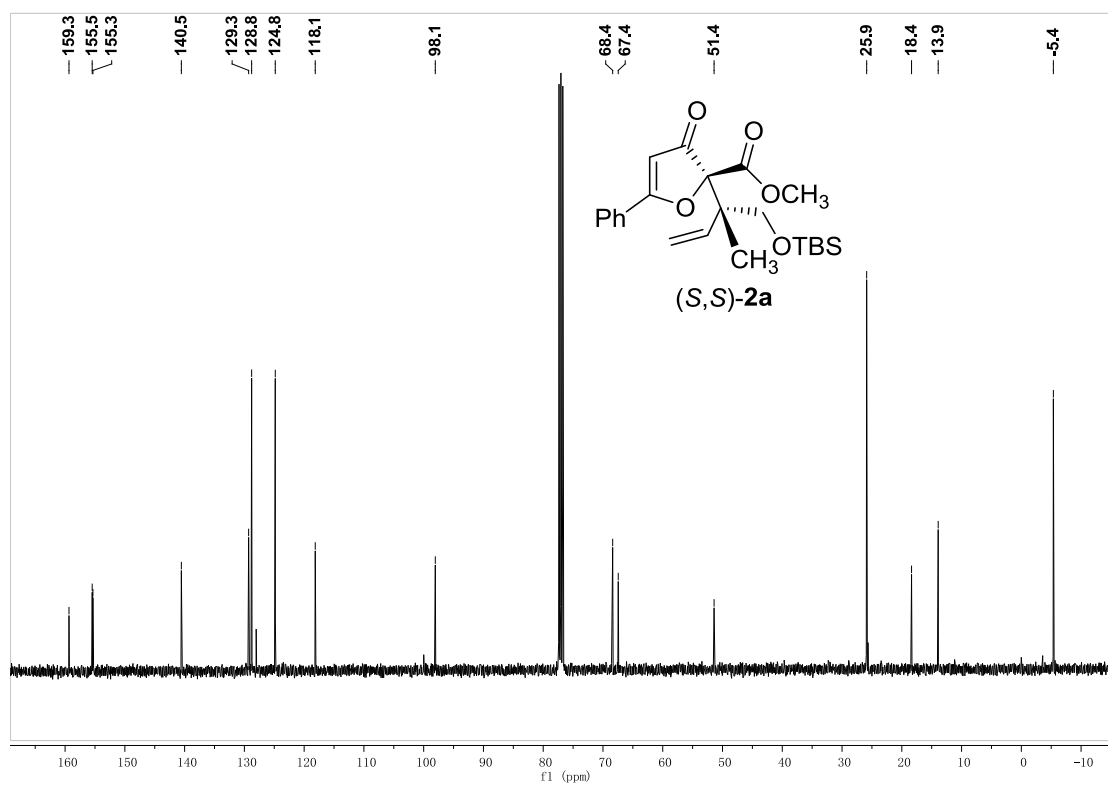

**Supplementary Figure 30.** <sup>1</sup>H and <sup>13</sup>C spectra for product (S,S)-2a

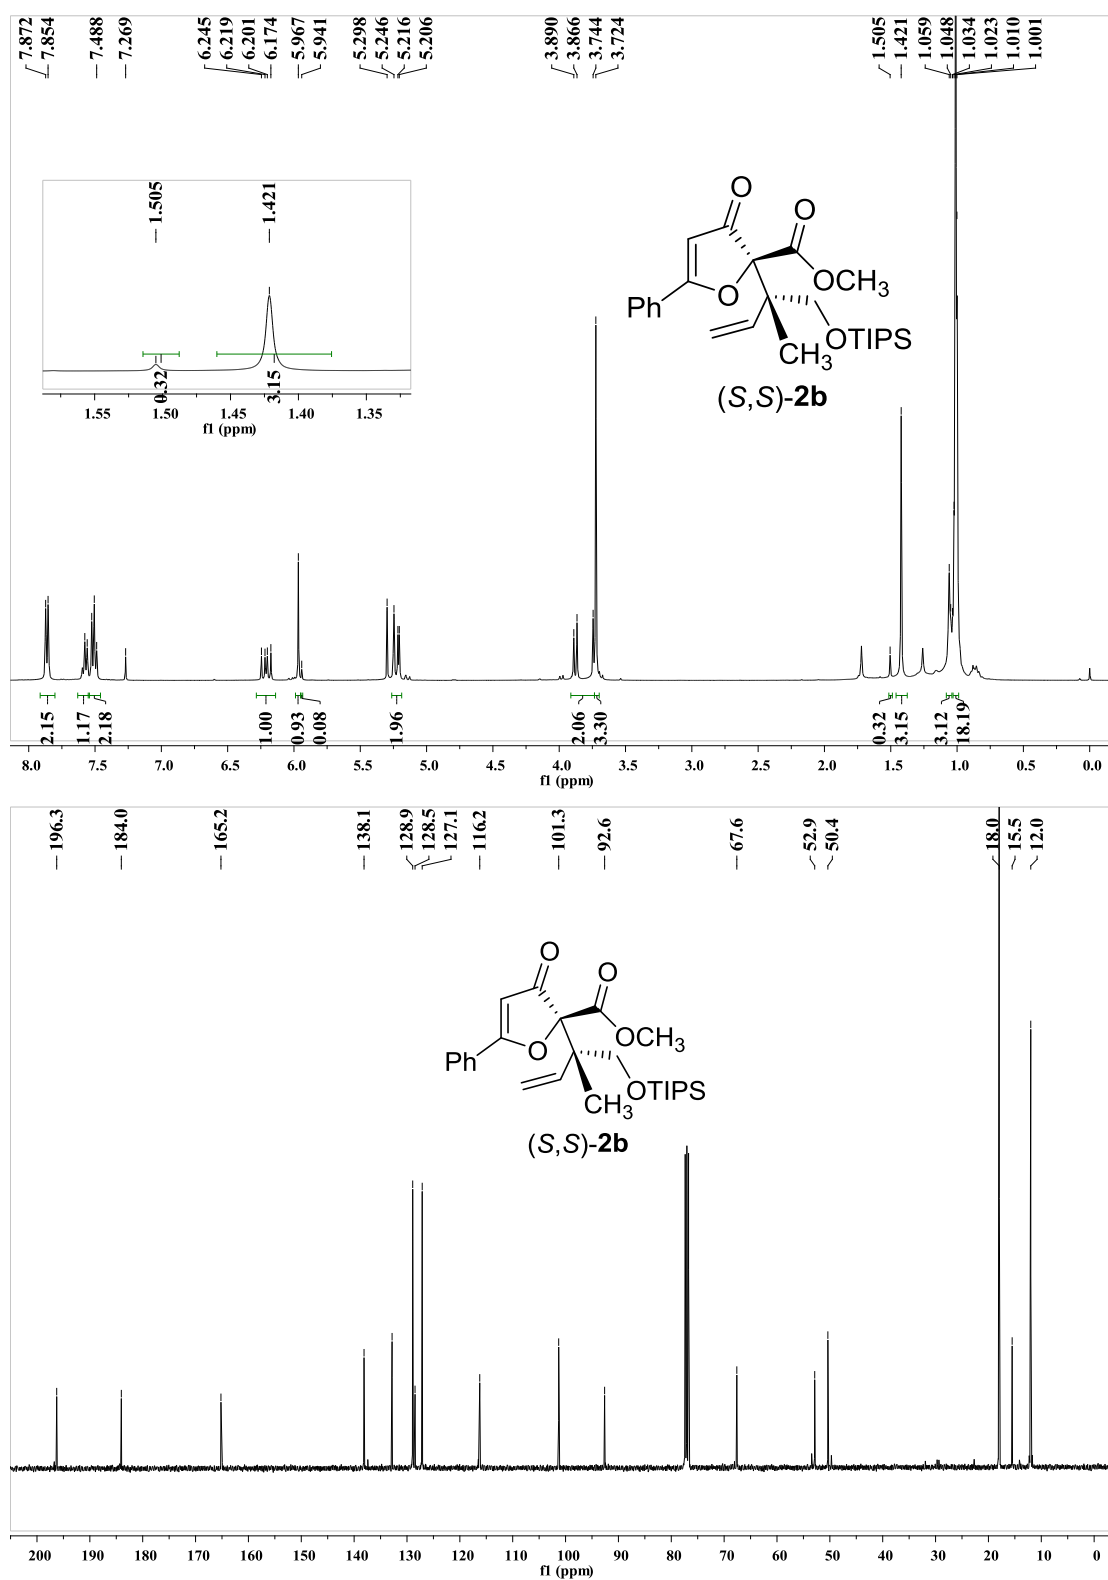

Supplementary Figure 31. <sup>1</sup>H and <sup>13</sup>C spectra for product (S,S)-2b

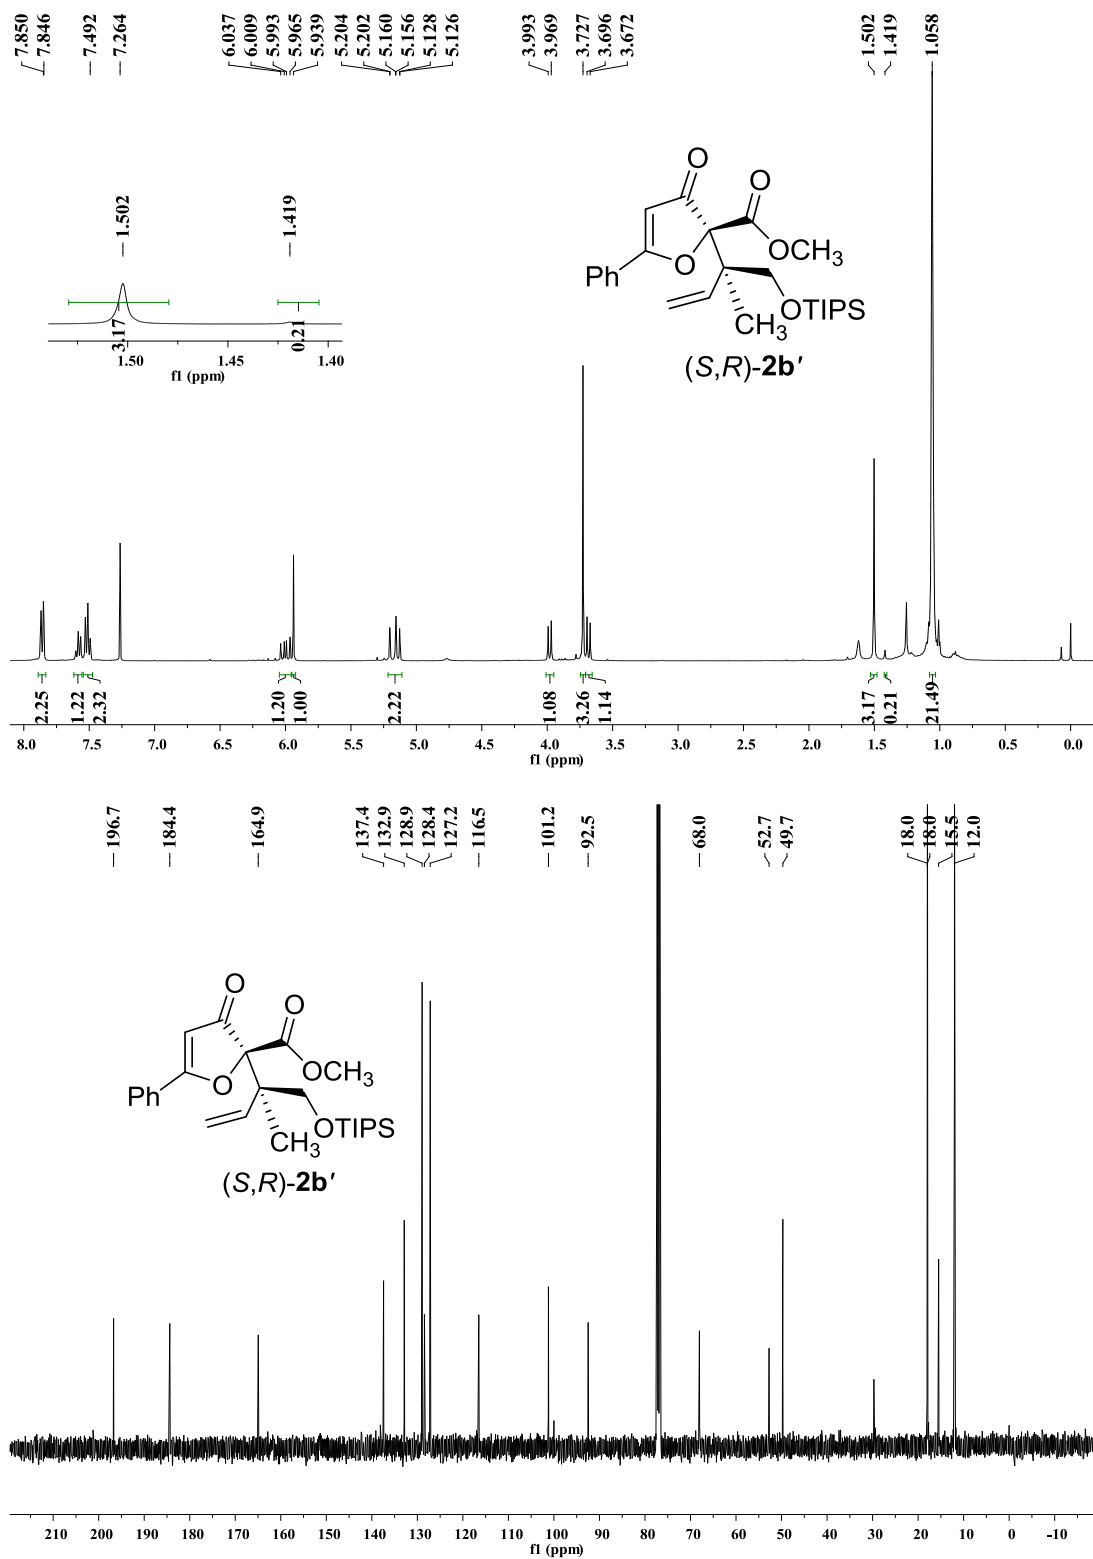

Supplementary Figure 32. <sup>1</sup>H and <sup>13</sup>C spectra for product (S,R)-2b'

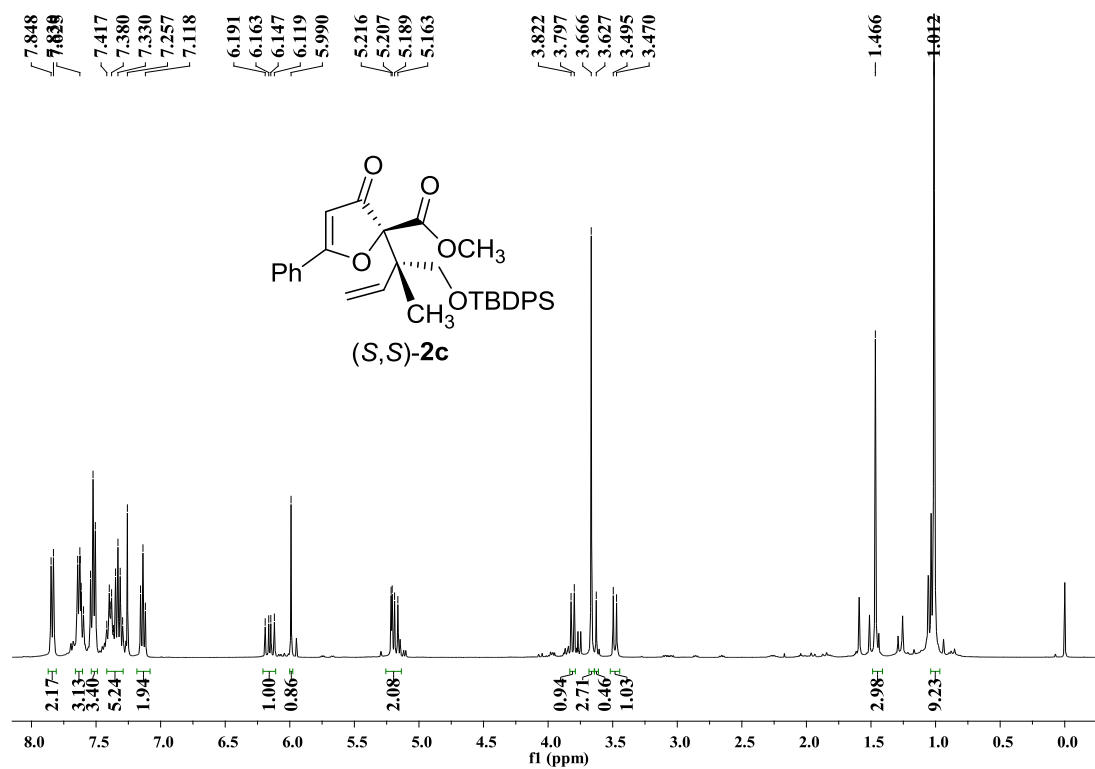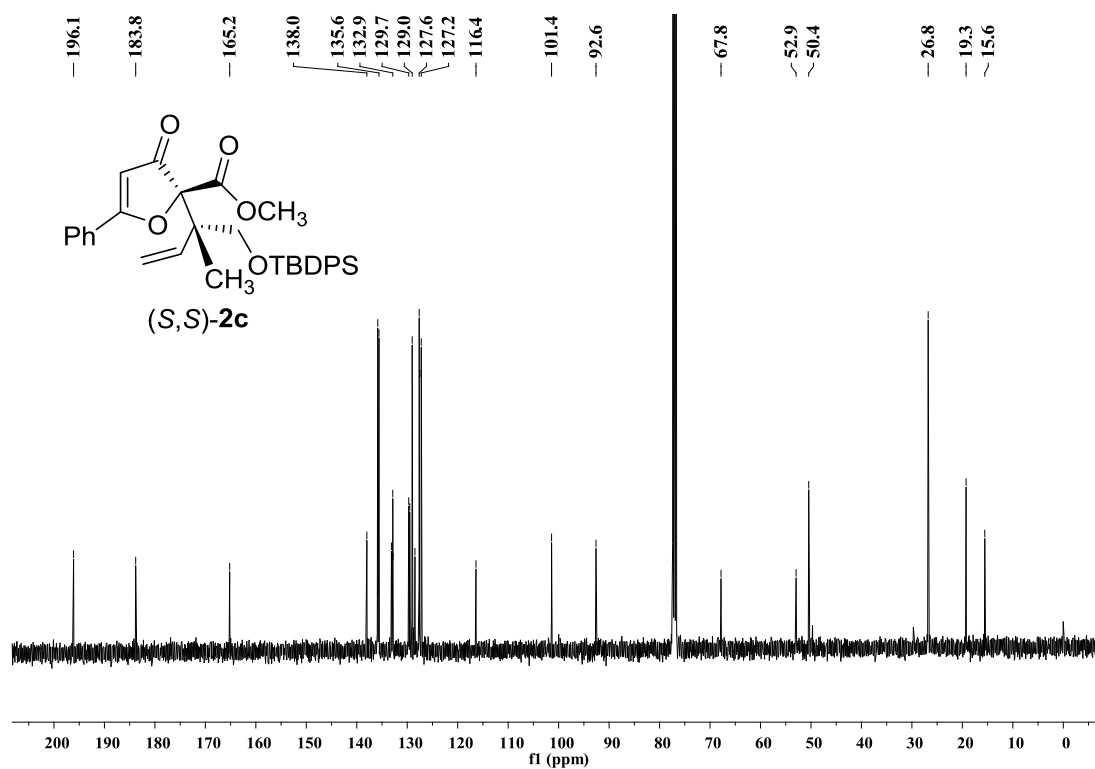

Supplementary Figure 33. <sup>1</sup>H and <sup>13</sup>C spectra for product (S,S)-2c

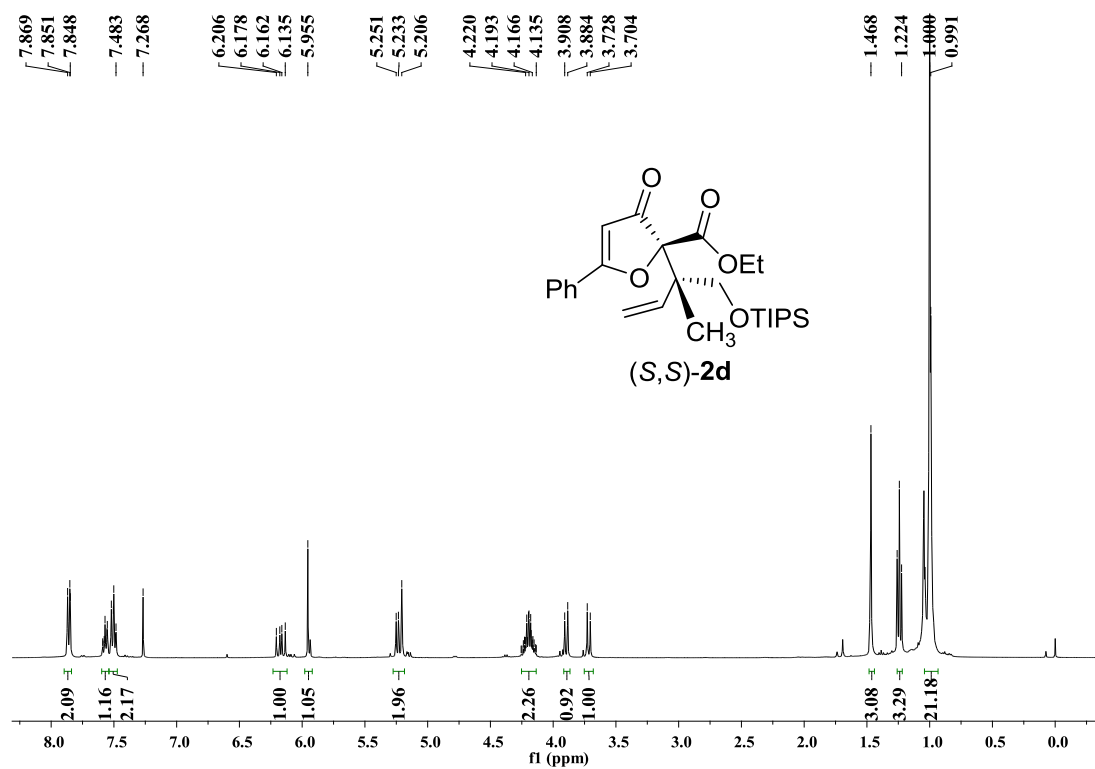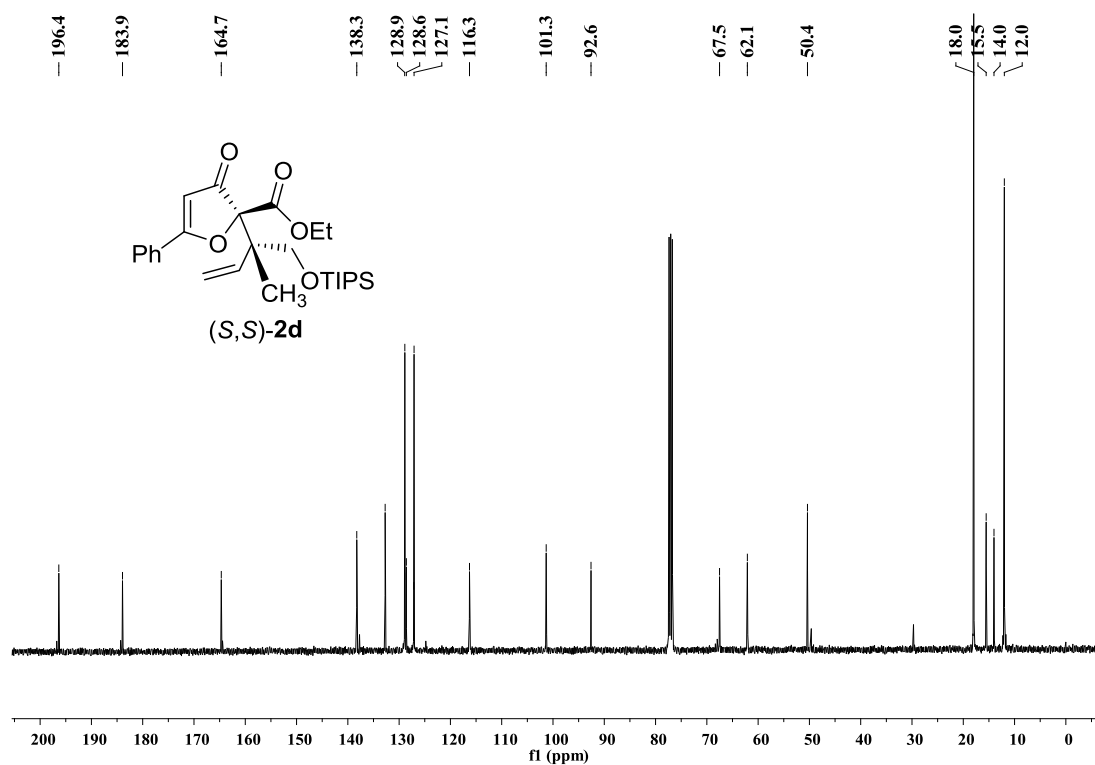

Supplementary Figure 34. <sup>1</sup>H and <sup>13</sup>C spectra for product (S,S)-2d

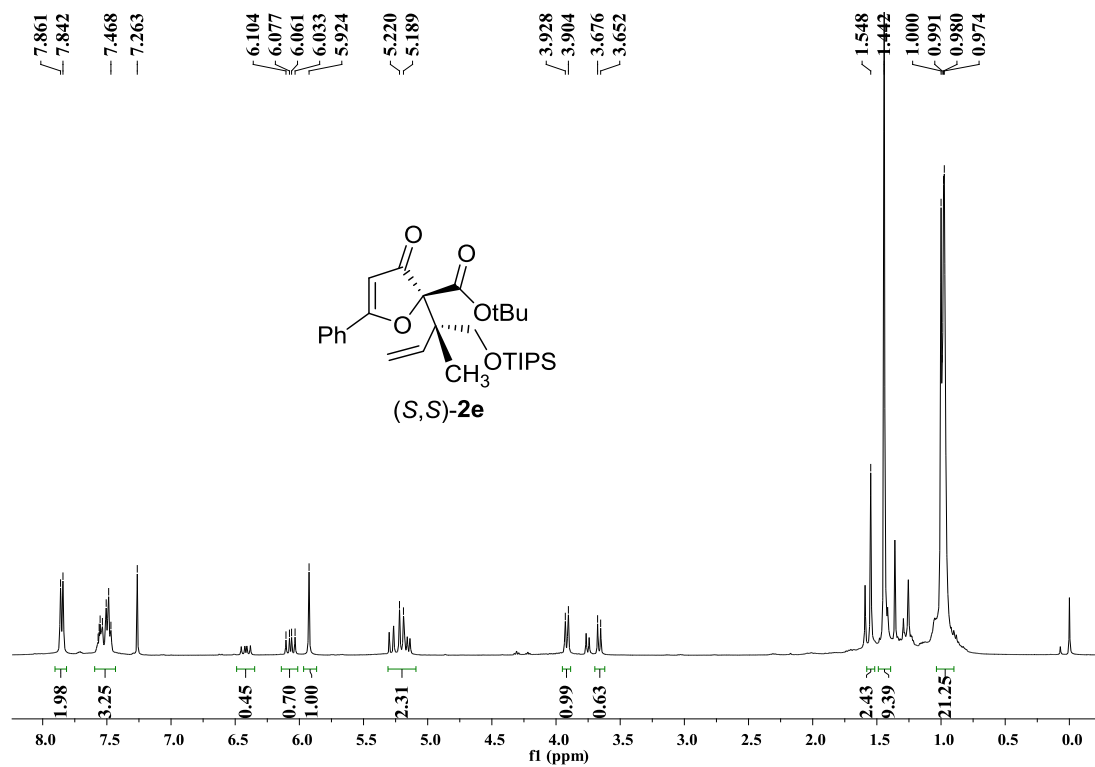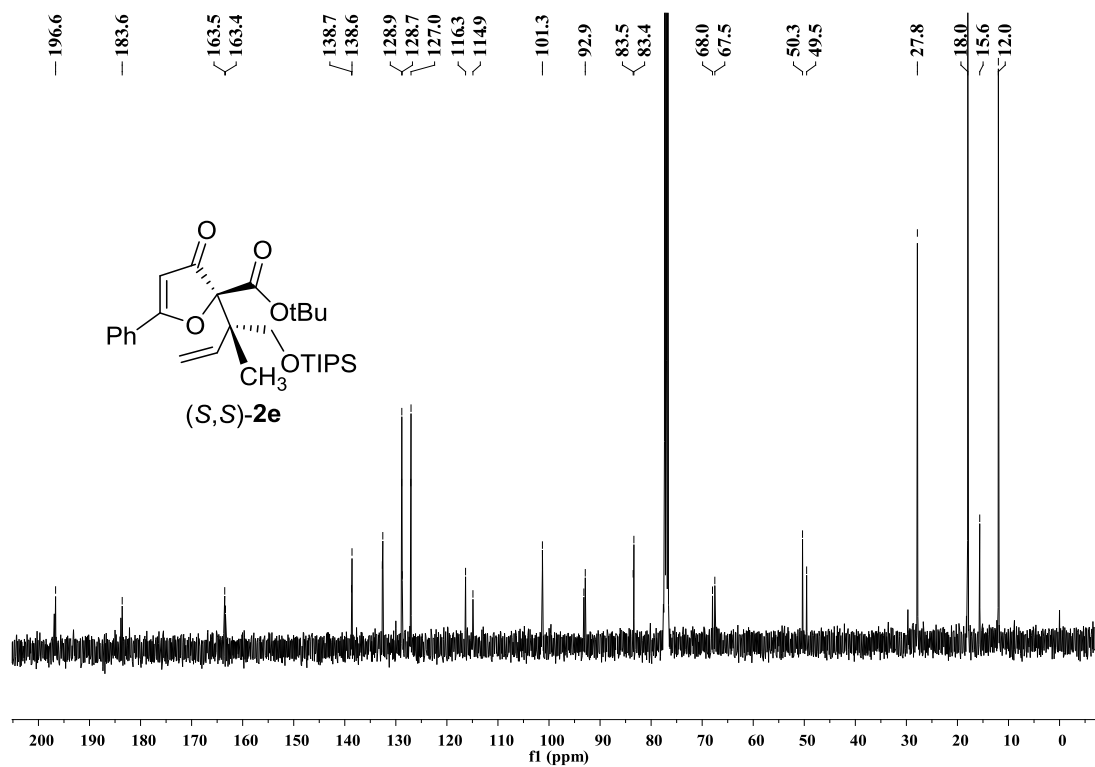

Supplementary Figure 35. <sup>1</sup>H and <sup>13</sup>C spectra for product (S,S)-2e



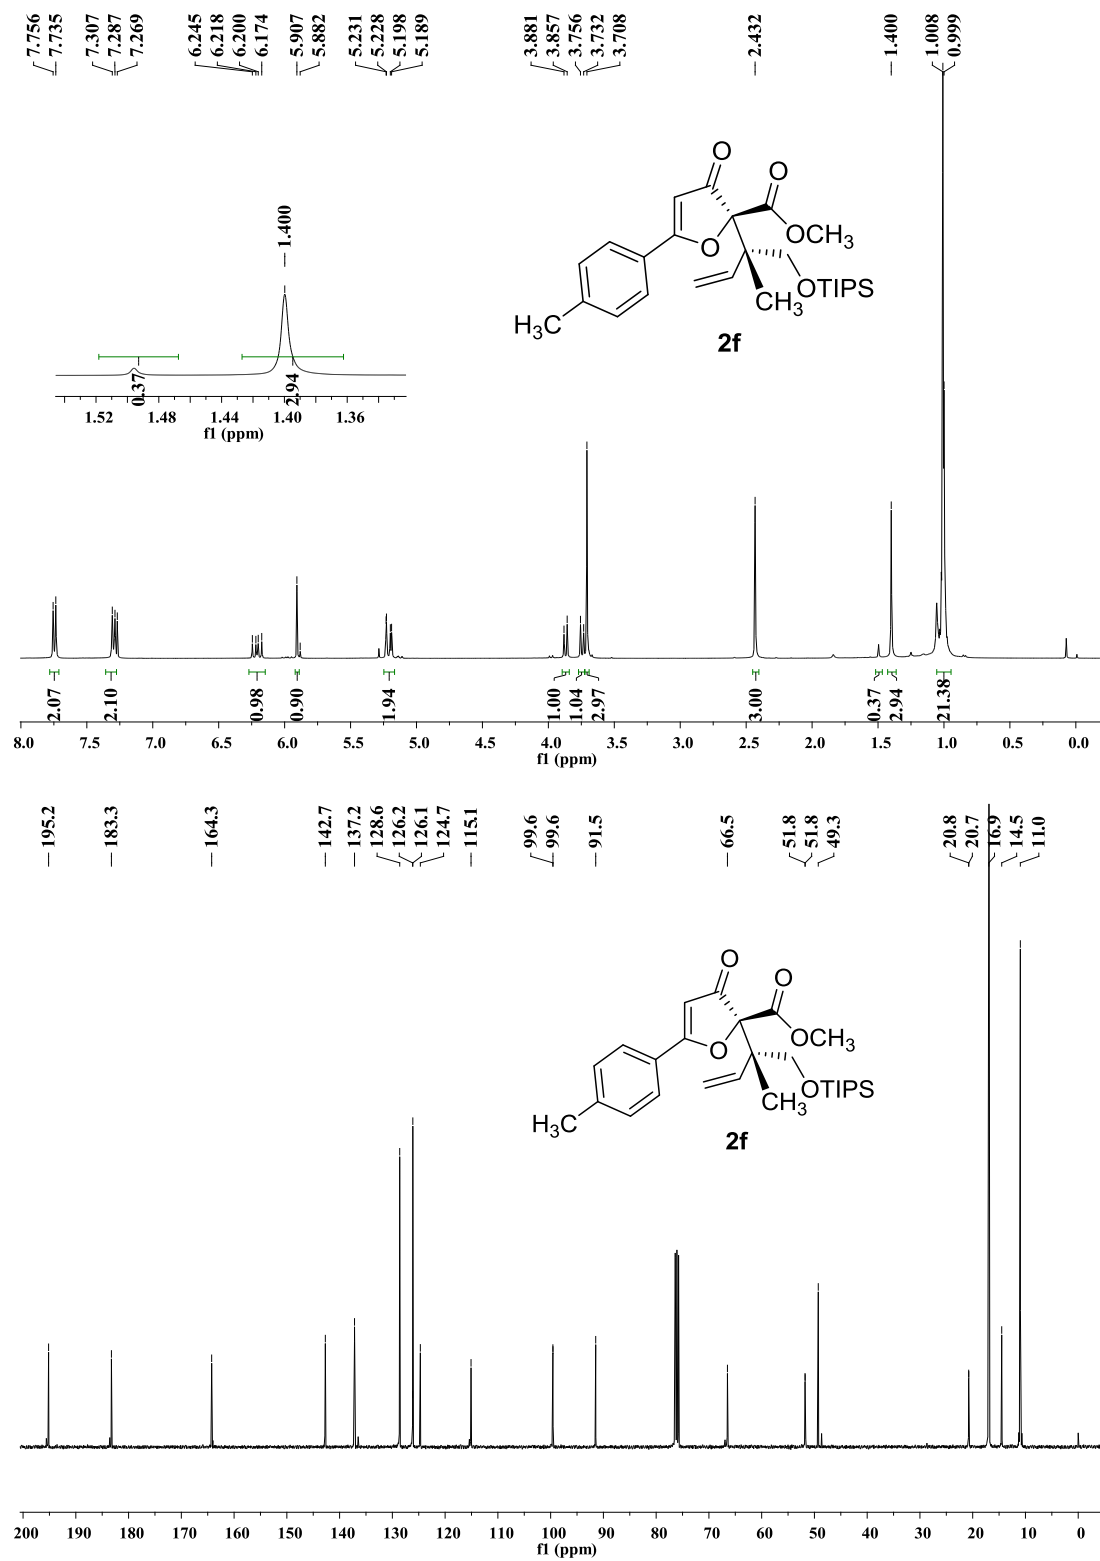

Supplementary Figure 36. <sup>1</sup>H and <sup>13</sup>C spectra for product 2f

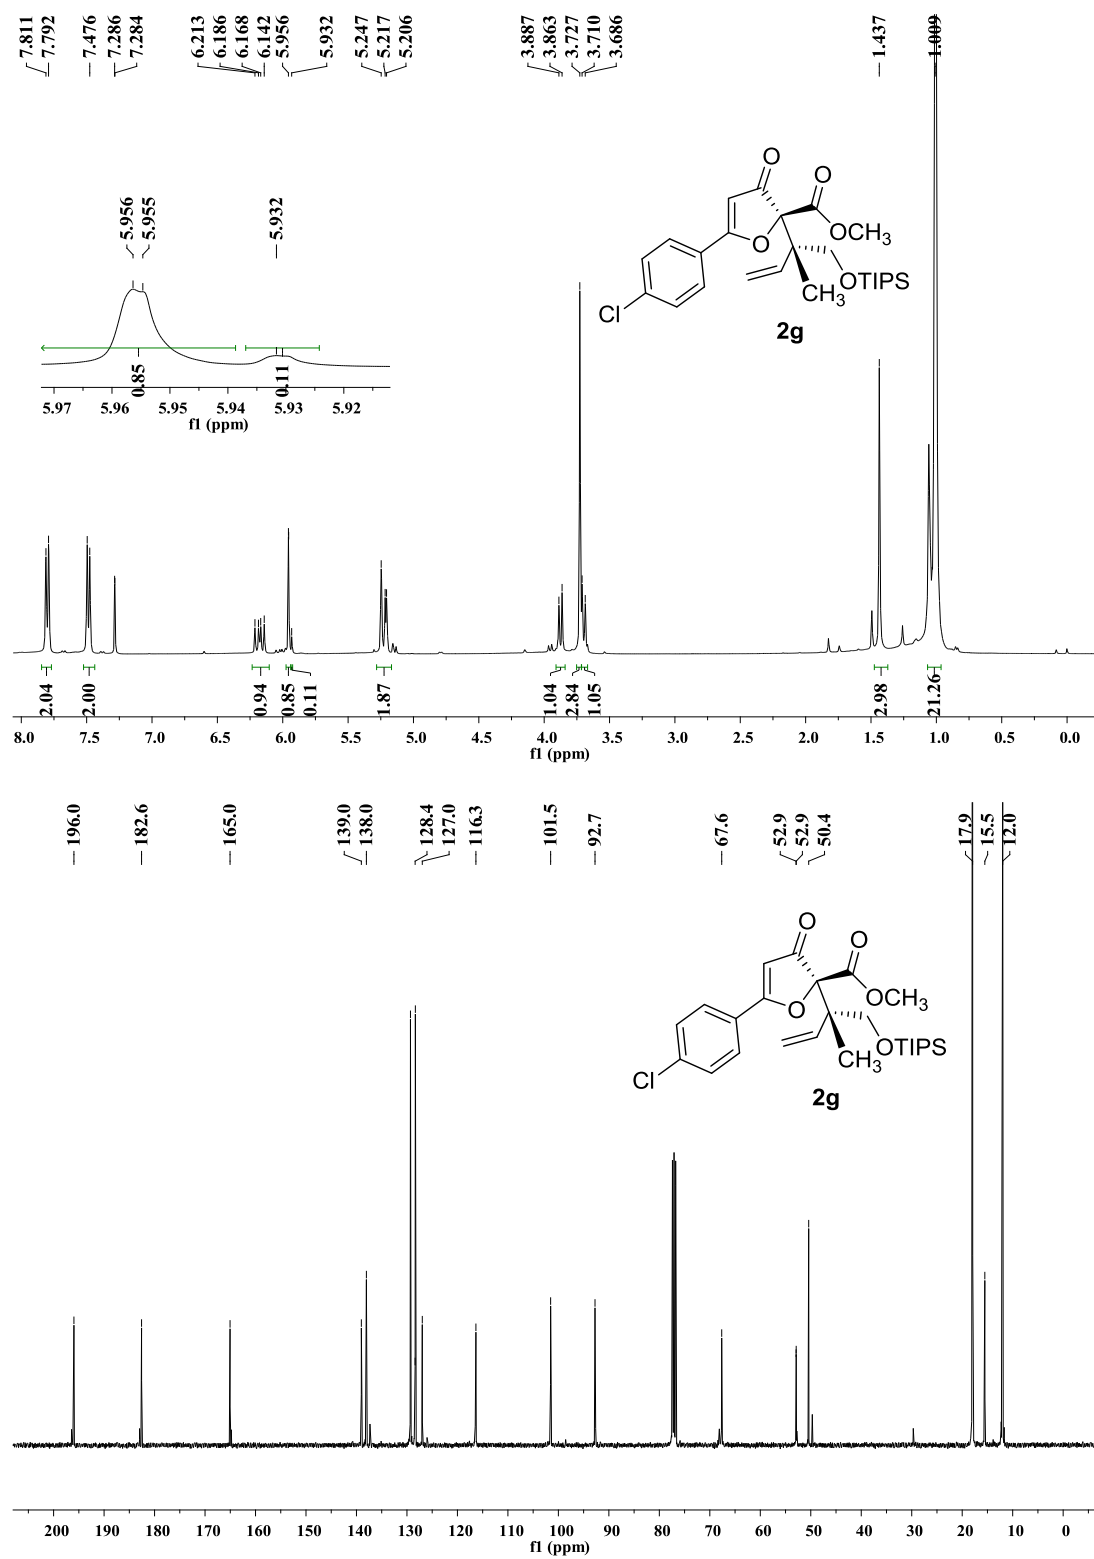

Supplementary Figure 37. <sup>1</sup>H and <sup>13</sup>C spectra for product **2g**

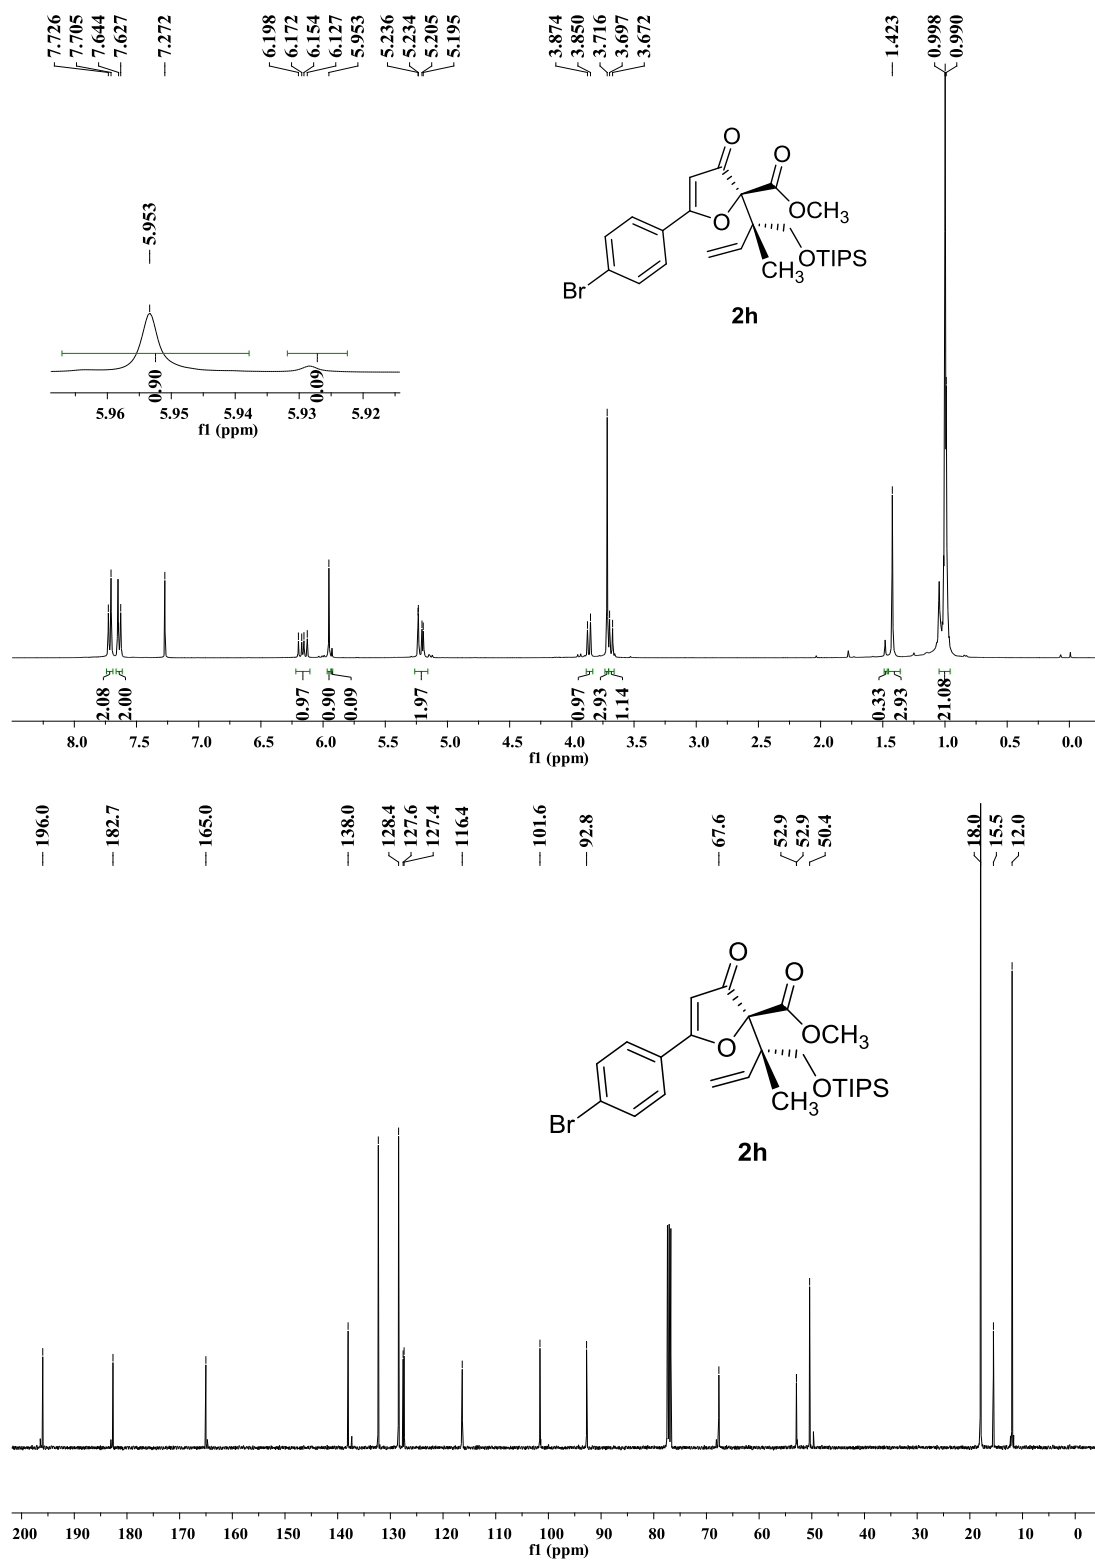

Supplementary Figure 38. <sup>1</sup>H and <sup>13</sup>C spectra for product 2h

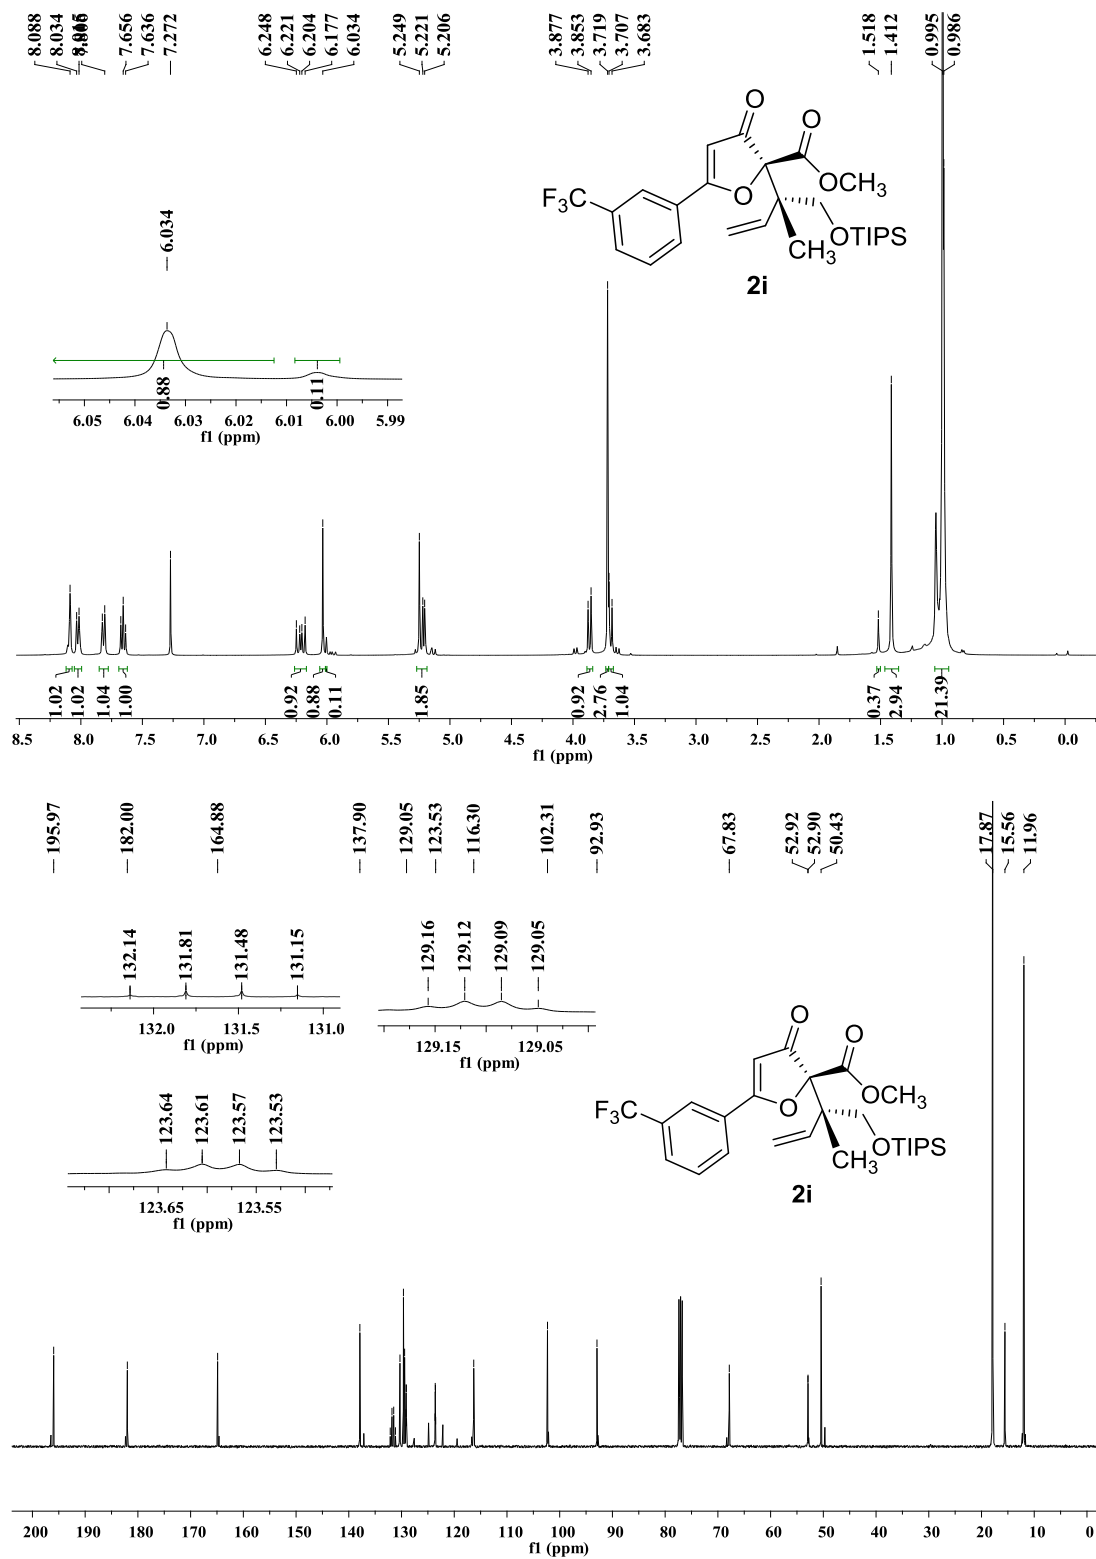

Supplementary Figure 39. <sup>1</sup>H and <sup>13</sup>C spectra for product 2i

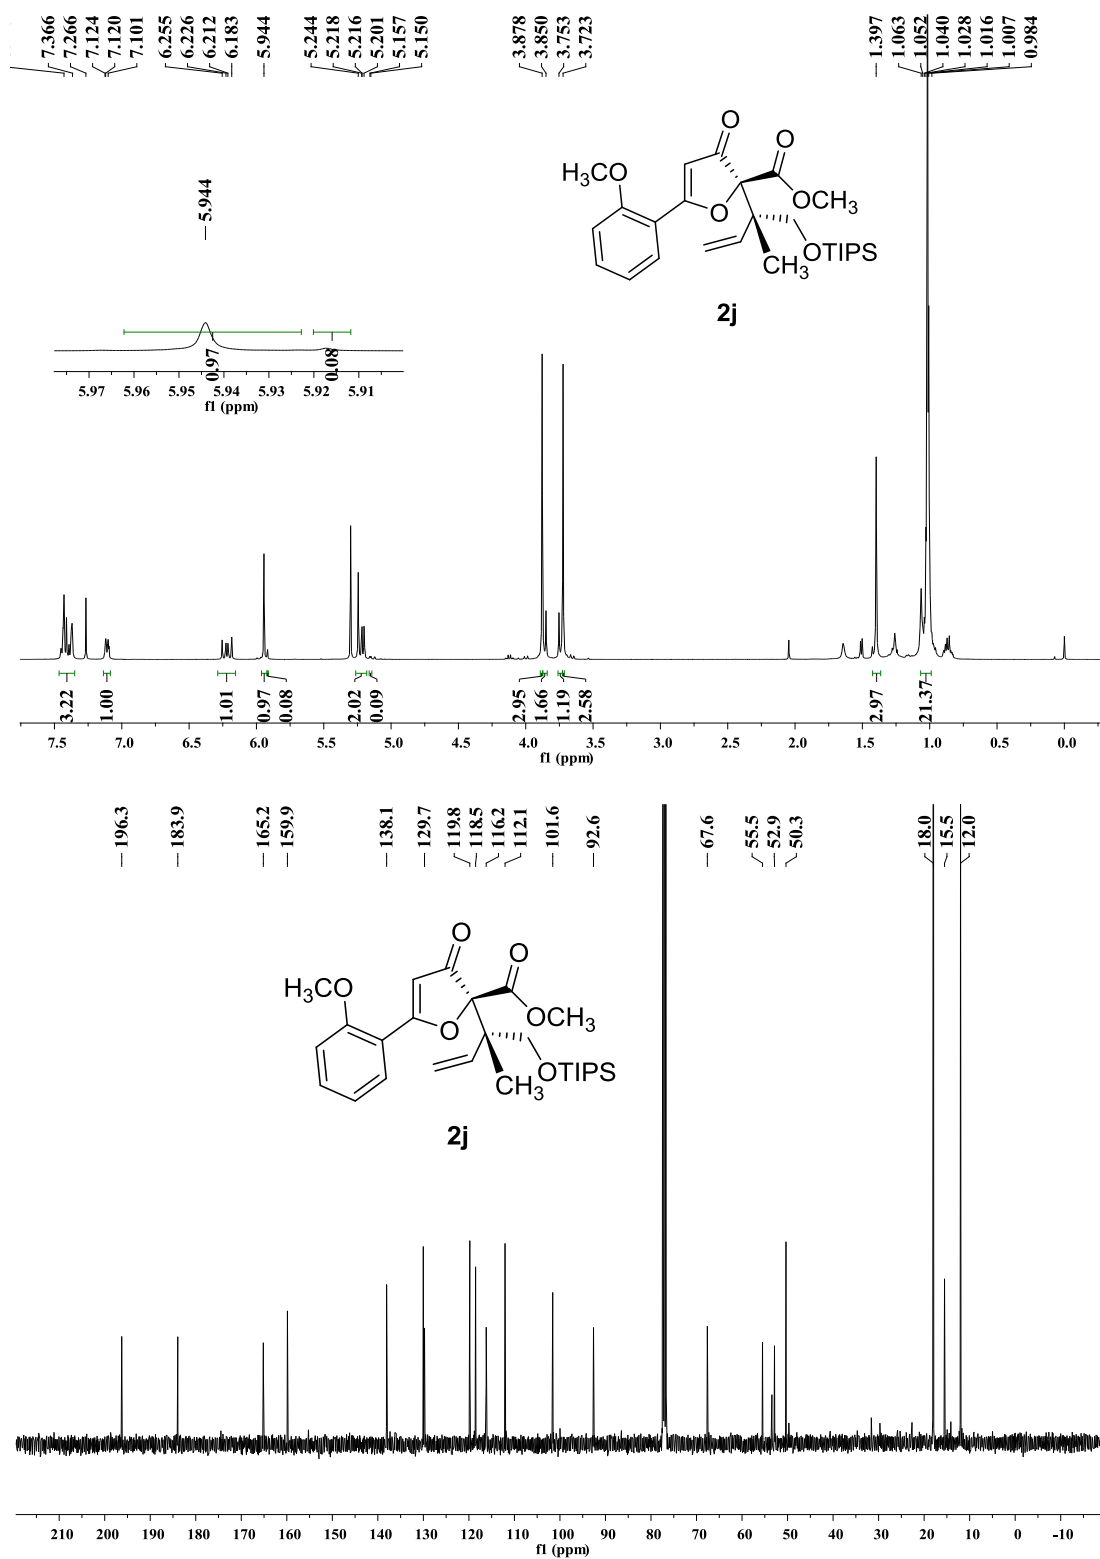

Supplementary Figure 40. <sup>1</sup>H and <sup>13</sup>C spectra for product 2j

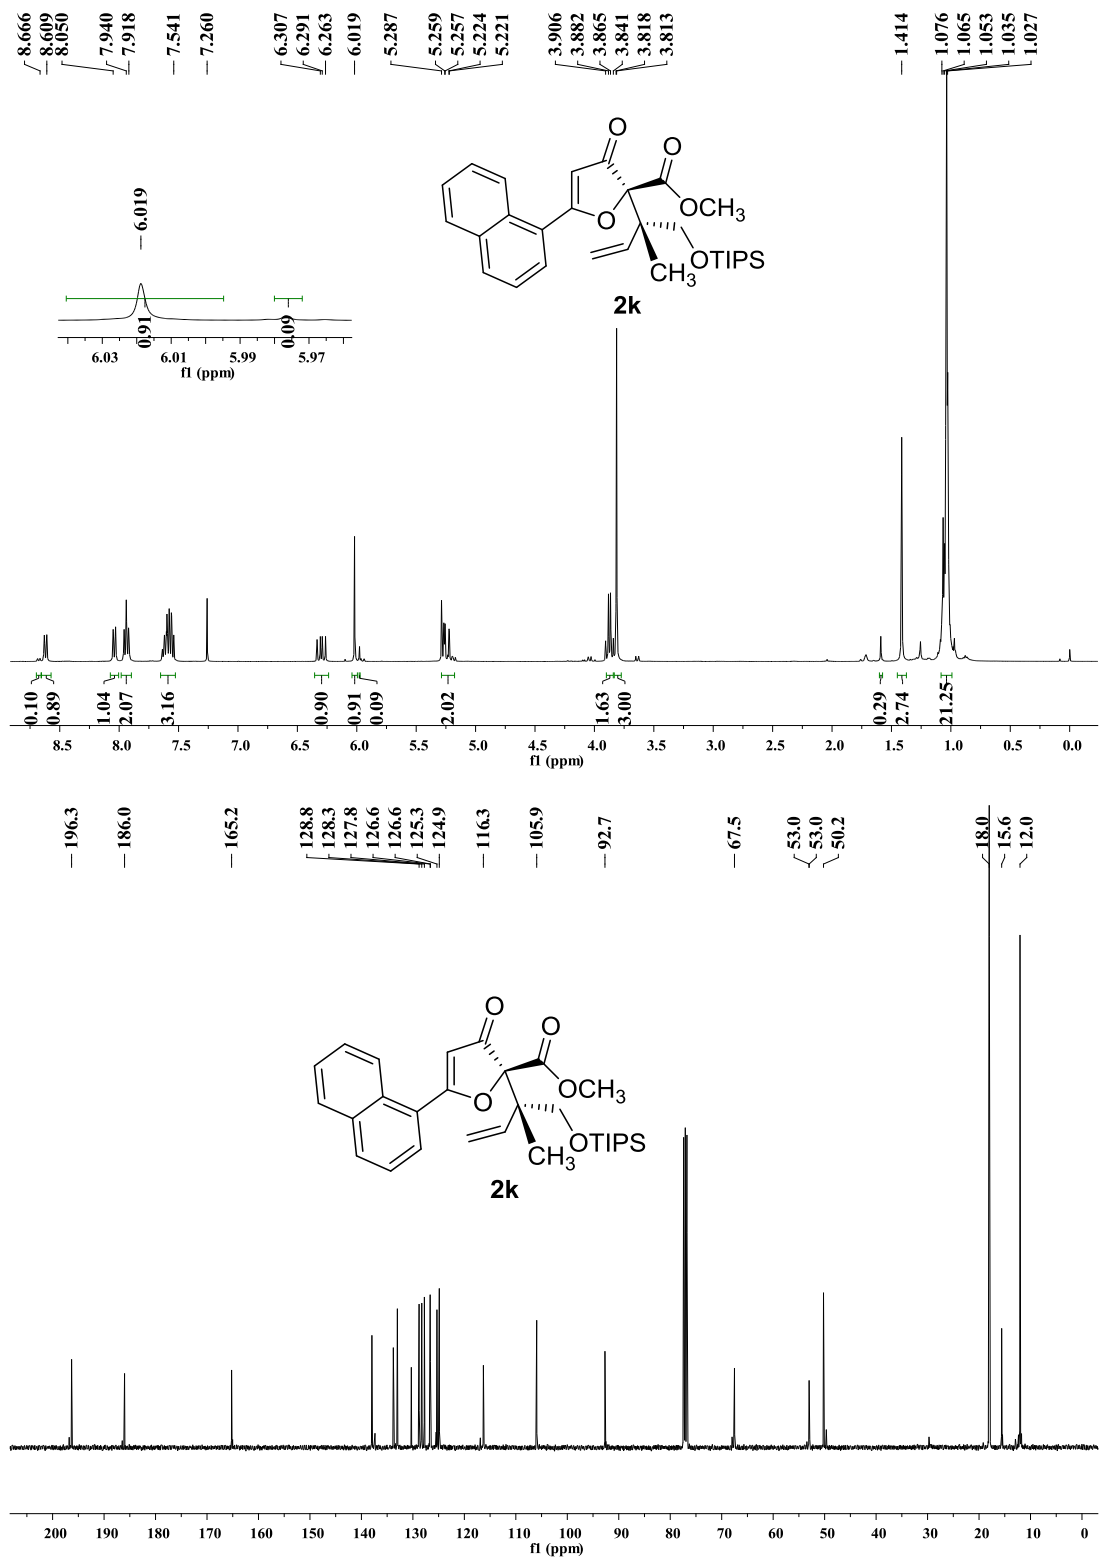

Supplementary Figure 41. <sup>1</sup>H and <sup>13</sup>C spectra for product 2k

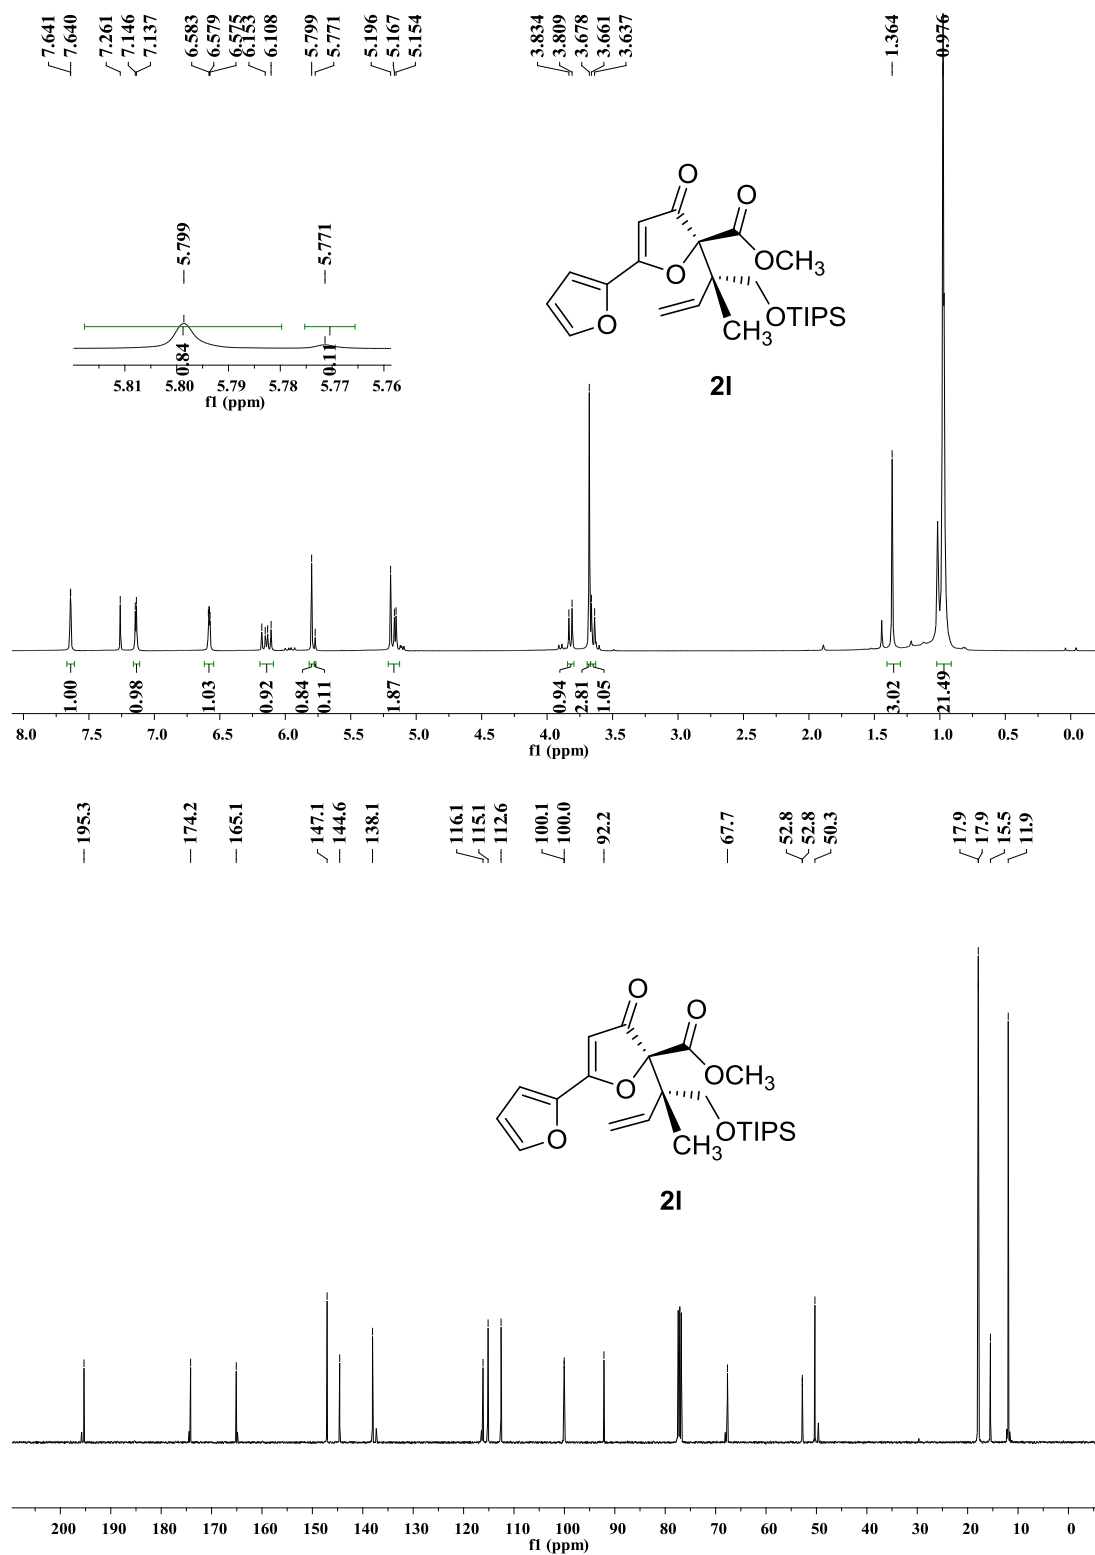

Supplementary Figure 42. <sup>1</sup>H and <sup>13</sup>C spectra for product **21**

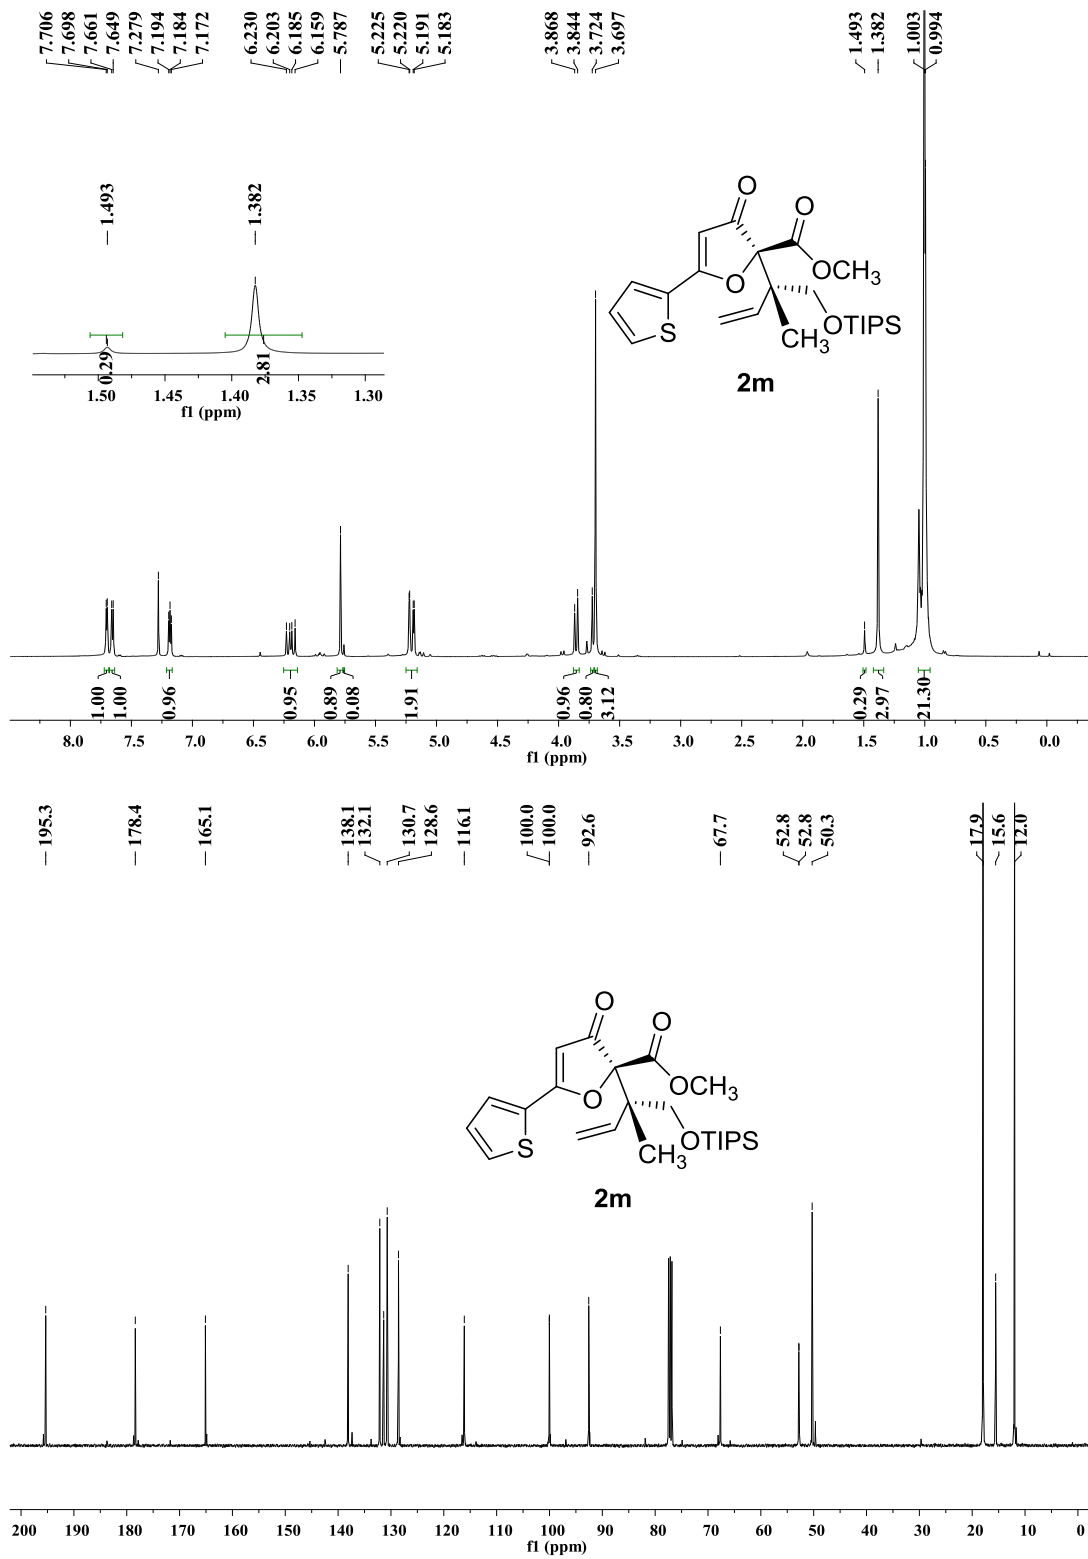

Supplementary Figure 43. <sup>1</sup>H and <sup>13</sup>C spectra for product **2m**



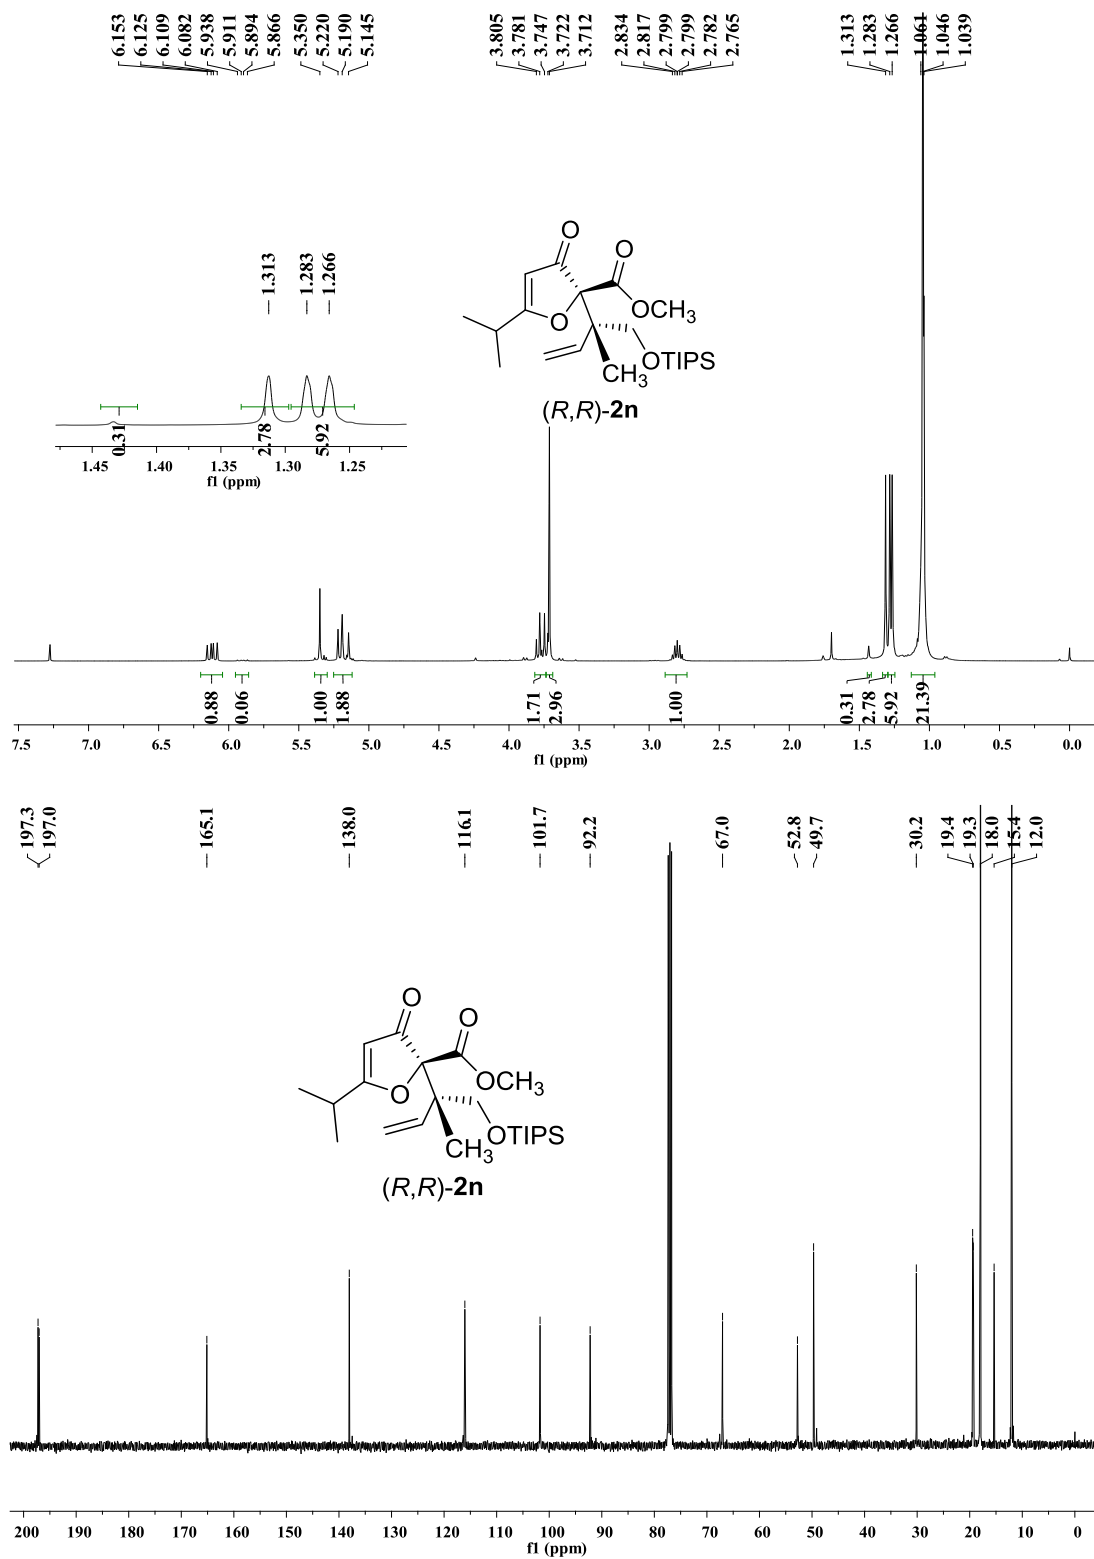

Supplementary Figure 44.  $^1\text{H}$  and  $^{13}\text{C}$  spectra for product (*R,R*)-2n

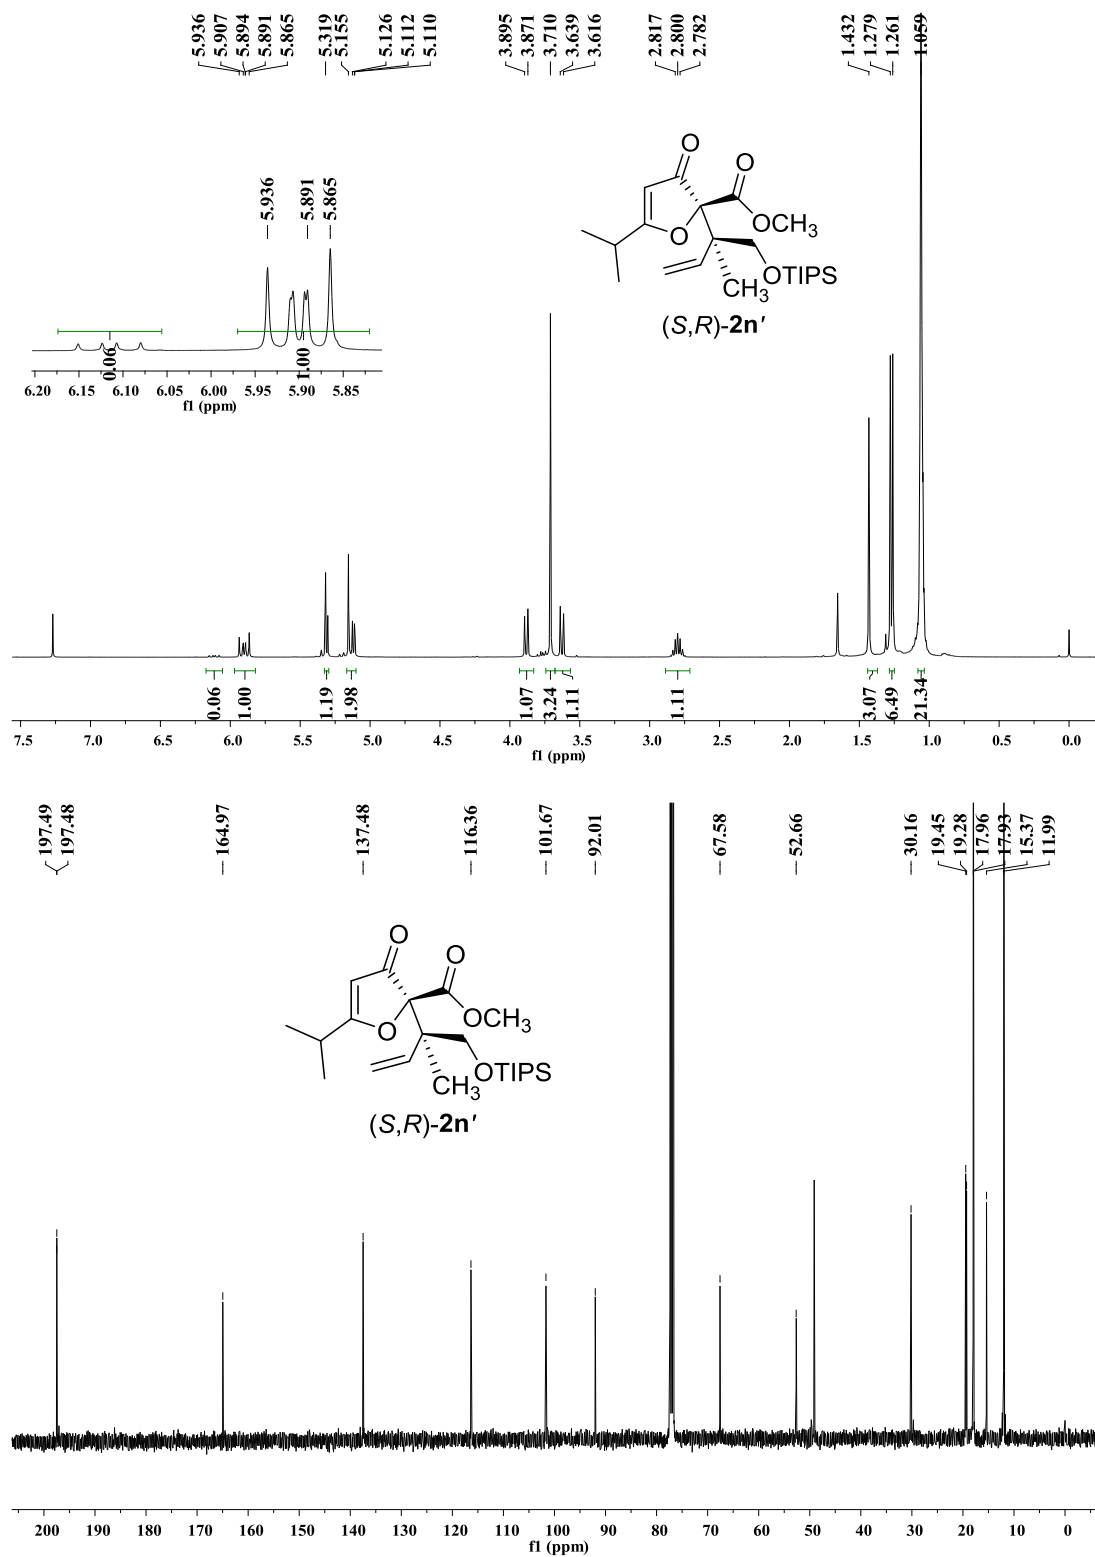

Supplementary Figure 45.  $^1\text{H}$  and  $^{13}\text{C}$  spectra for product  $(S,R)\text{-}2n'$

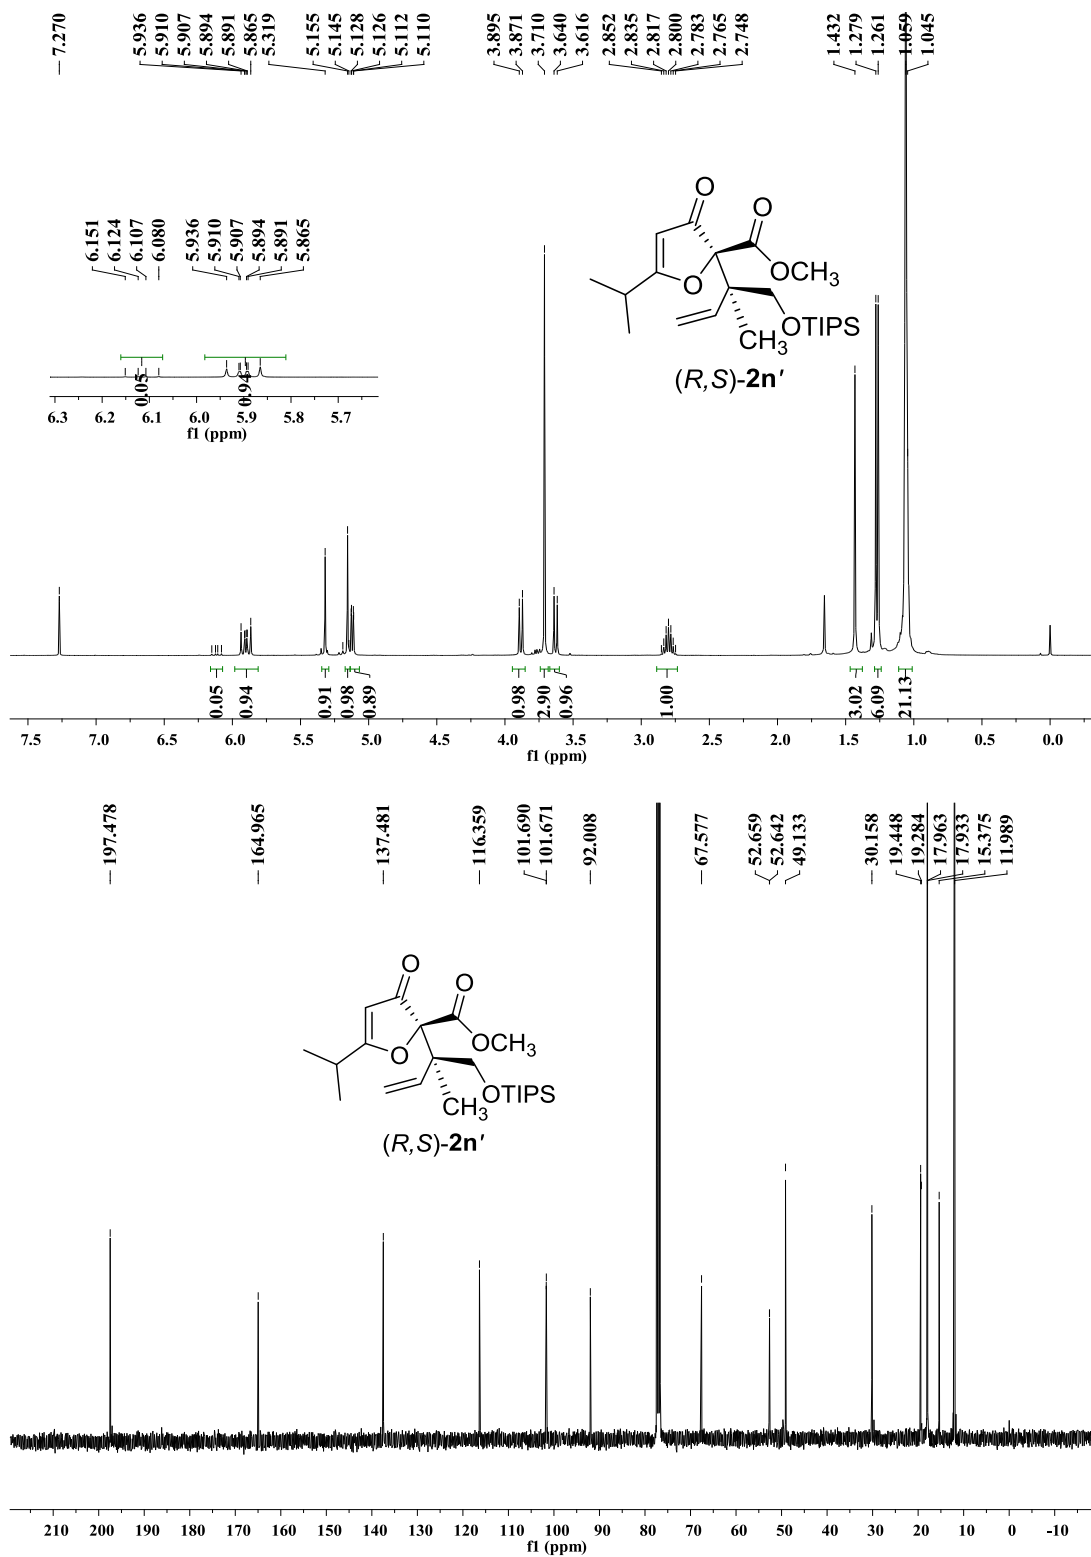

Supplementary Figure 46.  $^1\text{H}$  and  $^{13}\text{C}$  spectra for product  $(R,S)\text{-}2\text{n}'$

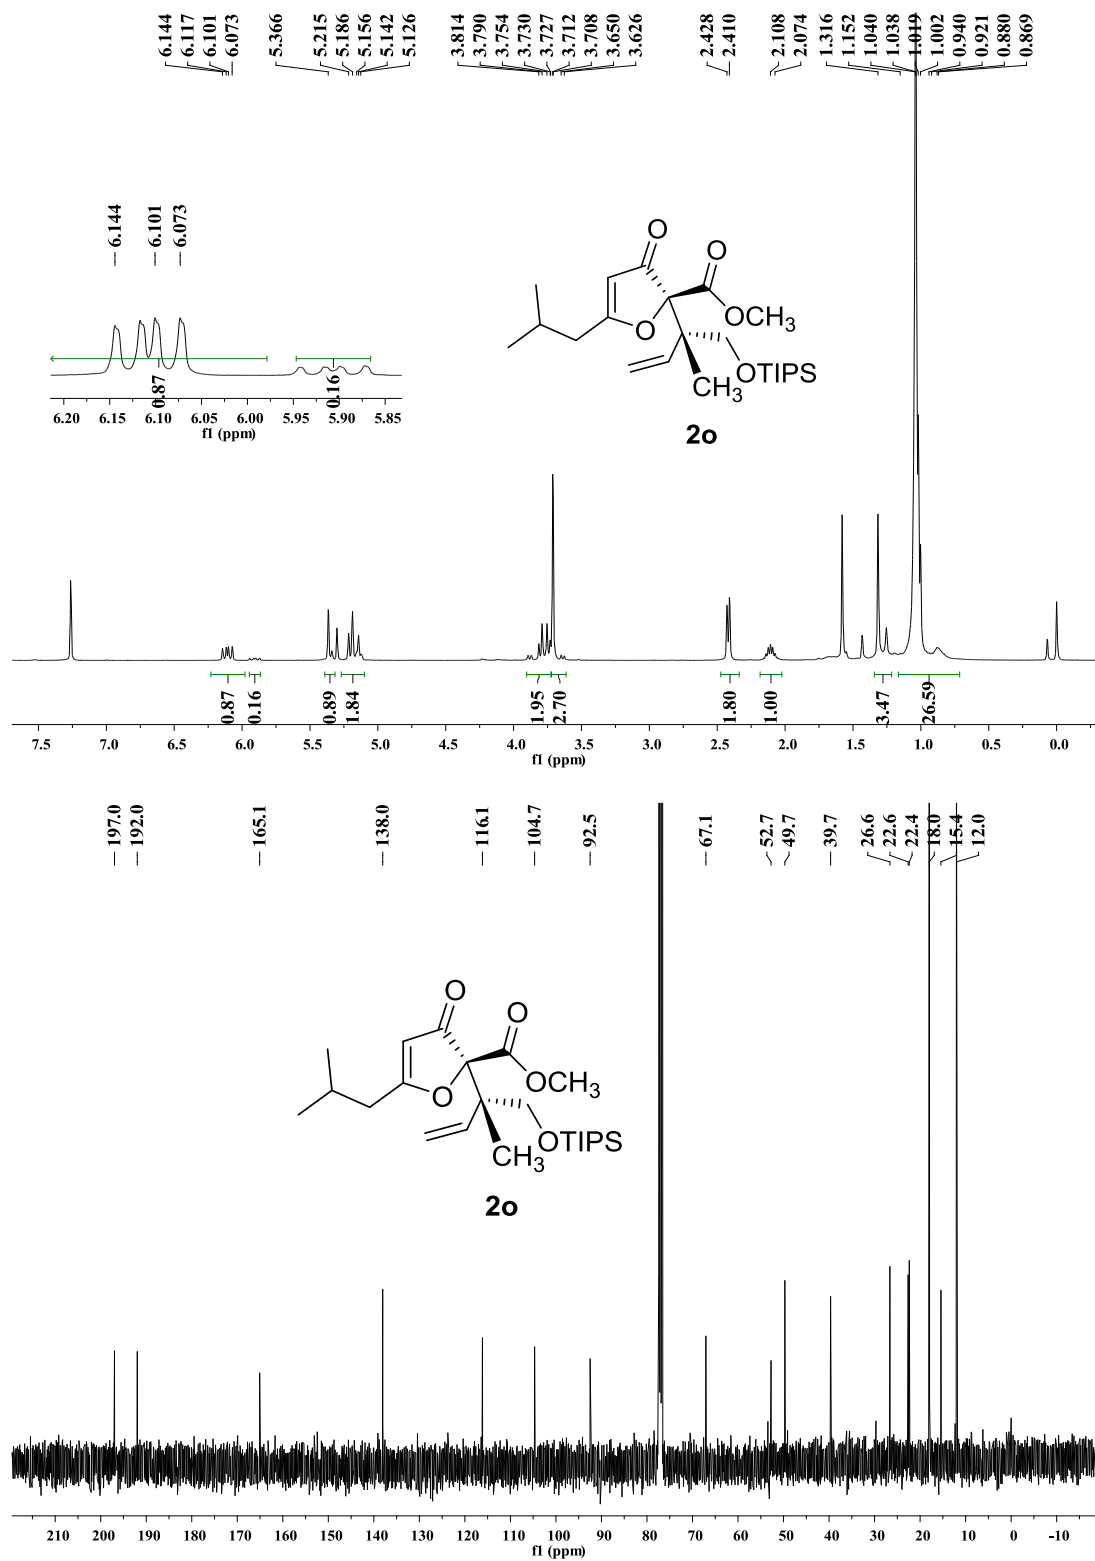

Supplementary Figure 47. <sup>1</sup>H and <sup>13</sup>C spectra for product 2o

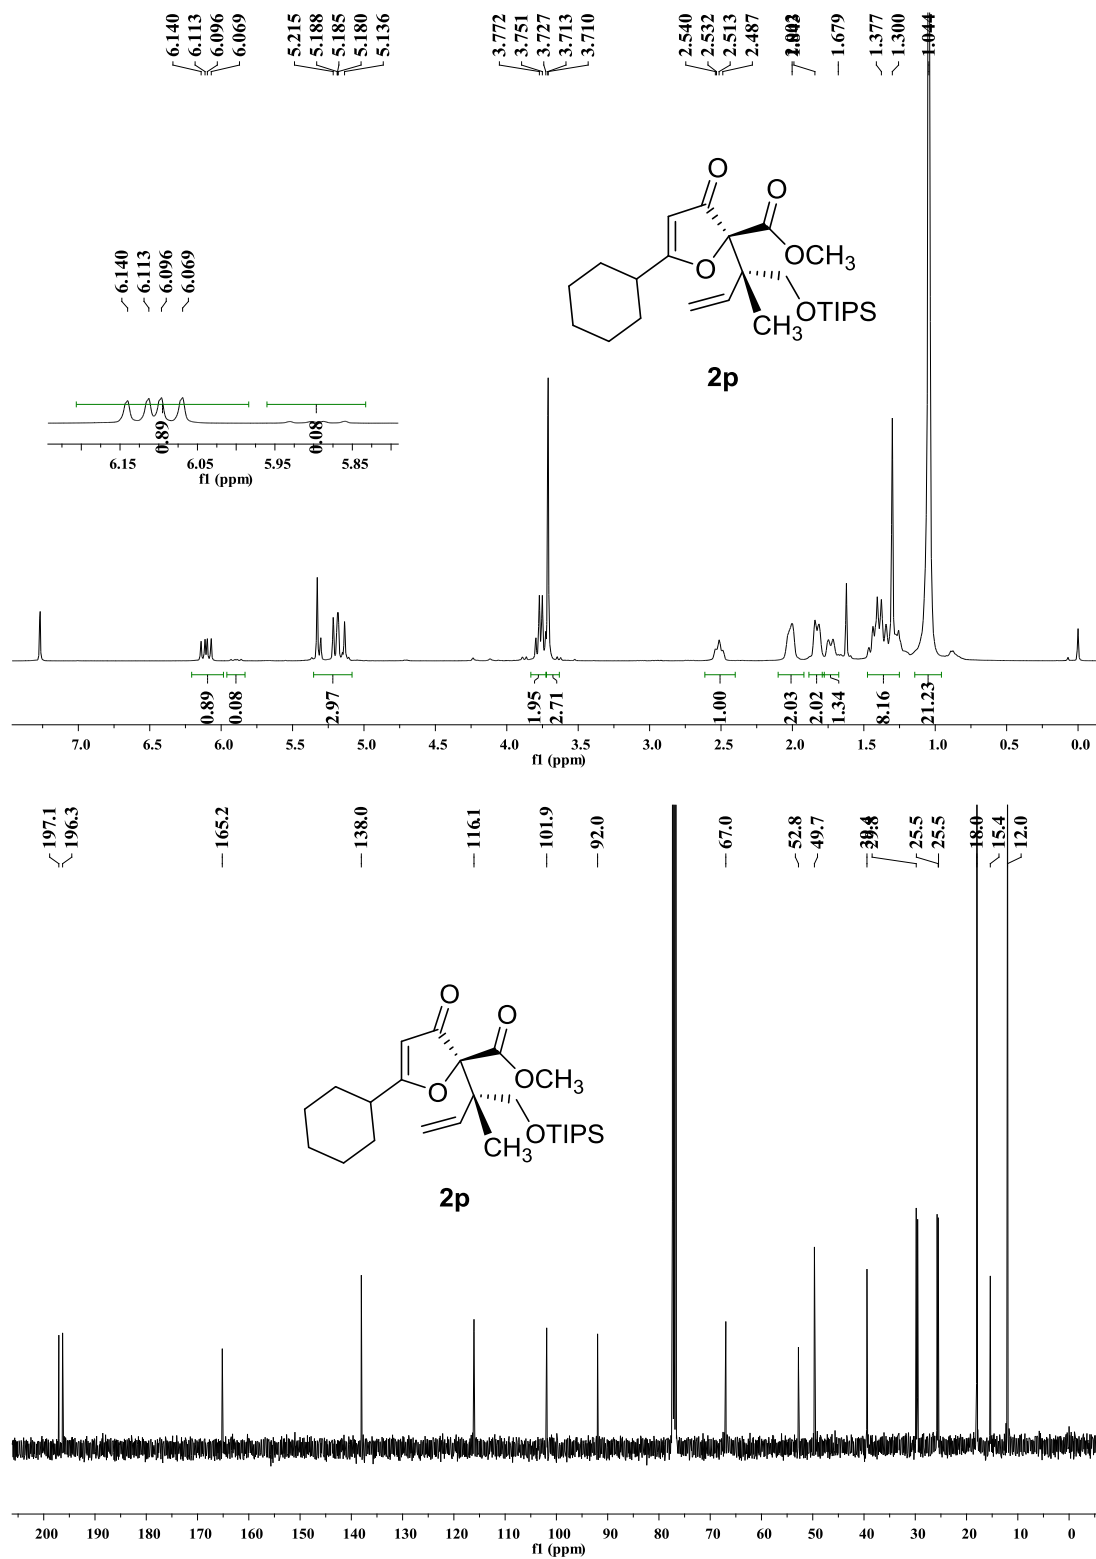

Supplementary Figure 48. <sup>1</sup>H and <sup>13</sup>C spectra for product **2p**

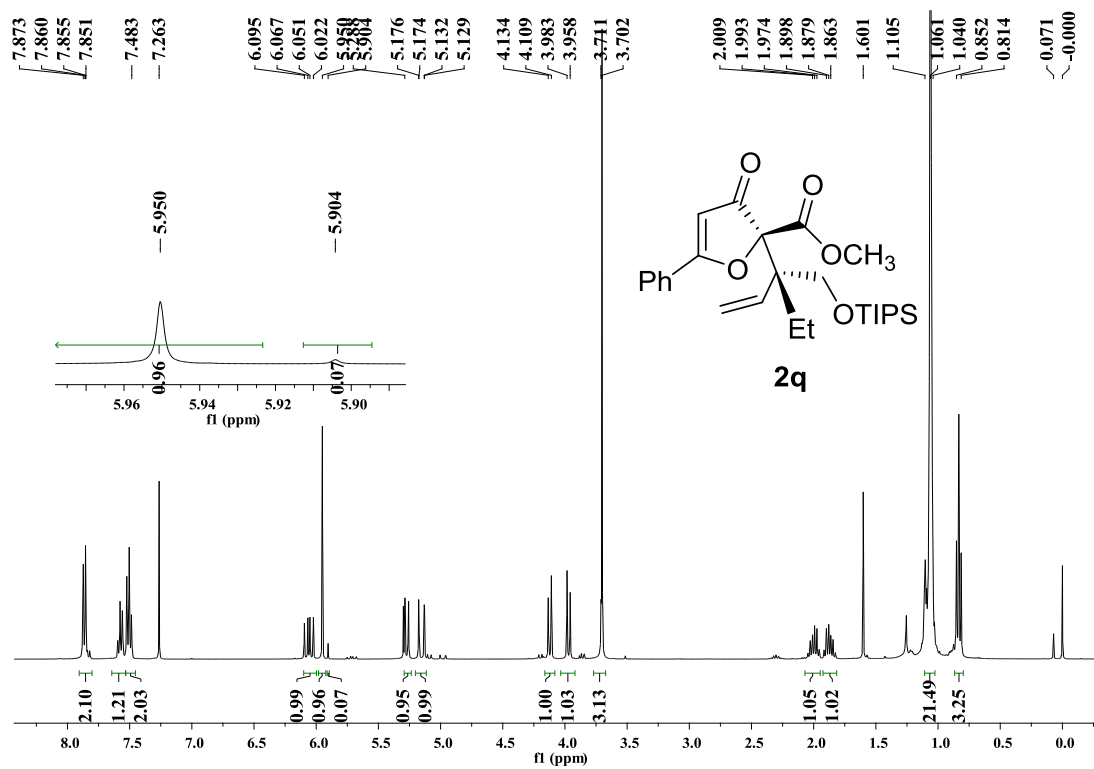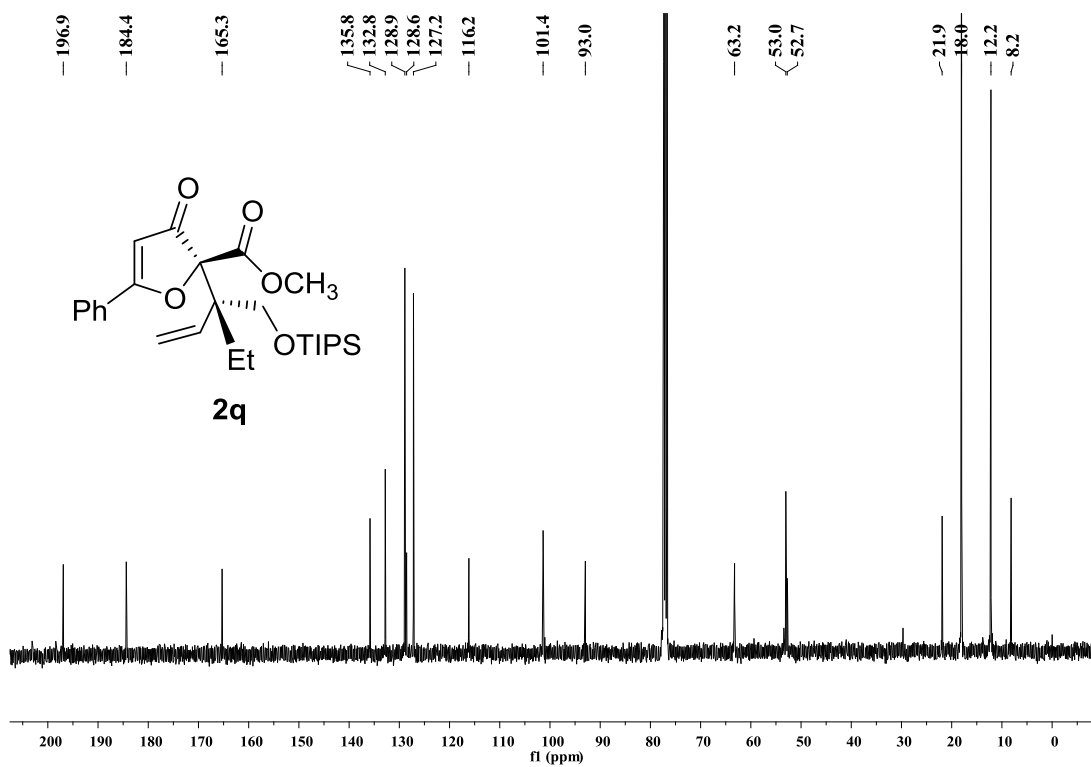

Supplementary Figure 49. <sup>1</sup>H and <sup>13</sup>C spectra for product 2q

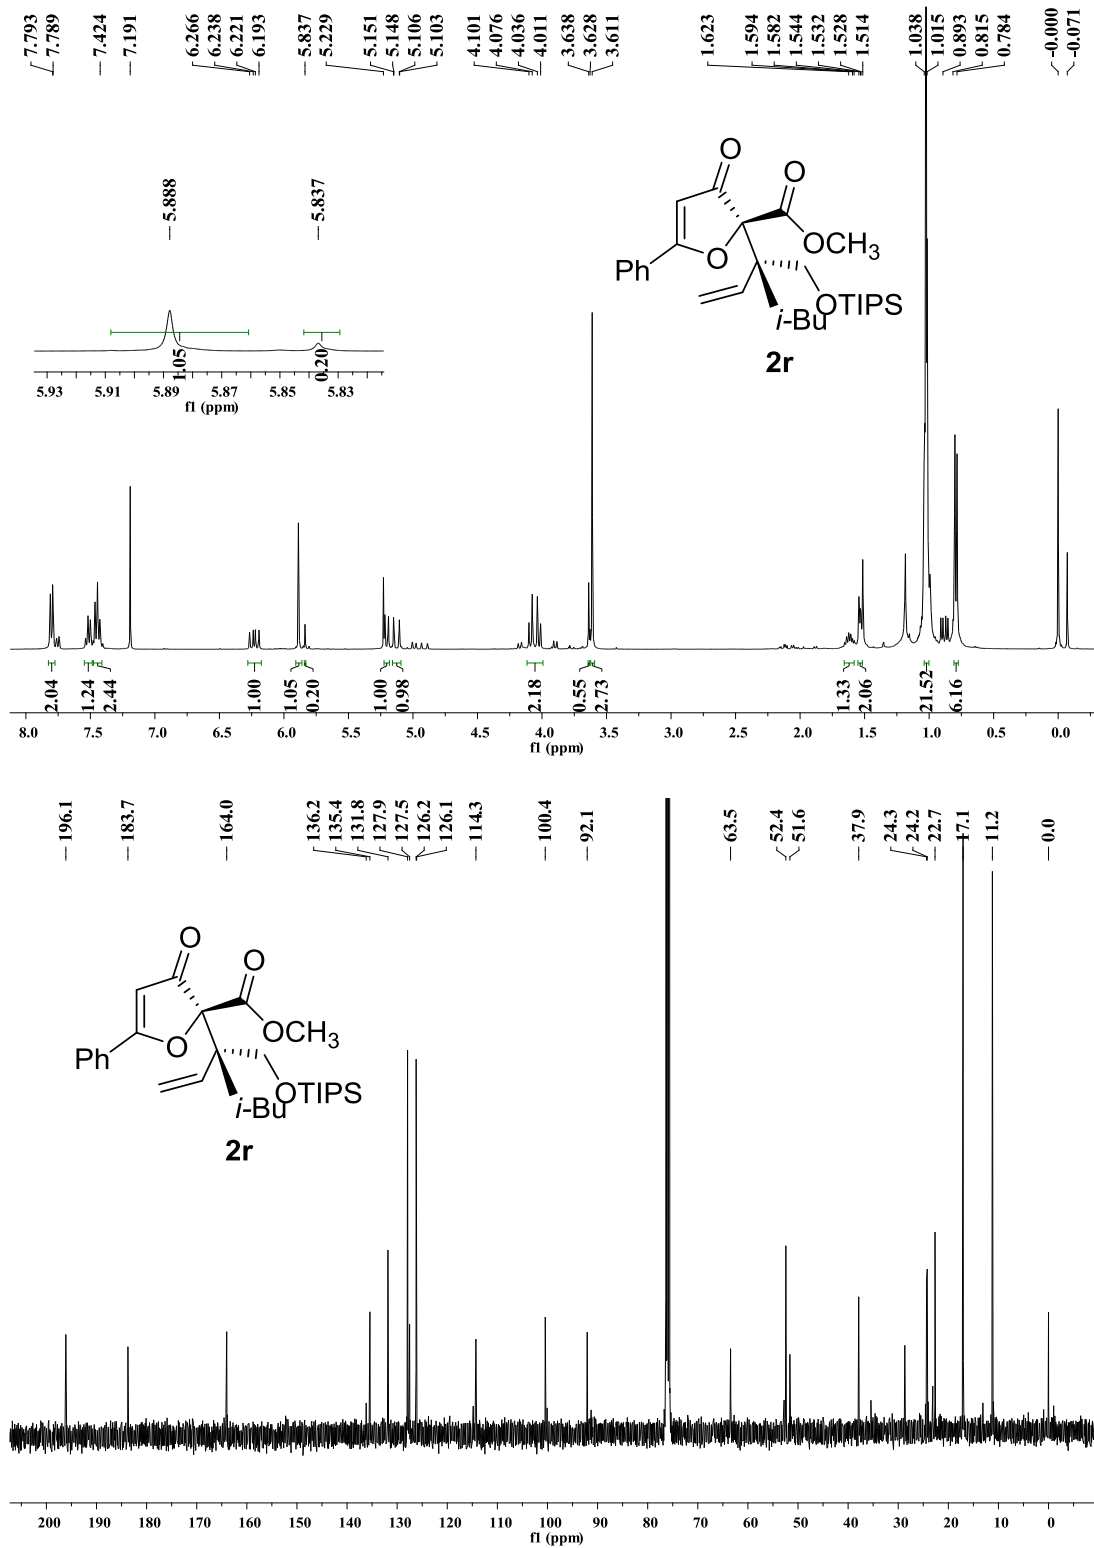

Supplementary Figure 50. <sup>1</sup>H and <sup>13</sup>C spectra for product 2r

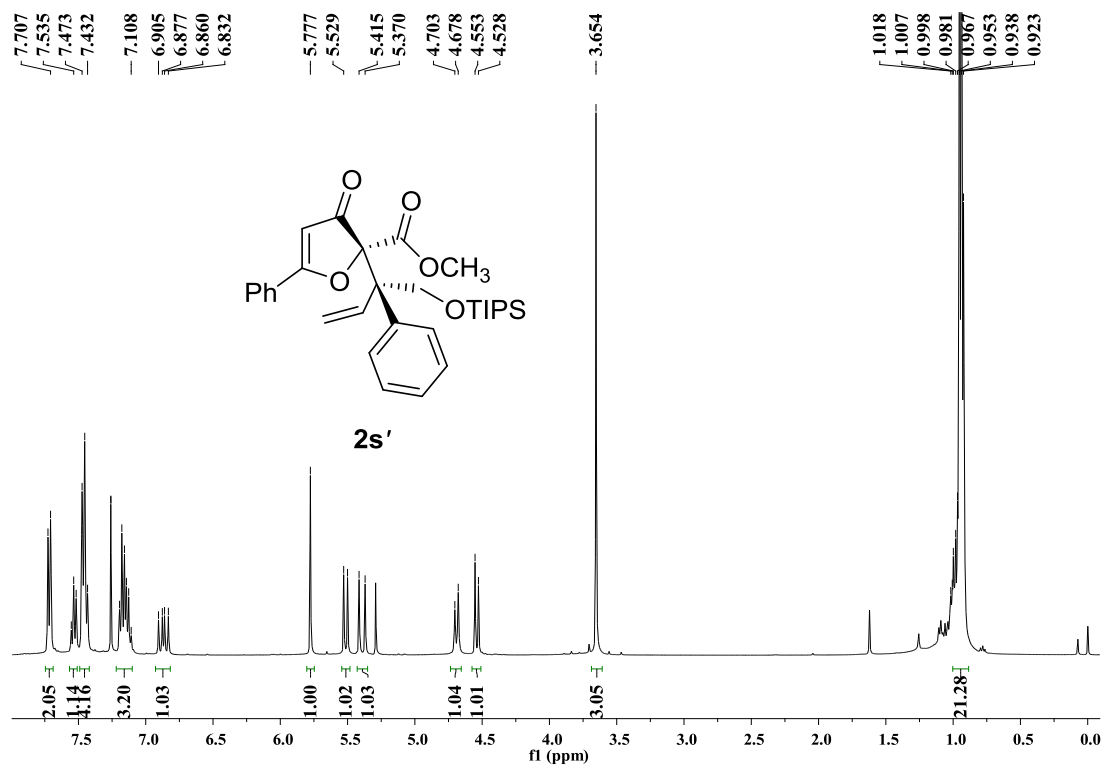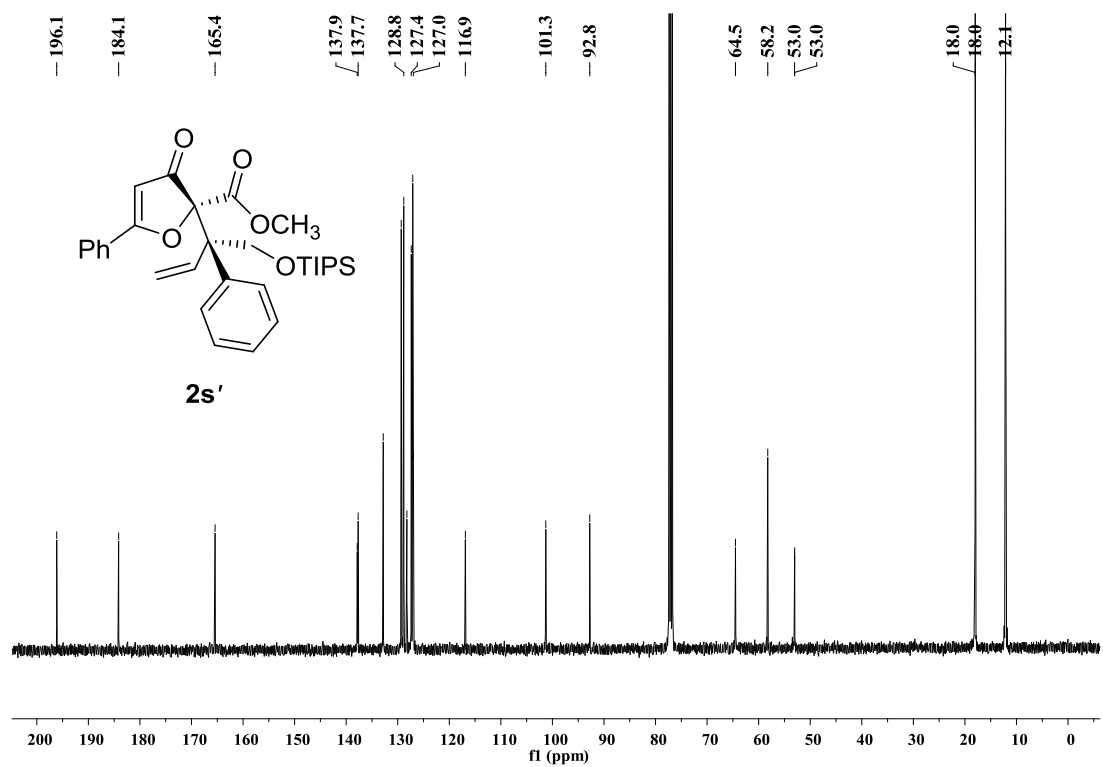

Supplementary Figure 51. <sup>1</sup>H and <sup>13</sup>C spectra for product 2s'



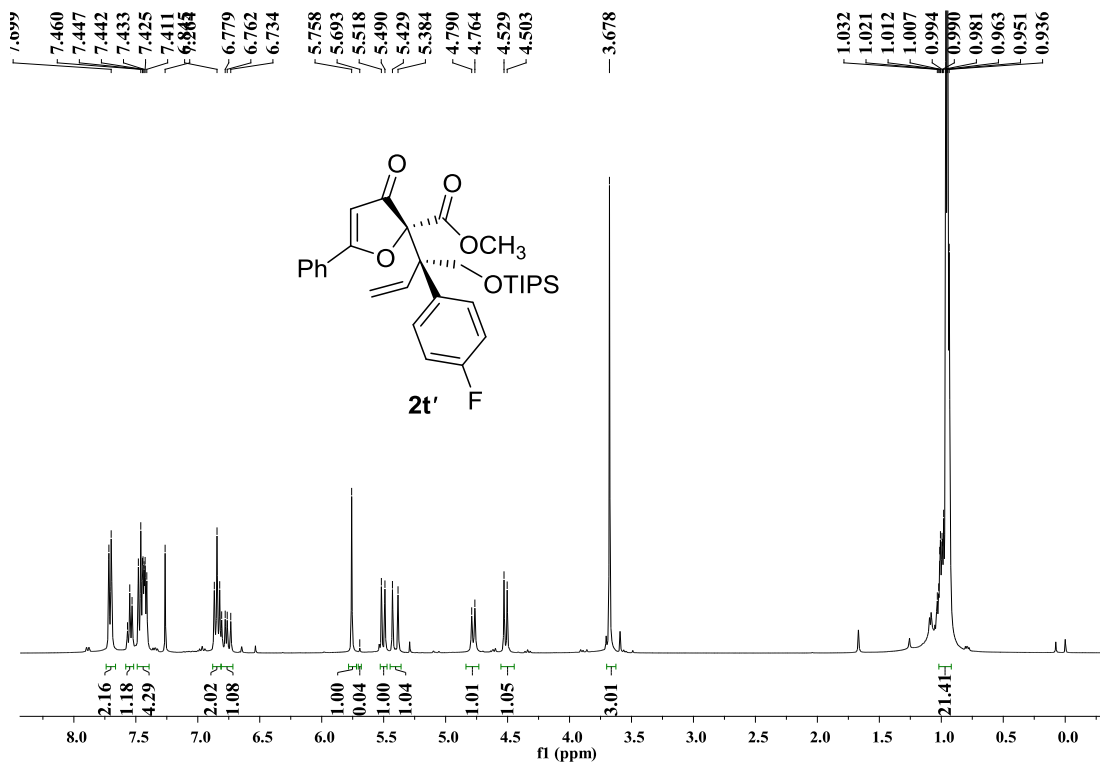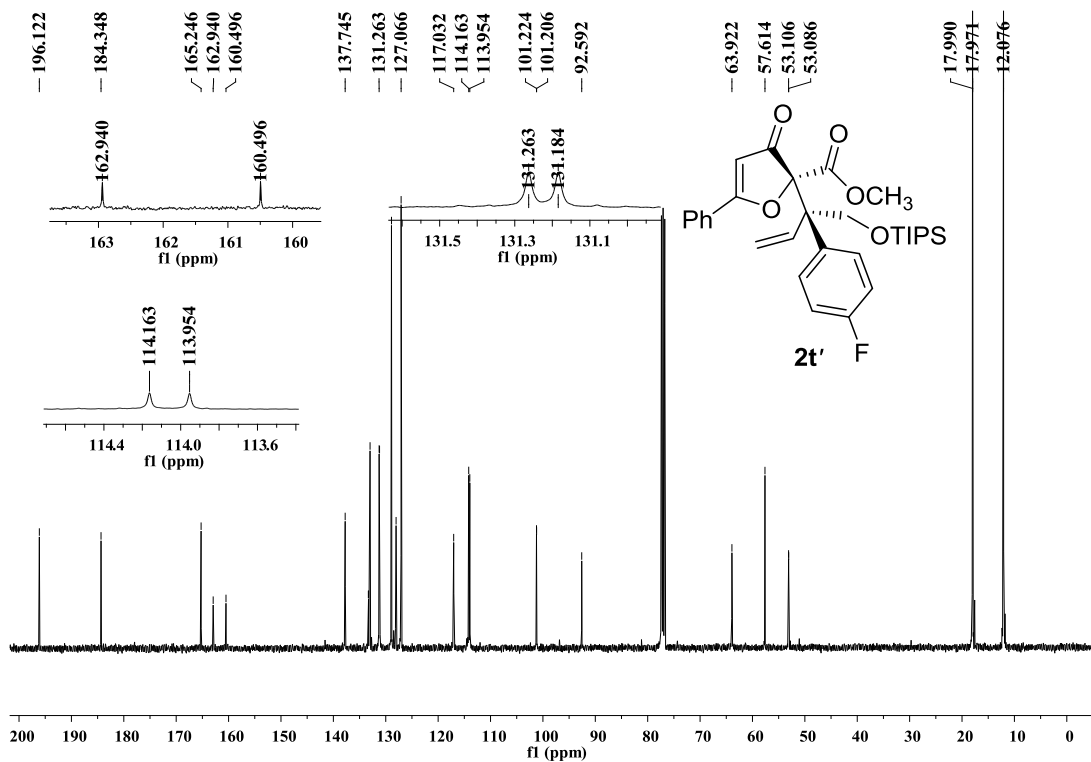

Supplementary Figure 52. <sup>1</sup>H and <sup>13</sup>C spectra for product 2t'

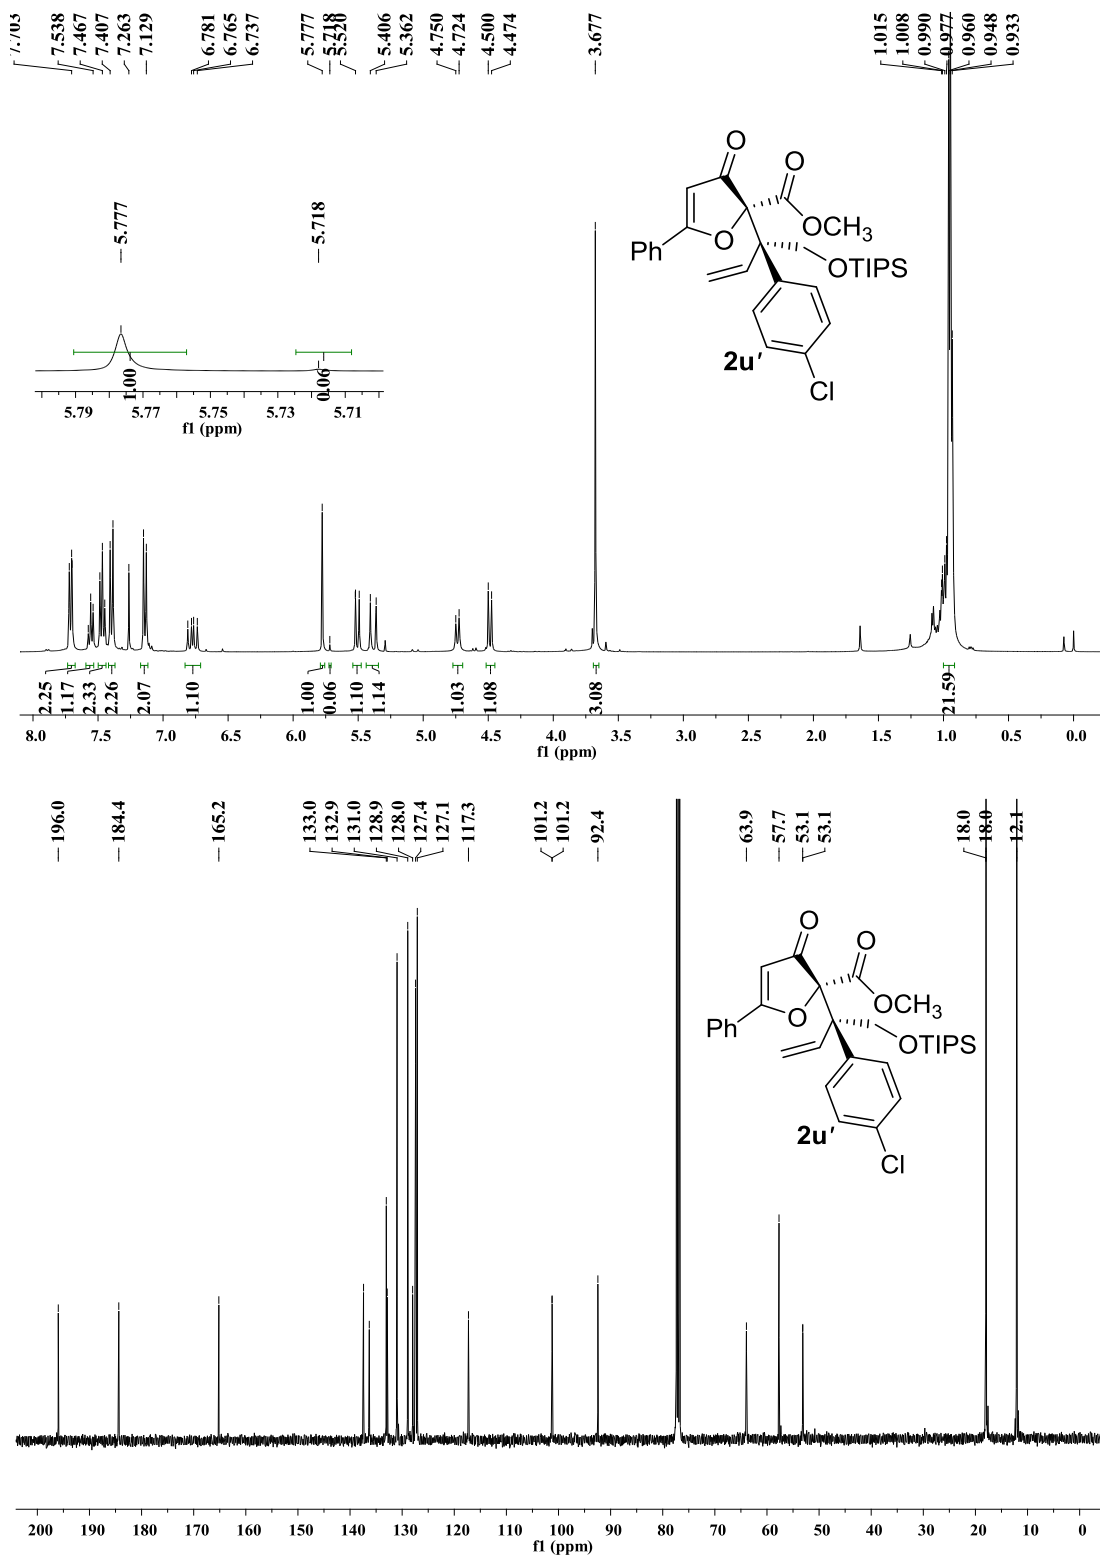

Supplementary Figure 53.  $^1\text{H}$  and  $^{13}\text{C}$  spectra for product **2u'**

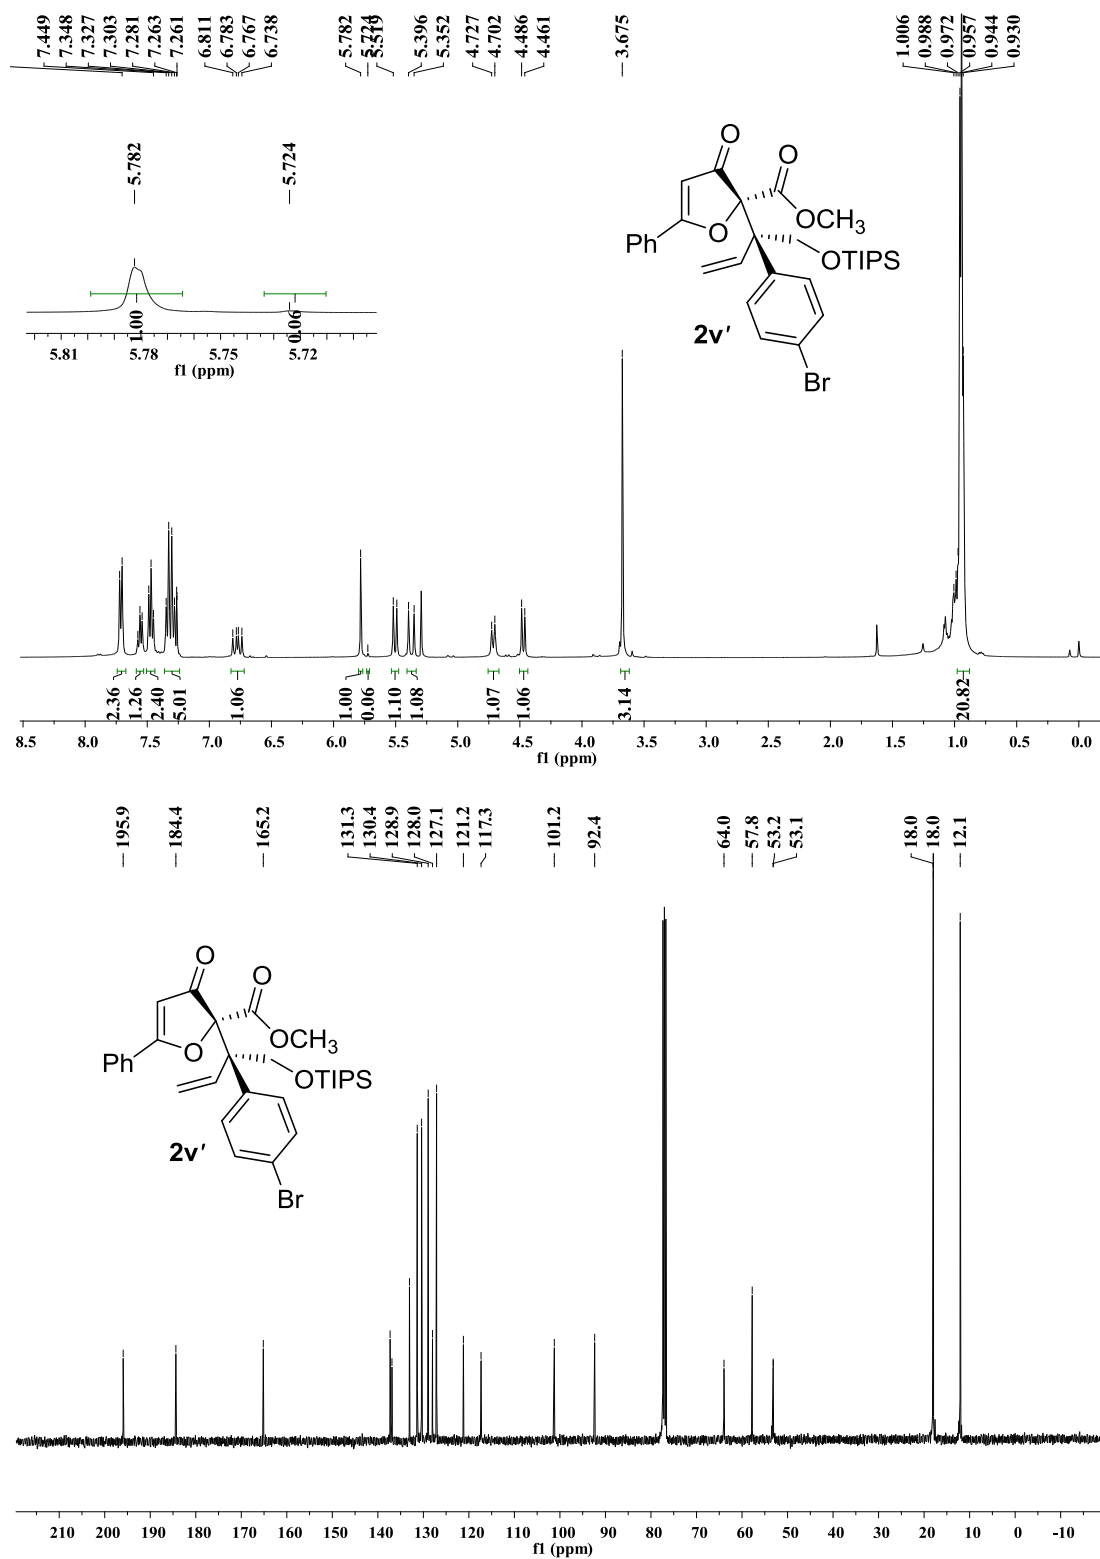

Supplementary Figure 54.  $^1\text{H}$  and  $^{13}\text{C}$  spectra for product **2v'**

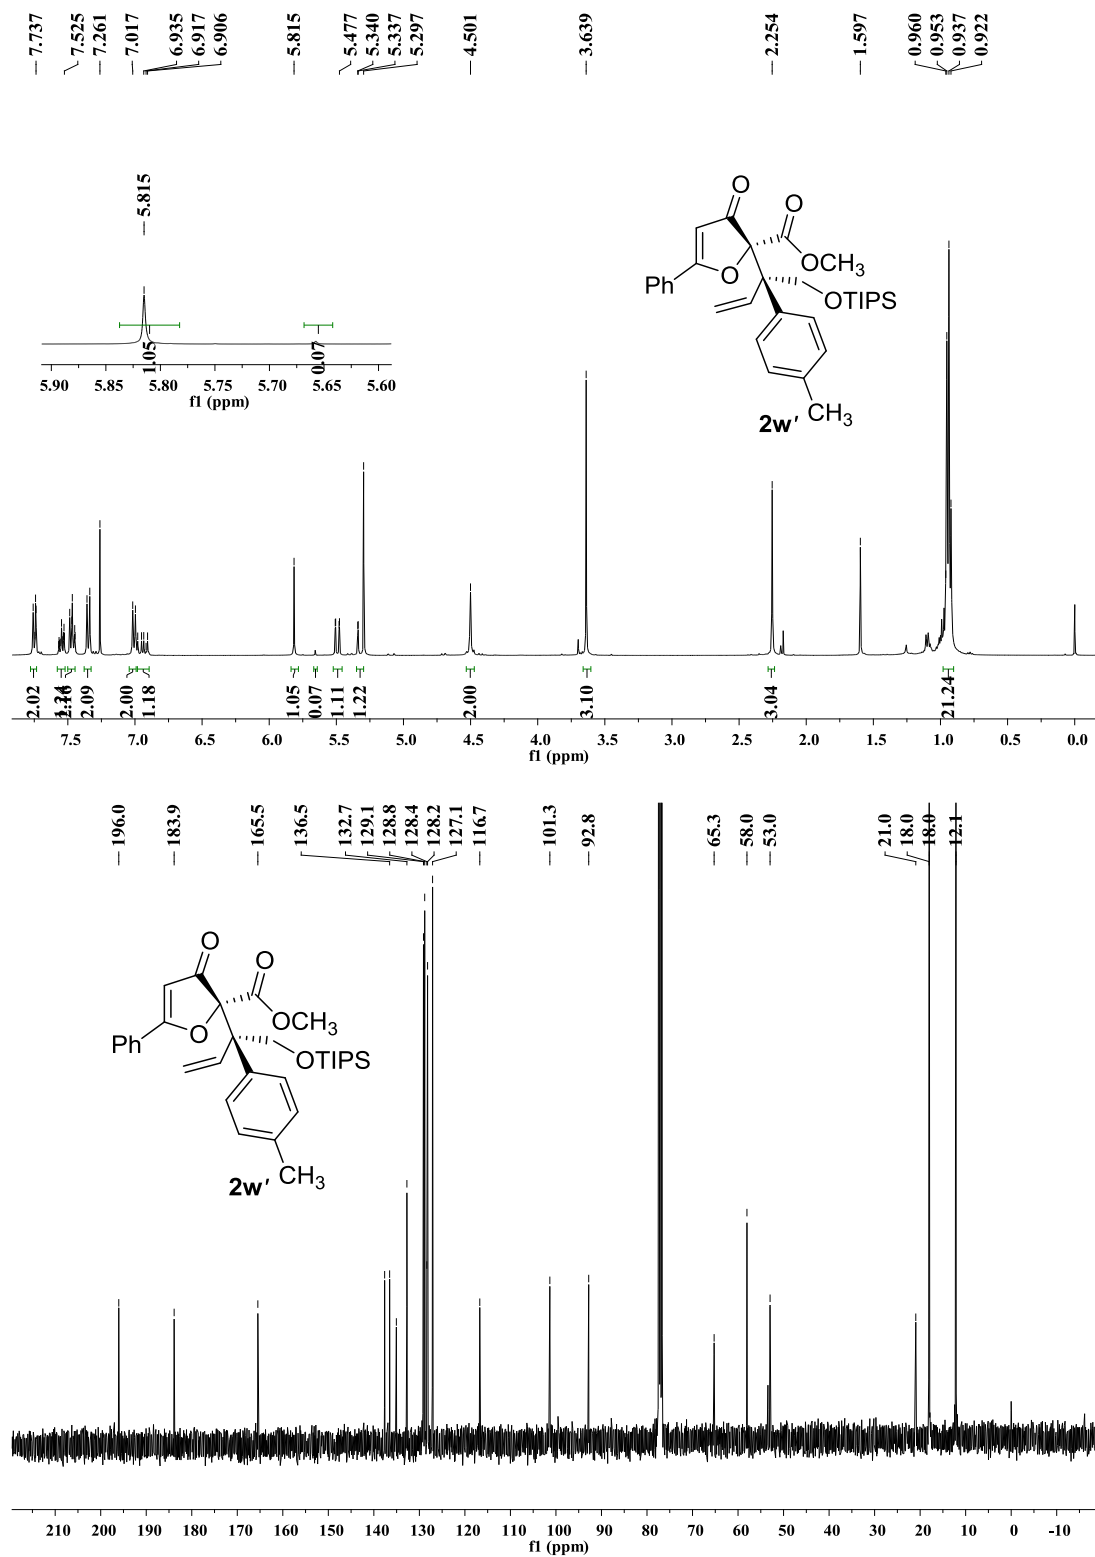

Supplementary Figure 55. <sup>1</sup>H and <sup>13</sup>C spectra for product **2w'**

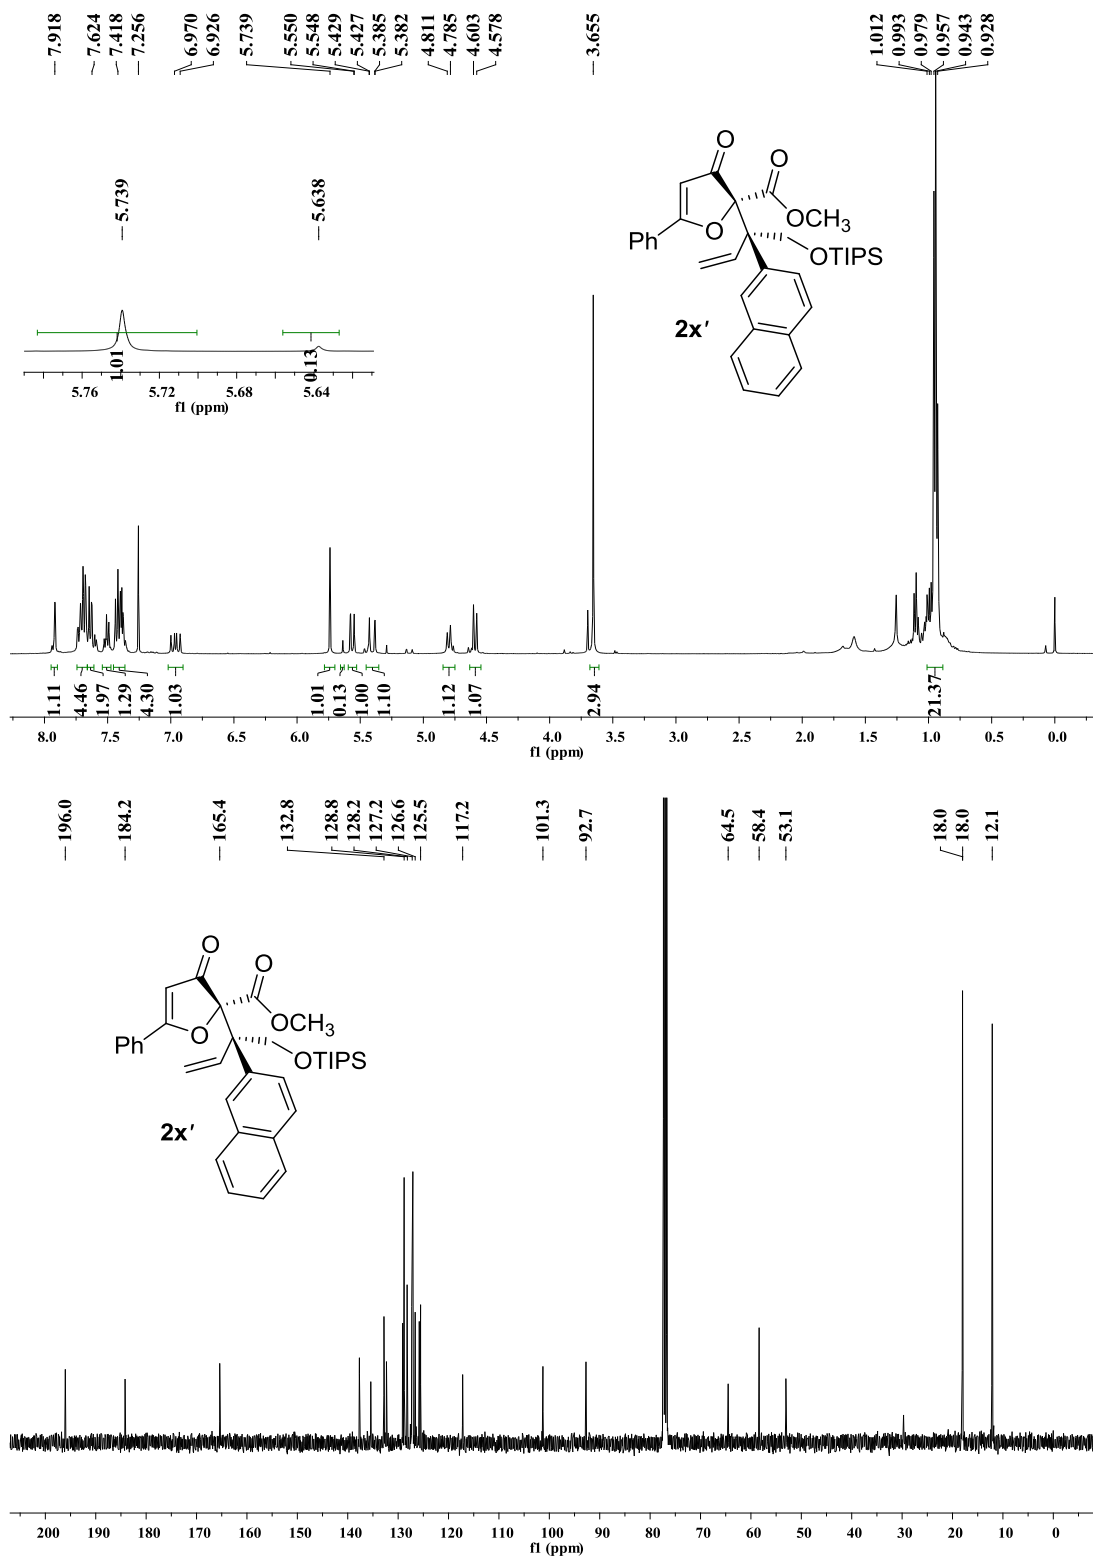

Supplementary Figure 56. <sup>1</sup>H and <sup>13</sup>C spectra for product **2x'**

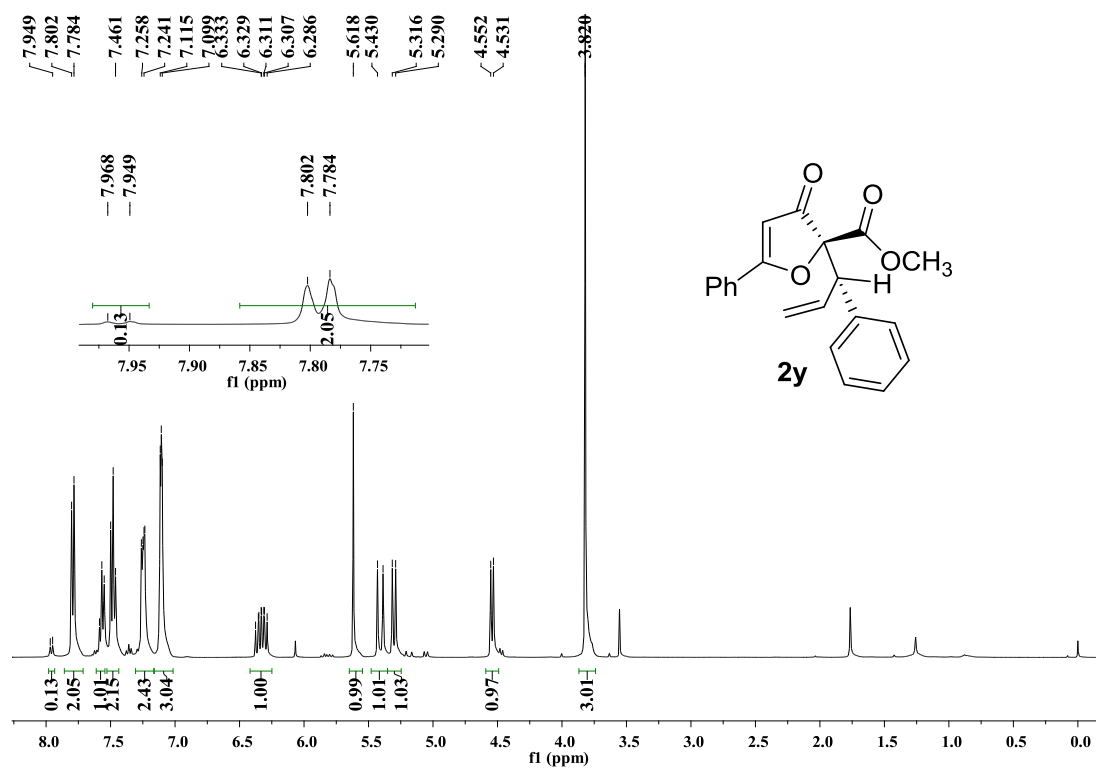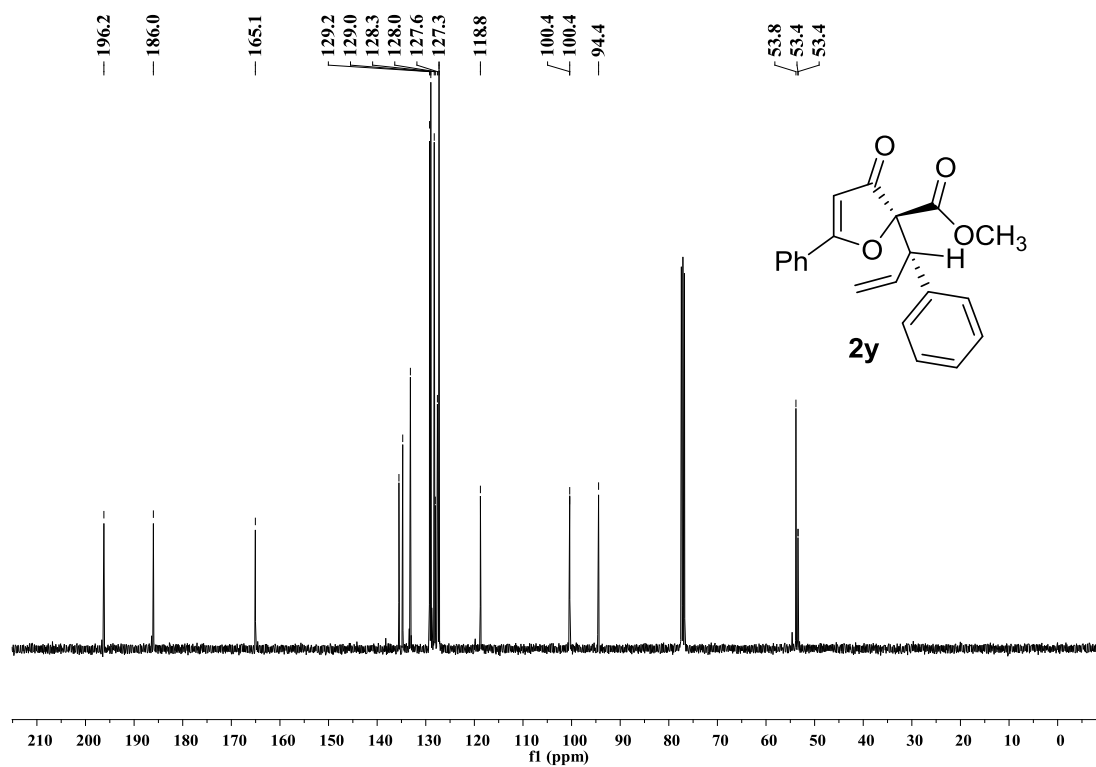

Supplementary Figure 57. <sup>1</sup>H and <sup>13</sup>C spectra for product 2y

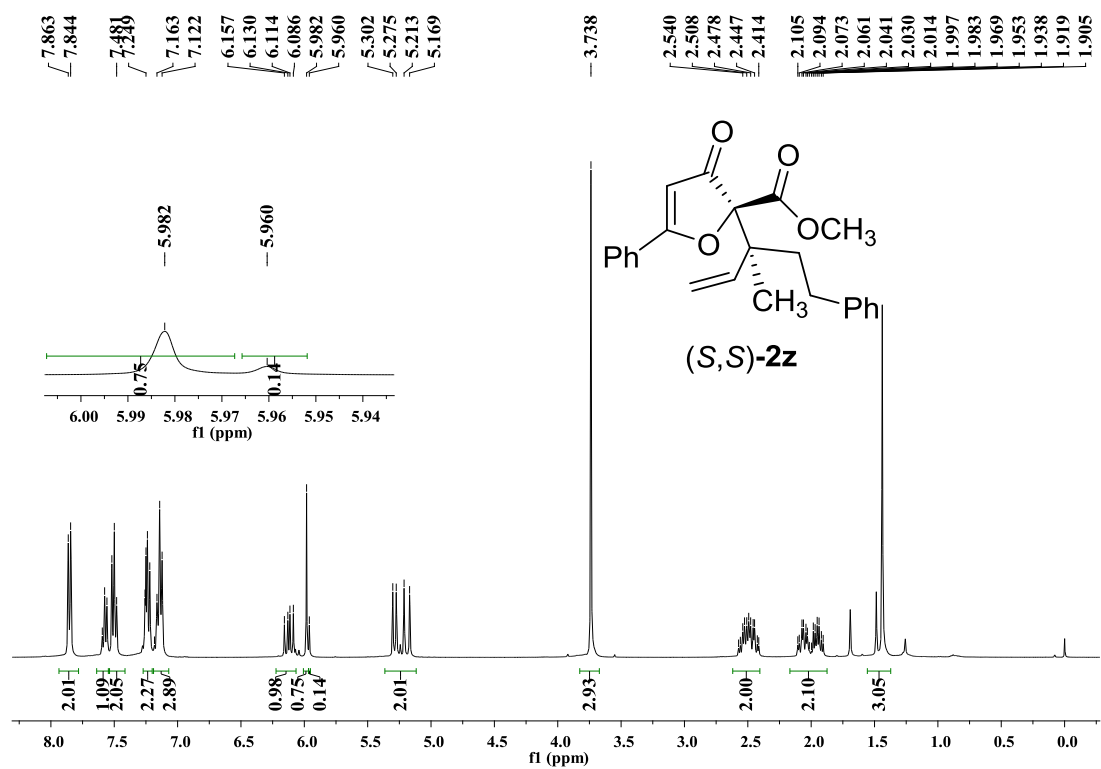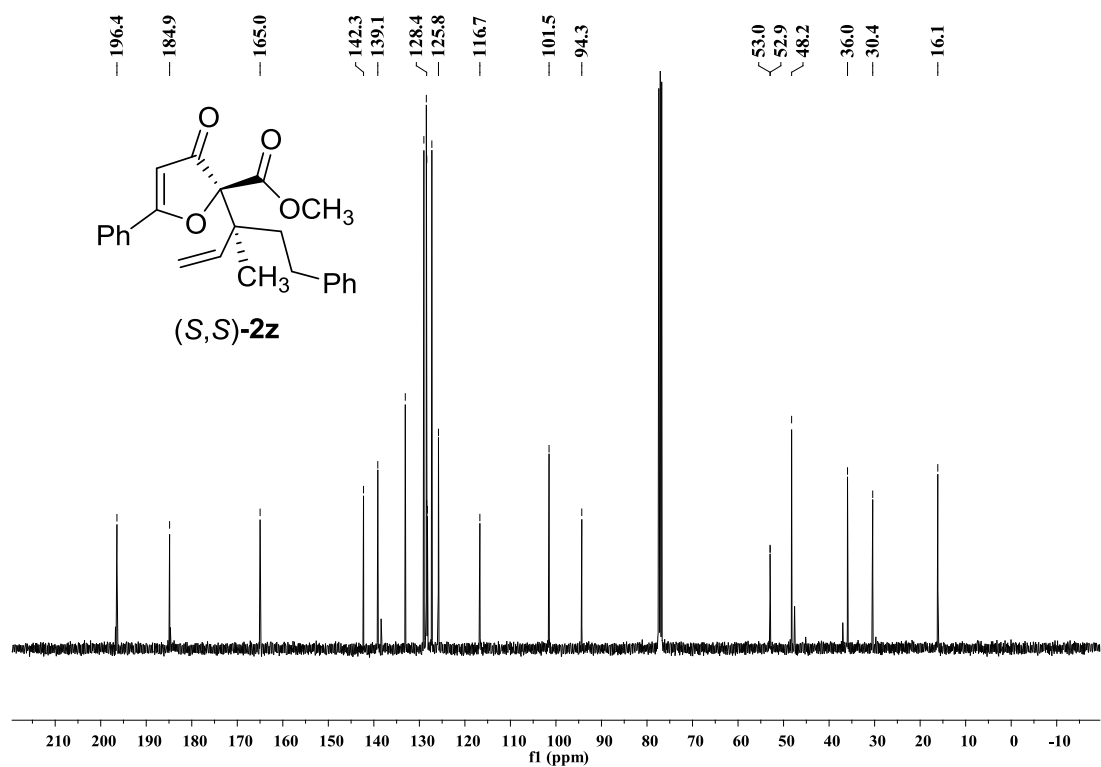

Supplementary Figure 58. <sup>1</sup>H and <sup>13</sup>C spectra for product (S,S)-2z

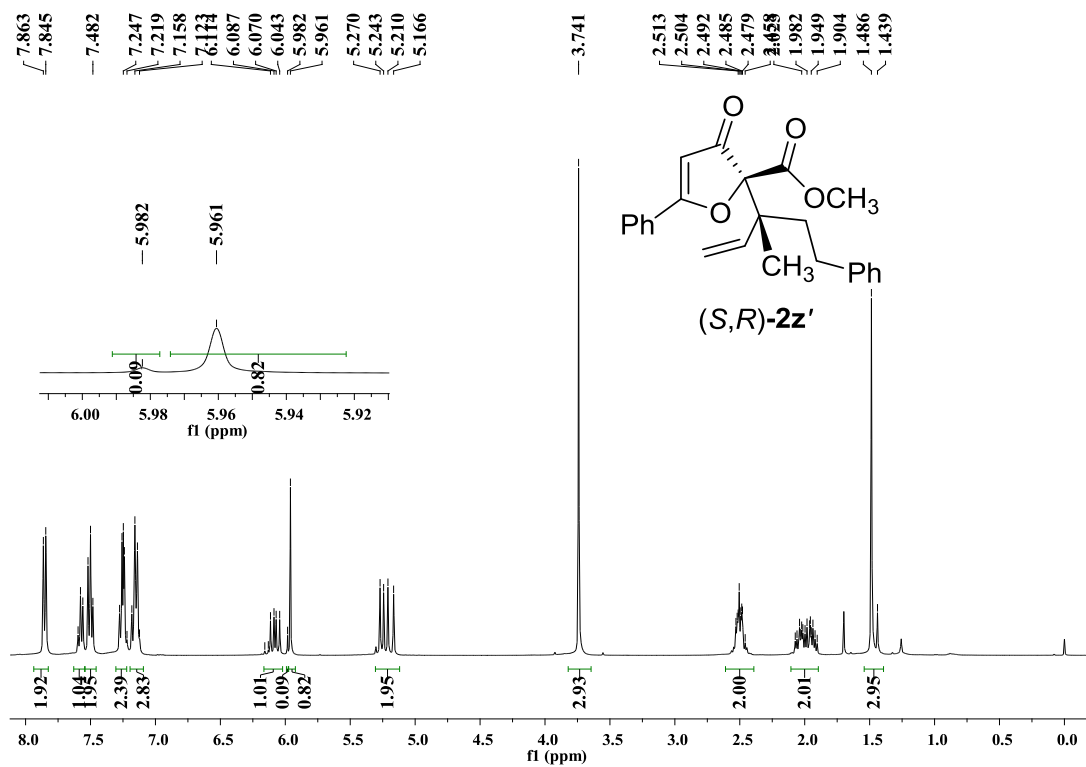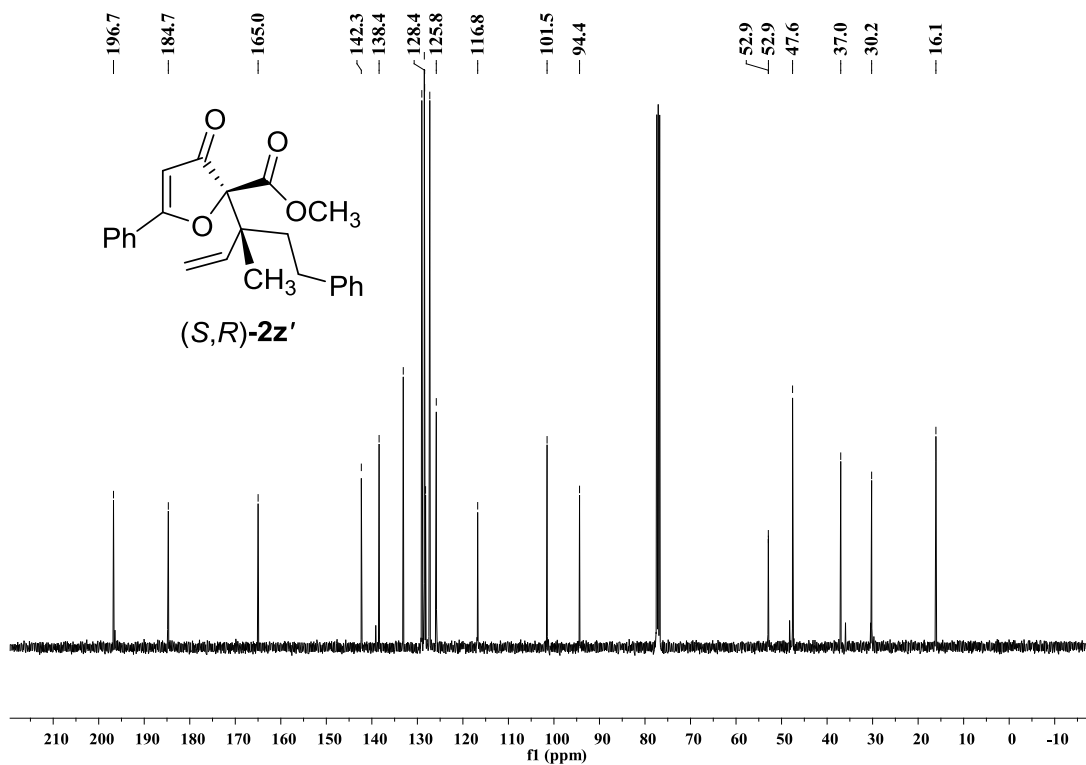

Supplementary Figure 59. <sup>1</sup>H and <sup>13</sup>C spectra for product (*S,R*)-2z'



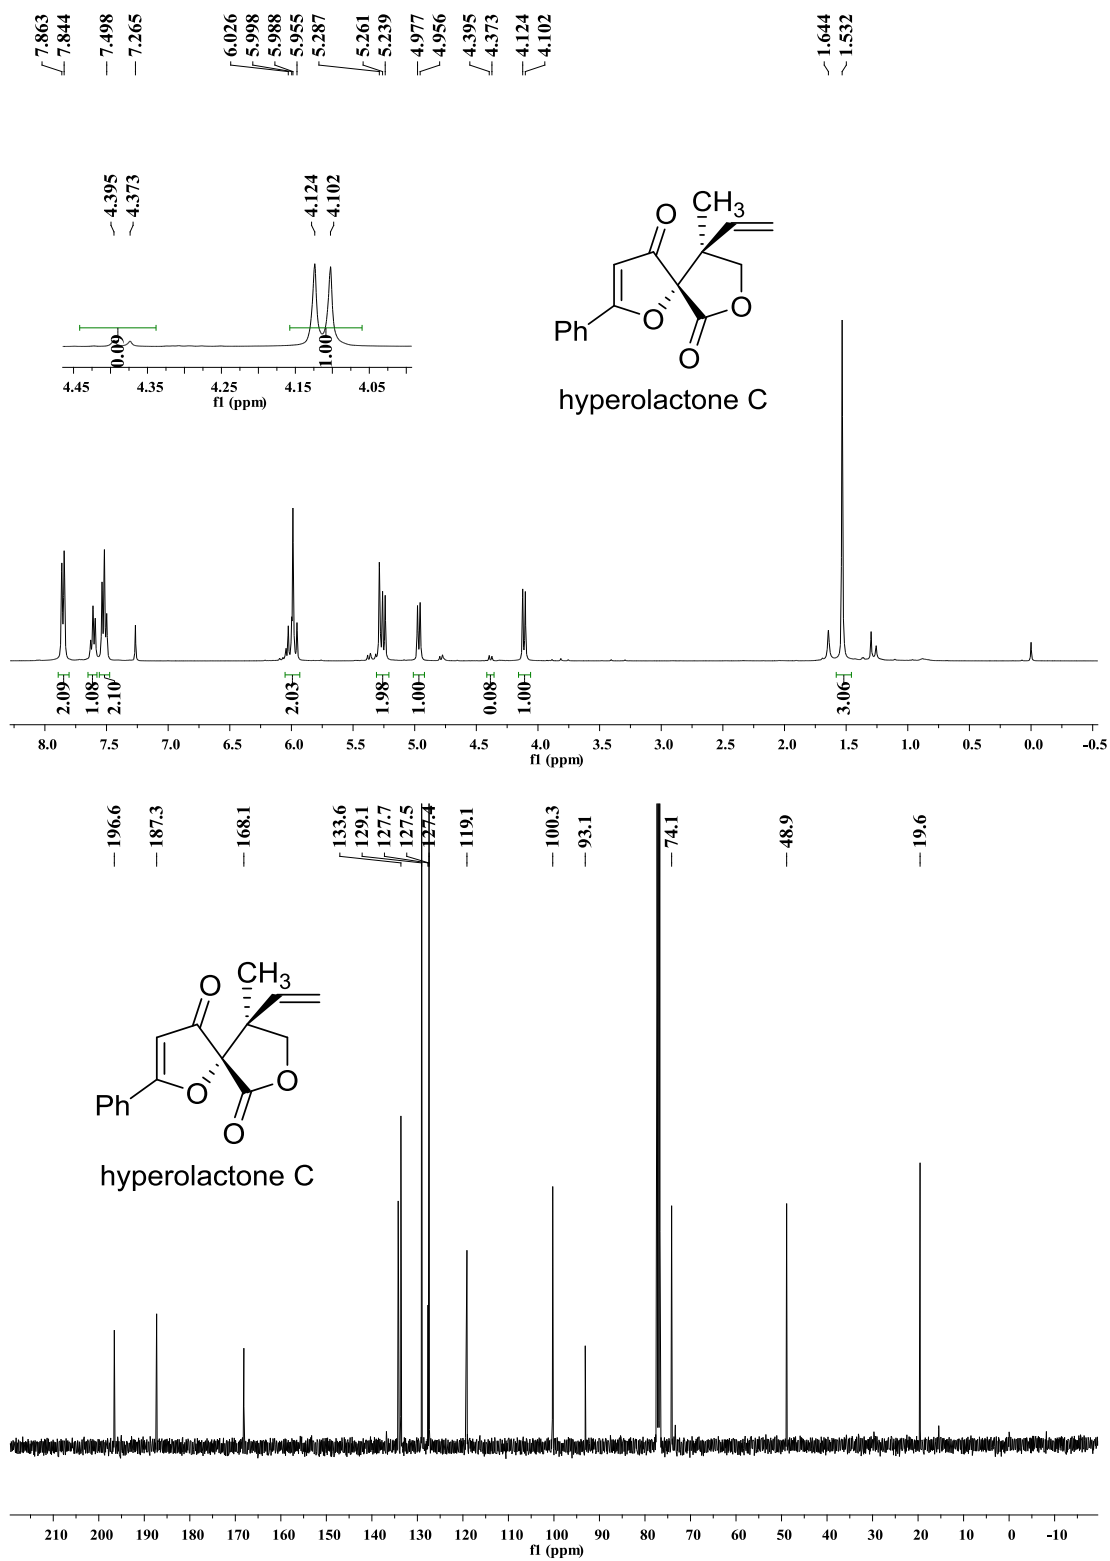

Supplementary Figure 60. <sup>1</sup>H and <sup>13</sup>C spectra for hyperlactone C

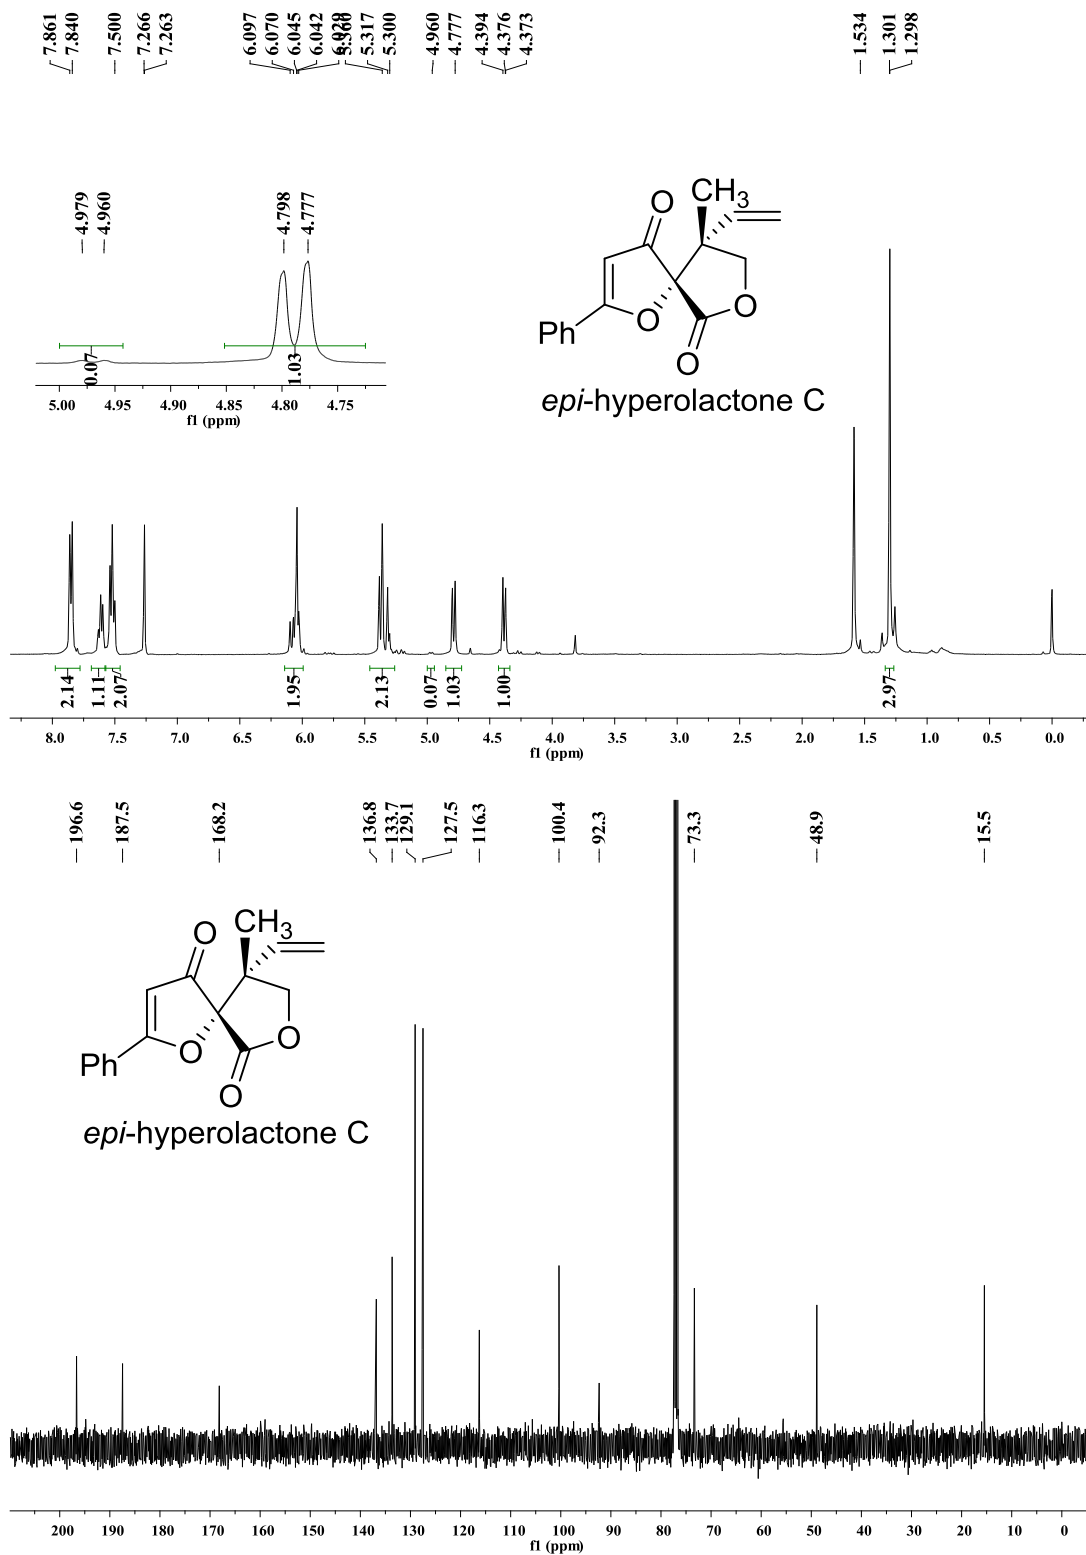

Supplementary Figure 61. <sup>1</sup>H and <sup>13</sup>C spectra for *epi*-hyperolactone C

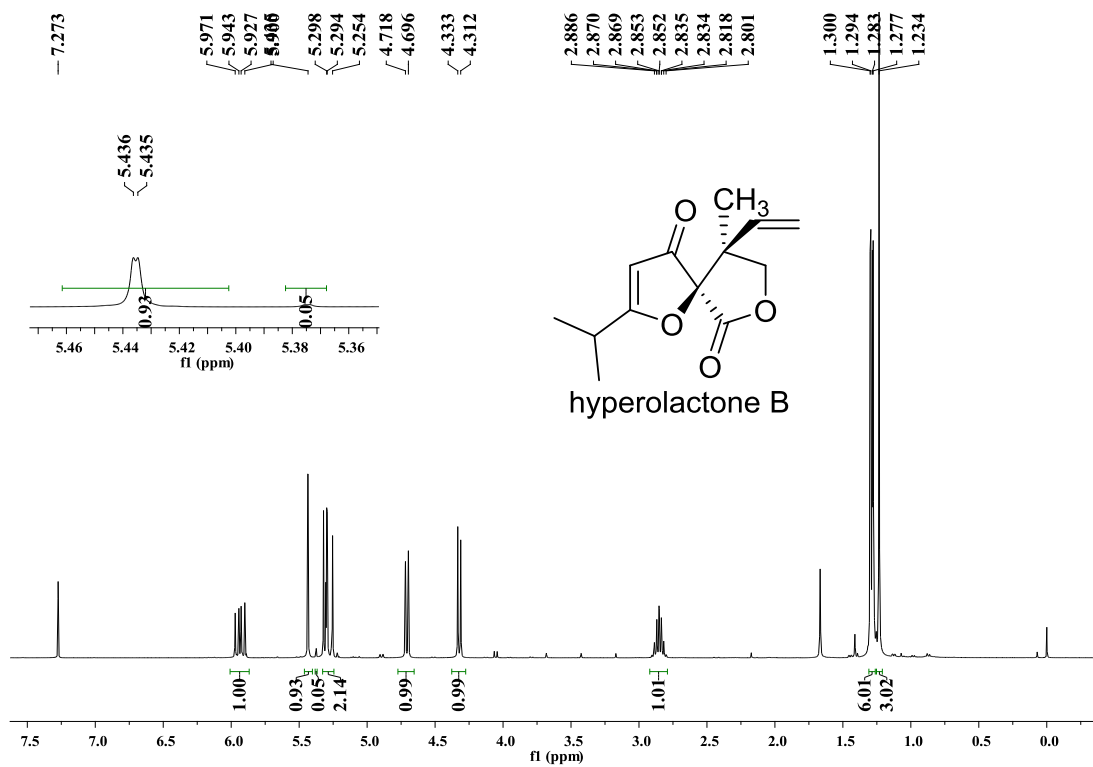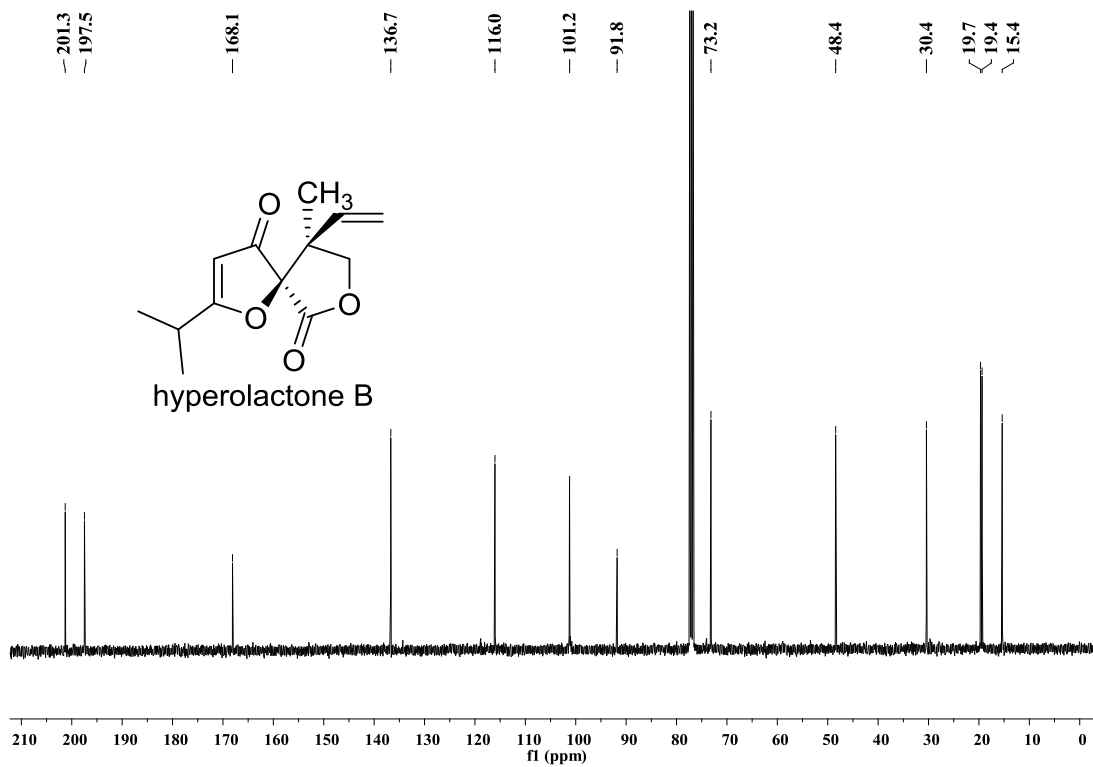

Supplementary Figure 62. <sup>1</sup>H and <sup>13</sup>C spectra for hyperolactone B

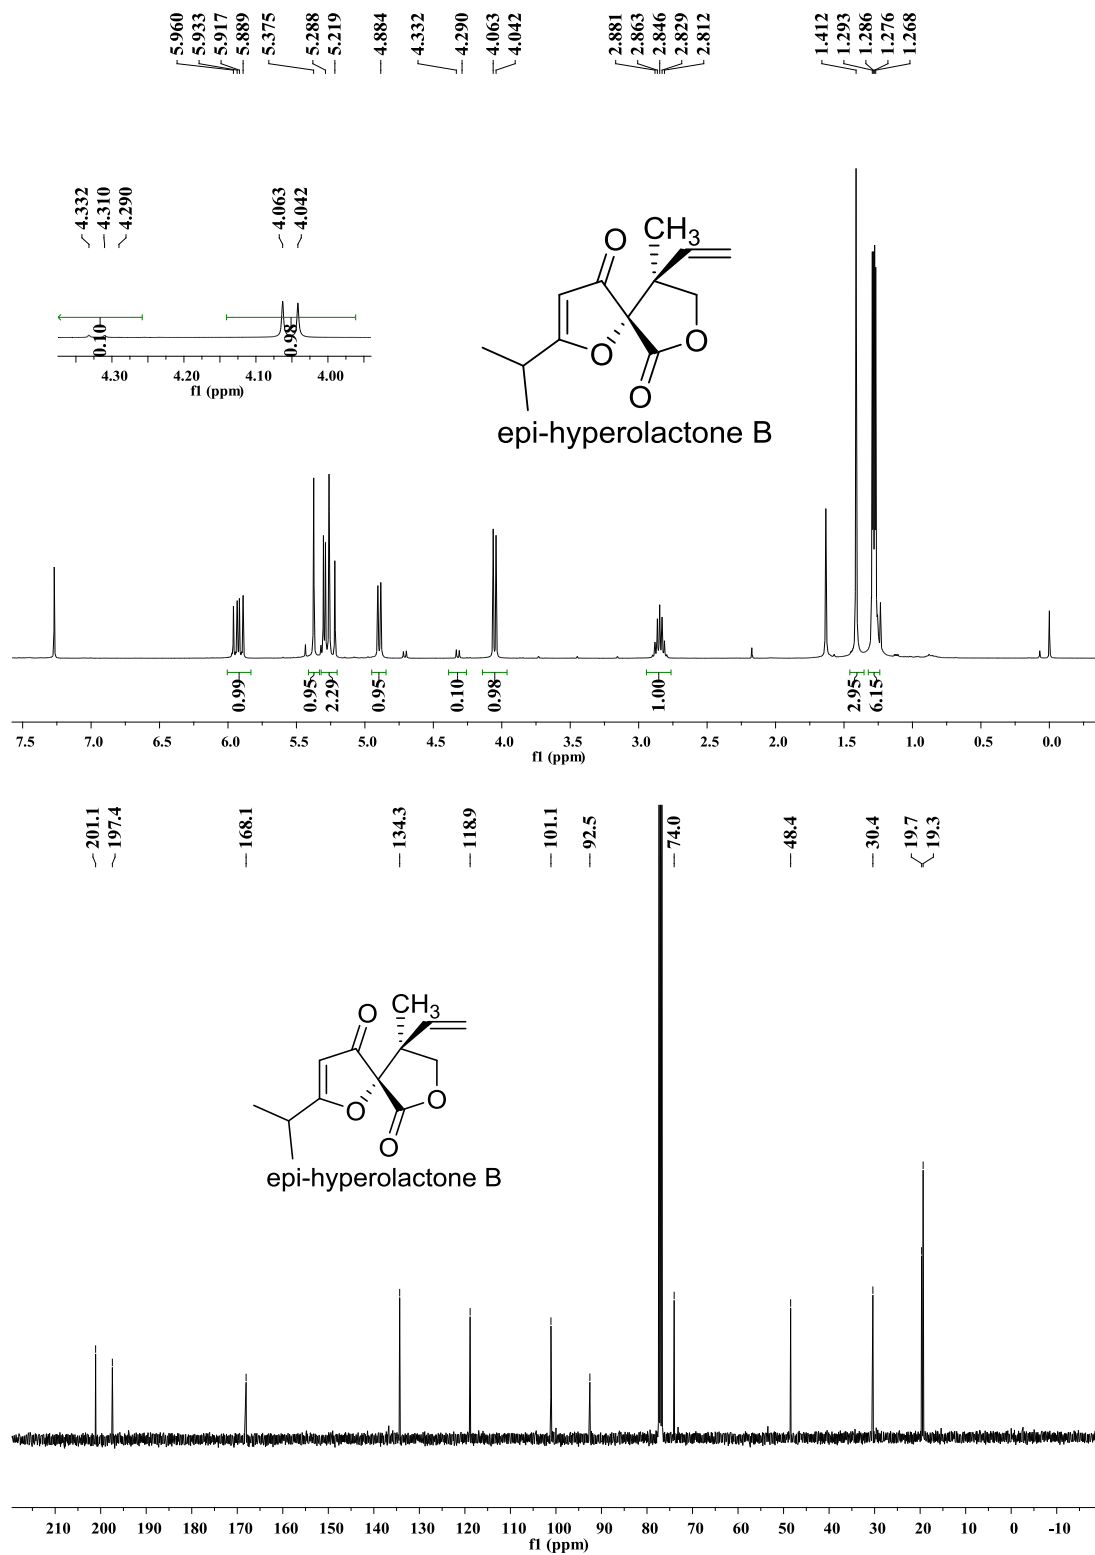

Supplementary Figure 63. <sup>1</sup>H and <sup>13</sup>C spectra for *epi*-hyperolactone B

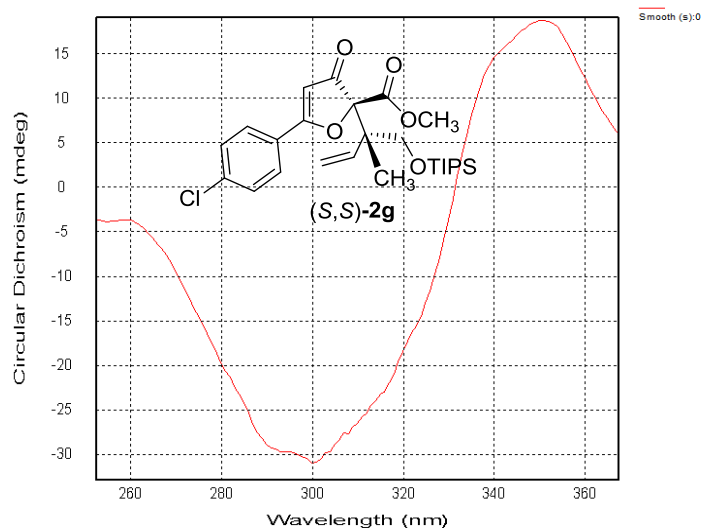

**Supplementary Figure 64.** CD spectra for the product (*S,S*)-**2g**

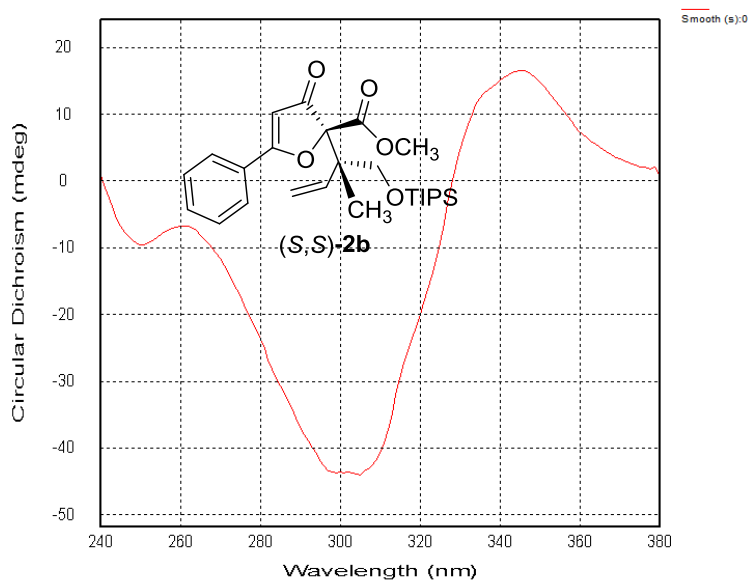

**Supplementary Figure 65.** CD spectra for the product (*S,S*)-**2b**

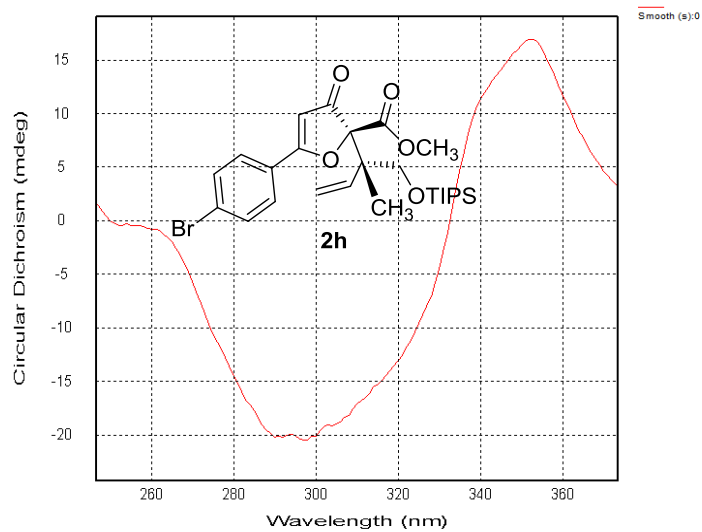

**Supplementary Figure 66. CD spectra for the product 2h**

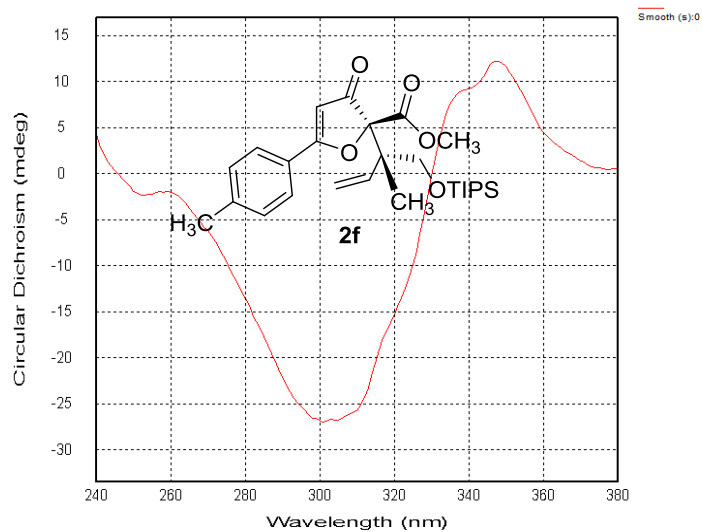

**Supplementary Figure 67. CD spectra for the product 2h**

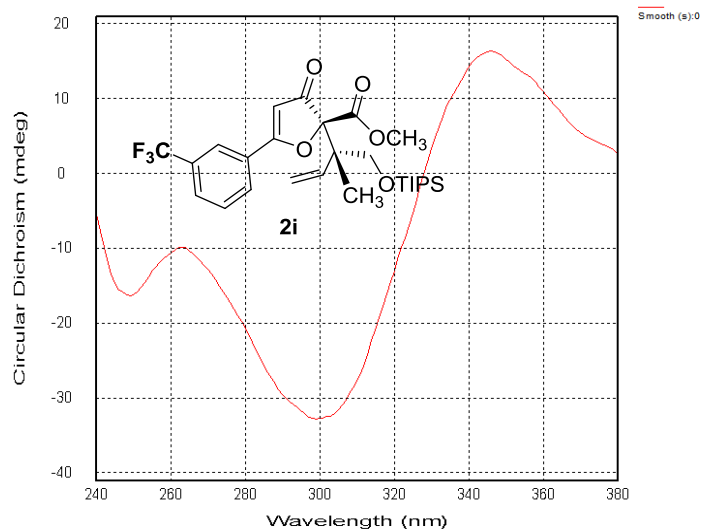

**Supplementary Figure 68. CD spectra for the product 2i**

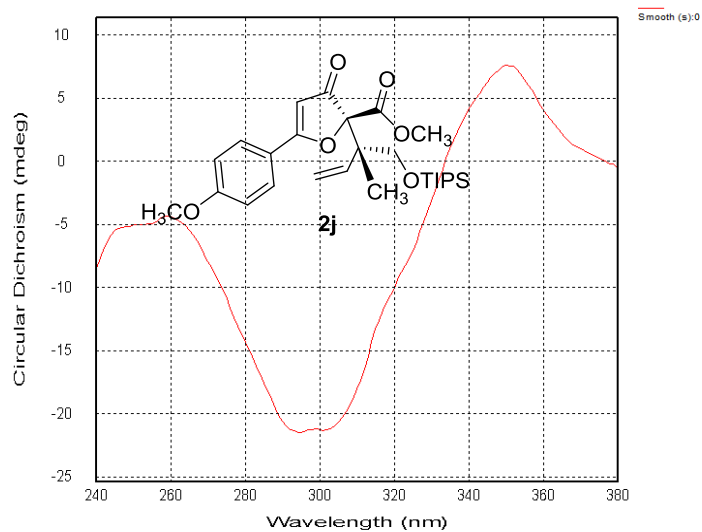

**Supplementary Figure 69. CD spectra for the product 2j**

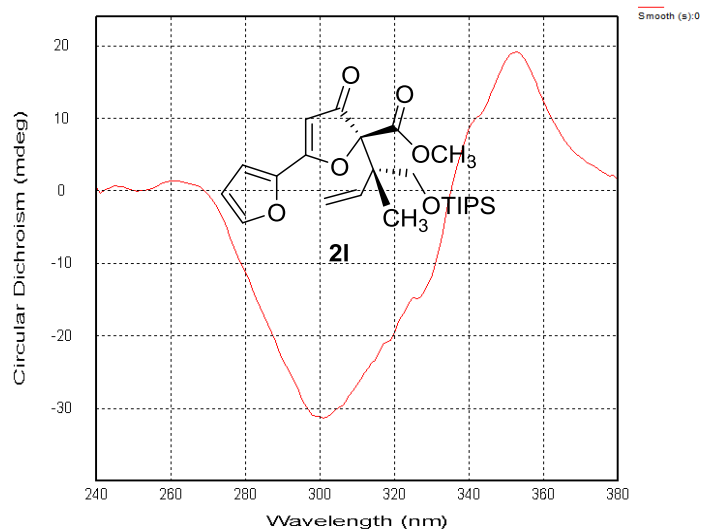

**Supplementary Figure 70. CD spectra for the product 21**

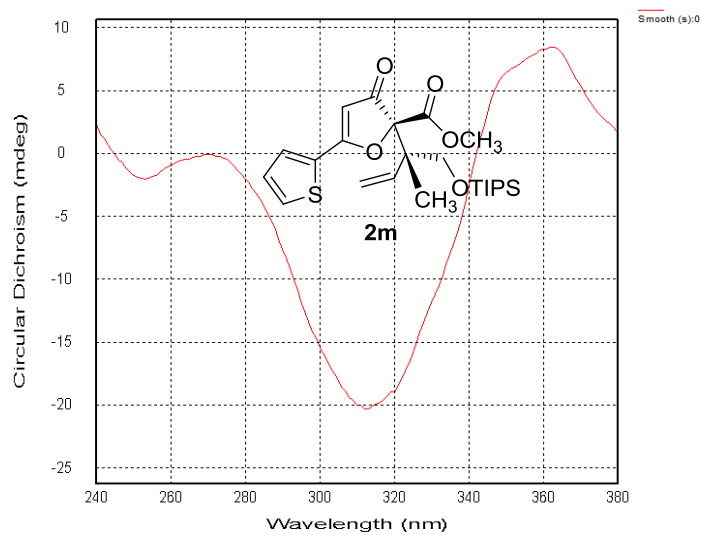

**Supplementary Figure 71. CD spectra for the product 2m**



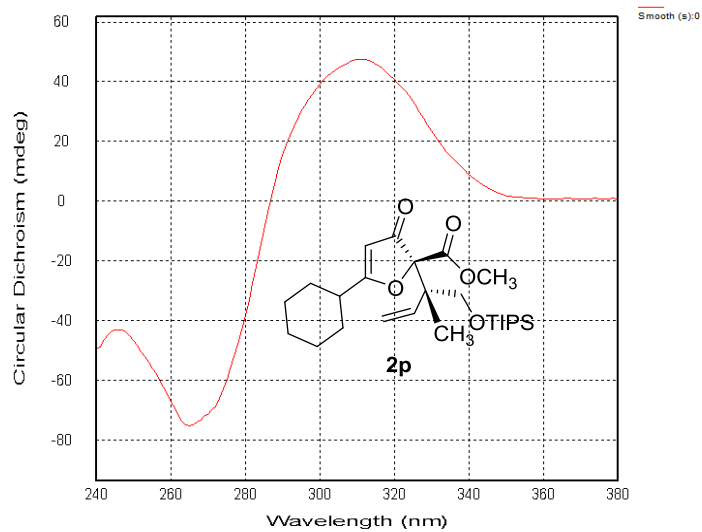

**Supplementary Figure 72.** CD spectra for the product **2p**

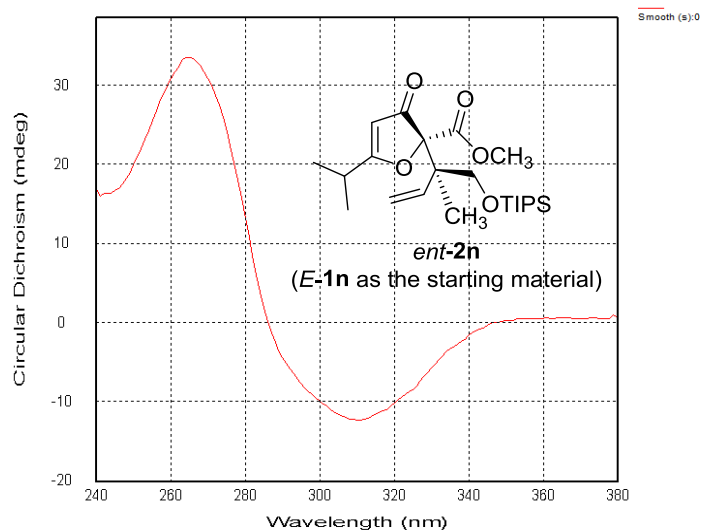

**Supplementary Figure 73.** CD spectra for the product *ent-2n*

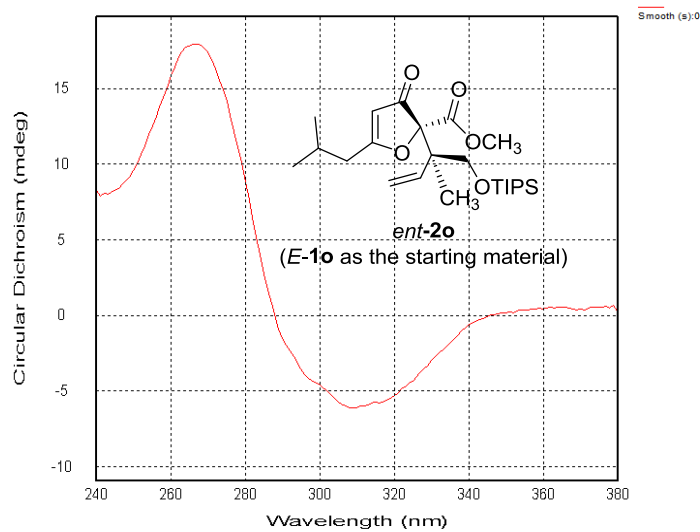

**Supplementary Figure 74.** CD spectra for the product *ent-2o*

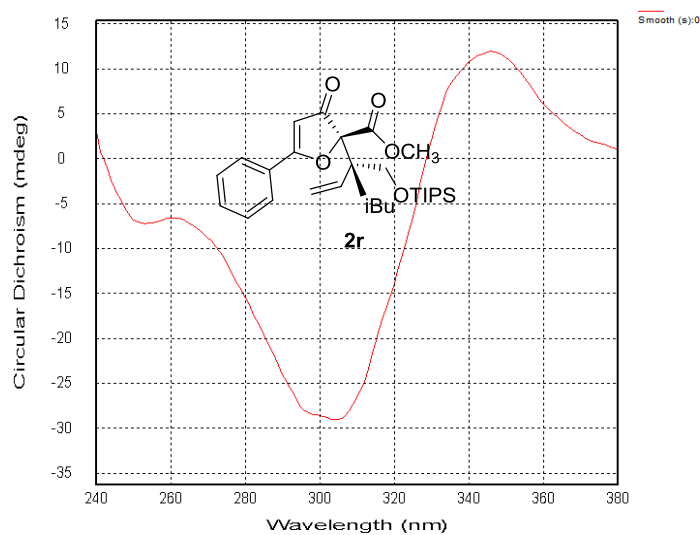

**Supplementary Figure 75.** CD spectra for the product **2r**

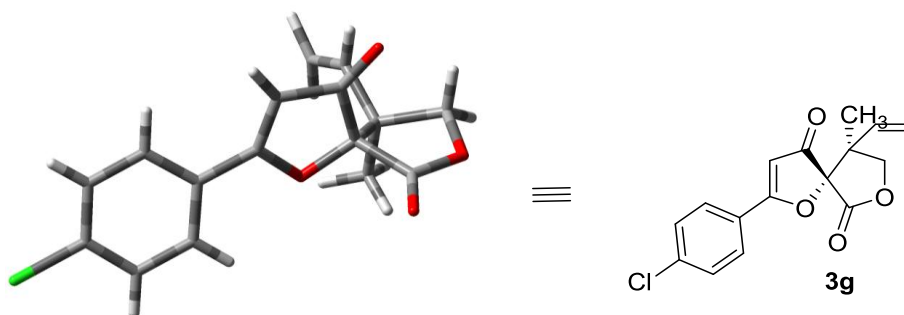

**Supplementary Figure 76.** X-ray crystal structure of the product **3g**

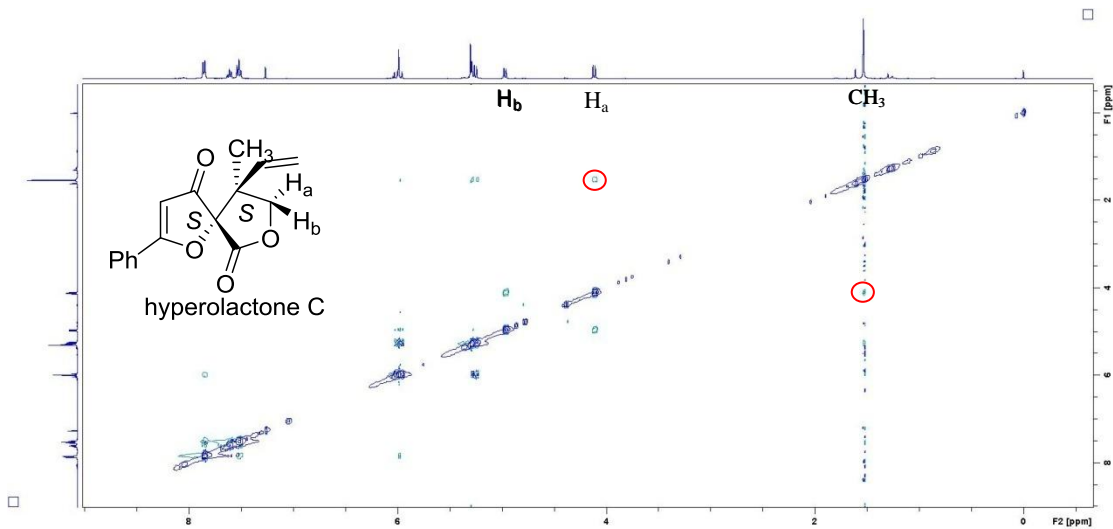

Supplementary Figure 77. NOE spectra of hyperolactone C<sup>1</sup>

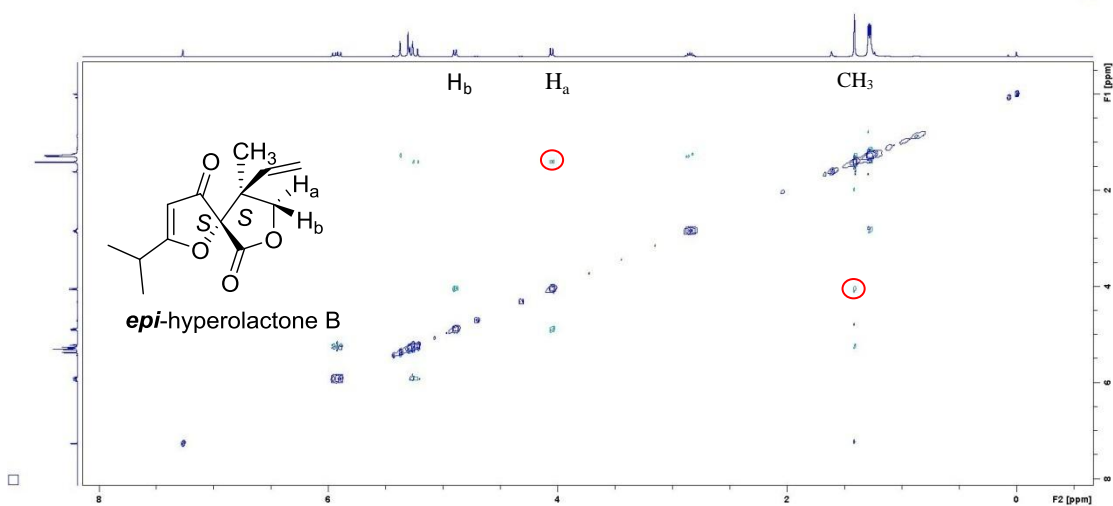

Supplementary Figure 78. NOE spectra of *epi*-hyperolactone C<sup>1</sup>

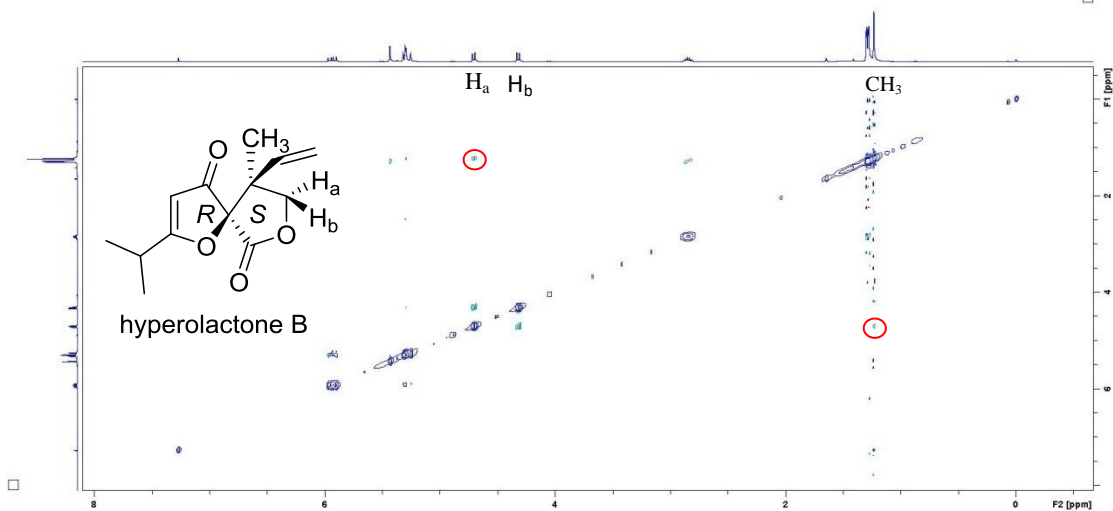

Supplementary Figure 79. NOE spectra of hyperolactone B<sup>1</sup>

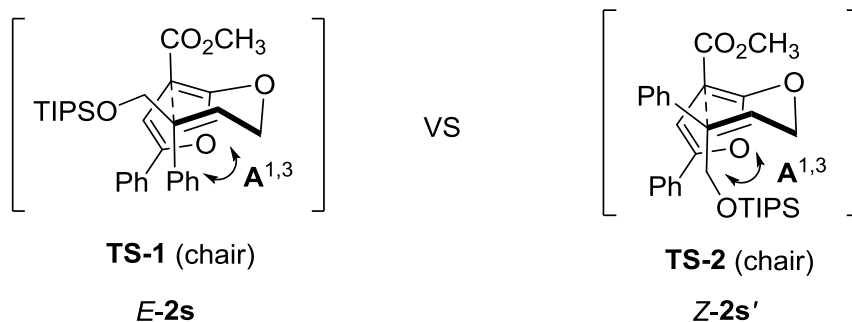

**Supplementary Figure 80.** 1,3-Repulsion interaction in the reaction model for *E*-2s and *Z*-2s'

## Supplementary Tables

**Supplementary Table 1.** Screening of the metal salts

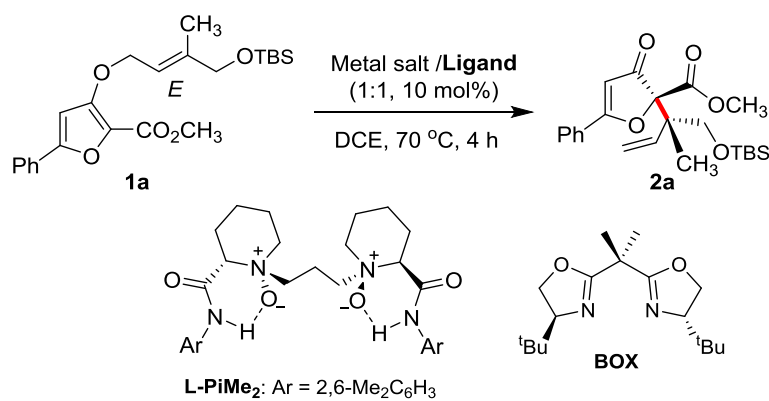

| Entry <sup>[a]</sup> | Metal salt/Ligand                         | Yield [%] <sup>[b]</sup> | dr <sup>[c]</sup> | Ee[%] <sup>[d]</sup> |
|----------------------|-------------------------------------------|--------------------------|-------------------|----------------------|
| 1                    | Mg(OTf) <sub>2</sub> /L-PiMe <sub>2</sub> | 85                       | 3:1               | 94                   |
| 2                    | Cu(OTf) <sub>2</sub> /L-PiMe <sub>2</sub> | trace                    | -                 | -                    |
| 3                    | Yb(OTf) <sub>3</sub> /L-PiMe <sub>2</sub> | 47                       | 3:1               | 33                   |
| 4                    | Ni(OTf) <sub>2</sub> /L-PiMe <sub>2</sub> | 85                       | 5:1               | 98                   |
| 5                    | Cu(OTf) <sub>2</sub> /BOX                 | trace                    | -                 | -                    |

[a] Unless otherwise noted, the reactions were performed with **1a** (0.1 mmol), metal/L-PiMe<sub>2</sub> (1:1, 10 mol%), in DCE (1.0 mL) at 70 °C for 4 hours. [b] Isolated yield. [c] The dr value was determined by <sup>1</sup>H NMR and HPLC analysis. [d] Determined by HPLC analysis on chiral stationary phases.

## Supplementary Table 2. Screening of the ligands

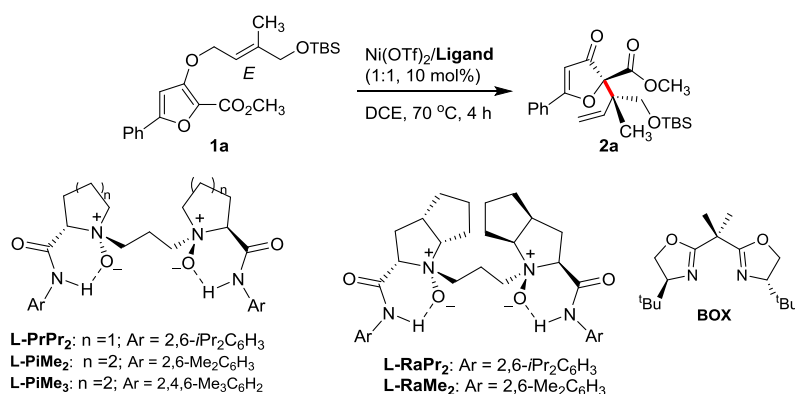

| Entry <sup>[a]</sup> | Ligand                    | Yield [%] <sup>[b]</sup> | dr <sup>[c]</sup> | Ee[%] <sup>[d]</sup> |
|----------------------|---------------------------|--------------------------|-------------------|----------------------|
| 1                    | <b>L-RaPr<sub>2</sub></b> | 60                       | 3:2               | 64                   |
| 2                    | <b>L-PrPr<sub>2</sub></b> | 35                       | 1:1               | 33                   |
| 3                    | <b>L-RaMe<sub>2</sub></b> | 90                       | 2:1               | 94                   |
| 4                    | <b>L-PiMe<sub>2</sub></b> | 85                       | 5:1               | 98                   |
| 5                    | <b>L-PiMe<sub>3</sub></b> | 85                       | 5:1               | 98                   |
| 6                    | <b>BOX</b>                | trace                    | -                 | -                    |

[a] Unless otherwise noted, the reactions were performed with **1a** (0.1 mmol), Ni(OTf)<sub>2</sub>/**Ligand** (1:1, 10 mol%), in DCE (1.0 mL) at 70 °C for 4 hours. [b] Isolated yield. [c] The dr value was determined by <sup>1</sup>H NMR and HPLC analysis. [d] Determined by HPLC analysis on chiral stationary phases.

## Supplementary Table 3. Screening of the solvents

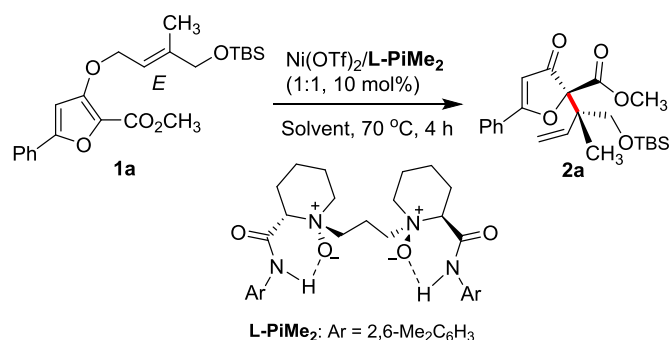

| Entry <sup>[a]</sup> | Solvent                              | Yield [%] <sup>[b]</sup> | dr <sup>[c]</sup> | Ee[%] <sup>[d]</sup> |
|----------------------|--------------------------------------|--------------------------|-------------------|----------------------|
| 1                    | CHCl <sub>3</sub>                    | 80                       | 5:1               | 98                   |
| 2                    | CHCl <sub>2</sub> CHCl <sub>2</sub>  | 82                       | 5:1               | 98                   |
| 3                    | DCE                                  | 85                       | 5:1               | 98                   |
| 4                    | CHCl <sub>2</sub> CH <sub>2</sub> Cl | 83                       | 4:1               | 98                   |

[a] Unless otherwise noted, the reactions were performed with **1a** (0.1 mmol), Ni(OTf)<sub>2</sub>/**L-PiMe<sub>2</sub>** (1:1, 10 mol%), in solvent (1.0 mL) at 70 °C for 4 hours. [b] Isolated yield. [c] The dr value was determined by <sup>1</sup>H NMR and HPLC analysis. [d] Determined by HPLC analysis on chiral stationary phases.

#### Supplementary Table 4. Screening of the silyl protecting group

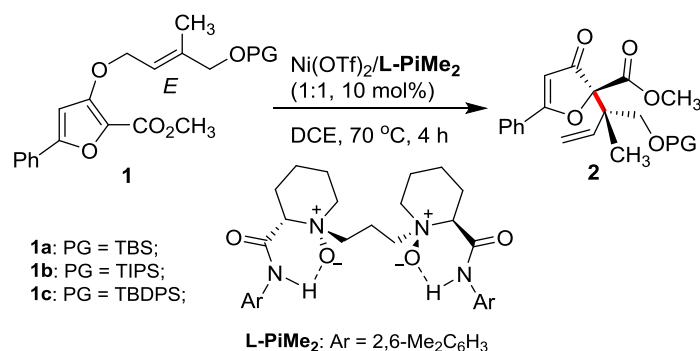

| Entry <sup>[a]</sup> | PG    | Yield [%] <sup>[b]</sup> | dr <sup>[c]</sup> | Ee[%] <sup>[d]</sup> |
|----------------------|-------|--------------------------|-------------------|----------------------|
| 1                    | TBS   | 85                       | 5:1               | 98                   |
| 2                    | TIPS  | 90                       | 8:1               | 98                   |
| 3                    | TBDPS | 90                       | 5:1               | 98                   |

[a] Unless otherwise noted, the reactions were performed with **1** (0.1 mmol), Ni(OTf)<sub>2</sub>/**L-PiMe<sub>2</sub>** (1:1, 10 mol%), in DCE (1.0 mL) at 70 °C for 4 hours. [b] Isolated yield. [c] The dr value was determined by <sup>1</sup>H NMR and HPLC analysis. [d] Determined by HPLC analysis on chiral stationary phases.

#### Supplementary Table 5. Screening of the metal counter ion

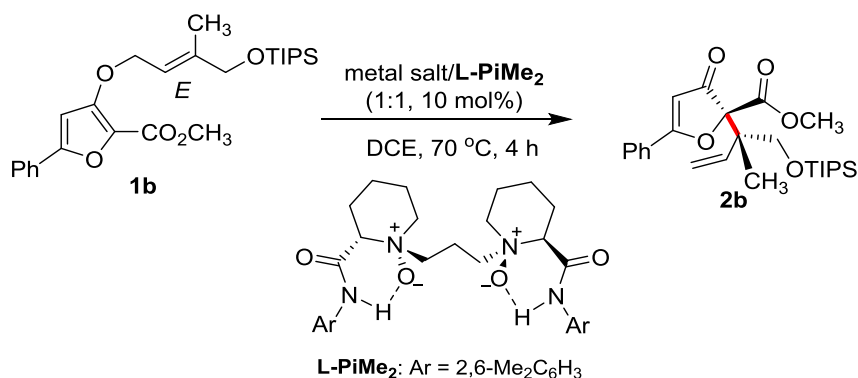

| Entry <sup>[a]</sup> | Metal salt                                           | Yield [%] <sup>[b]</sup> | dr <sup>[c]</sup> | Ee[%] <sup>[d]</sup> |
|----------------------|------------------------------------------------------|--------------------------|-------------------|----------------------|
| 1                    | Ni(BF <sub>4</sub> ) <sub>2</sub> ·6H <sub>2</sub> O | 96                       | 8:1               | 98                   |
| 2                    | Ni(OTf) <sub>2</sub> /NaBAr <sup>F</sup>             | 75                       | 4:1               | 92                   |

[a] Unless otherwise noted, the reactions were performed with **1b** (0.1 mmol), metal/**L-PiMe<sub>2</sub>** (1:1, 10 mol%), in DCE (1.0 mL) at 70 °C for 4 hours. [b] Isolated yield. [c] The dr value was determined by <sup>1</sup>H NMR and HPLC analysis. [d] Determined by HPLC analysis on chiral stationary phases.

### Supplementary Table 6. Screening of the reaction temperature

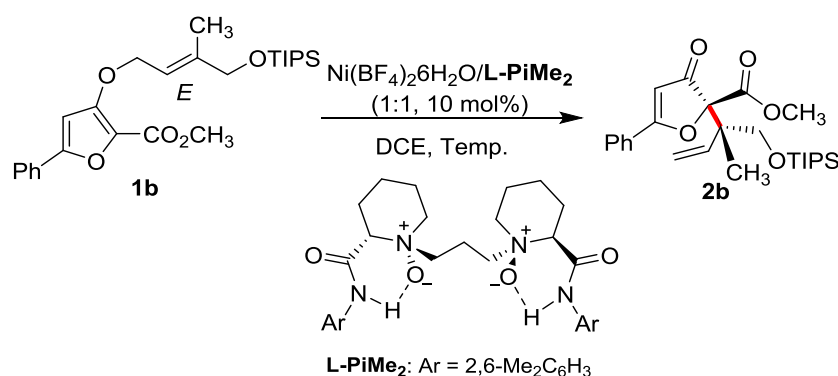

| Entry <sup>[a]</sup> | Temp. (°C) | Yield [%] <sup>[b]</sup> | dr <sup>[c]</sup> | Ee[%] <sup>[d]</sup> |
|----------------------|------------|--------------------------|-------------------|----------------------|
| 1                    | 70         | 96                       | 8:1               | 98                   |
| 2                    | 50         | 96                       | 9:1               | 99                   |
| 3 <sup>[e]</sup>     | 35         | 96                       | 10:1              | 99                   |
| 4 <sup>[e]</sup>     | 20         | 80                       | 10:1              | 99                   |

[a] Unless otherwise noted, the reactions were performed with **1b** (0.1 mmol), Ni(BF<sub>4</sub>)<sub>2</sub>·6H<sub>2</sub>O/**L-PiMe<sub>2</sub>** (1:1, 10 mol%), in DCE (1.0 mL) at the indicated temperature for 4-24h. [b] Isolated yield. [c] The dr value was determined by <sup>1</sup>H NMR and HPLC analysis. [d] Determined by HPLC analysis on chiral stationary phases. [e] React at the corresponding temperature for 4 days.

### Supplementary Table 7. Crystal data and structure refinement for **3g**

|                                    |                                                  |
|------------------------------------|--------------------------------------------------|
| Empirical formula                  | C <sub>16</sub> H <sub>13</sub> ClO <sub>4</sub> |
| Formula weight                     | 304.71                                           |
| Temperature/K                      | 296.9(3)                                         |
| Crystal system                     | orthorhombic                                     |
| Space group                        | P2 <sub>1</sub> 2 <sub>1</sub> 2 <sub>1</sub>    |
| a/Å                                | 7.5541(7)                                        |
| b/Å                                | 11.5427(11)                                      |
| c/Å                                | 16.9547(12)                                      |
| α/°                                | 90                                               |
| β/°                                | 90                                               |
| γ/°                                | 90                                               |
| Volume/Å <sup>3</sup>              | 1478.4(2)                                        |
| Z                                  | 4                                                |
| ρ <sub>calc</sub> /cm <sup>3</sup> | 1.369                                            |
| μ/mm <sup>-1</sup>                 | 2.409                                            |
| F(000)                             | 632.0                                            |
| Crystal size/mm <sup>3</sup>       | 0.75 × 0.6 × 0.4                                 |
| Radiation                          | CuKα (λ = 1.54184)                               |

2 $\Theta$  range for data collection/ $^{\circ}$  10.436 to 145.17  
 Index ranges  $-9 \leq h \leq 8, -14 \leq k \leq 14, -20 \leq l \leq 20$   
 Reflections collected 8132  
 Independent reflections 2875 [ $R_{\text{int}} = 0.0315, R_{\text{sigma}} = 0.0235$ ]  
 Data/restraints/parameters 2875/0/199  
 Goodness-of-fit on  $F^2$  1.048  
 Final R indexes [ $I \geq 2\sigma(I)$ ]  $R_1 = 0.0551, wR_2 = 0.1509$   
 Final R indexes [all data]  $R_1 = 0.0592, wR_2 = 0.1605$   
 Largest diff. peak/hole /  $e \text{ \AA}^{-3}$  0.22/-0.28  
 Flack parameter 0.003(11)

**Supplementary Table 8.** Optimization of the deprotection/lactonization conditions

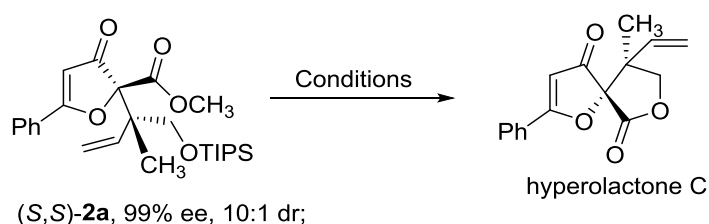

| Entry <sup>[a]</sup> | Conditions                                        | Yield [%] <sup>[b]</sup> | dr <sup>[c]</sup> | Ee[%] <sup>[d]</sup> |
|----------------------|---------------------------------------------------|--------------------------|-------------------|----------------------|
| 1                    | PPTS (4.0 equiv.)/DCE, 35 °C                      | No reaction              | -                 | -                    |
| 2                    | PPTS(4.0 equiv.)/DCE, 80 °C                       | No reaction              |                   |                      |
| 3                    | TBAF(1 equiv.)/ THF                               | No reaction              |                   |                      |
| 4                    | TBAF(10 equiv.)/ THF                              | Complex                  |                   |                      |
| 5                    | HF.pyridine (4 equiv.)/ CH <sub>3</sub> CN, 35 °C | No reaction              |                   |                      |
| 6                    | HF.pyridine (4 equiv.)/ CH <sub>3</sub> CN, 70 °C | No reaction              |                   |                      |
| 7                    | TMSBr(4 equiv.)/CH <sub>3</sub> OH/DCM, 35 °C     | 91%                      | 10:1              | 99                   |

[a] Unless otherwise noted, the reactions were performed with (*S,S*)-**2a** (22.9 mg, 0.05 mmol) in Solvent at corresponding conditions, TLC analysis. [b] Isolated yield. [c] The dr value was determined by <sup>1</sup>H NMR and HPLC analysis. [d] Determined by HPLC analysis on chiral stationary phases.



## Supplementary Method

### General information

$^1\text{H}$  NMR spectra were recorded on commercial instruments (400 MHz). Chemical shifts were reported in ppm from tetramethylsilane with the solvent resonance as the internal standard ( $\text{CDCl}_3$ ,  $\delta = 7.26$ ). Spectra were reported as follows: chemical shift ( $\delta$  ppm), multiplicity (s = singlet, d = doublet, t = triplet, q = quartet, m = multiplet), coupling constants (Hz), integration and assignment.  $^{13}\text{C}$  NMR spectra were collected on commercial instruments (100 MHz) with complete proton decoupling. Chemical shifts are reported in ppm from the tetramethylsilane with the solvent resonance as internal standard ( $\text{CDCl}_3$ ,  $\delta = 77.0$ ).

Enantiomeric excesses (*ee*) were determined by HPLC analysis using the corresponding commercial chiralpak column as stated in the experimental procedures at 25 °C. The chiralpak column Lux 5u Cellulose-2 was purchased from phenomenex company. Optical rotations were reported as follows:  $[\alpha]_{\text{D}}^{25}$  (*c*: g/100 mL, in solvent). HRMS was recorded on a commercial apparatus (ESI Source).

All catalytic reactions were run in dried glassware. THF, toluene and diethyl ether ( $\text{Et}_2\text{O}$ ) were distilled from sodium.  $\text{CH}_2\text{Cl}_2$ ,  $\text{ClCH}_2\text{CH}_2\text{Cl}$  and HMPA were distilled over  $\text{CaH}_2$ . Cinnamyl bromide and (2, 2, 2-trifluoroethyl)-methoxycarbonylmethyl-phosphonate were purchased from Adamas-beta®.

All racemic products were obtained by using  $\text{Ni}(\text{OTf})_2$  (10 mmol%) in concert with racemic *N,N'*-dioxide ligand (**L-PiMe**<sub>2</sub> or **L-PiMe**<sub>3</sub>, 10 mmol%) at 70 °C.

### General procedure for the synthesis of *E*-substrates (1a-1q)

The substituted furans (**3a-3p**) were synthesized according to the previous works<sup>2,3</sup>.

The (*E*)-4-chloro-2-methylbut-2-en-1-ol **4** was synthesized on the basis of Rohdich's general procedure<sup>4</sup>.

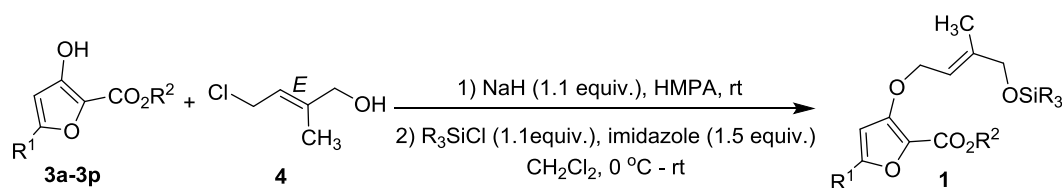

**Step 1:** Substituted furan (**3a-3p**, 1.0 mmol, 1.0 equiv.) was dissolved in dry HMPA (5 mL). At room temperature, NaH (26.4 mg, 1.1 mmol, 1.1 equiv.) was added. After 1 hour, (*E*)-4-chloro-2-methylbut-2-en-1-ol (**4**, 180 mg, 1.5 mmol, 1.5 equiv.) in HMPA was added in drops. The mixture was stirred at room temperature overnight. Then 10 mL of saturated aq.  $\text{NH}_4\text{Cl}$  solution was added to quench the reaction. The solution was extracted thrice with ethyl acetate, washed thrice with brine, and dried over  $\text{Na}_2\text{SO}_4$ . Evaporation of solvent and purification by flash chromatography (hexane/ethyl acetate, 2:1) afforded the mixture containing the *O*-alkylation product and the *C*-alkylation product, which were directly used in the next step.

**Step 2:** The mixture was dissolved in dichloromethane (10 mL) at 0 °C, the imidazole (1.5 equiv.) and  $\text{R}_3\text{SiCl}$  (1.1 equiv.) were added in sequence. The mixture was stirred at room temperature for 5 hours. After the reaction completing, 10 mL of  $\text{H}_2\text{O}$  was added to quench the reaction. The solution was extracted thrice with dichloromethane, washed with brine, and dried over  $\text{Na}_2\text{SO}_4$ .

Evaporation of solvent and purification by flash chromatography (hexane/ethyl acetate, 20:1), the desired products (**1a-1q**) could be obtained.

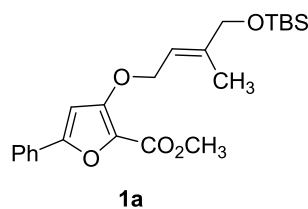

**Methyl-(E)-3-((4-((tert-butyldimethylsilyl)oxy)-3-methylbut-2-en-1-yl)oxy)-5-phenylfuran-2-carboxylate (**1a**):** Synthesized by the general procedure. Yield reported over two steps.

**Yield:** 199 mg, 0.48 mmol, 48% yield (clear oil);

**<sup>1</sup>H NMR** (400 MHz, CDCl<sub>3</sub>) δ 7.69 (d, *J* = 7.2 Hz, 2H), 7.36 – 7.29 (m, 3H), 6.54 (s, 1H), 5.82 – 5.68 (m, 1H), 4.71 (d, *J* = 6.4 Hz, 2H), 4.01 (s, 2H), 3.84 (s, 3H), 1.68 (s, 3H), 0.84 (s, 9H), 0.00 (s, 6H);

**<sup>13</sup>C NMR** (101 MHz, CDCl<sub>3</sub>) δ 159.3, 155.5, 155.4, 140.5, 129.3, 128.8, 128.0, 124.8, 118.1, 98.1, 68.4, 67.4, 51.4, 25.9, 18.4, 13.9, 5.4;

**HRMS** (ESI) calcd for [M+H]<sup>+</sup>: C<sub>23</sub>H<sub>33</sub>O<sub>5</sub>Si, *m/z*: 417.2091, observed: 417.2095.

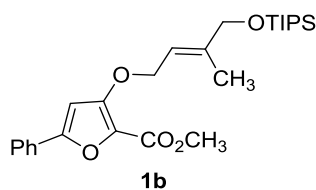

**Methyl-(E)-3-((3-methyl-4-((triisopropylsilyl)oxy)but-2-en-1-yl)oxy)-5-phenylfuran-2-carboxylate (**1b**):** Synthesized by the general procedure. Yield reported over two steps.

**Yield:** 206 mg, 0.45 mmol, 45% yield (clear oil)

**<sup>1</sup>H NMR** (400 MHz, CDCl<sub>3</sub>) δ 7.66 (d, *J* = 7.2 Hz, 2H), 7.34 – 7.25 (m, 3H), 6.52 (s, 1H), 5.78 (dd, *J* = 6.8, 5.6 Hz, 1H), 4.71 (d, *J* = 6.4 Hz, 2H), 4.06 (s, 2H), 3.82 (s, 3H), 1.66 (s, 3H), 1.04 – 0.90 (m, 21H);

**<sup>13</sup>C NMR** (101 MHz, CDCl<sub>3</sub>) δ 159.4, 155.5, 155.3, 140.6, 129.4, 129.3, 128.8, 128.1, 124.8, 117.8, 98.1, 68.3, 67.4, 51.4, 18.0, 13.9, 12.0;

**HRMS** (ESI) calcd for [M+H]<sup>+</sup>: C<sub>26</sub>H<sub>39</sub>O<sub>5</sub>Si, *m/z*: 459.2567, observed: 459.2571;

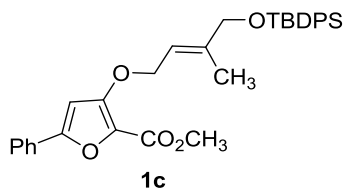

**Methyl-(E)-3-((4-((tert-butyldiphenylsilyl)oxy)-3-methylbut-2-en-1-yl)oxy)-5-phenylfuran-2-carboxylate (**1c**):** Synthesized by the general procedure. Yield reported over two steps.

**Yield:** 216 mg, 0.40 mmol, 40% yield (clear oil);

**<sup>1</sup>H NMR** (400 MHz, CDCl<sub>3</sub>) δ 7.74 (d, *J* = 7.2 Hz, 2H), 7.69 – 7.59 (m, 4H), 7.42 – 7.32 (m, 9H), 6.60 (s, 1H), 5.92 (t, *J* = 6.0 Hz, 1H), 4.79 (d, *J* = 6.0 Hz, 2H), 4.09 (s, 2H), 3.91 (s, 3H), 1.72 (s, 3H), 1.04 (s, 9H).

**<sup>13</sup>C NMR** (101 MHz, CDCl<sub>3</sub>) δ 159.4, 155.5, 155.3, 140.2, 135.5, 133.4, 129.7, 129.3, 128.8, 128.1, 127.7, 124.9, 118.2, 98.1, 68.4, 67.8, 51.4, 26.8, 19.3, 14.0;

**HRMS** (ESI) calcd for [M+Na]<sup>+</sup>: C<sub>33</sub>H<sub>36</sub>O<sub>5</sub>SiNa, *m/z*: 563.2224, observed: 563.2226;

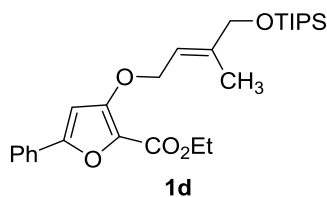

**Ethyl-(*E*)-3-((3-methyl-4-((triisopropylsilyl)oxy)but-2-en-1-yl)oxy)-5-phenylfuran-2-carboxylate (1d)**; Synthesized by the general procedure. Yield reported over two steps.

**Yield:** 198 mg, 0.42 mmol, 42% yield (clear oil)

**<sup>1</sup>H NMR** (400 MHz, CDCl<sub>3</sub>) δ 7.74 – 7.72 (m, 2H), 7.40 – 7.28 (m, 3H), 6.60 (s, 1H), 5.86 (t, *J* = 6.4 Hz, 1H), 4.76 (d, *J* = 6.4 Hz, 2H), 4.36 (dd, *J* = 7.2, 14.4 Hz, 2H), 4.13 (s, 2H), 1.73 (s, 3H), 1.37 (t, *J* = 7.2 Hz, 3H), 1.14 – 1.03 (m, 21H);

**<sup>13</sup>C NMR** (101 MHz, CDCl<sub>3</sub>) δ 159.0, 155.2, 140.4, 129.4, 129.1, 128.7, 128.3, 124.7, 117.8, 98.2, 68.3, 67.4, 60.2, 18.0, 14.5, 13.8, 12.0;

**HRMS** (ESI) calcd for [M+H]<sup>+</sup>: C<sub>27</sub>H<sub>41</sub>O<sub>5</sub>Si, *m/z*: 473.2717, observed: 473.2727.

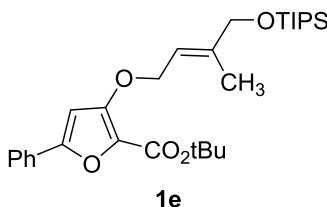

**Tert-butyl-(*E*)-3-((3-methyl-4-((triisopropylsilyl)oxy)but-2-en-1-yl)oxy)-5-phenylfuran-2-carboxylate (1e)**; Synthesized by the general procedure. Yield reported over two steps.

**Yield:** 200 mg, 0.4 mmol, 40% yield (clear oil)

**<sup>1</sup>H NMR** (400 MHz, CDCl<sub>3</sub>) δ 7.73 (d, *J* = 7.2 Hz, 2H), 7.41 – 7.29 (m, 3H), 6.58 (s, 1H), 5.86 (t, *J* = 6.4 Hz, 1H), 4.75 (d, *J* = 6.4 Hz, 2H), 4.14 (s, 2H), 1.73 (s, 3H), 1.60 (s, 9H), 1.11 – 1.07 (m, 3H), 1.05 – 1.02 (m, 18H);

**<sup>13</sup>C NMR** (101 MHz, CDCl<sub>3</sub>) δ 158.6, 154.6, 154.5, 140.2, 129.6, 129.0, 128.7, 124.7, 117.9, 98.1, 81.1, 68.3, 67.4, 28.5, 18.0, 13.9, 12.0;

**HRMS** (ESI) calcd for [M+H]<sup>+</sup>: C<sub>29</sub>H<sub>45</sub>O<sub>5</sub>Si, *m/z*: 501.3030, observed: 501.3027.

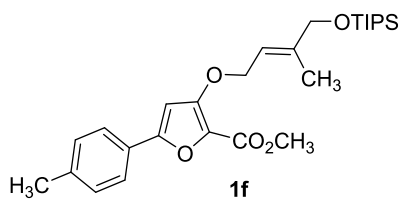

**Methyl-(*E*)-3-((3-methyl-4-((triisopropylsilyl)oxy)but-2-en-1-yl)oxy)-5-(*p*-tolyl)furan-2-carboxylate (1f)**; Synthesized by the general procedure. Yield reported over two steps.

**Yield:** 217 mg, 0.46 mmol, 46% yield (clear oil)

**<sup>1</sup>H NMR** (400 MHz, CDCl<sub>3</sub>) δ 7.63 (d, *J* = 6.8 Hz, 2H), 7.20 (d, *J* = 7.6 Hz, 2H), 6.54 (d, *J* = 1.6 Hz, 1H), 5.91 – 5.81 (m, 1H), 4.77 (d, *J* = 6.4 Hz, 2H), 4.14 (s, 2H), 3.89 (d, *J* = 1.2 Hz, 3H), 2.37 (s, 3H), 1.73 (s, 3H), 1.08 – 0.94 (m, 21H);

**<sup>13</sup>C NMR** (101 MHz, CDCl<sub>3</sub>) δ 159.4, 155.8, 155.5, 140.5, 139.4, 129.4, 127.7, 126.7, 124.8, 117.8, 97.5, 68.3, 67.5, 51.3, 21.4, 18.0, 13.9, 12.0;

**HRMS** (ESI) calcd for [M+H]<sup>+</sup>: C<sub>27</sub>H<sub>41</sub>O<sub>5</sub>Si, *m/z*: 473.2717, observed: 473.2726.

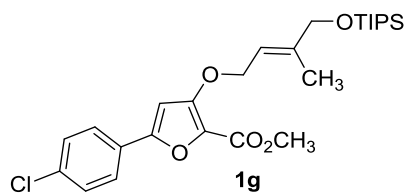

**Methyl-(*E*)-5-(4-chlorophenyl)-3-((3-methyl-4-((triisopropylsilyl)oxy)but-2-en-1-yl)oxy)furan-2-carboxylate (1g)**; Synthesized by the general procedure. Yield reported over two steps.

**Yield:** 212 mg, 0.43 mmol, 43% yield (clear oil)

**<sup>1</sup>H NMR** (400 MHz, CDCl<sub>3</sub>) δ 7.70 – 7.64 (m, 2H), 7.45 – 7.33 (m, 2H), 6.58 (s, 1H), 5.91 – 5.79 (m, 1H), 4.78 (d, *J* = 6.4 Hz, 2H), 4.14 (s, 2H), 3.89 (s, 3H), 1.74 (s, 3H), 1.10 – 1.00 (m, 21H);

**<sup>13</sup>C NMR** (101 MHz, CDCl<sub>3</sub>) δ 159.2, 155.2, 154.2, 140.7, 135.1, 129.0, 128.3, 127.8, 126.0, 117.6, 98.5, 68.4, 67.4, 51.4, 18.0, 13.9, 12.0;

**HRMS** (ESI) calcd for [M+H]<sup>+</sup>: C<sub>26</sub>H<sub>38</sub>ClO<sub>5</sub>Si, *m/z*: 493.2172, 494.2205, observed: 493.2172, 494.2199.

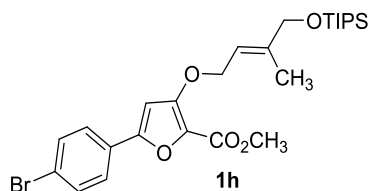

**Methyl-(*E*)-5-(4-bromophenyl)-3-((3-methyl-4-((triisopropylsilyl)oxy)but-2-en-1-yl)oxy)furan-2-carboxylate (1h)**; Synthesized by the general procedure. Yield reported over two steps.

**Yield:** 231 mg, 0.43 mmol, 43% yield (clear oil)

**<sup>1</sup>H NMR** (400 MHz, CDCl<sub>3</sub>) δ 7.60 (d, *J* = 8.4 Hz, 2H), 7.54 (d, *J* = 8.4 Hz, 2H), 6.59 (s, 1H), 5.85 (dd, *J* = 6.4, 5.2 Hz, 1H), 4.78 (d, *J* = 6.8 Hz, 2H), 4.14 (s, 2H), 3.89 (s, 3H), 1.73 (s, 3H), 1.10 – 1.00 (m, 21H);

**<sup>13</sup>C NMR** (101 MHz, CDCl<sub>3</sub>) δ 159.3, 155.1, 154.2, 140.7, 132.0, 128.3, 126.2, 123.4, 117.6, 98.6, 68.4, 67.4, 51.4, 18.0, 13.9, 12.0;

**HRMS** (ESI) calcd for [M+H]<sup>+</sup>: C<sub>26</sub>H<sub>38</sub>BrO<sub>5</sub>Si, *m/z*: 537.1666, 539.1646, observed: 537.1672, 539.1653.

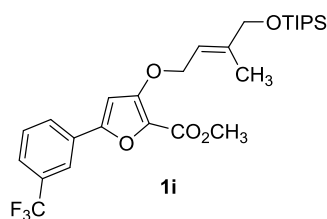

**Methyl-(*E*)-3-((3-methyl-4-((triisopropylsilyl)oxy)but-2-en-1-yl)oxy)-5-(3-(trifluoromethyl)phenyl)furan-2-carboxylate (1i)**; Synthesized by the general procedure. Yield reported over two steps.

**Yield:** 210 mg, 0.4 mmol, 40% yield (clear oil)

**<sup>1</sup>H NMR** (400 MHz, CDCl<sub>3</sub>) δ 7.95 (s, 1H), 7.91 (d, *J* = 7.6 Hz, 1H), 7.64 – 7.48 (m, 2H), 6.71 (s, 1H), 5.88 (s, 1H), 4.81 (d, *J* = 6.4 Hz, 2H), 4.15 (s, 2H), 3.91 (s, 3H), 1.74 (s, 3H), 1.15 – 0.99 (m, 21H);

**<sup>13</sup>C NMR** (101 MHz, CDCl<sub>3</sub>) δ 159.1, 155.0, 153.5, 140.8, 131.3 (q, *J* = 33 Hz), 130.1, 129.3, 128.7, 127.8, 125.5 (q, *J* = 4 Hz), 123.8 (q, *J* = 270 Hz), 121.4 (q, *J* = 4 Hz), 117.4, 99.3, 68.4, 67.3, 51.4, 17.9, 13.8, 11.9;

**HRMS** (ESI) calcd for [M+H]<sup>+</sup>: C<sub>27</sub>H<sub>38</sub>F<sub>3</sub>O<sub>5</sub>Si, *m/z*: 527.2435, 528.2469, observed: 527.2435,

528.2462.

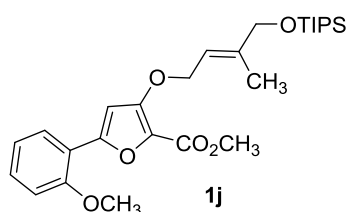

**Methyl-(*E*)-5-(2-methoxyphenyl)-3-((3-methyl-4-((triisopropylsilyl)oxy)but-2-en-1-yl)oxy)furan-2-carboxylate (1j)**; Synthesized by the general procedure. Yield reported over two steps.

**Yield:** 229 mg, 0.47 mmol, 47% yield (clear oil)

**<sup>1</sup>H NMR** (400 MHz, CDCl<sub>3</sub>) δ 7.32–7.30 (m, 2H), 7.28–7.25 (m, 1H), 6.96–6.86 (m, 1H), 6.59–6.58 (m, 1H), 5.87–5.84 (m, 1H), 4.78 (d, *J* = 6.4 Hz, 2H), 4.14 (s, 2H), 3.90 (d, *J* = 1.4 Hz, 3H), 3.86 (d, *J* = 1.4 Hz, 3H), 1.74 (s, 3H), 1.10–0.99 (m, 21H);

**<sup>13</sup>C NMR** (101 MHz, CDCl<sub>3</sub>) δ 159.9, 159.4, 155.3, 140.6, 130.6, 129.8, 128.1, 117.7, 117.4, 115.3, 109.9, 98.4, 68.4, 67.4, 55.4, 51.4, 18.0, 13.9, 12.0;

**HRMS** (ESI) calcd for [M+H]<sup>+</sup>: C<sub>27</sub>H<sub>41</sub>O<sub>6</sub>Si, *m/z*: 489.2667, observed: 489.2662.

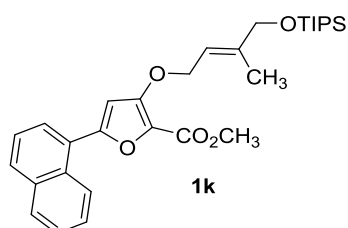

**Methyl-(*E*)-3-((3-methyl-4-((triisopropylsilyl)oxy)but-2-en-1-yl)oxy)-5-(naphthalen-1-yl)furan-2-carboxylate (1k)**; Synthesized by the general procedure. Yield reported over two steps.

**Yield:** 233mg, 0.46 mmol, 46% yield (clear oil)

**<sup>1</sup>H NMR** (400 MHz, CDCl<sub>3</sub>) δ 8.37 (d, *J* = 8.4 Hz, 1H), 7.84 (d, *J* = 8.4 Hz, 2H), 7.76 (d, *J* = 7.2 Hz, 1H), 7.58–7.41 (m, 3H), 6.65 (s, 1H), 5.89 (dd, *J* = 6.4, 5.2 Hz, 1H), 4.81 (d, *J* = 6.4 Hz, 2H), 4.13 (s, 2H), 3.90 (s, 3H), 1.73 (s, 3H), 1.10–0.98 (m, 21H);

**<sup>13</sup>C NMR** (101 MHz, CDCl<sub>3</sub>) δ 159.3, 155.5, 154.9, 140.6, 133.9, 130.2, 130.1, 128.7, 128.5, 127.2, 127.1, 126.2, 125.1, 125.0, 117.9, 102.5, 68.4, 67.4, 51.4, 18.0, 13.9, 12.0;

**HRMS** (ESI) calcd for [M+H]<sup>+</sup>: C<sub>30</sub>H<sub>41</sub>O<sub>5</sub>Si, *m/z*: 525.2667, observed: 525.2667.

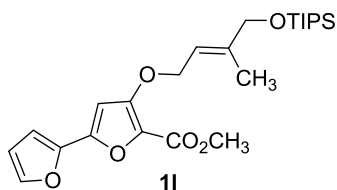

**Methyl-(*E*)-4-((3-methyl-4-((triisopropylsilyl)oxy)but-2-en-1-yl)oxy)-[2,2'-bifuran]-5-carboxylate (1l)**; Synthesized by the general procedure. Yield reported over two steps.

**Yield:** 170 mg, 0.38 mmol, 38% yield (clear oil)

**<sup>1</sup>H NMR** (400 MHz, CDCl<sub>3</sub>) δ 7.37 (s, 1H), 6.80–6.68 (m, 1H), 6.45–6.36 (m, 2H), 5.81–5.71 (m, 1H), 4.69 (d, *J* = 6.4 Hz, 2H), 4.05 (s, 2H), 3.80 (d, *J* = 1.6 Hz, 3H), 1.64 (s, 3H), 1.02–0.90 (m, 21H);

**<sup>13</sup>C NMR** (101 MHz, CDCl<sub>3</sub>) δ 159.2, 155.0, 147.8, 145.2, 143.3, 140.7, 127.6, 117.6, 111.9, 108.7, 97.9, 68.4, 67.4, 51.4, 17.9, 13.8, 12.0;

**HRMS** (ESI) calcd for [M+H]<sup>+</sup>: C<sub>24</sub>H<sub>37</sub>O<sub>6</sub>Si, *m/z*: 449.2354, observed: 449.2361.

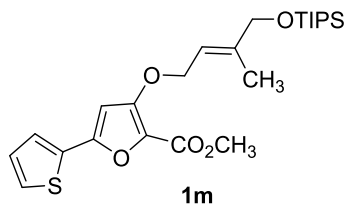

**Methyl-(E)-3-((3-methyl-4-((triisopropylsilyl)oxy)but-2-en-1-yl)oxy)-5-(thiophen-2-yl)furan-2-carboxylate (1m)**; Synthesized by the general procedure. Yield reported over two steps.

**Yield:** 181 mg, 0.39 mmol, 39% yield (clear oil)

**<sup>1</sup>H NMR** (400 MHz, CDCl<sub>3</sub>) δ 7.33 (dd, *J* = 3.6, 0.8 Hz, 1H), 7.24 (dd, *J* = 5.2, 1.2 Hz, 1H), 6.95 (dd, *J* = 5.2, 4.0 Hz, 1H), 6.35 (s, 1H), 5.78 – 5.72 (m, 1H), 4.66 (d, *J* = 6.8 Hz, 2H), 4.04 (s, 2H), 3.78 (s, 3H), 1.63 (s, 3H), 1.01 – 0.88 (m, 21H);

**<sup>13</sup>C NMR** (101 MHz, CDCl<sub>3</sub>) δ 159.1, 155.2, 151.0, 140.7, 132.2, 127.9, 127.5, 126.7, 125.4, 117.6, 98.0, 68.3, 67.4, 51.3, 17.9, 13.8, 12.0;

**HRMS** (ESI) calcd for [M+H]<sup>+</sup>: C<sub>24</sub>H<sub>37</sub>O<sub>5</sub>Si, *m/z*: 465.2125, observed: 465.2123.

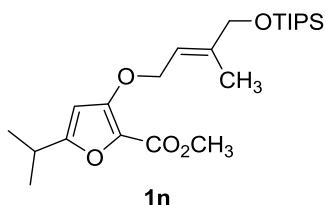

**Methyl-(E)-5-isopropyl-3-((3-methyl-4-((triisopropylsilyl)oxy)but-2-en-1-yl)oxy)furan-2-carboxylate (1n)**; Synthesized by the general procedure. Yield reported over two steps.

**Yield:** 144 mg, 0.35 mmol, 35% yield (clear oil)

**<sup>1</sup>H NMR** (400 MHz, CDCl<sub>3</sub>) δ 6.00 (s, 1H), 5.82 (t, *J* = 6.0 Hz, 1H), 4.71 (d, *J* = 6.4 Hz, 2H), 4.13 (s, 2H), 3.85 (s, 3H), 3.02 – 2.86 (m, 1H), 1.70 (s, 3H), 1.25 (d, *J* = 7.2 Hz, 6H), 1.10 - 1.01 (m, 21H);

**<sup>13</sup>C NMR** (101 MHz, CDCl<sub>3</sub>) δ 165.1, 159.4, 155.0, 140.0, 126.9, 117.8, 97.4, 68.1, 67.4, 51.2, 28.6, 20.7, 18.0, 13.8, 12.0;

**HRMS** (ESI) calcd for [M+H]<sup>+</sup>: C<sub>23</sub>H<sub>41</sub>O<sub>5</sub>Si, *m/z*: 425.2718, observed: 425.2717.

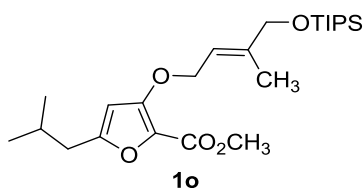

**Methyl-(E)-5-isobutyl-3-((3-methyl-4-((triisopropylsilyl)oxy)but-2-en-1-yl)oxy)furan-2-carboxylate (1o)**; Synthesized by the general procedure. Yield reported over two steps.

**Yield:** 149 mg, 0.34 mmol, 34% yield (clear oil)

**<sup>1</sup>H NMR** (400 MHz, CDCl<sub>3</sub>) δ 6.01 (s, 1H), 5.82 – 5.78 (m, 1H), 4.70 (d, *J* = 6.4 Hz, 2H), 4.13 (s, 2H), 3.85 (s, 3H), 2.47 (d, *J* = 7.2 Hz, 2H), 2.08 – 1.95 (m, 1H), 1.70 (s, 3H), 1.06 – 1.01 (m, 21H), 0.93 (d, *J* = 6.4 Hz, 6H);

**<sup>13</sup>C NMR** (101 MHz, CDCl<sub>3</sub>) δ 159.6, 155.2, 140.5, 127.5, 118.1, 100.5, 68.4, 67.7, 53.7, 38.2, 27.9, 22.55, 18.3, 14.1, 12.2;

**HRMS** (ESI) calcd for [M+H]<sup>+</sup>: C<sub>24</sub>H<sub>43</sub>O<sub>5</sub>Si, *m/z*: 439.2874, observed: 439.2869.

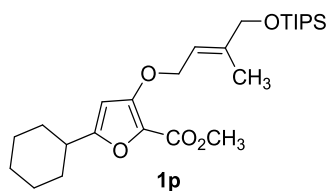

**Methyl-(E)-5-cyclohexyl-3-((3-methyl-4-((triisopropylsilyl)oxy)but-2-en-1-yl)oxy)furan-2-carboxylate (1p)**; Synthesized by the general procedure. Yield reported over two steps.

**Yield:** 148.5 mg, 0.32 mmol, 32% yield (clear oil)

**<sup>1</sup>H NMR** (400 MHz, CDCl<sub>3</sub>) δ 5.90 (s, 1H), 5.73 (t, *J* = 6.0 Hz, 1H), 4.62 (d, *J* = 6.4 Hz, 2H), 4.05 (s, 2H), 3.77 (s, 3H), 2.53 (s, 1H), 1.95 (d, *J* = 7.6 Hz, 2H), 1.80 – 1.64 (m, 4H), 1.63 (s, 3H), 1.28 (t, *J* = 10.8 Hz, 4H), 1.09 – 0.98 (m, 21H);

**<sup>13</sup>C NMR** (101 MHz, CDCl<sub>3</sub>) δ 164.3, 159.4, 155.0, 140.2, 126.8, 117.9, 97.4, 68.1, 67.4, 51.2, 37.9, 31.0, 25.8, 25.7, 18.0, 13.8, 12.0;

**HRMS** (ESI) calcd for [M+H]<sup>+</sup>: C<sub>26</sub>H<sub>45</sub>O<sub>5</sub>Si, *m/z*: 465.3031, observed: 465.3041.

### General procedure for the synthesis of (*E*)-substrates (1q- 1r)

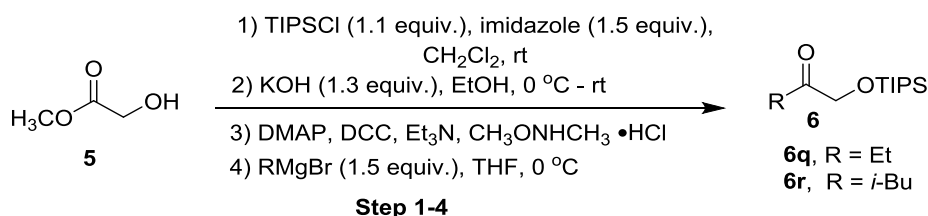

On the basis of the previous reports<sup>5-7</sup>, the alkyl-substituted ketones could be synthesized in four steps. As follow:

**Step 1:** The ethyl glycolate **5** (9 g, 100 mmol) and imidazole (6.81 g, 150 mmol, 1.5 equiv.) were dissolved in CH<sub>2</sub>Cl<sub>2</sub> (200 mL), and TIPSCl (22.2 g, 110 mmol, 1.1equiv.) was added slowly at 0 °C. Then the reaction mixture was stirred at the same temperature for 5 hours. The resulting solution was filtered through a short pad of Celite and the filtrate was concentrated in vacuum. The residue was purified by silica gel column chromatography (hexane/EtOAc, 50:1) to give the desired compound as colorless oil (22.1 g, 90 mmol, 90% yield).

**Step 2:** KOH (6.55 g, 117 mmol, 1.3 equiv.) was dissolved in EtOH (60 mL). At 0 °C, a solution of the above compound (22.1 mg, 90 mmol, 1.0 equiv.) in EtOH (400 mL) was slowly added. The mixture was stirred overnight at room temperature and concentrated under reduced pressure. The residue was dissolved in water (300 mL) and carefully neutralized with 1.0 M HCl solution to *pH* 3-4. The solution was extracted with EtOAc two times. The organic layer was washed with brine and dried over anhydrous Na<sub>2</sub>SO<sub>4</sub>, filtered and evaporated. The residue was purified by silica gel column chromatography (hexane/EtOAc, 3:1) to give the acid derivative as colorless oil (17.7 g, 76.5 mmol, 85% yiled).

**Step 3:** The acid derivative (17.7 g, 76.5 mmol, 1.0 equiv.) was dissolved in dry CH<sub>2</sub>Cl<sub>2</sub> (450 mL), *N,O*-dimethylhydroxylamine hydrochloride (8.9 g, 92 mmol, 1.2 equiv.), DMAP (280 mg, 2.3 mmol), DCC (15.8 g, 76.5 mmol, 1 equiv.), and Et<sub>3</sub>N (12.8 mL, 92 mmol, 1.2 equiv.) were sequentially added to the reaction mixture. The solution was stirred overnight at room temperature. The resulting solution was filtered through a short pad of Celite and the filtrate was concentrated in vacuum. Then 100 mL of saturated aq. NH<sub>4</sub>Cl solution was added and the solution was

extracted thrice with CH<sub>2</sub>Cl<sub>2</sub>, washed with brine, and dried over Na<sub>2</sub>SO<sub>4</sub>. Evaporation of solvent and purification by flash chromatography (hexane/ethyl acetate, 5:1) afforded Weinreb amide as a colorless oil (16.7 g, 61 mmol, 80% yield).

**Step 4:** Weinreb amide (4.12 g, 15 mmol, 1.0 equiv.) was dissolved in dry THF. At 0 °C, the alkylmagnesium bromide (22.5 mmol, 1.5 equiv., 1.0 M in THF) was slowly added. After 4 hours, saturated aq. NH<sub>4</sub>Cl solution was added, and the reaction mixture was slowly warmed to room temperature. The mixture was extracted with EtOAc. The combined organic layer was dried over Na<sub>2</sub>SO<sub>4</sub>, filtered, and evaporated. The residue was purified by flash chromatography (hexane/ethyl acetate, 20:1) to afford the compound **6** as a colorless oil (**6q**, R= Et, 3.29 g, 13.5 mmol, 90% yield; **6r**, R= *i*-Bu, 3.62 g, 13.3 mmol, 89% yield).

Then the substrates **6** were conducted in the next steps for the synthesis of the substrates **1q** and **1r**.

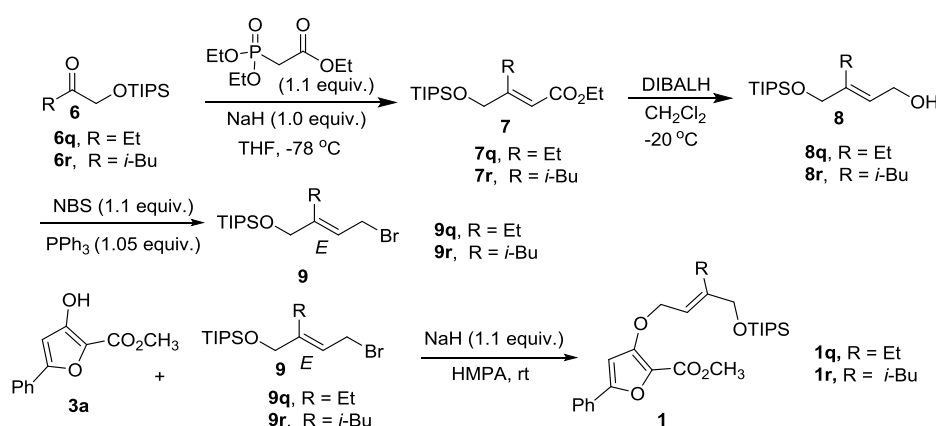

**Compound 7:** The triethylphosphonoacetate (3.2 g, 14.3 mmol, 1.1 equiv.) was conducted in dry THF. At 0 °C, NaH (312 mg, 13 mmol, 1.0 equiv.) was added and the mixture was stirred at the same temperature for 30 min. The alkyl-substituted ketone **6** (13 mmol, 1.0 equiv.) in THF was added in the mixture and the mixture was stirred at room temperature for 12 h. Saturated aq. NH<sub>4</sub>Cl solution was added. The resulting slurry was diluted with EtOAc and washed with water and brine. The organic layer was separated and dried over Na<sub>2</sub>SO<sub>4</sub>, filtered, and evaporated in vacuo to give the crude product as an *E*, *Z* mixture. The mixture was purified by flash chromatography on silica gel (0–1% EtOAc/hexane) and the *E*-product **7** could be obtained in good yield as a colorless oil (**7q**, R= Et, 1.82 g, 5.85 mmol, 45% yield; **7r**, R= *i*Bu, 1.77 g, 5.2 mmol, 40% yield).

**Compound 8:** The *E*-compound **7** (5 mmol, 1.0 equiv.) was dissolved in dry CH<sub>2</sub>Cl<sub>2</sub>. Then DIBAL-H (1.0 M hexane solution, 10.5 mmol, 2.1 equiv.) was dropped at -20 °C and the reaction continued for 2 h at the same temperature. Saturated aq. potassium tartrate solution was added and the mixture was vigorously stirred for 10 min. The solution was extracted thrice with CH<sub>2</sub>Cl<sub>2</sub>, washed with brine, and dried over Na<sub>2</sub>SO<sub>4</sub>. Evaporation of solvent and purification by flash chromatography (hexane/ethyl acetate, 10:1) afforded the compound **8** as a colorless oil (**8q**, R= Et, 1.14 g, 4.2 mmol, 94% yield; **8r**, R= *i*Bu, 1.27 g, 4.25 mmol, 95% yield).

**Compound 9:** The compound **8** (4.2 mmol, 1.0 equiv.) and triphenylphosphine (1.21 g, 4.62 mmol, 1.1 equiv.) were dissolved in CH<sub>2</sub>Cl<sub>2</sub>. *N*-bromosuccinimide (780 mg, 4.4 mmol, 1.05 equiv.) was added slowly at -20 °C, stirred for 30 min at the same temperature. The reaction mixture was evaporated. The residue was purified by flash chromatography on silica gel (hexane/EtOAc, 50:1 )



to provide the compound **9** as a colorless oil (**9q**, R= Et, 900 mg, 2.7 mmol, 65% yield; **9r**, R= *i*Bu, 900 mg, 2.5 mmol, 60% yield).

**(E)-substrate 1**: The substituted furan (**3a**) (218 mg, 1.0 mmol, 1.0 equiv.) was dissolved in dry HMPA (5 mL). At room temperature, NaH (26.4 mg, 1.1 mmol, 1.1 equiv.) was added. After 1 hour, the compound **9** (1.5 mmol, 1.5 equiv.) in 4 mL of HMPA was added in drops. The mixture was stirred at room temperature overnight. Then 10 mL of saturated aq. NH<sub>4</sub>Cl solution was added to quench the reaction. The solution was extracted three times with ethyl acetate, washed three times with brine, and dried over Na<sub>2</sub>SO<sub>4</sub>. Evaporation of solvent and purification by flash chromatography (hexane/ethyl acetate, 20:1) afforded the *E*-substrate **1** (**1q**, R= Et, 259 mg, 0.55 mmol, 55% yield; **1r**, R= *i*Bu, 280 mg, 0.56 mmol, 56% yield).

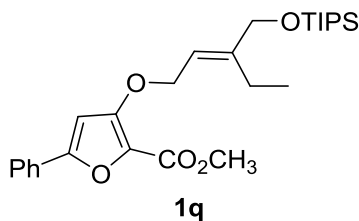

**Methyl-(E)-5-phenyl-3-((3-(((triisopropylsilyl)oxy)methyl)pent-2-en-1-yl)oxy)furan-2-carboxylate** (**1q**); Synthesized by the general procedure, the reported yield is overall yield from the compound **6**.

**Yield:** 15% yield (clear oil)

**<sup>1</sup>H NMR** (400 MHz, CDCl<sub>3</sub>) δ 7.81 – 7.67 (m, 2H), 7.45 – 7.32 (m, 3H), 6.68 – 6.54 (m, 1H), 5.83 (t, *J* = 6.4 Hz, 1H), 4.79 (d, *J* = 6.0 Hz, 2H), 4.21 (s, 2H), 4.03 – 3.80 (m, 3H), 2.31 – 2.04 (m, 2H), 1.10 – 1.01 (m, 24H);

**<sup>13</sup>C NMR** (101 MHz, CDCl<sub>3</sub>) δ 159.4, 155.5, 155.3, 146.4, 129.4, 129.2, 128.8, 128.1, 124.8, 117.4, 98.2, 68.0, 65.6, 51.4, 21.6, 18.0, 13.5, 12.0;

**HRMS** (ESI) calcd for [M+H]<sup>+</sup>: C<sub>27</sub>H<sub>41</sub>O<sub>5</sub>Si, *m/z*: 473.2718, observed: 473.2723.

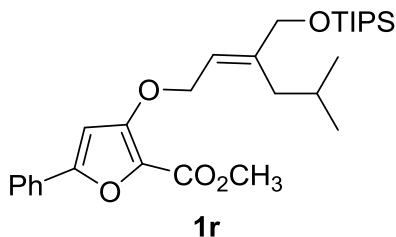

**Methyl-(E)-3-((5-methyl-3-(((triisopropylsilyl)oxy)methyl)hex-2-en-1-yl)oxy)-5-phenylfuran-2-carboxylate** (**1r**); Synthesized by the general procedure, the reported yield is overall yield from the compound **6**.

**Yield:** 13% yield (clear oil)

**<sup>1</sup>H NMR** (400 MHz, CDCl<sub>3</sub>) δ 7.80 – 7.69 (m, 2H), 7.48 – 7.31 (m, 3H), 6.68 – 6.54 (m, 1H), 5.94 (t, *J* = 6.4 Hz, 1H), 4.78 (d, *J* = 6.4 Hz, 2H), 4.17 (s, 2H), 3.89 (d, *J* = 1.2 Hz, 3H), 2.02 (d, *J* = 7.6 Hz, 2H), 1.84 – 1.73 (m, 1H), 1.11 – 1.00 (m, 21H), 0.93 (d, *J* = 6.4 Hz, 6H);

**<sup>13</sup>C NMR** (101 MHz, CDCl<sub>3</sub>) δ 159.4, 155.5, 155.3, 143.5, 129.4, 129.2, 128.8, 128.1, 124.8, 119.0, 98.2, 68.3, 66.1, 51.4, 37.8, 27.5, 22.7, 18.0, 12.0;

**HRMS** (ESI) calcd for [M+H]<sup>+</sup>: C<sub>29</sub>H<sub>45</sub>O<sub>5</sub>Si, *m/z*: 501.3031, observed: 501.3029.

## General procedure for the synthesis of (*E*)-substrate (**1s**)

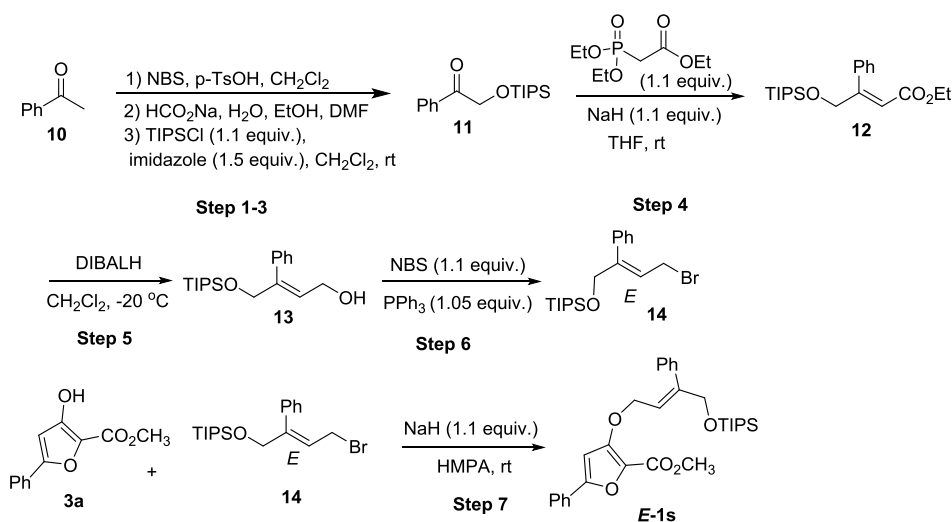

**Step 1:** The ketone **10** (6 g, 50 mmol, 1.0 equiv.) was dissolved in dry CH<sub>2</sub>Cl<sub>2</sub>. TsOH·H<sub>2</sub>O (1.9 g, 10 mmol, 0.2 equiv.) and NBS (9.79 g, 55 mmol, 1.1 equiv.) was added in sequence and the reaction mixture was stirred at room temperature overnight. H<sub>2</sub>O was added to quench the reaction. The solution was extracted three times with CH<sub>2</sub>Cl<sub>2</sub>, washed with brine, and dried over Na<sub>2</sub>SO<sub>4</sub>. Evaporation of solvent and purification by flash chromatography (hexane/ethyl acetate, 20:1) afford the bromo-product (7.96 g, 40 mmol, 80% yield).

**Step 2:** The bromo-product (7.96 g, 40 mmol, 1.0 equiv.), and HCO<sub>2</sub>Na (8.16 g, 120 mmol, 3.0 equiv.) were dissolved in DMF (40 mL), H<sub>2</sub>O (30 mL) and EtOH (110 mL). The mixture was heated to reflux. After 4-5 h, the reaction mixture was cooled to room temperature, then the solvent was removed under vacuum. The residue was diluted with water, and extracted twice with CH<sub>2</sub>Cl<sub>2</sub>. The combined organic layer was washed with brine. After drying over Na<sub>2</sub>SO<sub>4</sub>, solvent was evaporated under vacuum. The crude product was purified by flash chromatography (hexane/ethyl acetate, 5:1) to give the product (4.89 g, 36 mmol, 90% yield).

**Step 3:** The above compound (4.89g, 36 mmol, 1.0 equiv.) and imidazole (3.67 g, 54 mmol, 1.5 equiv.) were dissolved in CH<sub>2</sub>Cl<sub>2</sub>. TIPSCl (7.63 g, 39.6 mmol, 1.1 equiv.) was added slowly at 0 °C. Then the reaction mixture was stirred at the same temperature for 5 hours. The resulting solution was filtered off through a short pad of Celite and the filtrate was concentrated in vacuum. The residue was purified by silica gel column chromatography (hexane/EtOAc, 50:1) to give the compound **11** as colorless oil (9.46 g, 32.4 mmol, 90% yield).

**Step 4:** The triethylphosphonoacetate (4.93 g, 22 mmol, 1.1 equiv.) was dissolved in dry THF. At 0 °C, NaH (528 mg, 22 mmol, 1.1 equiv.) was added and the mixture was stirred at the same temperature for 30 min. The compound **11** (5.84 g, 20 mmol, 1.0 equiv.) in THF was added in the mixture and the mixture was stirred at room temperature for 12 h. Saturated aq. NH<sub>4</sub>Cl solution was added. The resulting slurry was diluted with EtOAc and washed with water and brine. The organic layer was separated and dried over Na<sub>2</sub>SO<sub>4</sub>, filtered, and evaporated in vacuo to give the crude product as an *E*, *Z* mixture. The residue mixture was purified by flash chromatography on silica gel (0–1% EtOAc/hexane) to provide *E*-compound **12** as colorless oil (3.26 g, 9 mmol, 45% yield).

**Step 5:** The *E*-compound **12** (3.26 g, 9 mmol, 1.0 equiv.) was dissolved in dry CH<sub>2</sub>Cl<sub>2</sub>. DIBAL-H (1.0 M hexane solution, 18.9 mmol, 18.9 ml, 2.1 equiv.) was dropped at -20 °C and the

reaction was continued for 2 h at the same temperature. Saturated aq. potassium tartrate solution was added and the mixture was vigorously stirred for 10 min. The solution was extracted three times with CH<sub>2</sub>Cl<sub>2</sub>, washed with brine, and dried over Na<sub>2</sub>SO<sub>4</sub>. Evaporation of solvent and purification by flash chromatography (hexane/ethyl acetate, 10:1) afforded the compound **13** as colorless oil (2.43 g, 7.6 mmol, 95% yield).

**Step 6:** The compound **13** (5 mmol, 1.0 equiv.) and triphenylphosphine (1.44g, 5.5 mmol, 1.1 equiv.) were dissolved in dry CH<sub>2</sub>Cl<sub>2</sub>, then *N*-bromosuccinimide (943 mg, 5.3 mmol, 1.05 equiv.) was added slowly at -20 °C, stirred for 30 min at room temperature. The reaction mixture was evaporated. The residue was purified by flash chromatography on silica gel (EtOAc/hexane, 50:1) to provide the compound **14** as colorless oil (1.34 g, 3.5 mmol, 65% yield).

**Step 7:** The substituted furan **3a** (218 mg, 1.0 mmol, 1.0 equiv.) was dissolved in dry HMPA (5 mL). At room temperature, NaH (26.4 mg, 1.1 mmol, 1.1 equiv.) was added. After 1 hour, the compound **14** (574 mg, 1.5 mmol, 1.5 equiv.) in 4 mL of HMPA was added in drops. The mixture was stirred at room temperature overnight. Then 10 mL of saturated aq. NH<sub>4</sub>Cl solution was added to quench the reaction. The solution was extracted three times with ethyl acetate, washed three times with brine, and dried over Na<sub>2</sub>SO<sub>4</sub>. Evaporation of solvent and purification by flash chromatography (hexane/ethyl acetate, 20:1) afforded the product **E-1s** (260 mg, 0.5 mmol, 50% yield).

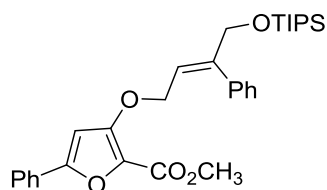

**E-1s**

**Methyl-(*E*)-5-phenyl-3-((3-phenyl-4-((triisopropylsilyl)oxy)but-2-en-1-yl)oxy)furan-2-carboxylate (*E*-1s);** Synthesized by the general procedure, the reported yield is overall yield from the compound **10**.

**Yield:** 9% yield (clear oil)

**<sup>1</sup>H NMR** (400 MHz, CDCl<sub>3</sub>) δ 7.67 – 7.63 (m, 2H), 7.44 – 7.30 (m, 6H), 7.24 – 7.19 (m, 2H), 6.27 (s, 1H), 6.20 – 6.16 (m, 1H), 4.70 (d, *J* = 6.8 Hz, 2H), 4.45 (d, *J* = 1.2 Hz, 2H), 3.89 (s, 3H), 1.12 – 0.98 (m, 21H);

**<sup>13</sup>C NMR** (101 MHz, CDCl<sub>3</sub>) δ 159.3, 155.2, 155.1, 145.9, 137.3, 129.4, 129.2, 128.7, 128.5, 128.4, 128.1, 124.7, 119.8, 98.4, 68.7, 66.4, 51.3, 18.0, 12.0;

**HRMS** (ESI) calcd for [M+H]<sup>+</sup>: C<sub>31</sub>H<sub>41</sub>O<sub>5</sub>Si, m/z: 521.2717, observed: 521.2717.

## General procedure for the synthesis of (Z)-substrates (1b' and 1n')

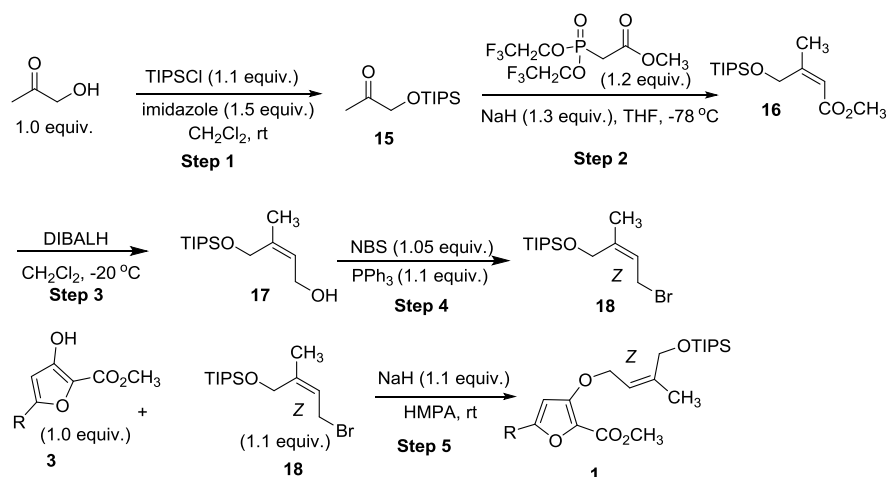

**Step 1:** The hydroxy acetone (1.48 g, 20 mmol, 1.0 equiv.) and imidazole (2.04 g, 30 mmol, 1.5 equiv.) were dissolved in CH<sub>2</sub>Cl<sub>2</sub>. TIPSCl (3.85 g, 20 mmol, 1.0 equiv.) was added slowly at 0 °C, then the reaction mixture was stirred for 5 hours at room temperature. The resulting solution was filtered through a short pad of Celite and the filtrate was concentrated in vacuum. The residue was purified by silica gel column chromatography (hexane/EtOAc, 50:1) to give the compound **15** as colorless oil (4.37 g, 19 mmol, 95% yield).

**Step 2:** The (2, 2, 2-trifluoroethyl) methoxycarbonylmethyl-phosphonate (7.25 g, 22.8 mmol, 1.2 equiv.) was dissolved in dry THF. At 0 °C, NaH (456 mg, 19 mmol, 1.0 equiv.) was added and the mixture was stirred at the same temperature for 30 min. Then, the reaction mixture was cooled to -78 °C, the compound **15** (4.37 g, 19 mmol, 1.0 equiv.) in THF was added in the mixture. Next, the mixture was stirred at -78 °C for 12 h. Saturated aq. NH<sub>4</sub>Cl solution was added. The resulting slurry was diluted with EtOAc and washed with water and brine. The organic layer was separated and dried over Na<sub>2</sub>SO<sub>4</sub>, filtered, and evaporated in vacuo to give the crude product as an *E, Z* mixture. The residue mixture was purified by flash chromatography on silica gel (0–1% EtOAc/hexane) to provide *Z*-compound **16** as colorless oil (3.26 g, 11.4 mmol, 60% yield).

**Step 3:** The *Z*-compound **16** (3.26 g, 11.4 mmol, 1.0 equiv.) was dissolved in dry CH<sub>2</sub>Cl<sub>2</sub>, DIBAL-H was dropped (1.0M hexane solution, 23.9 mmol, 24 mL, 2.1 equiv.) at -20 °C and the reaction continued stirring for 2 h at the same temperature. Saturated aq. potassium tartrate solution was added and the mixture was vigorously stirred for 10 min. The solution was extracted thrice with CH<sub>2</sub>Cl<sub>2</sub>, washed with brine, and dried over Na<sub>2</sub>SO<sub>4</sub>. Evaporation of solvent and purification by flash chromatography (hexane/ethyl acetate, 10:1) afforded the compound **17** as colorless oil (2.79 g, 10.8 mmol, 95% yield).

**Step 4:** The compound **17** (2.79 g, 10.8 mmol, 1.0 equiv.) and triphenylphosphine (3.11 g, 11.88 mmol, 1.1 equiv.) were dissolved in CH<sub>2</sub>Cl<sub>2</sub>. *N*-bromosuccinimide (2.0 g, 11.34 mmol, 1.05 equiv.) was added slowly at -20 °C, stirred for 30 min at the same temperature. The solution was extracted with CH<sub>2</sub>Cl<sub>2</sub>, washed with brine, and dried over Na<sub>2</sub>SO<sub>4</sub>. The solvent was evaporated. The residue was purified by flash chromatography on silica gel (EtOAc/hexane, 50:1) to provide the compound **18** as colorless oil (7 mmol, 65% yield).

**Step 5:** The substituted furan (**3**) (1.0 mmol, 1.0 equiv.) was dissolved in dry HMPA (5 mL). At room temperature, NaH (26.4 mg, 1.1 mmol, 1.1 equiv.) was added. After 1 hour, the compound **18** (1.5 mmol, 1.5 equiv.) in 4 mL of HMPA was added in drops. The mixture was stirred at room

temperature overnight. Then 10 mL of saturated aq.  $\text{NH}_4\text{Cl}$  solution was added to quench the reaction. The solution was extracted three times with ethyl acetate, washed three times with brine, and dried over  $\text{Na}_2\text{SO}_4$ . Evaporation of solvent and purification by flash chromatography (hexane/ethyl acetate, 20:1) afforded *Z*-substrate (**1b'**) 256 mg, 0.56 mmol, 56% yield; **1n'** (241 mg, 0.57 mmol, 57% yield).

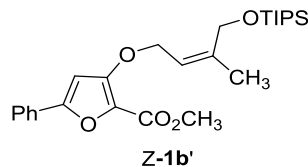

**Methyl-(*Z*)-3-((3-methyl-4-((triisopropylsilyl)oxy)but-2-en-1-yl)oxy)-5-phenylfuran-2-carboxylate (**Z-1b'**):** Synthesized by the general procedure, the reported yield is overall yield from hydroxy acetone.

**Yield:** 20% yield (clear oil)

**<sup>1</sup>H NMR** (400 MHz,  $\text{CDCl}_3$ )  $\delta$  7.75 (d,  $J = 7.8$  Hz, 2H), 7.47 – 7.32 (m, 3H), 6.62 (s, 1H), 5.55 (s, 1H), 4.83 (d,  $J = 5.6$  Hz, 2H), 4.33 (s, 2H), 3.90 (d,  $J = 1.2$  Hz, 3H), 1.83 (s, 3H), 1.18 – 1.01 (m, 21H);

**<sup>13</sup>C NMR** (101 MHz,  $\text{CDCl}_3$ )  $\delta$  159.3, 155.5, 155.4, 140.7, 129.4, 129.3, 128.8, 124.8, 120.7, 98.0, 68.2, 63.1, 51.4, 21.2, 18.0, 12.0;

**HRMS** (ESI) calcd for  $[\text{M}+\text{H}]^+$ :  $\text{C}_{26}\text{H}_{39}\text{O}_5\text{Si}$ ,  $m/z$ : 459.2567, observed: 459.2566.

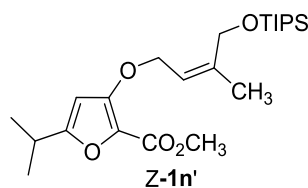

**Methyl-(*Z*)-5-isopropyl-3-((3-methyl-4-((triisopropylsilyl)oxy)but-2-en-1-yl)oxy)furan-2-carboxylate (**Z-1n'**):** Synthesized by the general procedure, the reported yield is overall yield from hydroxy acetone.

**Yield:** 21% yield (clear oil)

**<sup>1</sup>H NMR** (400 MHz,  $\text{CDCl}_3$ )  $\delta$  6.00 (s, 1H), 5.53 – 5.49 (m, 1H), 4.74 (d,  $J = 6.4$  Hz, 2H), 4.29 (s, 2H), 3.86 (s, 3H), 2.96 – 2.89 (m, 1H), 1.81 (s, 3H), 1.26 (d,  $J = 6.98$  Hz, 6H), 1.09 – 1.05 (m, 21H);

**<sup>13</sup>C NMR** (101 MHz,  $\text{CDCl}_3$ )  $\delta$  165.2, 159.4, 155.0, 140.4, 126.8, 120.8, 97.3, 68.0, 63.1, 51.2, 28.6, 21.1, 20.7, 18.0, 11.9;

**HRMS** (ESI) calcd for  $[\text{M}+\text{H}]^+$ :  $\text{C}_{23}\text{H}_{41}\text{O}_5\text{Si}$ ,  $m/z$ : 425.2718, observed: 425.2717.

## General procedure for the synthesis of (Z)-substrates (1s'-1x')

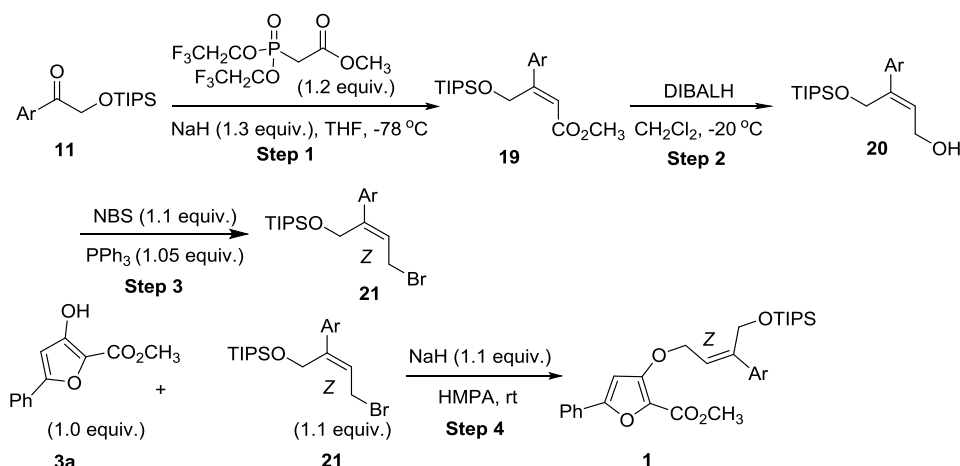

**Step 1:** The (2, 2, 2-trifluoroethyl)-methoxycarbonylmethyl-phosphonate (3.8 g, 12 mmol, 1.2 equiv.) was dissolved in dry THF. At 0 °C, NaH (312 mg, 13 mmol, 1.3 equiv.) was added and the mixture was stirred at the same temperature for 30 min. Then, the reaction mixture was cooled to -78 °C, the compound **11** (10 mmol, 1.0 equiv.) in THF was added in the mixture and stirred at -78 °C for 12 h, then stirred at room temperature for 5h. Saturated aq. NH<sub>4</sub>Cl solution was added. The resulting slurry was diluted with EtOAc and washed with water and brine. The organic layer was separated and dried over Na<sub>2</sub>SO<sub>4</sub>, filtered, and evaporated in vacuo to give the crude product as an *E, Z* mixture. The residue mixture was purified by flash chromatography on silica gel (0–1% EtOAc/hexane) to provide *Z*-compound **19** as colorless oil.

**Step 2:** The *Z*-compound **19** (5 mmol, 1.0 equiv.) was dissolved in dry CH<sub>2</sub>Cl<sub>2</sub> was dropped DIBAL-H (1.0 M hexane solution, 10.5 mmol, 10.5 mL, 2.1 equiv.) at -20 °C and the reaction was continued for 2 h at the same temperature. Saturated aq. potassium tartrate solution was added and the mixture was vigorously stirred for 10 min. The solution was extracted thrice with CH<sub>2</sub>Cl<sub>2</sub>, washed with brine, and dried over Na<sub>2</sub>SO<sub>4</sub>. Evaporation of solvent and purification by flash chromatography (hexane/ethyl acetate, 10:1) afforded the compound **20** as colorless oil.

**Step 3:** The compound **20** (4 mmol, 1.0 equiv.) and triphenylphosphine (1.15 g, 4.4 mmol, 1.1 equiv.) were dissolved in CH<sub>2</sub>Cl<sub>2</sub>, and *N*-bromosuccinimide (747 mg, 4.2 mmol, 1.05 equiv.) was added slowly at -20 °C, stirred for 30 min at -20 °C. The solution was extracted thrice with CH<sub>2</sub>Cl<sub>2</sub>, washed with brine, and dried over Na<sub>2</sub>SO<sub>4</sub>. The reaction solvent was evaporated. The residue was purified by flash chromatography on silica gel (EtOAc/hexane, 50:1) to provide the compound **21** as a colorless oil.

**Step 5:** The substituted furan (**3a**) (218 mg, 1.0 mmol, 1.0 equiv.) was dissolved in dry HMPA (5 mL). At room temperature, NaH (26.4 mg, 1.1 mmol, 1.1 equiv.) was added. After 1 hour, the compound **21** (1.5 mmol, 1.0 equiv.) in 4 mL of HMPA was added in drops. The mixture was stirred at room temperature overnight. Then 10 mL of saturated aq. NH<sub>4</sub>Cl solution was added to quench the reaction. The solution was extracted three times with ethyl acetate, washed three times with brine, and dried over Na<sub>2</sub>SO<sub>4</sub>. Evaporation of solvent and purification by flash chromatography (hexane/ethyl acetate, 20:1) afforded *Z*-product **1s'-1x'**.

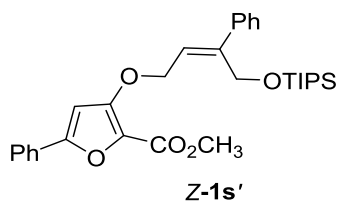

**Methyl-(Z)-5-phenyl-3-((3-phenyl-4-((triisopropylsilyl)oxy)but-2-en-1-yl)oxy)furan-2-carboxylate (Z-1s')**: Synthesized by the general procedure, the reported yield is overall yield from the compound **11**.

**Yield:** 15% yield (clear oil)

**<sup>1</sup>H NMR** (400 MHz, CDCl<sub>3</sub>) δ 7.74 (d, *J* = 7.2 Hz, 2H), 7.44 – 7.23 (m, 8H), 6.68 (s, 1H), 6.02 (t, *J* = 5.6 Hz, 1H), 5.13 (d, *J* = 6.0 Hz, 2H), 4.73 (s, 2H), 3.91 (s, 3H), 1.16 – 0.99 (m, 21H);

**<sup>13</sup>C NMR** (101 MHz, CDCl<sub>3</sub>) δ 159.3, 155.6, 155.4, 142.5, 140.6, 129.4, 128.8, 128.3, 128.0, 127.6, 126.7, 125.5, 124.9, 98.0, 69.2, 62.8, 51.5, 18.1, 12.0;

**HRMS** (ESI) calcd for [M+H]<sup>+</sup>: C<sub>31</sub>H<sub>41</sub>O<sub>5</sub>Si, *m/z*: 521.2718, observed: 521.2718.

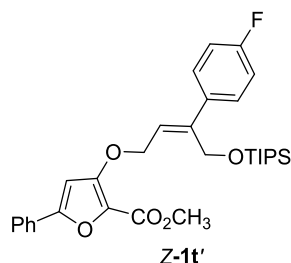

**Methyl-(Z)-3-((3-(4-fluorophenyl)-4-((triisopropylsilyl)oxy)but-2-en-1-yl)oxy)-5-phenylfuran-2-carboxylate (Z-1t')**: Synthesized by the general procedure, the reported yield is overall yield from the compound **11**.

**Yield:** 14% yield (clear oil)

**<sup>1</sup>H NMR** (400 MHz, CDCl<sub>3</sub>) δ 7.77 – 7.72 (m, 2H), 7.42 – 7.29 (m, 5H), 7.10 – 6.94 (m, 2H), 6.68 (d, *J* = 2.0 Hz, 1H), 5.98 (t, *J* = 5.6 Hz, 1H), 5.09 (d, *J* = 5.6 Hz, 2H), 4.70 (s, 2H), 3.91 (d, *J* = 2.0 Hz, 3H), 1.15 – 1.01 (m, 21H);

**<sup>13</sup>C NMR** (101 MHz, CDCl<sub>3</sub>) δ 162.5 (d, 246 Hz), 159.3, 155.3, 154.9, 145.1, 133.1 (d, *J* = 4 Hz), 130.1 (d, *J* = 8 Hz), 129.3, 129.2, 128.8, 128.1, 124.7, 120.4, 115.4 (d, *J* = 21Hz), 115.0, 98.2, 68.5, 66.6, 51.3, 17.9, 11.9;

**HRMS** (ESI) calcd for [M+H]<sup>+</sup>: C<sub>31</sub>H<sub>40</sub>O<sub>5</sub>SiF, *m/z*: 539.2629, 540.2663, observed: 539.2625, 540.2651.

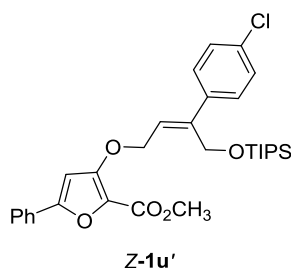

**Methyl-(Z)-3-((3-(4-chlorophenyl)-4-((triisopropylsilyl)oxy)but-2-en-1-yl)oxy)-5-phenylfuran-2-carboxylate (Z-1u')**: Synthesized by the general procedure, the reported yield is overall yield from the compound **11**.

**Yield:** 16% yield (clear oil)

**<sup>1</sup>H NMR** (400 MHz, CDCl<sub>3</sub>) δ 7.74 (d, *J* = 7.2 Hz, 2H), 7.40 (t, *J* = 8.0 Hz, 2H), 7.37 – 7.31 (m, 3H), 7.31 – 7.25 (m, 2H), 6.67 (s, 1H), 6.02 (t, *J* = 5.6 Hz, 1H), 5.08 (d, *J* = 6.0 Hz, 2H), 4.69 (s, 2H), 3.91 (s, 3H), 1.16 – 1.03 (m, 21H);

**<sup>13</sup>C NMR** (101 MHz, CDCl<sub>3</sub>) δ 159.3, 155.6, 155.2, 141.6, 138.9, 133.4, 129.3, 128.81 (s, 5H), 128.4, 128.0, 125.7, 124.8, 97.9, 68.9, 62.2, 51.4, 18.0, 12.0;

**HRMS** (ESI) calcd for [M+H]<sup>+</sup>: C<sub>31</sub>H<sub>40</sub>O<sub>5</sub>SiCl, *m/z*: 555.2334, 556.2367, observed: 555.2338, 556.2367.

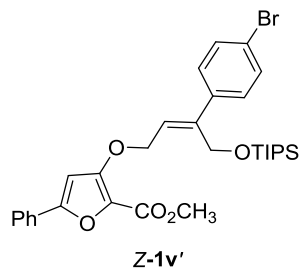

**Methyl-(Z)-3-((3-(4-bromophenyl)-4-((triisopropylsilyl)oxy)but-2-en-1-yl)oxy)-5-phenylfuran-2-carboxylate (Z-1v<sup>1</sup>)**; Synthesized by the general procedure, the reported yield is overall yield from compound **11**.

**Yield:** 16% yield (clear oil)

**<sup>1</sup>H NMR** (400 MHz, CDCl<sub>3</sub>) δ 7.74 (d, *J* = 8.0 Hz, 2H), 7.47 – 7.31 (m, 5H), 7.31 – 7.21 (m, 2H), 6.66 (d, *J* = 1.2 Hz, 1H), 6.02 (t, *J* = 5.2 Hz, 1H), 5.08 (d, *J* = 5.6 Hz, 2H), 4.69 (s, 2H), 3.91 (d, *J* = 1.2 Hz, 3H), 1.15 – 1.02 (m, 21H);

**<sup>13</sup>C NMR** (101 MHz, CDCl<sub>3</sub>) δ 159.3, 155.6, 155.2, 141.6, 139.4, 131.4, 129.4, 129.3, 128.8, 128.4, 128.0, 125.8, 124.8, 121.6, 97.9, 68.9, 62.1, 51.5, 51.4, 18.0, 12.0;

**HRMS** (ESI) calcd for [M+H]<sup>+</sup>: C<sub>31</sub>H<sub>40</sub>O<sub>5</sub>SiBr, *m/z*: 599.1828, 601.1808, observed: 599.1817, 601.1799.

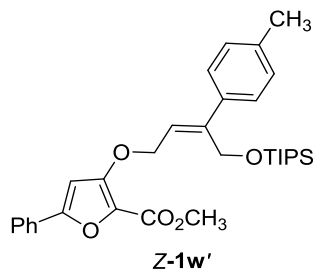

**Methyl-(Z)-5-phenyl-3-((3-(p-tolyl)-4-((triisopropylsilyl)oxy)but-2-en-1-yl)oxy)furan-2-carboxylate (Z:E=5:1)**; Synthesized by the general procedure, the reported yield is overall yield from the compound **11**.

**Yield:** 12% yield (clear oil)

**<sup>1</sup>H NMR** (400 MHz, CDCl<sub>3</sub>) δ 7.74 – 7.26 (m, 2H), 7.40 – 7.28 (m, 5H), 7.11 (d, *J* = 8.0 Hz, 2H), 6.69 (s, 1H), 6.01 (t, *J* = 6.0 Hz, 1H), 5.13 (d, *J* = 6.0 Hz, 2H), 4.71 (s, 2H), 3.90 (s, 3H), 2.31 (s, 3H), 1.10 – 1.01 (m, 21H);

**<sup>13</sup>C NMR** (101 MHz, CDCl<sub>3</sub>) δ 159.3, 155.6, 155.4, 142.2, 137.7, 137.4, 129.4, 129.3, 129.2, 129.0, 128.8, 128.7, 128.3, 128.0, 126.5, 124.8, 98.0, 69.3, 62.8, 51.4, 21.1, 18.1, 12.0;

**HRMS** (ESI) calcd for [M+H]<sup>+</sup>: C<sub>32</sub>H<sub>43</sub>O<sub>5</sub>Si, *m/z*: 535.2874, observed: 535.2874.



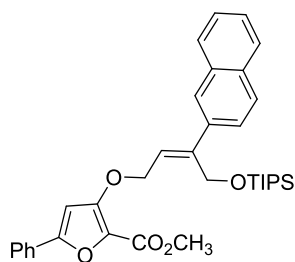

**Z-1x'**

**Methyl-(Z)-3-((3-(naphthalen-2-yl)-4-((triisopropylsilyl)oxy)but-2-en-1-yl)oxy)-5-phenylfuran-2-carboxylate (Z-1x')**; Synthesized by the general procedure, the reported yield is overall yield from the compound **11**.

**Yield:** 15% yield (clear oil)

**<sup>1</sup>H NMR** (400 MHz, CDCl<sub>3</sub>) δ 7.88 (s, 1H), 7.84 – 7.70 (m, 5H), 7.55 (t, *J* = 8.8 Hz, 1H), 7.50 – 7.30 (m, 5H), 6.70 (d, *J* = 2.0 Hz, 1H), 6.19 (t, *J* = 5.6 Hz, 1H), 5.17 (d, *J* = 5.6 Hz, 2H), 4.83 (s, 2H), 3.92 (d, *J* = 1.6 Hz, 3H), 1.22 – 1.06 (m, 21H);

**<sup>13</sup>C NMR** (101 MHz, CDCl<sub>3</sub>) δ 159.4, 155.6, 155.4, 142.2, 137.9, 133.3, 132.8, 129.4, 129.3, 128.8, 128.2, 128.0, 127.9, 127.6, 126.2, 126.1, 126.0, 125.5, 124.9, 98.0, 69.3, 62.6, 51.5, 26.9, 18.1, 12.0;

**HRMS** (ESI) calcd for [M+H]<sup>+</sup>: C<sub>35</sub>H<sub>43</sub>O<sub>5</sub>Si, *m/z*: 571.2880, observed: 571.2887.

### General procedure for the synthesis of the substrate **1y**

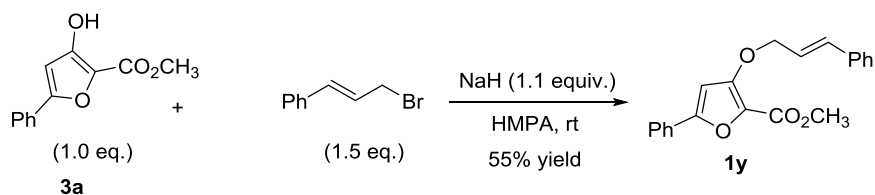

The substituted furan (**3a**) (218 mg, 1.0 mmol, 1.0 equiv.) was dissolved in dry HMPA (5 mL). At room temperature, NaH (26.4 mg, 1.1 mmol, 1.1 equiv.) was added. After 1 hour, cinnamyl bromide (296 mg, 1.5 mmol, 1.5 equiv.) in 4 mL of HMPA was added in drops. The mixture was stirred at room temperature overnight. Then 10 mL of saturated aq. NH<sub>4</sub>Cl solution was added to quench the reaction. The solution was extracted three times with ethyl acetate, washed three times with brine, and dried over Na<sub>2</sub>SO<sub>4</sub>. Evaporation of solvent and purification by flash chromatography (hexane/ethyl acetate, 20:1) afforded the substrate **1y**.

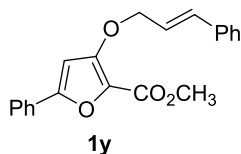

**Methyl 3-(cinnamyloxy)-5-phenylfuran-2-carboxylate (1y)**;

**Yield:** 184 mg, 0.55 mmol, 55% yield (white solid)

**<sup>1</sup>H NMR** (400 MHz, CDCl<sub>3</sub>) δ 7.74 (d, *J* = 6.4 Hz, 2H), 7.46 – 7.21 (m, 8H), 6.75 (d, *J* = 16.0 Hz, 1H), 6.64 (s, 1H), 6.42 – 6.38 (m, 1H), 4.84 (s, 2H), 3.91 (s, 3H);

**<sup>13</sup>C NMR** (101 MHz, CDCl<sub>3</sub>) δ 159.3, 155.6, 155.3, 136.1, 133.9, 129.4, 129.3, 128.8, 128.7, 128.2, 128.0, 126.7, 124.9, 123.5, 98.0, 72.4, 51.5;

**HRMS** (ESI) calcd for [M+H]<sup>+</sup>: C<sub>21</sub>H<sub>19</sub>O<sub>4</sub>, *m/z*: 355.1277, observed: 355.1277.

## General procedure for the synthesis of substrate *E*-1z and *Z*-1z'

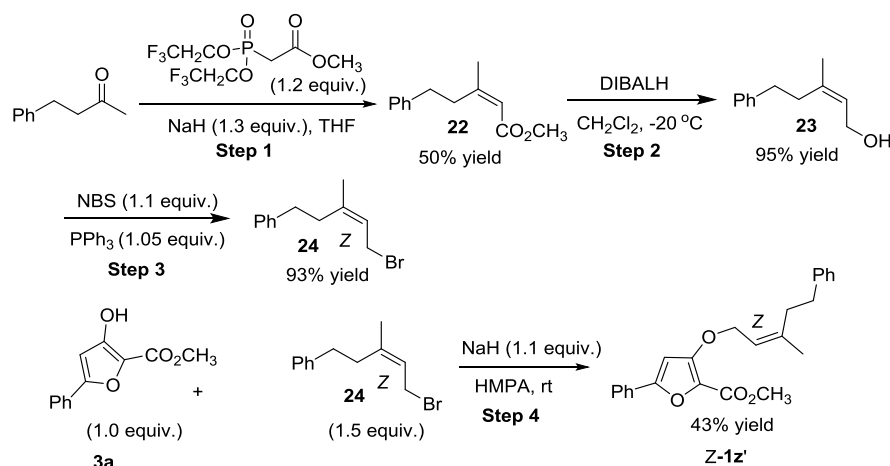

**Step 1:** The (2, 2, 2-trifluoroethyl)methoxycarbonylmethyl-phosphonate (5.72 g, 18 mmol, 1.2 equiv.) was dissolved in dry THF. At 0 °C, the NaH (456 mg, 19.5 mmol, 1.3 equiv.) was added and the mixture was stirred at the same temperature for 30 min. Then, the reaction mixture was cooled to -78 °C, the ketone (2.22 g, 15 mmol, 1.0 equiv.) in THF was added in the mixture at and the mixture was stirred at -78 °C for 12 h, then stirred at room temperature for 5h. Saturated aq. NH<sub>4</sub>Cl solution was added. The resulting slurry was diluted with EtOAc and washed with water and brine. The organic layer was separated and dried over Na<sub>2</sub>SO<sub>4</sub>, filtered, and evaporated in vacuo to give the crude product as an *E*, *Z* mixture. The residue mixture was purified by flash chromatography on silica gel (0–1% EtOAc/hexane) to provide *Z*-compound **22** as colorless oil (1.53 g, 7.5 mmol, 50% yield).

**Step 2:** The *Z*-compound **22** (1.53 g, 7.5 mmol, 1.0 equiv.) was dissolved in dry CH<sub>2</sub>Cl<sub>2</sub>. DIBAL-H (1.0 M hexane solution, 15.8 mmol, 15.8 mL, 2.1 equiv.) was dropped at -20 °C and the reaction was continued for 2 h at the same temperature. Saturated aq. potassium tartrate solution was added and the mixture was vigorously stirred for 10 min. The solution was extracted three times with CH<sub>2</sub>Cl<sub>2</sub>, washed with brine, and dried over Na<sub>2</sub>SO<sub>4</sub>. Evaporation of solvent and purification by flash chromatography (hexane/ethyl acetate, 10:1) afforded the compound **23** as colorless oil (1.23 g, 7 mmol, 94% yield).

**Step 3:** The compound **23** (1.23 g, 7 mmol, 1.0 equiv.) and triphenylphosphine (2.0 g, 7.7 mmol, 1.1 equiv.) were dissolved in CH<sub>2</sub>Cl<sub>2</sub>. *N*-bromosuccinimide (1.42 g, 8 mmol, 1.05 equiv.) was added slowly at -20 °C, stirred for 30 min at -20 °C. The solution was extracted three times with CH<sub>2</sub>Cl<sub>2</sub>, washed with brine, and dried over Na<sub>2</sub>SO<sub>4</sub>. The reaction solvent was evaporated. The residue was purified by flash chromatography on silica gel (EtOAc/hexane, 50:1) to provide the compound **24** as colorless oil (1.32 g, 5.5 mmol, 79% yield).

**Step 5:** The substituted furan (**3a**) (218 mg, 1.0 mmol, 1.0 equiv.) was dissolved in dry HMPA (5 mL). At room temperature, NaH (26.4 mg, 1.1 mmol, 1.1 equiv.) was added. After 1 hour, the compound **24** (358 mg, 1.5 mmol, 1.5 equiv.) in 4 mL of HMPA was added in drops. The mixture was stirred at room temperature overnight. Then 10 mL of saturated aq. NH<sub>4</sub>Cl solution was added to quench the reaction. The solution was extracted three times with ethyl acetate, washed three times with brine, and dried over Na<sub>2</sub>SO<sub>4</sub>. Evaporation of solvent and purification by flash chromatography (hexane/ethyl acetate, 20:1) afforded the substrate **Z**-1z' (161 mg, 0.43 mmol, 43% yield).

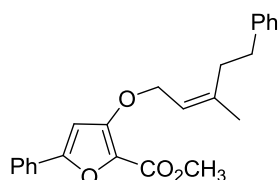

**Z-1z'**

**Methyl (Z)-3-((3-methyl-5-phenylpent-2-en-1-yl)oxy)-5-phenylfuran-2-carboxylate (Z-1z<sup>1</sup>);**

Synthesized by the general procedure, the reported yield is overall yield from ketone.

**Yield:** 16% yield (clear oil);

**<sup>1</sup>H NMR** (400 MHz, CDCl<sub>3</sub>) δ 7.74 (d, *J* = 6.8 Hz, 2H), 7.43 – 7.33 (m, 3H), 7.31 – 7.27 (m, 2H), 7.22 – 7.17 (m, 3H), 6.44 (d, *J* = 1.6 Hz, 1H), 5.52 (s, 1H), 4.34 (d, *J* = 5.6 Hz, 2H), 3.87 (d, *J* = 1.6 Hz, 3H), 2.75 (t, *J* = 7.2 Hz, 2H), 2.43 (t, *J* = 7.2 Hz, 2H), 1.83 (s, 3H);

**<sup>13</sup>C NMR** (101 MHz, CDCl<sub>3</sub>) δ 159.3, 155.4, 141.6, 141.2, 129.4, 129.3, 128.8, 128.6, 128.4, 126.1, 124.9, 120.6, 97.9, 68.1, 51.4, 34.7, 34.3, 23.6;

**HRMS** (ESI) calcd for [M+H]<sup>+</sup>: C<sub>24</sub>H<sub>25</sub>O<sub>4</sub>, *m/z*: 377.1747, observed: 377.1748.

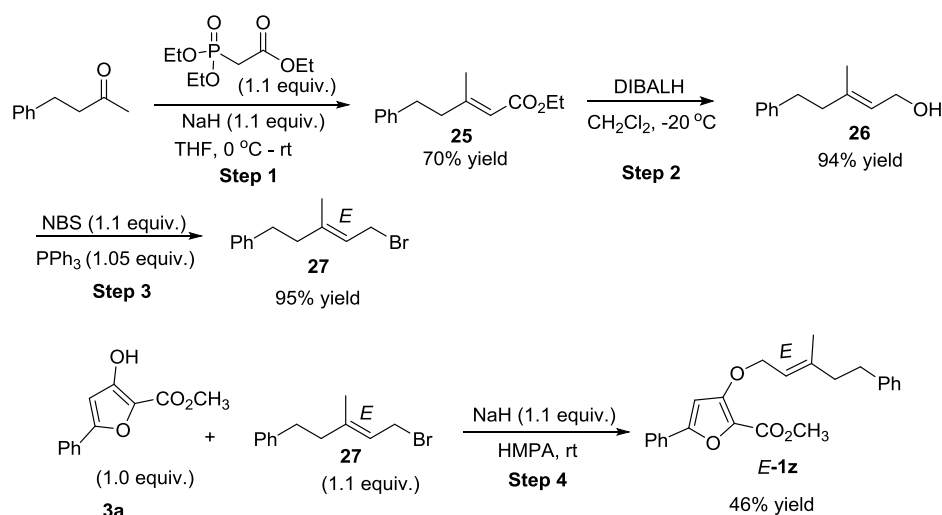

**Step 1:** The triethylphosphonoacetate (3.69 g, 16.5 mmol, 1.1 equiv.) was dissolved in dry THF. At 0 °C, the NaH (396 mg, 16.5 mmol, 1.1 equiv.) was added and the mixture was stirred at the same temperature for 30 min. The ketone (2.22 g, 15 mmol, 1.0 equiv.) in THF was added in the mixture and the mixture was stirred at the room temperature for 12 h. Saturated aq NH<sub>4</sub>Cl solution was added. The resulting slurry was diluted with EtOAc and washed with water and brine. The organic layer was separated and dried over Na<sub>2</sub>SO<sub>4</sub> filtered, and evaporated in vacuo to give the crude product as an *E*, *Z* mixture. The residue mixture was purified by flash chromatography on silica gel (0–1% EtOAc/hexane) to provide *E*-compound **25** as a colorless oil (2.29g, 10.5 mmol, 70% yield).

**Step 2:** The *E*-compound **25** (2.29 g, 10.5 mmol, 1.0 equiv.) was dissolved in dry CH<sub>2</sub>Cl<sub>2</sub>. DIBAL-H (1.0 M hexane solution, 22 mmol, 22 mL, 2.1 equiv.) was dropped at -20 °C and the reaction was continued for 2 h at the same temperature. Saturated aq. potassium tartrate solution was added and the mixture was vigorously stirred for 10 min. The solution was extracted three times with CH<sub>2</sub>Cl<sub>2</sub>, washed with brine, and dried over Na<sub>2</sub>SO<sub>4</sub>. Evaporation of solvent and purification by flash chromatography (hexane/ethyl acetate, 10:1) afforded the compound **26** as colorless oil (1.74 g, 9.9 mmol, 94% yield).

**Step 3:** The compound **26** (880 mg, 5 mmol, 1.0 equiv.) and triphenylphosphine (1.44g, 5.5 mmol, 1.1 equiv.) were dissolved in CH<sub>2</sub>Cl<sub>2</sub>. *N*-bromosuccinimide (925 mg, 5.2 mmol, 1.05 equiv.) was added slowly at -20 °C, stirred for 30 min at room temperature. The solution was extracted three times with CH<sub>2</sub>Cl<sub>2</sub>, washed with brine, and dried over Na<sub>2</sub>SO<sub>4</sub>. The reaction solvent was evaporated. The residue was purified by flash chromatography on silica gel (EtOAc/hexane, 50:1) to provide the compound **27** as colorless oil (1.12 g, 4.7 mmol, 80% yield).

**Step 4:** The substituted furan **3a** (218 mg, 1.0 mmol, 1.0 equiv.) was dissolved in dry HMPA (5 mL). At room temperature, NaH (26.4 mg, 1.1 mmol, 1.1 equiv.) was added. After 1 hour, the compound **27** (356 mg, 1.5 mmol, 1.5 equiv.) in 4 mL of HMPA was added in drops. The mixture was stirred at room temperature overnight. Then 10 mL of saturated aq NH<sub>4</sub>Cl solution was added to quench the reaction. The solution was extracted thrice with ethyl acetate, washed three times with brine, and dried over Na<sub>2</sub>SO<sub>4</sub>. Evaporation of solvent and purification by flash chromatography (hexane/ethyl acetate, 20:1) afforded product **E-1z** (173 mg, 0.46 mmol, 46% yield).

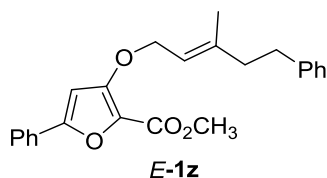

**Methyl (E)-3-((3-methyl-5-phenylpent-2-en-1-yl)oxy)-5-phenylfuran-2-carboxylate (E-1z);**  
Synthesized by the general procedure, the reported yield is overall yield from ketone.

**Yield:** 24% yield (clear oil);

**<sup>1</sup>H NMR** (400 MHz, CDCl<sub>3</sub>) δ 7.74 (d, *J* = 6.8 Hz, 2H), 7.52 – 7.32 (m, 3H), 7.27 – 7.21 (m, 2H), 7.15 (d, *J* = 6.4 Hz, 3H), 6.54 (d, *J* = 1.6 Hz, 1H), 5.52 (s, 1H), 4.70 (d, *J* = 5.6 Hz, 2H), 3.90 (d, *J* = 2.0 Hz, 3H), 2.75 (t, *J* = 7.2 Hz, 2H), 2.37 (t, *J* = 7.2 Hz, 2H), 1.80 (s, 3H).

**<sup>13</sup>C NMR** (101 MHz, CDCl<sub>3</sub>) δ 159.3, 155.4, 141.7, 141.3, 129.4, 129.3, 128.8, 128.3, 128.0, 125.9, 124.9, 119.5, 98.0, 68.7, 51.4, 41.2, 34.1, 17.0;

**HRMS** (ESI) calcd for [M+H]<sup>+</sup>: C<sub>24</sub>H<sub>25</sub>O<sub>4</sub>, *m/z*: 377.1747, observed: 377.1743.

### General procedure for the catalytic asymmetric Claisen rearrangement of substituted furans

In a test tube with a magnetic stirring bar, *N,N'*-dioxide ligand (**L-PiMe<sub>2</sub>** or *ent*-**L-PiMe<sub>2</sub>** or *ent*-**L-PiMe<sub>3</sub>**) (10 mol%), Ni(BF<sub>4</sub>)<sub>2</sub> · 6H<sub>2</sub>O (10 mol%) in CH<sub>2</sub>Cl<sub>2</sub> (0.01 M) were stirred at 35 °C for 1h. Then removing CH<sub>2</sub>Cl<sub>2</sub> and adding the substrate **1**, DCE (0.1 M). The mixture was stirred at 35 °C for 4 - 8 days. The reaction mixture was detected by TLC. After completion, flash column chromatography was carried out to provide the desired product. The product was analyzed by HPLC and NMR.

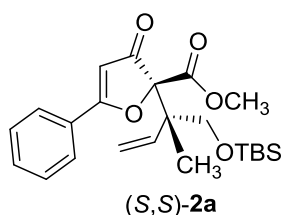

**Methyl-(S)-2-((S)-1-((tert-butyl)dimethylsilyloxy)-2-methylbut-3-en-2-yl)-3-oxo-5-phenyl-2,3-dihydrofuran-2-carboxylate (2a)**

Colourless oil; 37.4 mg, 90% yield, 99%/98% ee, 8:1 dr; [α]<sub>D</sub><sup>25</sup> = -106 (c 0.36, CH<sub>2</sub>Cl<sub>2</sub>); Determined by HPLC analysis [Daicel chiralpak IC, n-hexane/*i*-PrOH = 90/10, 0.8 mL/min, λ = 254 nm, t<sub>1</sub> = 15.30 min, t<sub>2</sub> =

16.17 min,  $t_3 = 18.85$  min,  $t_4 = 19.62$  min];

$^1\text{H NMR}$  (400 MHz,  $\text{CDCl}_3$ )  $\delta$  7.76 – 7.63 (m, 2H), 7.43 – 7.27 (m, 3H), 6.54 (s, 1H), 5.81 – 5.69 (m, 1H), 4.71 (d,  $J = 6.4$  Hz, 2H), 4.01 (s, 2H), 3.84 (s, 3H), 1.68 (s, 3H), 0.84 (s, 9H), 0.00 (s, 6H);

$^{13}\text{C NMR}$  (101 MHz,  $\text{CDCl}_3$ )  $\delta$  159.3, 155.5, 155.3, 140.5, 129.3, 128.8, 124.8, 118.1, 98.1, 68.4, 67.4, 51.4, 25.9, 18.4, 13.9, -5.4;

**HRMS** (ESI) calcd for  $[\text{M}+\text{H}]^+$ :  $\text{C}_{23}\text{H}_{33}\text{O}_5\text{Si}$ ,  $m/z$ : 417.2091, observed: 417.2102;

*Chiral HPLC spectrum of racemic 2a*

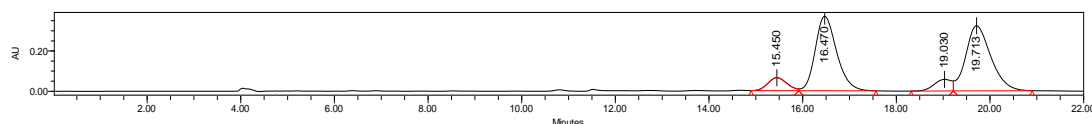

|   | Retention Time | Area     | % Area |
|---|----------------|----------|--------|
| 1 | 15.450         | 1816592  | 6.71   |
| 2 | 16.470         | 11718615 | 43.28  |
| 3 | 19.030         | 1489583  | 5.50   |
| 4 | 19.713         | 12049243 | 44.50  |

*Chiral HPLC spectrum of cat-2a*

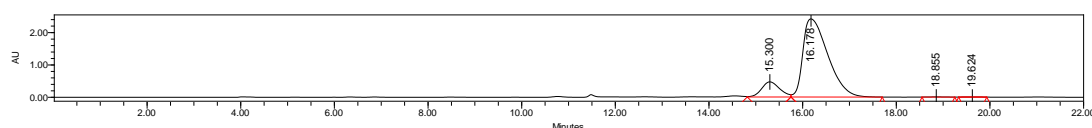

|   | Retention Time | Area     | % Area |
|---|----------------|----------|--------|
| 1 | 15.300         | 12512310 | 12.27  |
| 2 | 16.178         | 89268493 | 87.55  |
| 3 | 18.855         | 104746   | 0.10   |
| 4 | 19.624         | 82323    | 0.08   |

|   | Retention Time | Area     | % Area |
|---|----------------|----------|--------|
| 1 | 16.178         | 89268493 | 99.91  |
| 2 | 19.624         | 82323    | 0.09   |

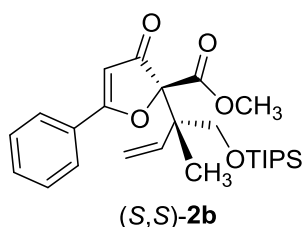

**Methyl-(S)-2-((S)-2-methyl-1-((triisopropylsilyloxy)but-3-en-2-yl)-3-oxo-5-phenyl-2,3-dihydrofuran-2-carboxylate;**

0.1 mmol scale reaction;

colourless oil; 43.9 mg, 96% yield, 99% ee, 10:1 dr;  $[\alpha]_{\text{D}}^{25} = -75.8$  (c 1.96,  $\text{CH}_2\text{Cl}_2$ ); Determined by HPLC analysis [Daicel chiralpak IE, n-hexane/i-PrOH = 95/5, 1.0 mL/min,  $\lambda = 254$  nm,  $t_1 = 23.60$  min,  $t_2 = 24.90$  min,  $t_3 = 27.02$  min,  $t_4 = 29.92$  min];

$^1\text{H NMR}$  (400 MHz,  $\text{CDCl}_3$ )  $\delta$  7.86 (d,  $J = 7.2$  Hz, 2H), 7.61-7.55 (m, 1H), 7.54 – 7.48 (m, 2H), 6.21 (dd,  $J = 17.6, 10.4$  Hz, 1H), 5.97 (s, 1H), 5.21 (dd,  $J = 16.0, 12.0$  Hz, 2H), 3.88 (d,  $J = 9.6$  Hz, 1H), 3.89 – 3.74 (m, 2H), 3.72 (s, 3H), 1.42 (s, 3H), 1.07 – 1.04 (m, 3H), 1.03 – 0.98 (m, 18H);

$^{13}\text{C NMR}$  (101 MHz,  $\text{CDCl}_3$ )  $\delta$  196.3, 184.0, 165.2, 138.1, 132.8, 128.9, 128.5, 127.1, 116.2, 101.3, 92.6, 67.6, 52.9, 50.4, 18.0, 15.5, 12.0;

**HRMS** (ESI) calcd for  $[\text{M}+\text{H}]^+$ :  $\text{C}_{26}\text{H}_{39}\text{O}_5\text{Si}$ ,  $m/z$ : 459.2561, observed: 459.2567.

Chiral HPLC spectrum of racemic **2b**

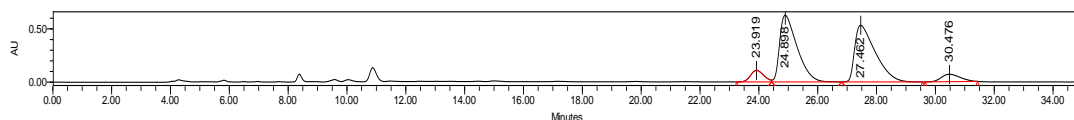

|   | Retention Time | Area     | % Area |
|---|----------------|----------|--------|
| 1 | 23.919         | 3367427  | 5.81   |
| 2 | 24.898         | 25755720 | 44.47  |
| 3 | 27.462         | 25684924 | 44.35  |
| 4 | 30.476         | 3110908  | 5.37   |

Chiral HPLC spectrum of *cat*-**2b** (*E*-**1b** as the starting material)

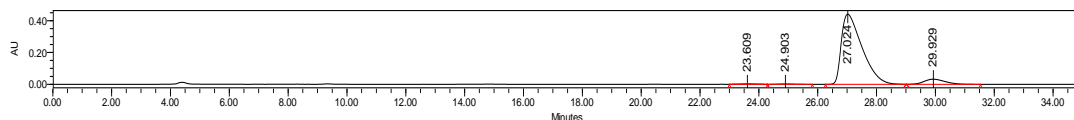

|   | Retention Time | Area     | % Area |
|---|----------------|----------|--------|
| 1 | 23.609         | 40854    | 0.18   |
| 2 | 24.903         | 46344    | 0.20   |
| 3 | 27.024         | 21431588 | 93.37  |
| 4 | 29.929         | 1433601  | 6.25   |

|   | Retention Time | Area     | % Area |
|---|----------------|----------|--------|
| 1 | 24.903         | 46344    | 0.22   |
| 2 | 27.024         | 21431588 | 99.78  |

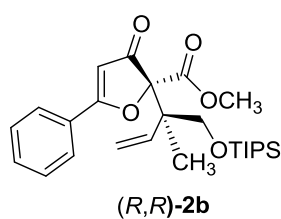

**Methyl-(*R*)-2-((*R*)-2-methyl-1-((triisopropylsilyloxy)but-3-en-2-yl)-3-oxo-5-phenyl-2,3-dihydrofuran-2-carboxylate;**

0.1 mmol scale reaction;  
 colourless oil; 43.5 mg, 95% yield, 99% ee, 10:1 dr; Determined by HPLC analysis [Daicel chiralpak IE, n-hexane/*i*-PrOH = 95/5, 1.0 mL/min,  $\lambda$  = 254 nm,  $t_1$  = 23.87 min,  $t_2$  = 24.93 min,  $t_3$  = 28.02 min,  $t_4$  = 30.61 min];

**HRMS** (ESI) calcd for  $[M+H]^+$ : C<sub>26</sub>H<sub>39</sub>O<sub>5</sub>Si,  $m/z$ : 459.2561, observed: 459.2566.

*Ent*-*cat*-**2b** (*E*-**1b** as the starting material)

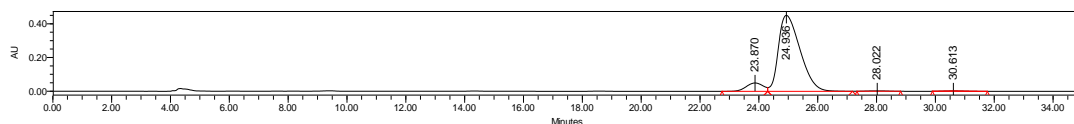

|   | Retention Time | Area     | % Area |
|---|----------------|----------|--------|
| 1 | 23.870         | 1964654  | 7.79   |
| 2 | 24.936         | 23052824 | 91.40  |
| 3 | 28.022         | 98262    | 0.39   |
| 4 | 30.613         | 104831   | 0.42   |

|   | Retention Time | Area     | % Area |
|---|----------------|----------|--------|
| 1 | 24.936         | 23052824 | 99.58  |
| 2 | 28.022         | 98262    | 0.42   |

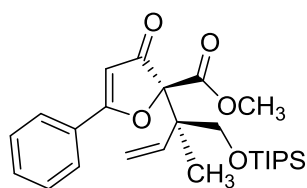

**(S,R)-2b'**

**Methyl-(S)-2-((R)-2-methyl-1-((triisopropylsilyloxy)but-3-en-2-yl)-3-oxo-5-phenyl-2,3-dihydrofuran-2-carboxylate**

0.1 mmol scale reaction;  
 colourless oil; 43.5 mg, 95% yield, 99% ee, 15:1 dr;  $[\alpha]_D^{25} = -170.6$  (c 0.34,  $\text{CH}_2\text{Cl}_2$ ); Determined by HPLC analysis [Daicel chiralpak IE, n-hexane/i-PrOH = 95/5, 1.0 mL/min,  $\lambda = 254$  nm,  $t_1 = 23.82$  min,  $t_2 =$

25.33 min,  $t_3 = 27.81$  min,  $t_4 = 29.87$  min];

$^1\text{H NMR}$  (400 MHz,  $\text{CDCl}_3$ )  $\delta$  7.89 – 7.83 (m, 2H), 7.62 – 7.56 (m, 1H), 7.58 – 7.55 (m, 2H), 6.00 (dd,  $J = 17.6, 11.2$  Hz, 1H), 5.94 (s, 1H), 5.21 (dd,  $J = 17.4, 11.2$  Hz, 2H), 3.98 (d,  $J = 9.6$  Hz, 1H), 3.73 (s, 3H), 3.68 (d,  $J = 9.6$  Hz, 1H), 1.50 (s, 3H), 1.06 (s, 21H);

$^{13}\text{C NMR}$  (101 MHz,  $\text{CDCl}_3$ )  $\delta$  196.7, 184.4, 164.9, 137.4, 132.9, 128.9, 128.4, 127.2, 116.5, 101.2, 92.5, 68.0, 52.7, 49.7, 18.0, 15.5, 12.0;

**HRMS** (ESI) calcd for  $[\text{M}+\text{H}]^+$ :  $\text{C}_{26}\text{H}_{39}\text{O}_5\text{Si}$ , m/z: 459.2561, observed: 459.2560.

Chiral HPLC spectrum of *cat*-2b (*Z*-1b' as the starting material)

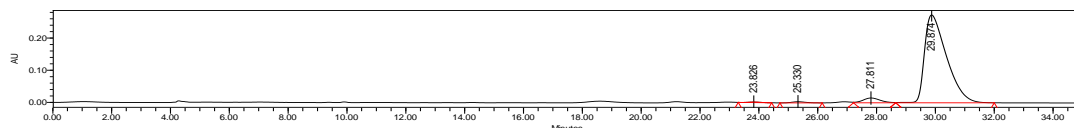

|   | Retention Time | Area     | % Area |
|---|----------------|----------|--------|
| 1 | 23.826         | 46295    | 0.31   |
| 2 | 25.330         | 108365   | 0.73   |
| 3 | 27.811         | 617452   | 4.14   |
| 4 | 29.874         | 14142251 | 94.82  |

|   | Retention Time | Area     | % Area |
|---|----------------|----------|--------|
| 1 | 23.826         | 44469    | 0.31   |
| 2 | 29.874         | 14142251 | 99.69  |

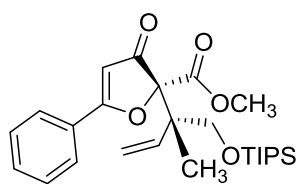

**(R,S)-2b'**

**methyl-(R)-2-((S)-2-methyl-1-((triisopropylsilyloxy)but-3-en-2-yl)-3-oxo-5-phenyl-2,3-dihydrofuran-2-carboxylate**

0.1 mmol scale reaction;  
 colourless oil; 43.5 mg, 95% yield, 99% ee, 15:1 dr; Determined by HPLC analysis [Daicel chiralpak IE, n-hexane/i-PrOH = 95/5, 1.0 mL/min,  $\lambda = 254$  nm,  $t_1 = 23.51$  min,  $t_2 = 25.02$  min,  $t_3 = 26.75$  min,  $t_4 = 30.20$  min];

**HRMS** (ESI) calcd for  $[\text{M}+\text{H}]^+$ :  $\text{C}_{26}\text{H}_{39}\text{O}_5\text{Si}$ , m/z: 459.2560, observed: 459.2554.

Chiral HPLC spectrum of *ent-cat*-2b (*Z*-1b' as the starting material)

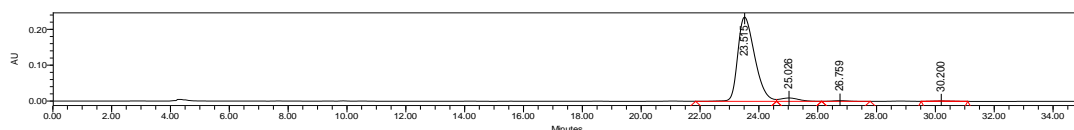

|  | Retention Time | Area | % Area |
|--|----------------|------|--------|
|--|----------------|------|--------|

|   |        |         |       |
|---|--------|---------|-------|
| 1 | 23.515 | 9359725 | 94.64 |
| 2 | 25.026 | 411624  | 4.16  |
| 3 | 26.759 | 74728   | 0.76  |
| 4 | 30.200 | 43461   | 0.44  |

|   | Retention Time | Area    | % Area |
|---|----------------|---------|--------|
| 1 | 23.515         | 9359725 | 99.54  |
| 2 | 30.200         | 43461   | 0.46   |

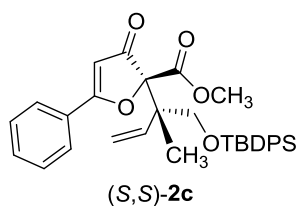

**Methyl-(S)-2-((S)-1-((*tert*-butyldiphenylsilyl)oxy)-2-methylbut-3-en-2-yl)-3-oxo-5-phenyl-2,3-dihydrofuran-2-carboxylate (**2c**)**

0.1 mmol scale reaction;

colourless oil; 48.6 mg, 90% yield, 99%/93% ee, 5:1 dr;  $[\alpha]_D^{25} = -131$  (c 0.3, CH<sub>2</sub>Cl<sub>2</sub>); Determined by HPLC analysis [Daicel chiralpak IC, n-hexane/*i*-PrOH = 90/10, 1.0 mL/min,  $\lambda = 254$  nm,  $t_1 = 13.26$  min,  $t_2 =$

14.90 min,  $t_3 = 17.41$  min,  $t_4 = 19.74$  min];

<sup>1</sup>H NMR (400 MHz, CDCl<sub>3</sub>)  $\delta$  7.84 (d,  $J = 7.2$  Hz, 2H), 7.64 -7.59 (m, 3H), 7.51 (d,  $J = 8.0$  Hz, 3H), 7.41 – 7.29 (m, 5H), 7.14 (t,  $J = 8.0$  Hz, 2H), 6.15 (dd,  $J = 17.6, 11.2$  Hz, 1H), 5.99 (s, 1H), 5.19 (dd,  $J = 17.6, 11.6$  Hz, 2H), 3.81 (d,  $J = 10.0$  Hz, 1H), 3.67 (s, 3H), 3.48 (d,  $J = 10.0$  Hz, 1H), 1.47 (s, 3H), 1.01 (s, 9H);

<sup>13</sup>C NMR (101 MHz, CDCl<sub>3</sub>)  $\delta$  196.1, 183.8, 165.2, 138.0, 135.6, 133.1, 132.9, 132.8, 129.7, 129.5, 129.0, 128.5, 127.6, 127.5, 127.2, 116.4, 101.4 92.6, 67.8, 52.9, 50.4, 26.8, 19.3, 15.6;

HRMS (ESI) calcd for [M+H]<sup>+</sup>: C<sub>33</sub>H<sub>37</sub>O<sub>5</sub>Si, m/z: 541.2405, observed: 541.2410.

Chiral HPLC spectrum of racemic **2c**

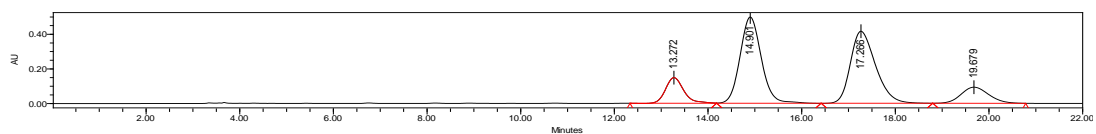

|   | Retention Time | Area     | % Area |
|---|----------------|----------|--------|
| 1 | 13.272         | 3997123  | 10.26  |
| 2 | 14.901         | 15663341 | 40.19  |
| 3 | 17.266         | 15487960 | 39.74  |
| 4 | 19.679         | 3826218  | 9.82   |

Chiral HPLC spectrum of *cat*-**2c**

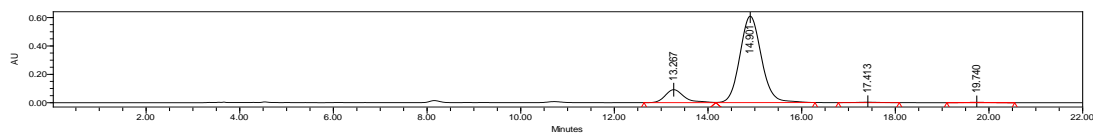

|   | Retention Time | Area     | % Area |
|---|----------------|----------|--------|
| 1 | 13.267         | 2565439  | 11.62  |
| 2 | 14.901         | 19330788 | 87.54  |
| 3 | 17.413         | 97640    | 0.44   |
| 4 | 19.740         | 88469    | 0.40   |



|   | Retention Time | Area     | % Area |
|---|----------------|----------|--------|
| 1 | 14.901         | 19330788 | 99.50  |
| 2 | 17.413         | 97640    | 0.50   |

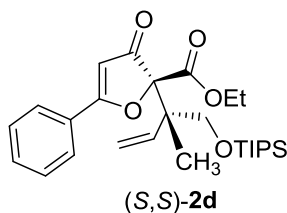

**Ethyl-(S)-2-((S)-2-methyl-1-((triisopropylsilyl)oxy)but-3-en-2-yl)-3-oxo-5-phenyl-2,3-dihydrofuran-2-carboxylate (2d)**

0.1 mmol scale reaction;

colourless oil; 44.4 mg, 94% yield, 99%/96% ee, 5:1 dr;  $[\alpha]_D^{25} = -125.9$  (c 0.82,  $\text{CH}_2\text{Cl}_2$ ); Determined by HPLC analysis [Daicel chiralpak IE, n-hexane/i-PrOH = 95/5, 1.0 mL/min,  $\lambda = 254$  nm,  $t_1 = 14.42$  min,  $t_2 =$

16.25 min,  $t_3 = 18.29$  min,  $t_4 = 19.53$  min];

**$^1\text{H}$  NMR** (400 MHz,  $\text{CDCl}_3$ )  $\delta$  7.88 – 7.84 (m, 2H), 7.55 – 7.54 (m, 1H), 7.54 – 7.47 (m, 2H), 6.17 (dd,  $J = 17.6, 11.2$  Hz, 1H), 5.95 (s, 1H), 5.28 – 5.18 (m, 2H), 4.25 – 4.14 (m, 2H), 3.90 (d,  $J = 8.8$  Hz, 1H), 3.72 (d,  $J = 8.8$  Hz, 1H), 1.47 (s, 3H), 1.23 (t,  $J = 6.8$  Hz, 3H), 1.04 – 0.94 (m, 21H);

**$^{13}\text{C}$  NMR** (101 MHz,  $\text{CDCl}_3$ )  $\delta$  196.4, 183.9, 164.7, 138.3, 132.7, 128.9, 128.6, 127.11 (d,  $J = 4.8$  Hz, 7H), 116.3, 101.3, 92.6, 67.5, 62.1, 50.4, 18.0, 15.5, 14.0, 12.0;

**HRMS** (ESI) calcd for  $[\text{M}+\text{H}]^+$ :  $\text{C}_{27}\text{H}_{41}\text{O}_5\text{Si}$ , m/z: 473.2718, observed: 473.2715.

*Chiral HPLC spectrum of racemic 2d*

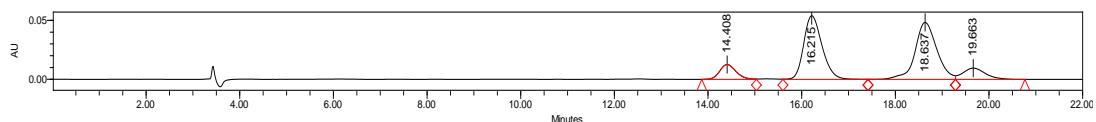

|   | Retention Time | Area    | % Area |
|---|----------------|---------|--------|
| 1 | 14.408         | 305501  | 8.37   |
| 2 | 16.215         | 1468058 | 40.24  |
| 3 | 18.637         | 1556003 | 42.65  |
| 4 | 19.663         | 318963  | 8.74   |

*Chiral HPLC spectrum of cat-2d*

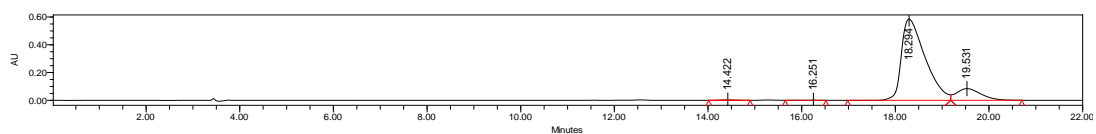

|   | Retention Time | Area     | % Area |
|---|----------------|----------|--------|
| 1 | 14.422         | 53305    | 0.22   |
| 2 | 16.251         | 20686    | 0.09   |
| 3 | 18.294         | 20570397 | 86.74  |
| 4 | 19.531         | 3071131  | 12.95  |

|   | Retention Time | Area     | % Area |
|---|----------------|----------|--------|
| 1 | 16.251         | 20686    | 0.10   |
| 2 | 18.294         | 20570397 | 99.90  |

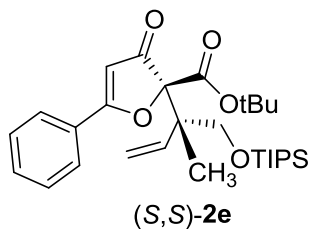

**Tert-butyl-(S)-2-((S)-2-methyl-1-((triisopropylsilyl)oxy)but-3-en-2-yl)-3-oxo-5-phenyl-2,3-dihydrofuran-2-carboxylate (**2e**)**

0.1 mmol scale reaction;

colourless oil; 45 mg, 90% yield, 99%/98% ee, 1.5:1 dr;  $[\alpha]_D^{25} = -173.8$  (c 0.18,  $\text{CH}_2\text{Cl}_2$ ); Determined by HPLC analysis [Daicel chiralpak Lux 5u Cellulose-2, n-hexane/*i*-PrOH = 99/1, 1.0 mL/min,  $\lambda = 254$  nm,  $t_1 = 9.43$  min,  $t_2 = 10.65$  min,  $t_3 = 12.89$  min,  $t_4 = 14.76$  min];

$^1\text{H NMR}$  (400 MHz,  $\text{CDCl}_3$ )  $\delta$  7.85 (d,  $J = 7.6$  Hz, 2H), 7.60 – 7.43 (m, 3H), 6.07 (dd,  $J = 17.6, 10.8$  Hz, 1H), 5.92 (s, 1H), 5.20 (d,  $J = 12.4$  Hz, 2H), 3.92 (d,  $J = 9.6$  Hz, 1H), 3.66 (d,  $J = 9.6$  Hz, 1H), 1.55 (s, 2H), 1.44 (s, 9H), 1.05 – 0.95 (dd,  $J = 7.2, 3.0$  Hz, 21H);

$^{13}\text{C NMR}$  (101 MHz,  $\text{CDCl}_3$ )  $\delta$  196.6, 183.6, 163.5, 138.6, 132.6, 128.9, 128.8, 127.1, 127.0, 116.3, 114.9, 101.3, 93.2, 92.9, 83.4, 68.0, 67.5, 50.3, 49.5, 27.9, 18.0, 15.6, 12.0;

**HRMS** (ESI) calcd for  $[\text{M}+\text{H}]^+$ :  $\text{C}_{29}\text{H}_{45}\text{O}_5\text{Si}$ ,  $m/z$ : 501.3031, observed: 501.3018;

*Chiral HPLC spectrum of racemic 2e*

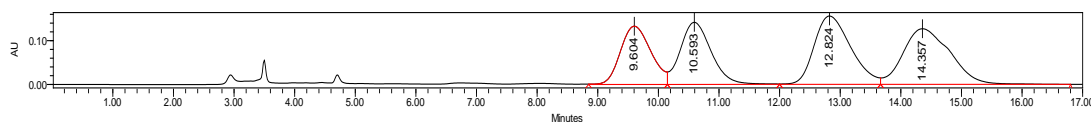

|   | Retention Time | Area    | % Area |
|---|----------------|---------|--------|
| 1 | 9.604          | 4638675 | 20.13  |
| 2 | 10.593         | 5029922 | 21.83  |
| 3 | 12.824         | 6547834 | 28.41  |
| 4 | 14.357         | 6828957 | 29.63  |

*Chiral HPLC spectrum of cat-2e*

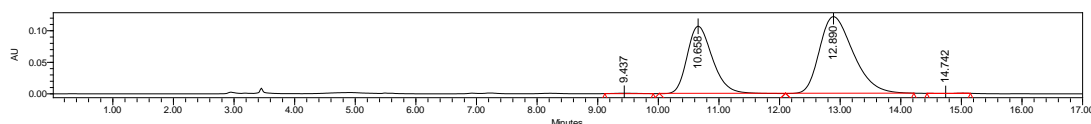

|   | Retention Time | Area    | % Area |
|---|----------------|---------|--------|
| 1 | 9.437          | 16037   | 0.21   |
| 2 | 10.658         | 3063853 | 39.44  |
| 3 | 12.890         | 4681479 | 60.27  |
| 4 | 14.742         | 6234    | 0.08   |

|   | Retention Time | Area    | % Area |
|---|----------------|---------|--------|
| 1 | 12.890         | 4681479 | 99.87  |
| 2 | 14.742         | 6234    | 0.13   |

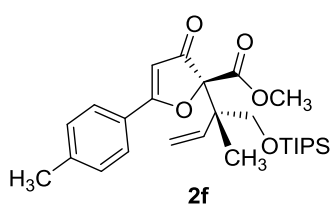

**Methyl-(S)-2-((S)-2-methyl-1-((triisopropylsilyl)oxy)but-3-en-2-yl)-3-oxo-5-(p-tolyl)-2,3-dihydrofuran-2-carboxylate;**

0.19 mmol scale reaction;

colourless oil; 86 mg, 95% yield, 99%/96% ee, 9:1 dr;  $[\alpha]_D^{25} = -121.6$  (c 0.91,  $\text{CH}_2\text{Cl}_2$ ); Determined by HPLC analysis [Daicel chiralpak IE, n-hexane/*i*-PrOH = 95/5, 1.0 mL/min,  $\lambda = 254$  nm,  $t_1 = 30.91$  min,  $t_2 =$

32.67 min,  $t_3 = 42.17$  min,  $t_4 = 46.3$  min];

$^1\text{H NMR}$  (400 MHz,  $\text{CDCl}_3$ )  $\delta$  7.75 (d,  $J = 8.2$  Hz, 2H), 7.30 (d,  $J = 8.0$  Hz, 2H), 6.21 (dd,  $J = 18.0$ , 10.8 Hz, 1H), 5.91 (s, 1H), 5.21 (dd,  $J = 15.6$ , 12.0 Hz, 2H), 3.87 (d,  $J = 9.6$  Hz, 1H), 3.74 (d,  $J = 9.6$  Hz, 1H), 3.71 (s, 3H), 2.43 (s, 3H), 1.40 (s, 3H), 1.05–0.96 (m, 21H);

$^{13}\text{C NMR}$  (101 MHz,  $\text{CDCl}_3$ )  $\delta$  195.2, 183.3, 164.3, 142.7, 137.2, 128.6, 126.1, 124.7, 115.1, 99.6, 91.5, 66.5, 51.8, 49.3, 20.7, 16.9, 14.5, 11.0;

**HRMS** (ESI) calcd for  $[\text{M}+\text{H}]^+$ :  $\text{C}_{27}\text{H}_{41}\text{O}_5\text{Si}$ ,  $m/z$ : 473.2723, observed: 473.2726.

*Chiral HPLC spectrum of racemic 2f:*

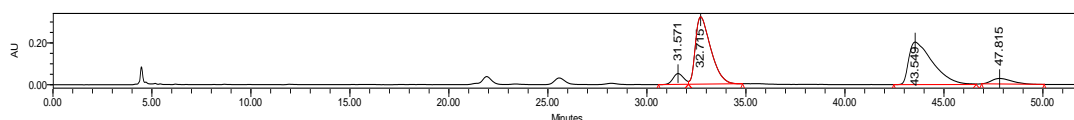

|   | Retention Time | Area     | % Area |
|---|----------------|----------|--------|
| 1 | 31.571         | 1959036  | 5.12   |
| 2 | 32.715         | 17353700 | 45.34  |
| 3 | 43.549         | 17054420 | 44.56  |
| 4 | 47.815         | 1906625  | 4.98   |

*Chiral HPLC spectrum of cat-2f:*

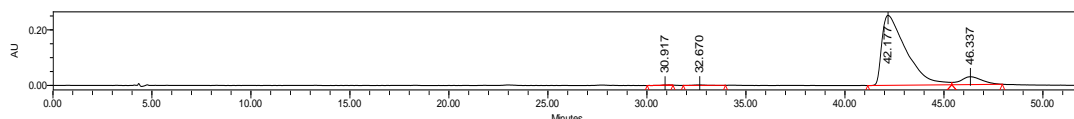

|   | Retention Time | Area     | % Area |
|---|----------------|----------|--------|
| 1 | 30.917         | 50950    | 0.21   |
| 2 | 32.670         | 53652    | 0.22   |
| 3 | 42.177         | 21565624 | 90.38  |
| 4 | 46.337         | 2190474  | 9.18   |

|   | Retention Time | Area     | % Area |
|---|----------------|----------|--------|
| 1 | 32.670         | 68856    | 0.32   |
| 2 | 42.177         | 21413962 | 99.68  |

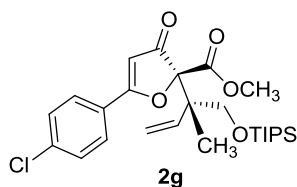

**Methyl-(S)-5-(4-chlorophenyl)-2-((S)-2-methyl-1-((triisopropylsilyl)oxy)but-3-en-2-yl)-3-oxo-2,3-dihydrofuran-2-carboxylate;**

0.3 mmol scale reaction;

colourless oil; 142 mg, 95% yield, 99%/98% ee, 8:1 dr;  $[\alpha]_{\text{D}}^{25} = -137.8$  (c 1.06,  $\text{CH}_2\text{Cl}_2$ ); Determined by HPLC analysis [Daicel chiralpak ADH, n-hexane/i-PrOH = 97/3, 1.0 mL/min,  $\lambda = 254$  nm,  $t_1 = 6.76$  min,  $t_2 =$

7.88 min,  $t_3 = 8.60$  min,  $t_4 = 9.63$  min];

$^1\text{H NMR}$  (400 MHz,  $\text{CDCl}_3$ )  $\delta$  7.80 (d,  $J = 8.0$  Hz, 2H), 7.49 (d,  $J = 8.0$  Hz, 2H), 6.18 (dd,  $J = 18.0$ , 10.8 Hz, 1H), 5.96 (s, 1H), 5.23 (dd,  $J = 16.4$ , 12.0 Hz, 2H), 3.88 (d,  $J = 9.6$  Hz, 1H), 3.73 (s, 3H), 3.70 (d,  $J = 9.6$  Hz, 1H), 1.44 (s, 3H), 1.01 (s, 21H);

$^{13}\text{C NMR}$  (101 MHz,  $\text{CDCl}_3$ )  $\delta$  196.0, 182.6, 165.0, 139.0, 138.0, 129.3, 128.3, 127.0, 116.3, 101.5, 92.7, 67.6, 52.9, 50.4, 17.9, 15.5, 12.0;

**HRMS** (ESI) calcd for  $[\text{M}+\text{H}]^+$ :  $\text{C}_{26}\text{H}_{38}\text{O}_5\text{SiCl}$ ,  $m/z$ : 493.2177, 495.2148, observed: 493.2177,

495.2178.

Chiral HPLC spectrum of racemic **2g**:

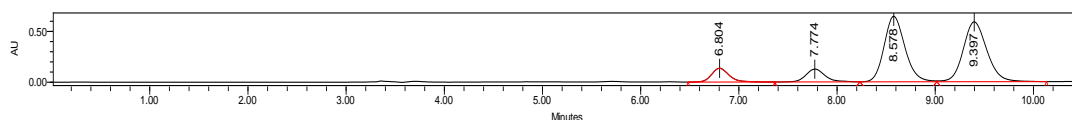

|   | Retention Time | Area    | % Area |
|---|----------------|---------|--------|
| 1 | 6.804          | 1671811 | 7.35   |
| 2 | 7.774          | 1726118 | 7.58   |
| 3 | 8.578          | 9523280 | 41.84  |
| 4 | 9.397          | 9838022 | 43.23  |

Chiral HPLC spectrum of *cat*-**2g**:

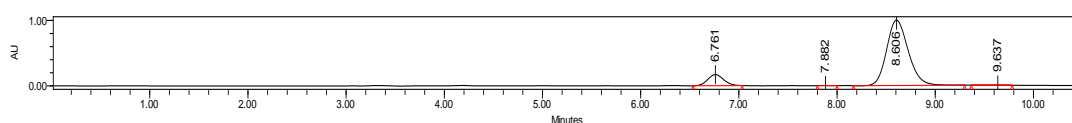

|   | Retention Time | Area     | % Area |
|---|----------------|----------|--------|
| 1 | 6.761          | 1909346  | 11.14  |
| 2 | 7.882          | 11875    | 0.07   |
| 3 | 8.606          | 15188559 | 88.66  |
| 4 | 9.637          | 22296    | 0.13   |

|   | Retention Time | Area     | % Area |
|---|----------------|----------|--------|
| 1 | 8.606          | 15188559 | 99.85  |
| 2 | 9.637          | 22296    | 0.15   |

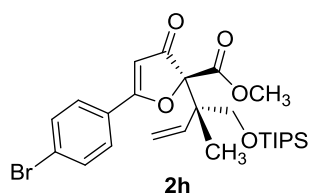

**Methyl-(*S*)-5-(4-bromophenyl)-2-(((*S*)-2-methyl-1-((triisopropylsilyl)oxy)but-3-en-2-yl)-3-oxo-2,3-dihydrofuran-2-carboxylate;**

0.27 mmol scale reaction;

colourless oil; 134 mg, 92% yield, 99%/96% ee, 9:1 dr;  $[\alpha]_{\text{D}}^{25} = -131.9$  (c 0.63,  $\text{CH}_2\text{Cl}_2$ ); Determined by HPLC analysis [Daicel chiralpak

ADH, n-hexane/*i*-PrOH = 97/3, 1.0 mL/min,  $\lambda = 254$  nm,  $t_1 = 6.83$  min,  $t_2 = 7.72$  min,  $t_3 = 8.74$  min,  $t_4 = 9.90$  min];

**$^1\text{H}$  NMR** (400 MHz,  $\text{CDCl}_3$ )  $\delta$  7.72 (d,  $J = 8.4$  Hz, 2H), 7.64 (d,  $J = 8.4$  Hz, 2H), 6.16 (dd,  $J = 17.6$ , 10.4 Hz, 1H), 5.95 (s, 1H), 5.22 (dd,  $J = 15.6$ , 11.6 Hz, 2H), 3.86 (d,  $J = 9.6$  Hz, 1H), 3.71 (s, 3H), 3.68 (d,  $J = 9.6$  Hz, 1H), 1.42 (s, 3H), 1.05-0.96 (m, 21H);

**$^{13}\text{C}$  NMR** (101 MHz,  $\text{CDCl}_3$ )  $\delta$  196.0, 182.7, 165.0, 138.0, 132.3, 128.4, 127.6, 127.4, 116.4, 101.6, 92.8, 67.6, 52.9, 50.4, 18.0, 15.5, 12.0;

**HRMS** (ESI) calcd for  $[\text{M}+\text{H}]^+$ :  $\text{C}_{26}\text{H}_{38}\text{O}_5\text{SiBr}$ ,  $m/z$ : 537.1672, 539.1651, observed: 537.1671, 539.1655.

Chiral HPLC spectrum of racemic **2h**:

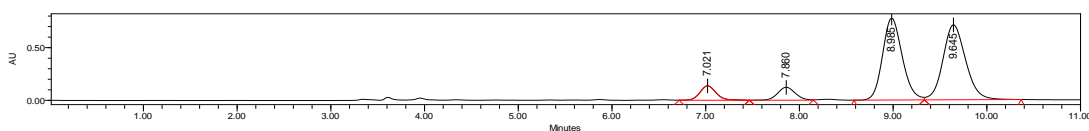

|   | Retention Time | Area     | % Area |
|---|----------------|----------|--------|
| 1 | 7.021          | 1645496  | 6.20   |
| 2 | 7.860          | 1608050  | 6.06   |
| 3 | 8.985          | 11329461 | 42.67  |
| 4 | 9.645          | 11967054 | 45.07  |

Chiral HPLC spectrum of **cat-2h**:

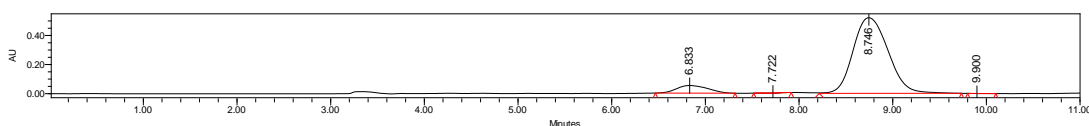

|   | Retention Time | Area     | % Area |
|---|----------------|----------|--------|
| 1 | 6.833          | 1215961  | 8.25   |
| 2 | 7.722          | 25423    | 0.17   |
| 3 | 8.746          | 13501679 | 91.56  |
| 4 | 9.900          | 3284     | 0.02   |

|   | Retention Time | Area     | % Area |
|---|----------------|----------|--------|
| 1 | 8.746          | 13501679 | 99.98  |
| 2 | 9.900          | 3284     | 0.02   |

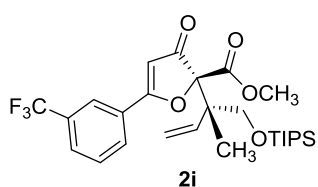

**Methyl-(S)-2-((S)-2-methyl-1-((triisopropylsilyloxy)but-3-en-2-yl)-3-oxo-5-(3-(trifluoromethyl)phenyl)-2,3-dihydrofuran-2-carboxylate;**

0.41 mmol scale reaction;

colourless oil; 200 mg, 92% yield, 99%/96% ee, 8:1 dr;  $[\alpha]_D^{25} = -120.9$  (c 0.86,  $\text{CH}_2\text{Cl}_2$ ); Determined by HPLC analysis [Daicel chiralpak ADH, n-hexane/i-PrOH = 97/3, 1.0 mL/min,  $\lambda = 254$  nm,  $t_1 = 4.99$  min,  $t_2 = 5.66$  min,  $t_3 = 6.81$  min,  $t_4 = 7.75$  min];

$^1\text{H NMR}$  (400 MHz,  $\text{CDCl}_3$ )  $\delta$  8.09 (s, 1H), 8.02 (d,  $J = 7.6$  Hz, 1H), 7.82 (d,  $J = 8.0$  Hz, 1H), 7.66 (t,  $J = 7.6$  Hz, 1H), 6.21 (dd,  $J = 17.6, 10.8$  Hz, 1H), 6.03 (s, 1H), 5.23 (dd,  $J = 17.2, 11.2$  Hz, 2H), 3.87 (d,  $J = 9.6$  Hz, 1H), 3.72 (s, 3H), 3.69 (d,  $J = 9.6$  Hz, 1H), 1.41 (s, 3H), 1.05-0.96 (m, 21H);

$^{13}\text{C NMR}$  (101 MHz,  $\text{CDCl}_3$ )  $\delta$  195.97, 182.00, 164.88, 137.90, 131.61 (d,  $J = 33$  Hz), 130.29, 129.63, 129.41, 129.10 (q,  $J = 4$  Hz), 123.59 (q,  $J = 4$  Hz), 123.5 (q,  $J = 271$ Hz), 116.30, 102.31, 92.93, 67.83, 52.92, 50.43, 17.87, 15.56, 11.96;

**HRMS** (ESI) calcd for  $[\text{M}+\text{H}]^+$ :  $\text{C}_{27}\text{H}_{38}\text{O}_5\text{SiF}_3$ , m/z: 527.2441, observed: 527.2440.

Chiral HPLC spectrum of racemic **2i**:

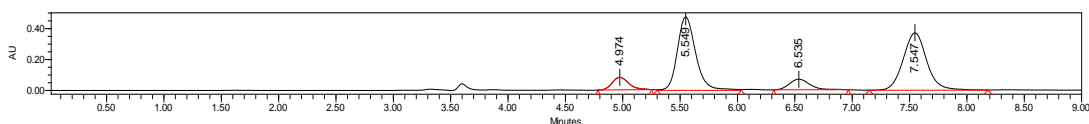

|   | Retention Time | Area    | % Area |
|---|----------------|---------|--------|
| 1 | 4.974          | 945055  | 7.55   |
| 2 | 5.549          | 5289133 | 42.28  |
| 3 | 6.535          | 993976  | 7.95   |
| 4 | 7.547          | 5281761 | 42.22  |

Chiral HPLC spectrum of cat-2i:

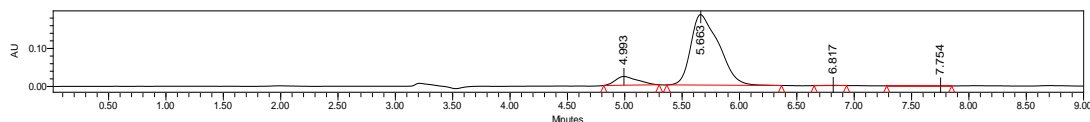

|   | Retention Time | Area    | % Area |
|---|----------------|---------|--------|
| 1 | 4.993          | 310984  | 8.97   |
| 2 | 5.663          | 3145809 | 90.77  |
| 3 | 6.817          | 5352    | 0.15   |
| 4 | 7.754          | 3678    | 0.11   |

|   | Retention Time | Area    | % Area |
|---|----------------|---------|--------|
| 1 | 5.663          | 3151896 | 99.50  |
| 2 | 7.754          | 15866   | 0.50   |

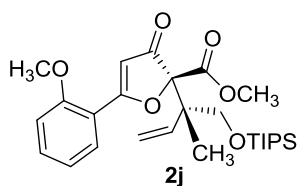

**Methyl-(S)-5-(4-methoxyphenyl)-2-((S)-2-methyl-1-((triisopropylsilyloxy)but-3-en-2-yl)-3-oxo-2,3-dihydrofuran-2-carboxylate;**

0.1 mmol scale reaction;

colourless oil; 48 mg, 99% yield, 99% ee, 12:1 dr;  $[\alpha]_D^{25} = -51.3$  (c 0.46,  $\text{CH}_2\text{Cl}_2$ ); Determined by HPLC analysis [Daicel chiralpak ADH, n-hexane/i-PrOH = 97/3, 1.0 mL/min,  $\lambda = 254$  nm,  $t_1 = 6.94$  min,  $t_2 =$

8.05 min,  $t_3 = 9.85$  min,  $t_4 = 11.28$  min];

**$^1\text{H}$  NMR** (400 MHz,  $\text{CDCl}_3$ )  $\delta$  7.47 – 7.35 (m, 3H), 7.14 – 7.08 (m, 1H), 6.22 (dd,  $J = 11.6, 17.2$  Hz, 1H), 5.94 (s, 1H), 5.22 (dd,  $J = 10.4, 17.2$  Hz, 1H), 3.87 (s, 3H), 3.85 (d,  $J = 9.6$  Hz, 1H), 3.75 (d,  $J = 9.6$  Hz, 1H), 3.72 (s, 3H), 1.40 (s, 3H), 1.07 – 0.99 (m, 21H);

**$^{13}\text{C}$  NMR** (101 MHz,  $\text{CDCl}_3$ )  $\delta$  196.3, 183.9, 165.2, 159.9, 138.1, 130.0, 129.7, 119.8, 118.5, 116.2, 112.1, 101.6, 92.6, 67.6, 55.5, 52.9, 50.3, 18.0, 15.5, 12.0;

**HRMS** (ESI) calcd for  $[\text{M}+\text{H}]^+$ :  $\text{C}_{27}\text{H}_{41}\text{O}_5\text{Si}$ ,  $m/z$ : 489.2672, observed: 489.2672.

Chiral HPLC spectrum of racemic 2j:

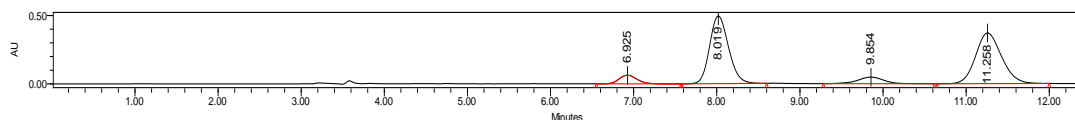

|   | Retention Time | Area    | % Area |
|---|----------------|---------|--------|
| 1 | 6.925          | 950595  | 5.32   |
| 2 | 8.019          | 7814845 | 43.76  |
| 3 | 9.854          | 1052350 | 5.89   |
| 4 | 11.258         | 8041009 | 45.03  |

Chiral HPLC spectrum of cat-2j:

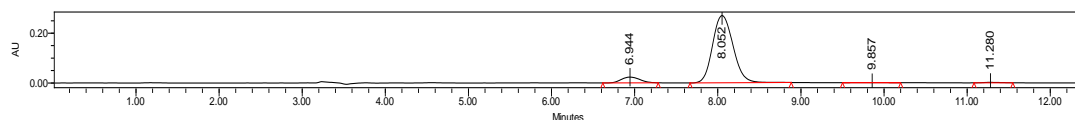

|   | Retention Time | Area    | % Area |
|---|----------------|---------|--------|
| 1 | 6.944          | 359845  | 7.17   |
| 2 | 8.052          | 4623556 | 92.09  |
| 3 | 9.857          | 11538   | 0.23   |
| 4 | 11.280         | 25950   | 0.52   |

|   | Retention Time | Area    | % Area |
|---|----------------|---------|--------|
| 1 | 8.052          | 4623556 | 99.44  |
| 2 | 11.280         | 25950   | 0.56   |

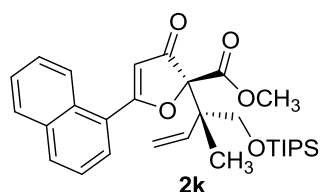

**Methyl-(S)-2-((S)-2-methyl-1-((triisopropylsilyl)oxy)but-3-en-2-yl)-5-(naphthalen-1-yl)-3-oxo-2,3-dihydrofuran-2-carboxylate;**

0.1 mmol scale reaction;  
 colourless oil; 48.9 mg, 96% yield, 99%/98% ee, 9:1 dr;  $[\alpha]_D^{25} = -227.3$  (c 0.84,  $\text{CH}_2\text{Cl}_2$ ); Determined by HPLC analysis [Daicel chiralpak Lux 5u Cellulose-2, n-hexane/i-PrOH = 95/5, 1.0 mL/min,

$\lambda = 254$  nm,  $t_1 = 15.86$  min,  $t_2 = 17.01$  min,  $t_3 = 18.44$  min,  $t_4 = 21.02$  min];

**$^1\text{H NMR}$**  (400 MHz,  $\text{CDCl}_3$ )  $\delta$  8.62 (d,  $J = 8.4$  Hz, 1H), 8.04 (d,  $J = 8.0$  Hz, 1H), 7.98 – 7.90 (m, 2H), 7.65 – 7.53 (m, 3H), 6.30 (dd,  $J = 10.8, 17.2$  Hz, 1H), 6.02 (s, 1H), 5.22 (dd,  $J = 10.4, 17.2$  Hz, 1H), 3.87 (d,  $J = 9.6$  Hz, 2H), 3.81 (s, 3H), 1.41 (s, 3H), 1.08 – 0.99 (m, 21H);

**$^{13}\text{C NMR}$**  (101 MHz,  $\text{CDCl}_3$ )  $\delta$  196.3, 186.0, 165.2, 138.0, 133.8, 133.0, 130.3, 128.8, 128.3, 127.8, 126.6, 125.3, 124.9, 116.3, 105.9, 92.7, 67.5, 53.0, 50.2, 18.0, 15.6, 12.0;

**HRMS** (ESI) calcd for  $[\text{M}+\text{H}]^+$ :  $\text{C}_{30}\text{H}_{41}\text{O}_5\text{Si}$ , m/z: 509.2723, observed: 509.2722.

Chiral HPLC spectrum of racemic 2k:

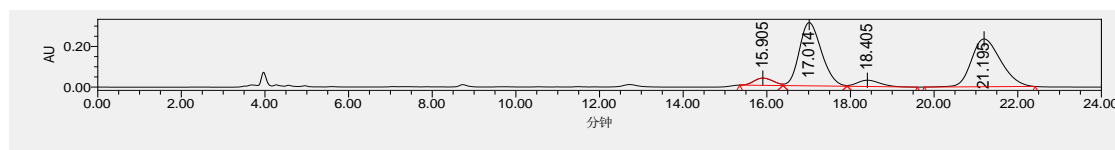

|   | Retention Time | Area     | % Area |
|---|----------------|----------|--------|
| 1 | 15.905         | 1093204  | 4.35   |
| 2 | 17.014         | 11407164 | 45.35  |
| 3 | 18.405         | 1170886  | 4.66   |
| 4 | 21.195         | 11480865 | 45.65  |

Chiral HPLC spectrum of cat-2k:

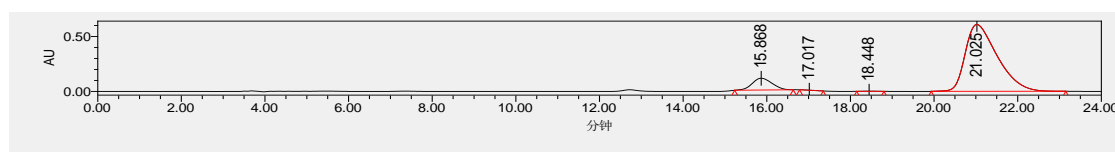

|   | Retention Time | Area     | % Area |
|---|----------------|----------|--------|
| 1 | 15.868         | 3524667  | 9.83   |
| 2 | 17.017         | 22455    | 0.06   |
| 3 | 18.448         | 38467    | 0.11   |
| 4 | 21.025         | 32288537 | 90.01  |

|   | Retention Time | Area     | % Area |
|---|----------------|----------|--------|
| 1 | 17.017         | 22455    | 0.07   |
| 2 | 21.025         | 32288537 | 99.93  |

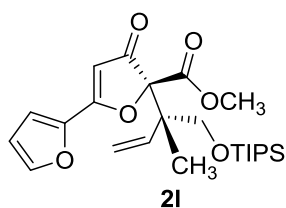

**Methyl-(S)-5-((S)-2-methyl-1-((triisopropylsilyloxy)but-3-en-2-yl)-4-oxo-4,5-dihydro-[2,2'-bifuran]-5-carboxylate;**

0.34 mmol scale reaction;  
 colourless oil; 149 mg, 97% yield, 99%/98% ee, 8:1 dr;  $[\alpha]_D^{25} = -130.1$  (c 0.89,  $\text{CH}_2\text{Cl}_2$ ); Determined by HPLC analysis [Daicel chiralpak ODH, n-hexane/i-PrOH = 99/1, 0.8 mL/min,  $\lambda = 254$  nm,  $t_1 = 13.06$  min,  $t_2 =$

14.76 min,  $t_3 = 15.47$  min,  $t_4 = 16.53$  min];

**$^1\text{H}$  NMR** (400 MHz,  $\text{CDCl}_3$ )  $\delta$  7.64 (s, 1H), 7.14 (d,  $J = 3.6$  Hz, 1H), 6.58 (dd,  $J = 3.2, 1.2$  Hz, 1H), 6.14 (dd,  $J = 18.0, 10.8$  Hz, 1H), 5.80 (s, 1H), 5.16 (dd,  $J = 16.8, 11.6$  Hz, 2H), 3.82 (d,  $J = 9.6$  Hz, 1H), 3.68 (s, 3H), 3.65 (d,  $J = 9.6$  Hz, 1H), 1.36 (s, 3H), 1.02-0.93 (m, 21H);

**$^{13}\text{C}$  NMR** (101 MHz,  $\text{CDCl}_3$ )  $\delta$  195.3, 174.2, 165.1, 147.1, 144.6, 138.1, 116.1, 115.1, 112.6, 100.1, 92.2, 67.7, 52.8, 50.3, 17.9, 15.5, 11.9;

**HRMS** (ESI) calcd for  $[\text{M}+\text{H}]^+$ :  $\text{C}_{24}\text{H}_{37}\text{O}_6\text{Si}$ , m/z: 449.2359, observed: 449.2362.

*Chiral HPLC spectrum of racemic 2I:*

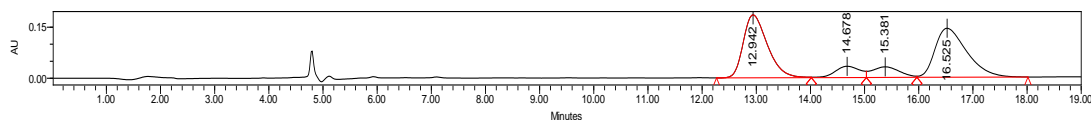

|   | Retention Time | Area    | % Area |
|---|----------------|---------|--------|
| 1 | 12.942         | 5710051 | 41.68  |
| 2 | 14.678         | 1048876 | 7.66   |
| 3 | 15.381         | 1088782 | 7.95   |
| 4 | 16.525         | 5852062 | 42.72  |

*Chiral HPLC spectrum of cat-2I:*

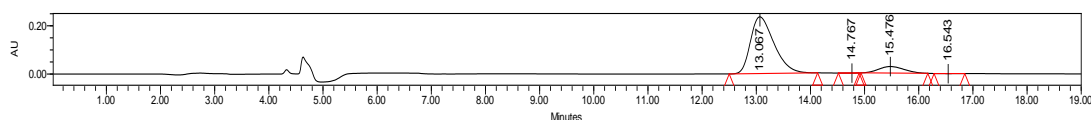

|   | Retention Time | Area    | % Area |
|---|----------------|---------|--------|
| 1 | 13.067         | 7084846 | 88.70  |
| 2 | 14.767         | 4704    | 0.06   |
| 3 | 15.476         | 890046  | 11.14  |



|   |        |      |      |
|---|--------|------|------|
| 4 | 16.543 | 7580 | 0.09 |
|---|--------|------|------|

|   | Retention Time | Area    | % Area |
|---|----------------|---------|--------|
| 1 | 13.067         | 7084846 | 99.89  |
| 2 | 16.543         | 7580    | 0.11   |

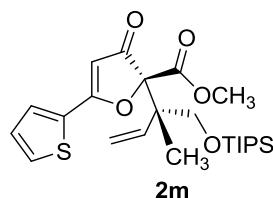

**Methyl-(S)-2-((S)-2-methyl-1-((triisopropylsilyloxy)but-3-en-2-yl)-3-oxo-5-(thiophen-2-yl)-2,3-dihydrofuran-2-carboxylate;**

0.41 mmol scale reaction;

colourless oil; 180 mg, 95% yield, 99%/90% ee, 9:1 dr;  $[\alpha]_D^{25} = -100.1$  (c 0.60,  $\text{CH}_2\text{Cl}_2$ ); Determined by HPLC analysis [Daicel chiralpak Lux 5u Cellulose-2, n-hexane/i-PrOH = 95/5, 0.8 mL/min,  $\lambda = 254$  nm,  $t_1 = 20.12$

min,  $t_2 = 21.36$  min,  $t_3 = 28.55$  min,  $t_4 = 53.03$  min];

**$^1\text{H}$  NMR** (400 MHz,  $\text{CDCl}_3$ )  $\delta$  7.70 (d,  $J = 3.2$  Hz, 1H), 7.66 (d,  $J = 4.8$  Hz, 1H), 7.21 – 7.17 (m, 1H), 6.19 (dd,  $J = 18.0, 10.8$  Hz, 1H), 5.79 (s, 1H), 5.20 (dd,  $J = 14.8, 11.6$  Hz, 2H), 3.85 (d,  $J = 9.6$  Hz, 1H), 3.72 (d,  $J = 9.6$  Hz, 1H), 3.70 (s, 3H), 1.38 (s, 3H), 1.05-0.96 (m, 21H);

**$^{13}\text{C}$  NMR** (101 MHz,  $\text{CDCl}_3$ )  $\delta$  195.3, 138.1, 132.1, 131.4, 130.7, 128.6, 116.1, 100.0, 92.6, 67.7, 52.8, 50.3, 17.9, 15.6, 12.0;

**HRMS** (ESI) calcd for  $[\text{M}+\text{H}]^+$ :  $\text{C}_{24}\text{H}_{37}\text{O}_5\text{SiS}$ , m/z: 465.2131, observed: 465.2129.

*Chiral HPLC spectrum of racemic 2m:*

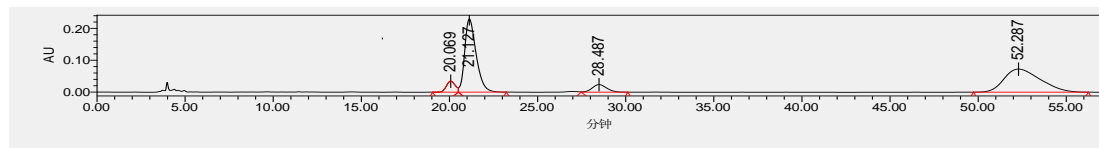

|   | Retention Time | Area     | % Area |
|---|----------------|----------|--------|
| 1 | 20.069         | 1216878  | 5.21   |
| 2 | 21.127         | 10399976 | 44.55  |
| 3 | 28.487         | 1353807  | 5.80   |
| 4 | 52.287         | 10374611 | 44.44  |

*Chiral HPLC spectrum of cat-2m:*

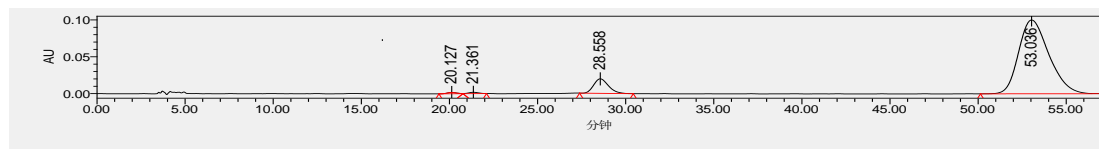

|   | Retention Time | Area     | % Area |
|---|----------------|----------|--------|
| 1 | 20.127         | 67570    | 0.51   |
| 2 | 21.361         | 72069    | 0.54   |
| 3 | 28.558         | 1142231  | 8.63   |
| 4 | 53.036         | 11950112 | 90.31  |

|   | Retention Time | Area     | % Area |
|---|----------------|----------|--------|
| 1 | 21.361         | 72069    | 0.60   |
| 2 | 53.036         | 11950112 | 99.40  |

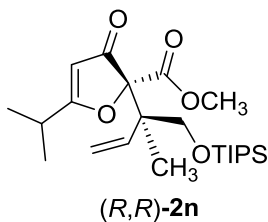

**Methyl-(R)-5-isopropyl-2-((R)-2-methyl-1-((triisopropylsilyl)oxy)but-3-en-2-yl)-3-oxo-2,3-dihydrofuran-2-carboxylate;**

0.1 mmol scale reaction;  
 colourless oil; 40.7 mg, 96% yield, 99%/92% ee, 9:1 dr;  $[\alpha]_D^{25} = 43.6$  (c 0.80, CH<sub>2</sub>Cl<sub>2</sub>); Determined by HPLC analysis [Daicel chiralpak IE, n-hexane/i-PrOH = 99/1, 1.0 mL/min,  $\lambda = 254$  nm,  $t_1 = 39.70$  min,  $t_2 =$

46.73 min,  $t_3 = 52.61$  min];

<sup>1</sup>H NMR (400 MHz, CDCl<sub>3</sub>)  $\delta$  6.12 (dd,  $J = 17.6, 11.2$  Hz, 1H), 5.35 (s, 1H), 5.21 (dd,  $J = 17.6, 12.0$  Hz, 2H), 3.81 – 3.74 (m, 2H), 3.71 (s, 3H), 2.83 – 2.76 (m, 1H), 1.31 (s, 3H), 1.27 (d,  $J = 6.8$  Hz, 6H), 1.06 – 1.03 (m, 21H);

<sup>13</sup>C NMR (101 MHz, CDCl<sub>3</sub>)  $\delta$  197.3, 197.0, 165.1, 138.0, 116.1, 101.7, 92.2, 67.0, 52.8, 49.7, 30.2, 19.4, 19.3, 18.0, 15.4, 12.0;

HRMS (ESI) calcd for [M+H]<sup>+</sup>: C<sub>23</sub>H<sub>41</sub>O<sub>5</sub>Si, m/z: 425.2723, observed: 425.2720.

Chiral HPLC spectrum of racemic **2n** (two peaks overlap):

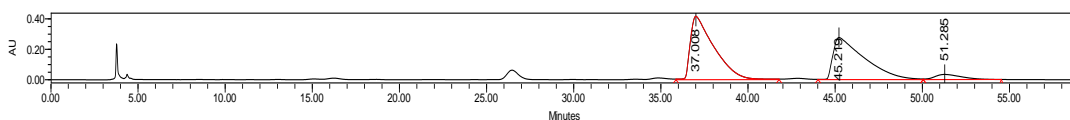

|   | Retention Time | Area     | % Area |
|---|----------------|----------|--------|
| 1 | 37.008         | 39462862 | 50.94  |
| 2 | 45.219         | 34423826 | 44.43  |
| 3 | 51.285         | 3589409  | 4.63   |

Chiral HPLC spectrum of *ent-cat-2n* (*E-1n* as the starting material, for analysis we did the *ent*-catalytic experiments):

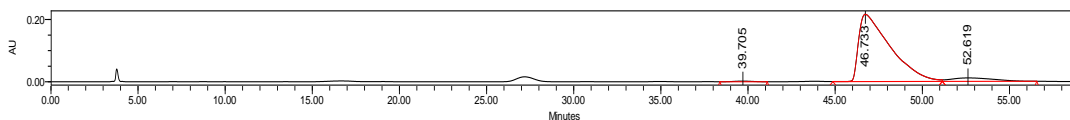

|   | Retention Time | Area     | % Area |
|---|----------------|----------|--------|
| 1 | 39.705         | 148078   | 0.51   |
| 2 | 46.733         | 27186248 | 93.08  |
| 3 | 52.619         | 1871815  | 6.41   |

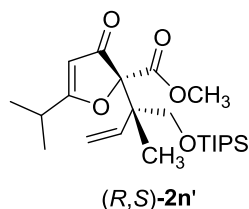

**Methyl-(R)-5-isopropyl-2-((S)-2-methyl-1-((triisopropylsilyl)oxy)but-3-en-2-yl)-3-oxo-2,3-dihydrofuran-2-carboxylate**

0.1 mmol scale reaction;  
 colourless oil; 36.0 mg, 85% yield, 98% ee, 16:1 dr;  $[\alpha]_D^{25} = 94.5$  (c 0.42, CH<sub>2</sub>Cl<sub>2</sub>); Determined by HPLC analysis [Daicel chiralpak IE, n-hexane/i-PrOH = 99/1, 1.0 mL/min,  $\lambda = 254$  nm,  $t_1 = 38.15$  min,  $t_2 = 44.76$

min,  $t_3 = 46.11$  min];

<sup>1</sup>H NMR (400 MHz, CDCl<sub>3</sub>) 5.90 (dd,  $J = 16.8, 11.6$  Hz, 1H), 5.32 (s, 1H), 5.13 (dd,  $J = 17.2, 11.6$  Hz, 1H), 3.88 (d,  $J = 9.2$  Hz, 1H), 3.71 (s, 3H), 3.63 (d,  $J = 9.2$  Hz, 1H), 2.89 – 2.71 (m, 1H), 1.43 (s, 3H), 1.27 (d,  $J = 7.2$  Hz, 6H), 1.06 (s, 21H).

$^{13}\text{C}$  NMR (101 MHz,  $\text{CDCl}_3$ )  $\delta$  197.49, 197.48, 164.97, 137.48, 116.36, 101.67, 92.01, 67.58, 52.65, 49.13, 30.16, 19.45, 19.28, 17.96, 17.93, 15.37, 11.99;

**HRMS** (ESI) calcd for  $[\text{M}+\text{H}]^+$ :  $\text{C}_{23}\text{H}_{41}\text{O}_5\text{Si}$ ,  $m/z$ : 425.2723, observed: 425.2718.

*Chiral HPLC spectrum of ent-cat--2n (Z-1n' as the starting material, for analysis we did the ent-catalytic experiments):*

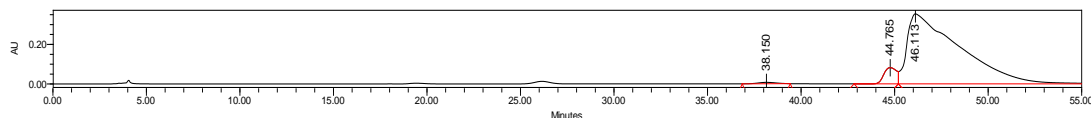

|   | Retention Time | Area     | % Area |
|---|----------------|----------|--------|
| 1 | 38.150         | 485827   | 0.65   |
| 2 | 44.765         | 3835850  | 5.17   |
| 3 | 46.113         | 69928943 | 94.18  |

|   | Retention Time | Area     | % Area |
|---|----------------|----------|--------|
| 1 | 38.150         | 485827   | 0.69   |
| 2 | 46.113         | 69928943 | 99.31  |

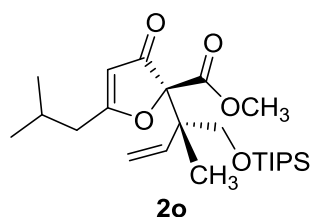

**Methyl-(S)-5-isobutyl-2-((S)-2-methyl-1-((triisopropylsilyloxy)but-3-en-2-yl)-3-oxo-2,3-dihydrofuran-2-carboxylate;**

0.1 mmol scale reaction;

colourless oil; 41.5 mg, 95% yield, 99%/97% ee, 8:1 dr;  $[\alpha]_{\text{D}}^{25} = -11.6$  (c 0.44,  $\text{CH}_2\text{Cl}_2$ ); Determined by HPLC analysis [Daicel chiralpak IE, n-hexane/*i*-PrOH = 99/1, 1.0 mL/min,  $\lambda = 254$  nm,  $t_1 = 27.37$  min,  $t_2 =$

$29.24$  min,  $t_3 = 36.73$  min,  $t_4 = 41.78$  min];

$^1\text{H}$  NMR (400 MHz,  $\text{CDCl}_3$ )  $\delta$  6.11 (dd,  $J = 17.2, 11.8$  Hz, 1H), , 5.36 (s, 1H), 5.18 (dd,  $J = 20.0, 11.6$  Hz, 2H), 3.88 – 3.72 (m, 2H), 3.71 – 3.62 (m, 3H), 2.42 (d,  $J = 7.2$  Hz, 2H), 2.18 – 2.02 (m, 1H), 1.32 (s, 3H), 1.16 – 0.71 (m, 27H);

$^{13}\text{C}$  NMR (101 MHz,  $\text{CDCl}_3$ )  $\delta$  197.0, 192.0, 165.1, 138.0, 116.1, 104.7, 67.0, 52.7, 49.7, 39.7, 26.6, 22.6, 22.4, 18.0, 15.4, 12.0;

**HRMS** (ESI) calcd for  $[\text{M}+\text{H}]^+$ :  $\text{C}_{24}\text{H}_{43}\text{O}_5\text{Si}$ ,  $m/z$ : 439.2880, observed: 439.2885.

*Chiral HPLC spectrum of racemic 2o:*

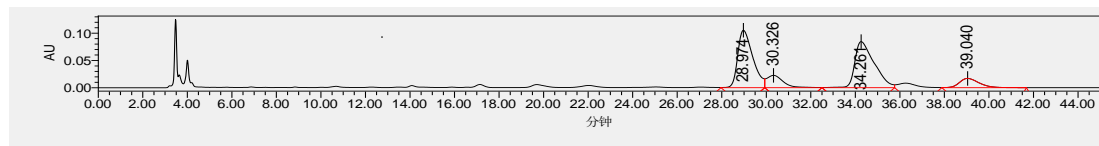

|   | Retention Time | Area    | % Area |
|---|----------------|---------|--------|
| 1 | 28.974         | 4934627 | 40.43  |
| 2 | 30.326         | 1148279 | 9.41   |
| 3 | 34.261         | 5087732 | 41.68  |
| 4 | 39.040         | 1035279 | 8.48   |

*Chiral HPLC spectrum of cat-2o:*

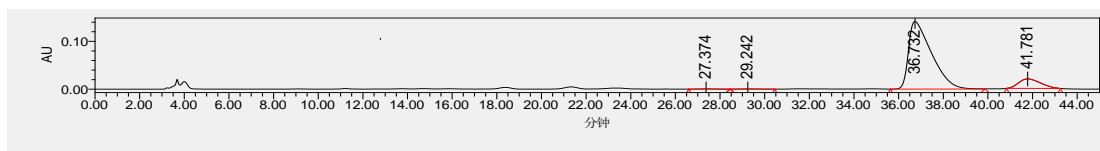

|   | Retention Time | Area     | % Area |
|---|----------------|----------|--------|
| 1 | 27.374         | 19765    | 0.17   |
| 2 | 29.242         | 22802    | 0.20   |
| 3 | 36.732         | 10099281 | 87.82  |
| 4 | 41.781         | 1358017  | 11.81  |

|   | Retention Time | Area     | % Area |
|---|----------------|----------|--------|
| 1 | 27.374         | 19765    | 0.20   |
| 2 | 36.732         | 10099281 | 99.80  |

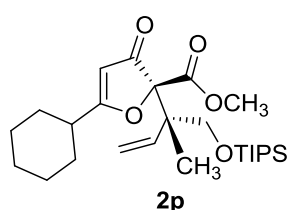

**Methyl-(S)-5-cyclohexyl-2-((S)-2-methyl-1-((triisopropylsilyl)oxy)but-3-en-2-yl)-3-oxo-2,3-dihydrofuran-2-carboxylate;**

0.1 mmol scale reaction;  
 colourless oil; 43.6 mg, 94% yield, 98%/90% ee, 9:1 dr;  $[\alpha]_D^{25} = -23.8$  (c 0.75,  $\text{CH}_2\text{Cl}_2$ ); Determined by HPLC analysis [Daicel chiralpak IE, n-hexane/i-PrOH = 99/1, 1.0 mL/min,  $\lambda = 254$  nm,  $t_1 = 46.95$  min,  $t_2 =$

54.46 min,  $t_3 = 64.77$  min];

**$^1\text{H}$  NMR** (400 MHz,  $\text{CDCl}_3$ )  $\delta$  6.10 (dd,  $J = 17.6, 10.8$  Hz, 1H), 5.31 – 5.08 (m, 3H), 3.83 – 3.73 (m, 2H), 3.71 (s, 3H), 2.52 – 2.48 (m, 1H), 2.00 (s, 2H), 1.83 (d,  $J = 11.6$  Hz, 2H), 1.71 (d,  $J = 12.4$  Hz, 1H), 1.47 – 1.25 (m, 8H), 1.04 (s, 21H);

**$^{13}\text{C}$  NMR** (101 MHz,  $\text{CDCl}_3$ )  $\delta$  197.1, 196.3, 165.2, 138.0, 116.1, 101.9, 92.0, 67.0, 52.8, 49.7, 39.4, 29.8, 29.5, 25.7, 25.5, 18.0, 15.4, 12.0;

**HRMS** (ESI) calcd for  $[\text{M}+\text{H}]^+$ :  $\text{C}_{26}\text{H}_{45}\text{O}_5\text{Si}$ , m/z: 465.3036, observed: 465.3034.

*Chiral HPLC spectrum of racemic 2p* (two peaks overlap):

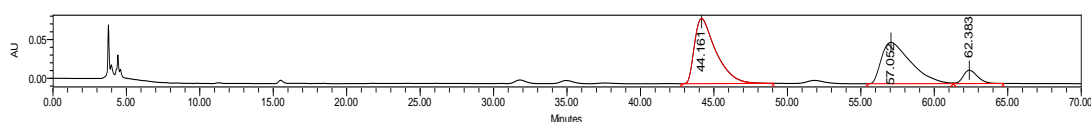

|   | Retention Time | Area    | % Area |
|---|----------------|---------|--------|
| 1 | 44.161         | 8479473 | 49.81  |
| 2 | 57.052         | 7374754 | 43.32  |
| 3 | 62.383         | 1170194 | 6.87   |

*Chiral HPLC spectrum of cat-2p:*

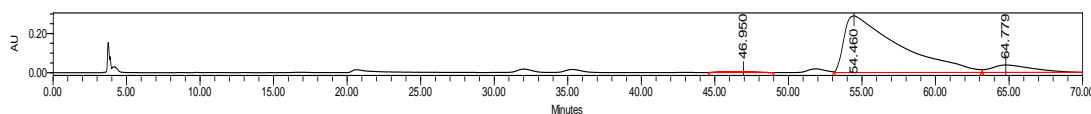

|   | Retention Time | Area   | % Area |
|---|----------------|--------|--------|
| 1 | 46.950         | 742714 | 0.90   |

|   |        |          |       |
|---|--------|----------|-------|
| 2 | 54.460 | 74862354 | 90.27 |
| 3 | 64.779 | 7329094  | 8.84  |

|   | Retention Time | Area     | % Area |
|---|----------------|----------|--------|
| 1 | 46.950         | 742714   | 0.98   |
| 2 | 54.460         | 74862354 | 99.02  |

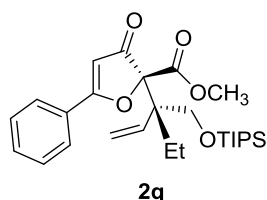

**Methyl-(S)-3-oxo-5-phenyl-2-((S)-3-(((triisopropylsilyl)oxy)methyl)pent-1-en-3-yl)-2,3-dihydrofuran-2-carboxylate;**

0.1 mmol scale reaction;

colourless oil; 40 mg, 85% yield, 99% ee, 13:1 dr;  $[\alpha]_D^{25} = -263.5$  (c 0.15,  $\text{CH}_2\text{Cl}_2$ ); Determined by HPLC analysis [Daicel chiralpak IE, n-hexane/i-PrOH = 95/5, 1.0 mL/min,  $\lambda = 254$  nm,  $t_1 = 18.60$  min,  $t_2 = 21.96$  min,  $t_3 = 23.82$  min,  $t_4 = 28.66$  min];

$^1\text{H NMR}$  (400 MHz,  $\text{CDCl}_3$ )  $\delta$  7.91 – 7.80 (m, 2H), 7.64 – 7.53 (m, 1H), 7.53 – 7.45 (m, 2H), 6.06 (dd,  $J = 17.6, 11.2$  Hz, 1H), 5.95 (s, 1H), 5.27 (d,  $J = 11.2$  Hz, 1H), 5.15 (d,  $J = 17.6$ , 1H), 4.12 (d,  $J = 10.0$  Hz, 1H), 3.97 (d,  $J = 10.0$  Hz, 1H), 3.70 (s, 3H), 2.07 – 1.95 (m, 1H), 1.92 – 1.81 (m, 1H), 1.11 – 1.02 (m, 21H), 0.83 (t,  $J = 7.6$  Hz, 3H);

$^{13}\text{C NMR}$  (101 MHz,  $\text{CDCl}_3$ )  $\delta$  196.9, 184.4, 165.3, 135.8, 132.8, 128.9, 128.6, 127.2, 116.2, 101.4, 93.0, 63.2, 53.0, 52.7, 21.9, 18.0, 12.2, 8.2;

**HRMS** (ESI) calcd for  $[\text{M}+\text{H}]^+$ :  $\text{C}_{27}\text{H}_{41}\text{O}_5\text{Si}$ ,  $m/z$ : 473.2723, observed: 473.2723.

*Chiral HPLC spectrum of racemic 2q:*

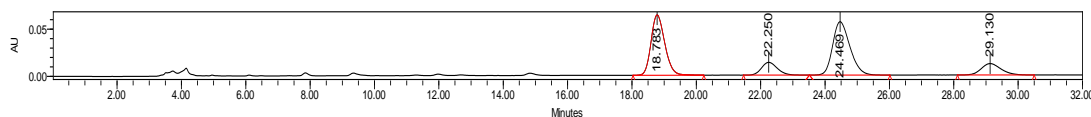

|   | Retention Time | Area    | % Area |
|---|----------------|---------|--------|
| 1 | 18.783         | 1888263 | 38.02  |
| 2 | 22.250         | 463104  | 9.32   |
| 3 | 24.469         | 2101779 | 42.32  |
| 4 | 29.130         | 513154  | 10.33  |

*Chiral HPLC spectrum of cat-2q:*

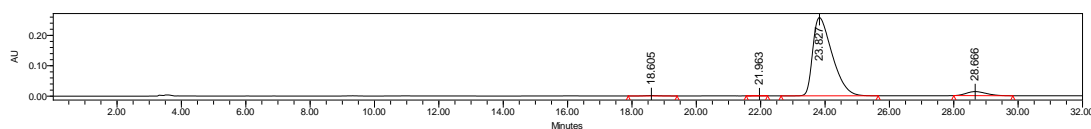

|   | Retention Time | Area     | % Area |
|---|----------------|----------|--------|
| 1 | 18.605         | 37354    | 0.33   |
| 2 | 21.963         | 8416     | 0.07   |
| 3 | 23.827         | 10770467 | 94.49  |
| 4 | 28.666         | 582612   | 5.11   |

|  | Retention Time | Area | % Area |
|--|----------------|------|--------|
|--|----------------|------|--------|

|   |        |          |       |
|---|--------|----------|-------|
| 1 | 18.605 | 37354    | 0.35  |
| 2 | 23.827 | 10770467 | 99.65 |

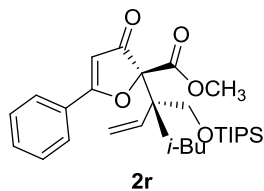

**Methyl-(S)-3-oxo-5-phenyl-2-((S)-3-(((triisopropylsilyl)oxy)methyl)hept-1-en-3-yl)-2,3-dihydrofuran-2-carboxylate;**

0.1 mmol scale reaction;  
 colourless oil; 42 mg, 84% yield, 98%/99% ee, 5:1 dr;  $[\alpha]_D^{25} = -140.0$  (c 0.20, CH<sub>2</sub>Cl<sub>2</sub>); Determined by HPLC analysis [Daicel chiralpak IE, n-hexane/i-PrOH = 95/5, 1.0 mL/min,  $\lambda = 254$  nm,  $t_1 = 14.91$  min,  $t_2 = 16.57$

min,  $t_3 = 20.88$  min,  $t_4 = 22.94$  min];

**<sup>1</sup>H NMR** (400 MHz, CDCl<sub>3</sub>)  $\delta$  7.83 – 7.77 (m, 2H), 7.55 – 7.49 (m, 1H), 7.48 – 7.41 (m, 2H), 6.23 (dd,  $J = 18.0, 11.2$  Hz, 1H), 5.89 (s, 1H), 5.21 (d,  $J = 11.2$  Hz, 1H), 5.13 (d,  $J = 18.0$  Hz, 1H), 4.06 (dd,  $J = 26.0, 10.0$  Hz, 2H), 3.61 (s, 3H), 1.65 – 1.58 (m, 1H), 1.55 – 1.52 (m, 2H), 1.03 (dd,  $J = 6.4, 2.5$  Hz, 21H), 0.80 – 0.76 (m, 6H);

**<sup>13</sup>C NMR** (101 MHz, CDCl<sub>3</sub>)  $\delta$  196.1, 183.7, 164.0, 135.4, 131.8, 127.9, 127.5, 126.2, 114.3, 100.4, 92.1, 63.5, 52.4, 51.6, 37.9, 28.7, 22.7, 17.1, 11.2;

**HRMS** (ESI) calcd for  $[M+H]^+$ : C<sub>29</sub>H<sub>45</sub>O<sub>5</sub>Si, m/z: 501.3036, observed: 501.3032.

*Chiral HPLC spectrum of racemic 2r:*

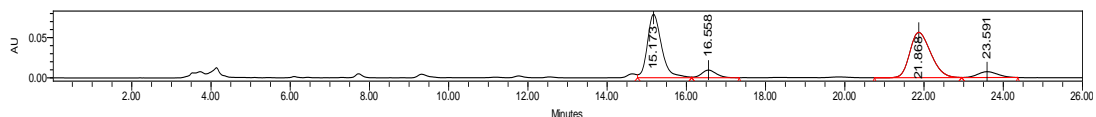

|   | Retention Time | Area    | % Area |
|---|----------------|---------|--------|
| 1 | 15.173         | 1955054 | 43.20  |
| 2 | 16.558         | 241884  | 5.34   |
| 3 | 21.868         | 2067695 | 45.69  |
| 4 | 23.591         | 261341  | 5.77   |

*Chiral HPLC spectrum of cat-2r:*

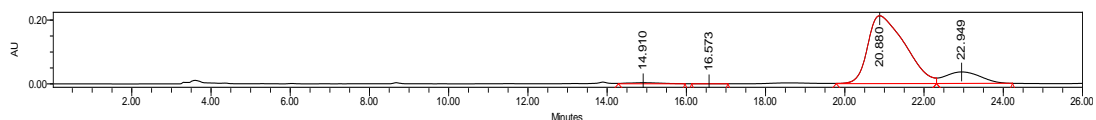

|   | Retention Time | Area     | % Area |
|---|----------------|----------|--------|
| 1 | 14.910         | 155684   | 0.97   |
| 2 | 16.573         | 1948     | 0.01   |
| 3 | 20.880         | 13689746 | 85.43  |
| 4 | 22.949         | 2176215  | 13.58  |

|   | Retention Time | Area     | % Area |
|---|----------------|----------|--------|
| 1 | 14.911         | 127671   | 0.92   |
| 2 | 20.880         | 13689746 | 99.08  |

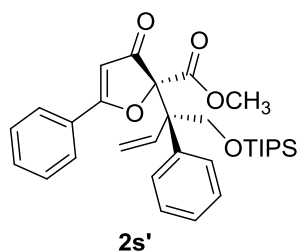

**Methyl-(*R*)-3-oxo-5-phenyl-2-((*R*)-2-phenyl-1-((triisopropylsilyl)oxy)but-3-en-2-yl)-2,3-dihydrofuran-2-carboxylate;**

0.086 mmol scale reaction;  
 colourless oil; 40 mg, 88% yield, 83% ee, 19:1 dr;  $[\alpha]_D^{25} = 103.4$  (c 0.35,  $\text{CH}_2\text{Cl}_2$ ); Determined by HPLC analysis [Daicel chiralpak IC, n-hexane/*i*-PrOH = 95/5, 1.0 mL/min,  $\lambda = 254$  nm,  $t_1 = 10.85$  min,  $t_2 = 14.31$  min];

$^1\text{H NMR}$  (400 MHz,  $\text{CDCl}_3$ )  $\delta$  7.72 (d,  $J = 7.6$  Hz, 2H), 7.54 (t,  $J = 7.2$  Hz, 1H), 7.45 (t,  $J = 8.0$  Hz, 4H), 7.20-7.10 (m, 3H), 6.87 (dd,  $J = 18.0, 11.2$  Hz, 1H), 5.78 (s, 1H), 5.45 (d,  $J = 11.6$  Hz, 1H), 5.39 (d,  $J = 18.0$  Hz, 1H), 4.69 (d,  $J = 10.0$  Hz, 1H), 4.54 (d,  $J = 10.0$  Hz, 1H), 3.65 (s, 3H), 1.0-0.96 (m, 21H);

$^{13}\text{C NMR}$  (101 MHz,  $\text{CDCl}_3$ )  $\delta$  196.1, 184.1, 165.4, 137.9, 137.7, 132.8, 129.3, 128.8, 128.2, 127.4, 127.1, 127.0, 116.9, 101.3, 92.8, 64.5, 58.2, 53.0, 18.0, 12.1;

**HRMS** (ESI) calcd for  $[\text{M}+\text{H}]^+$ :  $\text{C}_{31}\text{H}_{41}\text{O}_5\text{Si}$ ,  $m/z$ : 521.2723, observed: 521.2723.

*Chiral HPLC spectrum of racemic 2s'*:

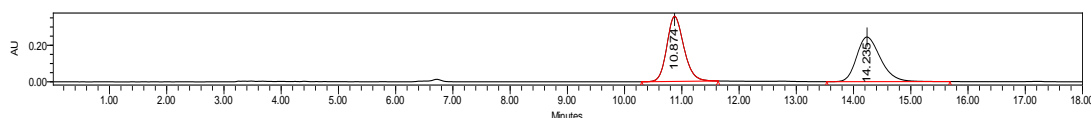

|   | Retention Time | Area    | % Area |
|---|----------------|---------|--------|
| 1 | 10.874         | 7344776 | 50.99  |
| 2 | 14.235         | 7058208 | 49.01  |

*Chiral HPLC spectrum of cat-2s'*:

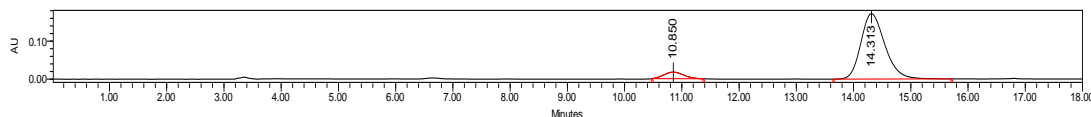

|   | Retention Time | Area    | % Area |
|---|----------------|---------|--------|
| 1 | 10.850         | 465328  | 8.46   |
| 2 | 14.313         | 5036542 | 91.54  |

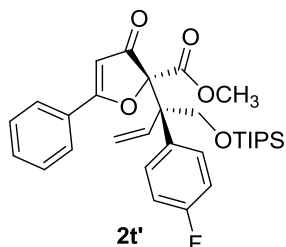

**Methyl-(*R*)-2-((*R*)-2-(4-fluorophenyl)-1-((triisopropylsilyl)oxy)but-3-en-2-yl)-3-oxo-5-phenyl-2,3-dihydrofuran-2-carboxylate**

0.175 mmol scale reaction;  
 colourless oil; 88 mg, 94% yield, 91% ee, 15:1 dr;  $[\alpha]_D^{25} = 118.4$  (c 0.38,  $\text{CH}_2\text{Cl}_2$ ); Determined by HPLC analysis [Daicel chiralpak IE, n-hexane/*i*-PrOH = 95/5, 1.0 mL/min,  $\lambda = 254$  nm,  $t_1 = 10.28$  min,  $t_2 = 11.87$  min,  $t_3 = 13.31$  min,  $t_4 = 17.88$  min];

$^1\text{H NMR}$  (400 MHz,  $\text{CDCl}_3$ )  $\delta$  7.71 (d,  $J = 7.2$  Hz, 2H), 7.55 (t,  $J = 7.2$  Hz, 1H), 7.49 – 7.39 (m, 4H), 6.84 (t,  $J = 8.8$  Hz, 2H), 6.77 (dd,  $J = 18.0, 11.2$  Hz, 1H), 5.76 (s, 1H), 5.50 (d,  $J = 11.6$  Hz, 1H), 5.41 (d,  $J = 18.0$  Hz, 1H), 4.78 (d,  $J = 10.0$  Hz, 1H), 4.52 (d,  $J = 10.0$  Hz, 1H), 3.68 (s, 3H), 1.02 – 0.92 (m, 21H);

$^{13}\text{C}$  NMR (101 MHz,  $\text{CDCl}_3$ )  $\delta$  196.12, 184.35, 165.25, 161.7 (d,  $J = 244$  Hz), 137.75, 133.30 (d,  $J = 3.0$  Hz), 133.00, 131.22 (d,  $J = 8$  Hz), 128.90, 128.03, 127.07, 117.03, 114.0 (d,  $J = 21$  Hz), 101.2, 92.59, 63.92, 57.61, 53.10, 17.98, 12.08;

**HRMS** (ESI) calcd for  $[\text{M}+\text{Na}]^+$ :  $\text{C}_{31}\text{H}_{39}\text{O}_5\text{SiFNa}$ ,  $m/z$ : 561.2448, observed: 561.2145.

Chiral HPLC spectrum of racemic **2t'**:

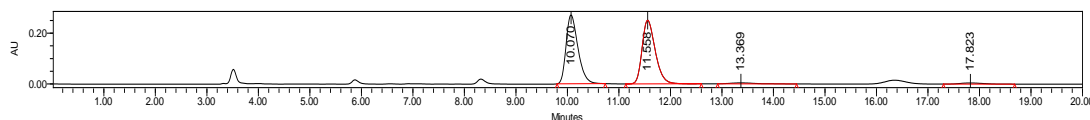

|   | Retention Time | Area    | % Area |
|---|----------------|---------|--------|
| 1 | 10.070         | 4338167 | 47.99  |
| 2 | 11.558         | 4434222 | 49.05  |
| 3 | 13.369         | 130100  | 1.44   |
| 4 | 17.823         | 137668  | 1.52   |

Chiral HPLC spectrum of *cat*-**2t'**:

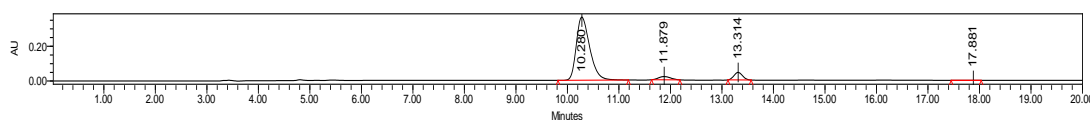

|   | Retention Time | Area    | % Area |
|---|----------------|---------|--------|
| 1 | 10.280         | 6570702 | 89.04  |
| 2 | 11.879         | 303755  | 4.12   |
| 3 | 13.314         | 504245  | 6.83   |
| 4 | 17.881         | 649     | 0.01   |

|   | Retention Time | Area    | % Area |
|---|----------------|---------|--------|
| 1 | 10.280         | 6570702 | 95.58  |
| 2 | 11.879         | 303755  | 4.42   |

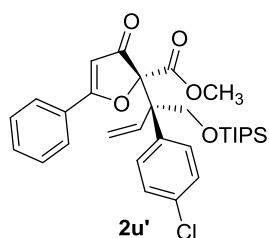

**Methyl-(*R*)-2-((*R*)-2-(4-chlorophenyl)-1-((triisopropylsilyloxy)but-3-en-2-yl)-3-oxo-5-phenyl-2,3-dihydrofuran-2-carboxylate**

0.11 mmol scale reaction;

colourless oil; 57 mg, 94% yield, 93% ee, 15:1 dr;  $[\alpha]_{\text{D}}^{25} = 96.9$  (c 0.43,  $\text{CH}_2\text{Cl}_2$ ); Determined by HPLC analysis [Daicel chiralpak IE, *n*-hexane/*i*-PrOH = 95/5, 1.0 mL/min,  $\lambda = 254$  nm,  $t_1 = 8.83$  min,  $t_2 = 9.79$  min,  $t_3 = 11.72$  min,  $t_4 = 12.60$  min];

$^1\text{H}$  NMR (400 MHz,  $\text{CDCl}_3$ )  $\delta$  7.73 – 7.68 (m, 2H), 7.56 (t,  $J = 7.6$  Hz, 1H), 7.47 (t,  $J = 7.6$  Hz, 2H), 7.40 (d,  $J = 8.8$  Hz, 2H), 7.14 (d,  $J = 8.4$  Hz, 2H), 6.77 (dd,  $J = 18.0, 11.2$  Hz, 1H), 5.78 (s, 1H), 5.51 (d,  $J = 11.2$  Hz, 1H), 5.38 (d,  $J = 18.0$  Hz, 1H), 4.74 (d,  $J = 10.0$  Hz, 1H), 4.49 (d,  $J = 10.0$  Hz, 1H), 3.68 (s, 3H), 1.00 – 0.91 (m, 21H);

$^{13}\text{C}$  NMR (101 MHz,  $\text{CDCl}_3$ )  $\delta$  196.0, 184.4, 165.2, 137.4, 136.3, 133.0, 132.9, 131.0, 128.9, 128.0, 127.4, 127.1, 117.3, 101.2, 92.4, 63.9, 57.7, 53.1, 18.0, 12.1;

**HRMS** (ESI) calcd for  $[\text{M}+\text{H}]^+$ :  $\text{C}_{31}\text{H}_{40}\text{O}_5\text{SiCl}$ ,  $m/z$ : 555.2334, observed: 555.2329.

Chiral HPLC spectrum of racemic **2u'**:



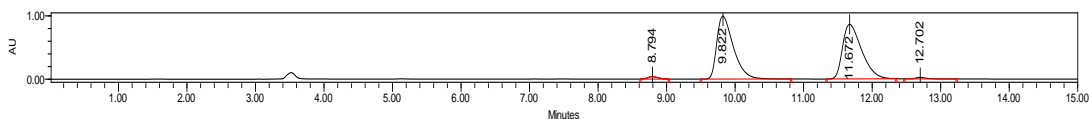

|   | Retention Time | Area     | % Area |
|---|----------------|----------|--------|
| 1 | 8.794          | 393809   | 1.16   |
| 2 | 9.822          | 16732109 | 49.11  |
| 3 | 11.672         | 16716039 | 49.06  |
| 4 | 12.702         | 230871   | 0.68   |

Chiral HPLC spectrum of **cat-2u'**:

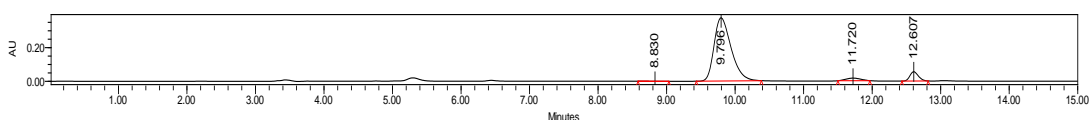

|   | Retention Time | Area    | % Area |
|---|----------------|---------|--------|
| 1 | 8.830          | 274     | 0.00   |
| 2 | 9.796          | 6489183 | 90.23  |
| 3 | 11.720         | 226096  | 3.14   |
| 4 | 12.607         | 476436  | 6.62   |

|   | Retention Time | Area    | % Area |
|---|----------------|---------|--------|
| 1 | 9.796          | 6489183 | 96.63  |
| 2 | 11.720         | 226096  | 3.37   |

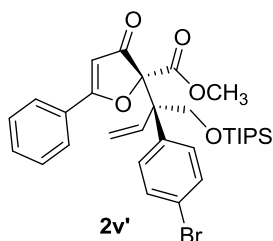

**Methyl-(R)-2-((R)-2-(4-bromophenyl)-1-((triisopropylsilyloxy)but-3-en-2-yl)-3-oxo-5-phenyl-2,3-dihydrofuran-2-carboxylate**

0.082 mmol scale reaction;  
 colourless oil; 45 mg, 92% yield, 91% ee, 15:1 dr;  $[\alpha]_D^{25} = 98.4$  (c 0.44,  $\text{CH}_2\text{Cl}_2$ ); Determined by HPLC analysis [Daicel chiralpak IE, n-hexane/i-PrOH = 95/5, 1.0 mL/min,  $\lambda = 254$  nm,  $t_1 = 9.45$  min,  $t_2 = 9.96$  min,  $t_3 = 11.98$  min,  $t_4 = 12.74$  min];

$^1\text{H NMR}$  (400 MHz,  $\text{CDCl}_3$ )  $\delta$  7.71 (d,  $J = 8.4$  Hz, 2H), 7.56 (t,  $J = 6.8$  Hz, 1H), 7.47 (t,  $J = 7.6$  Hz, 2H), 7.34-7.26 (m, 5H), 6.77 (dd,  $J = 18.0, 11.2$  Hz, 1H), 5.78 (s, 1H), 5.50 (d,  $J = 11.2$  Hz, 1H), 5.37 (d,  $J = 18.0$  Hz, 1H), 4.71 (d,  $J = 10.0$  Hz, 1H), 4.47 (d,  $J = 10.0$  Hz, 1H), 3.68 (s, 3H), 1.00-0.91 (m, 21H);

$^{13}\text{C NMR}$  (101 MHz,  $\text{CDCl}_3$ )  $\delta$  195.9, 184.4, 165.2, 137.3, 136.9, 133.1, 131.3, 130.4, 128.9, 128.0, 127.1, 121.2, 117.3, 101.2, 92.4, 64.0, 57.8, 53.2 18.0, 12.1;

**HRMS** (ESI) calcd for  $[\text{M}+\text{H}]^+$ :  $\text{C}_{31}\text{H}_{40}\text{O}_5\text{SiBr}$ ,  $m/z$ : 599.1828, 601.1808, observed: 599.1832, 601.1818.

Chiral HPLC spectrum of racemic **2v'**:

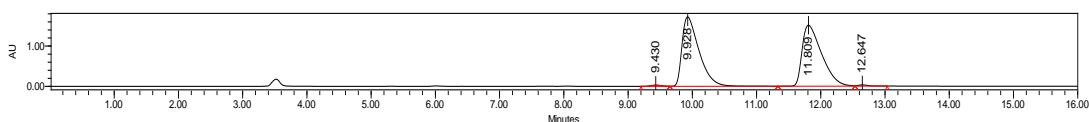

|   | Retention Time | Area     | % Area |
|---|----------------|----------|--------|
| 1 | 9.430          | 328160   | 0.51   |
| 2 | 9.928          | 31750300 | 49.39  |
| 3 | 11.809         | 31899049 | 49.62  |
| 4 | 12.647         | 302893   | 0.47   |

Chiral HPLC spectrum of **cat-2w'**:

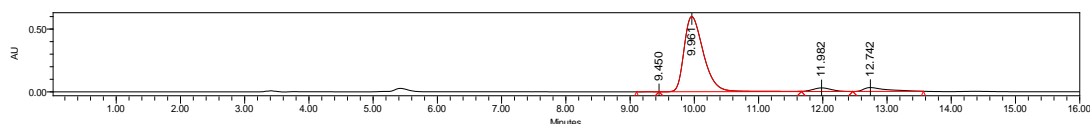

|   | Retention Time | Area     | % Area |
|---|----------------|----------|--------|
| 1 | 9.450          | 1570     | 0.01   |
| 2 | 9.961          | 12485592 | 90.39  |
| 3 | 11.982         | 565323   | 4.09   |
| 4 | 12.742         | 760583   | 5.51   |

|   | Retention Time | Area     | % Area |
|---|----------------|----------|--------|
| 1 | 9.961          | 12485592 | 95.67  |
| 2 | 11.982         | 565323   | 4.33   |

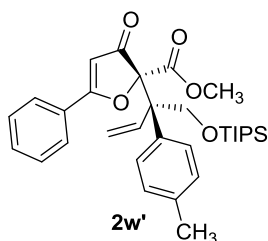

**Methyl-(*R*)-3-oxo-5-phenyl-2-((*R*)-2-(*p*-tolyl)-1-((triisopropylsilyloxy)but-3-en-2-yl)-2,3-dihydrofuran-2-carboxylate**

0.1 mmol scale reaction;  
 colourless oil; 42.7 mg, 80% yield, 62% ee, 15:1 dr;  $[\alpha]_D^{25} = 55.5$  (c 0.42,  $\text{CH}_2\text{Cl}_2$ ); Determined by HPLC analysis [Daicel chiralpak IA, *n*-hexane/*i*-PrOH = 97/3, 1.0 mL/min,  $\lambda = 254$  nm,  $t_1 = 7.76$  min,  $t_2 = 8.36$  min,  $t_3 = 9.32$  min,  $t_4 = 9.99$  min];

$^1\text{H NMR}$  (400 MHz,  $\text{CDCl}_3$ )  $\delta$  7.77 – 7.73 (m, 2H), 7.57 – 7.52 (m, 1H), 7.50 – 7.44 (m, 2H), 7.37 – 7.33 (m, 2H), 7.01 (d,  $J = 8.4$  Hz, 2H), 6.94 (dd,  $J = 17.6, 11.2$  Hz, 1H), 5.81 (s, 1H), 5.49 (d,  $J = 11.2$  Hz, 1H), 5.34 (d,  $J = 18.0$  Hz, 1H), 4.50 (s, 2H), 3.64 (s, 3H), 2.25 (s, 3H), 0.96 – 0.90 (m, 21H).

$^{13}\text{C NMR}$  (101 MHz,  $\text{CDCl}_3$ )  $\delta$  196.0, 183.9, 165.5, 137.6, 136.5, 135.1, 132.7, 129.1, 128.8, 128.4, 128.2, 127.1, 116.7, 101.3, 92.8, 65.3, 58.0, 53.0, 21.0, 18.0, 12.1;

**HRMS** (ESI) calcd for  $[\text{M}+\text{H}]^+$ :  $\text{C}_{32}\text{H}_{43}\text{O}_5\text{Si}$ ,  $m/z$ : 535.2880, observed: 535.2881.

Chiral HPLC spectrum of racemic **2w'**:

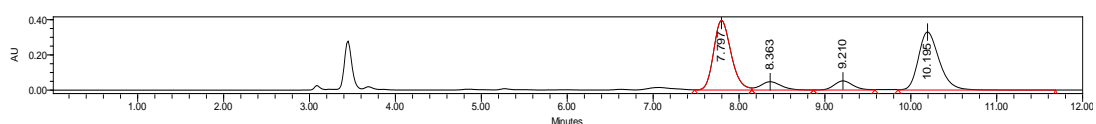

|   | Retention Time | Area    | % Area |
|---|----------------|---------|--------|
| 1 | 7.797          | 5582742 | 43.81  |
| 2 | 8.363          | 804876  | 6.32   |
| 3 | 9.210          | 806979  | 6.33   |
| 4 | 10.195         | 5548133 | 43.54  |

Chiral HPLC spectrum of cat-**2w**<sup>1</sup>:

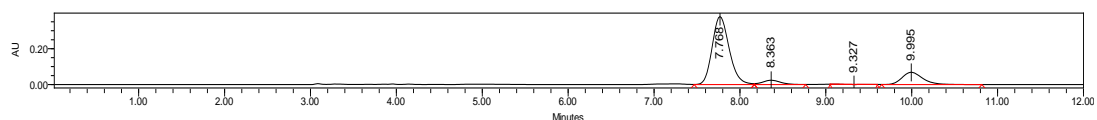

|   | Retention Time | Area    | % Area |
|---|----------------|---------|--------|
| 1 | 7.768          | 5222662 | 77.31  |
| 2 | 8.363          | 363715  | 5.38   |
| 3 | 9.327          | 13037   | 0.19   |
| 4 | 9.995          | 1156450 | 17.12  |

|   | Retention Time | Area    | % Area |
|---|----------------|---------|--------|
| 1 | 7.768          | 5222662 | 81.87  |
| 2 | 9.995          | 1156450 | 18.13  |

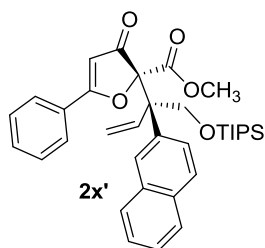

**Methyl-(R)-2-((R)-2-(naphthalen-2-yl)-1-((triisopropylsilyloxy)but-3-en-2-yl)-3-oxo-5-phenyl-2,3-dihydrofuran-2-carboxylate**

0.167 mmol scale reaction;

colourless oil; 76 mg, 80% yield, 83%/98% ee, 8:1 dr;  $[\alpha]_D^{25} = 75.2$  (c 0.38,  $\text{CH}_2\text{Cl}_2$ ); Determined by HPLC analysis [Daicel chiralpak IE, n-hexane/*i*-PrOH = 90/10, 1.0 mL/min,  $\lambda = 254$  nm,  $t_1 = 9.94$  min,  $t_2 = 11.32$  min,  $t_3 = 13.42$  min,  $t_4 = 16.98$  min];

<sup>1</sup>H NMR (400 MHz,  $\text{CDCl}_3$ )  $\delta$  7.92 (s, 1H), 7.74 – 7.66 (m, 4H), 7.64 – 7.62 (m, 2H), 7.54 – 7.47 (m, 1H), 7.45 – 7.36 (m, 4H), 6.96 (dd,  $J = 18.0, 11.6$  Hz, 1H), 5.74 (s, 1H), 5.56 (d,  $J = 11.6$  Hz, 1H), 5.41 (d,  $J = 17.6$  Hz, 1H), 4.80 (d,  $J = 10.0$  Hz, 1H), 4.59 (d,  $J = 10.0$  Hz, 1H), 3.65 (s, 3H), 1.01 – 0.92 (m, 21H);

<sup>13</sup>C NMR (101 MHz,  $\text{CDCl}_3$ )  $\delta$  196.0, 184.2, 165.4, 137.7, 135.4, 132.8, 132.3, 129.1, 128.8, 128.2, 127.2, 127.1, 126.6, 125.8, 125.5, 117.2, 101.3, 92.7, 64.5, 58.4, 53.1, 18.0, 12.1;

HRMS (ESI) calcd for  $[\text{M}+\text{H}]^+$ :  $\text{C}_{35}\text{H}_{43}\text{O}_5\text{Si}$ ,  $m/z$ : 571.2880, observed: 571.2885.

Chiral HPLC spectrum of racemic **2x**<sup>1</sup>:

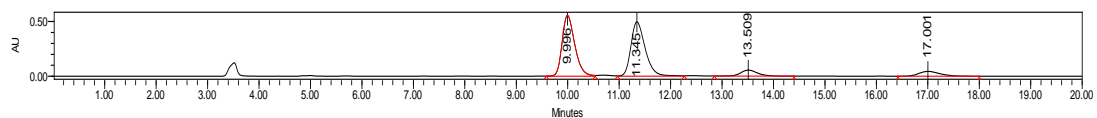

|   | Retention Time | Area    | % Area |
|---|----------------|---------|--------|
| 1 | 9.996          | 9498852 | 43.90  |
| 2 | 11.345         | 9604468 | 44.39  |
| 3 | 13.509         | 1287077 | 5.95   |
| 4 | 17.001         | 1246177 | 5.76   |

Chiral HPLC spectrum of cat-**2x**<sup>1</sup>:

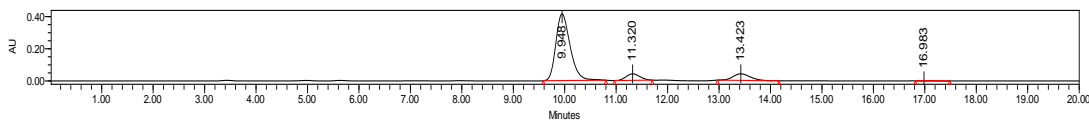

|   | Retention Time | Area    | % Area |
|---|----------------|---------|--------|
| 1 | 9.948          | 8002611 | 82.33  |
| 2 | 11.320         | 750181  | 7.72   |
| 3 | 13.423         | 958213  | 9.86   |
| 4 | 16.983         | 9070    | 0.09   |

|   | Retention Time | Area    | % Area |
|---|----------------|---------|--------|
| 1 | 9.948          | 8002611 | 91.43  |
| 2 | 11.320         | 750181  | 8.57   |

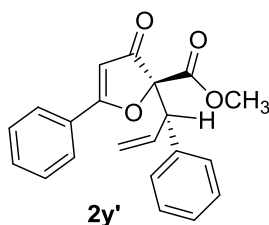

**Methyl-(S)-3-oxo-5-phenyl-2-((S)-1-phenylallyl)-2,3-dihydrofuran-2-carboxylate**

0.1 mmol scale reaction;

White Solid; 32.3 mg, 97% yield, 95% ee, 12:1 dr;  $[\alpha]_D^{25} = -166.4$  (c 0.86,  $\text{CH}_2\text{Cl}_2$ ); Determined by HPLC analysis [Daicel chiralpak IA, n-hexane/*i*-PrOH = 93/7, 1.0 mL/min,  $\lambda = 254$  nm,  $t_1 = 10.75$  min,  $t_2 = 11.64$  min,  $t_3 = 12.65$  min,  $t_4 = 14.01$  min];

**$^1\text{H}$  NMR** (400 MHz,  $\text{CDCl}_3$ ) 7.79 (d,  $J = 7.4$  Hz, 2H), 7.57 (t,  $J = 7.2$  Hz, 1H), 7.48 (t,  $J = 7.6$  Hz, 2H), 7.27 – 7.16 (m, 2H), 7.16 – 7.01 (m, 3H), 6.37 – 6.28 (m, 1H), 5.62 (s, 1H), 5.41 (d,  $J = 17.2$  Hz, 1H), 5.30 (d,  $J = 10.4$  Hz, 1H), 4.54 (d,  $J = 8.4$  Hz, 1H), 3.82 (s, 3H);

**$^{13}\text{C}$  NMR** (101 MHz,  $\text{CDCl}_3$ )  $\delta$  196.2, 186.0, 165.1, 135.5, 134.7, 133.2, 129.2, 129.0, 128.3, 128.0, 127.6, 127.3, 118.7, 100.4, 94.5, 53.8, 53.4;

**HRMS** (ESI) calcd for  $[\text{M}+\text{H}]^+$ :  $\text{C}_{21}\text{H}_{19}\text{O}_4$ ,  $m/z$ : 335.1278, observed: 335.1278.

*Chiral HPLC spectrum of racemic 2y'*:

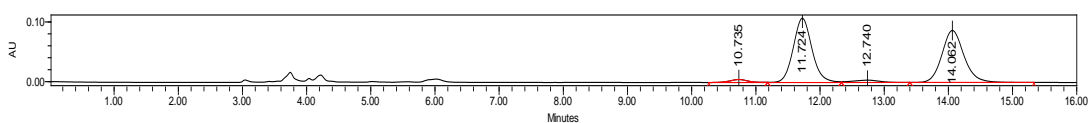

|   | Retention Time | Area    | % Area |
|---|----------------|---------|--------|
| 1 | 10.735         | 96320   | 2.15   |
| 2 | 11.724         | 2184929 | 48.84  |
| 3 | 12.740         | 110046  | 2.46   |
| 4 | 14.062         | 2082214 | 46.55  |

*Chiral HPLC spectrum of cat-2y'*:

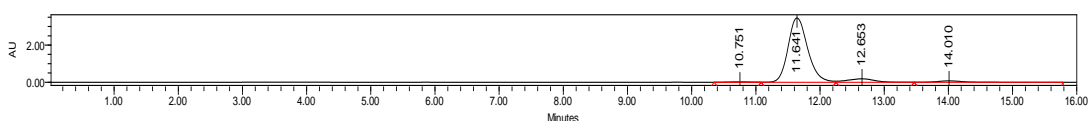

|   | Retention Time | Area     | % Area |
|---|----------------|----------|--------|
| 1 | 10.751         | 354964   | 0.44   |
| 2 | 11.641         | 73359666 | 90.42  |
| 3 | 12.653         | 5423832  | 6.69   |
| 4 | 14.010         | 1990834  | 2.45   |

|   | Retention Time | Area     | % Area |
|---|----------------|----------|--------|
| 1 | 11.641         | 73359666 | 97.59  |
| 2 | 14.010         | 1814793  | 2.41   |

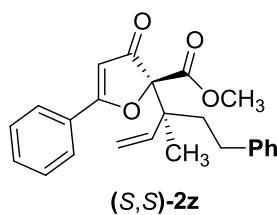

**Methyl-(S)-2-((S)-3-methyl-5-phenylpent-1-en-3-yl)-3-oxo-5-phenyl-2,3-dihydrofuran-2-carboxylate**

0.1 mmol scale reaction;

Clear Oil; 35.3 mg, 94% yield, 98%/94% ee, 5:1 dr;  $[\alpha]_D^{25} = -105.9$  (c 0.77,  $\text{CH}_2\text{Cl}_2$ ); Determined by HPLC analysis [Daicel chiralpak IA, n-hexane/i-PrOH = 95/5, 1.0 mL/min,  $\lambda = 254$  nm,  $t_1 = 11.39$  min,  $t_2 =$

12.02 min,  $t_3 = 14.11$  min,  $t_4 = 17.29$  min];

**$^1\text{H}$  NMR** (400 MHz,  $\text{CDCl}_3$ )  $\delta$  7.85 (d,  $J = 7.6$  Hz, 2H), 7.58 (t,  $J = 7.2$  Hz, 1H), 7.50 (t,  $J = 7.2$  Hz, 2H), 7.25 – 7.22 (m, 2H), 7.14 (t,  $J = 8.8$  Hz, 3H), 6.12 (dd,  $J = 17.2, 10.8$  Hz, 1H), 5.98 (s, 1H), 5.28 (d,  $J = 10.8$  Hz, 1H), 5.18 (d,  $J = 10.8$  Hz, 1H), 3.74 (s, 3H), 2.59 – 2.40 (m, 2H), 2.13 – 1.87 (m, 2H), 1.44 (s, 3H);

**$^{13}\text{C}$  NMR** (101 MHz,  $\text{CDCl}_3$ )  $\delta$  196.4, 184.9, 165.0, 142.3, 139.1, 133.1, 129.0, 128.5, 128.4, 128.2, 127.3, 125.8, 116.7, 101.5, 94.3, 52.9, 48.2, 36.0, 30.4, 16.1;

**HRMS** (ESI) calcd for  $[\text{M}+\text{Na}]^+$ :  $\text{C}_{24}\text{H}_{24}\text{NaO}_4$ , m/z:399.1566, observed: 399.1569.

Chiral HPLC spectrum of racemic 2z:

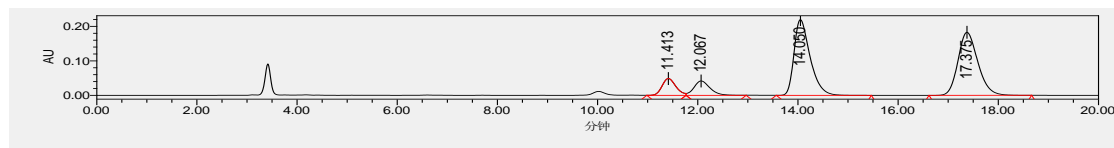

|   | Retention Time | Area    | % Area |
|---|----------------|---------|--------|
| 1 | 11.413         | 926666  | 7.87   |
| 2 | 12.067         | 930932  | 7.91   |
| 3 | 14.050         | 4886496 | 41.52  |
| 4 | 17.375         | 5024051 | 42.69  |

Chiral HPLC spectrum of cat-2z (E-1z as the starting material):

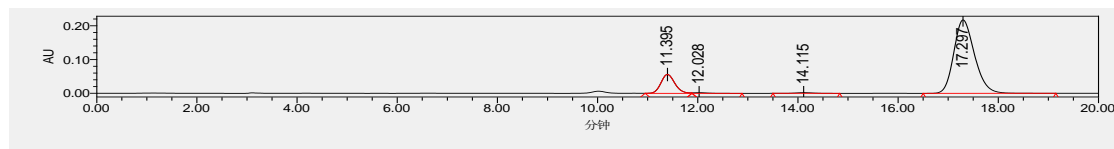

|   | Retention Time | Area    | % Area |
|---|----------------|---------|--------|
| 1 | 11.395         | 1076564 | 14.56  |
| 2 | 12.028         | 38790   | 0.52   |
| 3 | 14.115         | 46882   | 0.63   |
| 4 | 17.297         | 6233078 | 84.28  |

|   | Retention Time | Area    | % Area |
|---|----------------|---------|--------|
| 1 | 14.115         | 42523   | 0.68   |
| 2 | 17.297         | 6233078 | 99.32  |

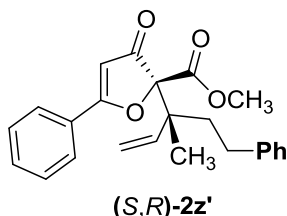

**Methyl-(S)-2-((R)-3-methyl-5-phenylpent-1-en-3-yl)-3-oxo-5-phenyl-2,3-dihydrofuran-2-carboxylate**

0.1 mmol scale reaction;

Clear Oil; 36 mg, 96% yield, 99%/97% ee, 9:1 dr;  $[\alpha]_D^{25} = -177.1$  (c 78,  $\text{CH}_2\text{Cl}_2$ ); Determined by HPLC analysis [Daicel chiralpak IA, n-hexane/i-PrOH = 95/5, 1.0 mL/min,  $\lambda = 254$  nm,  $t_1 = 10.45$  min,  $t_2 = 11.35$  min,  $t_3 = 14.08$  min,  $t_4 = 17.26$  min];

$^1\text{H NMR}$  (400 MHz,  $\text{CDCl}_3$ )  $\delta$  7.85 (d,  $J = 7.2$  Hz, 2H), 7.58 (t,  $J = 7.6$  Hz, 1H), 7.50 (t,  $J = 7.6$  Hz, 2H), 7.25 – 7.21 (m, 2H), 7.20 – 7.05 (m, 3H), 6.08 (dd,  $J = 17.2, 10.8$  Hz, 1H), 5.96 (s, 1H), 5.25 (d,  $J = 10.8$  Hz, 1H), 5.18 (d,  $J = 10.8$  Hz, 1H), 3.74 (s, 3H), 2.60 – 2.42 (m, 2H), 2.09 – 1.89 (m, 2H), 1.49 (s, 3H);

$^{13}\text{C NMR}$  (101 MHz,  $\text{CDCl}_3$ )  $\delta$  196.7, 184.7, 165.0, 142.3, 138.4, 133.1, 129.0, 128.5, 128.4, 128.2, 127.3, 125.9, 116.8, 101.5, 94.4, 52.9, 47.6, 37.0, 30.2, 16.1;

**HRMS** (ESI) calcd for  $[\text{M}+\text{Na}]^+$ :  $\text{C}_{24}\text{H}_{24}\text{NaO}_4$ , m/z: 399.1566, observed: 399.1574.

Chiral HPLC spectrum of racemic 2z:

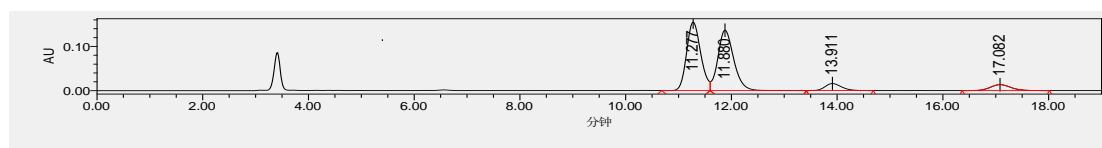

|   | Retention Time | Area    | % Area |
|---|----------------|---------|--------|
| 1 | 11.277         | 2866087 | 44.66  |
| 2 | 11.880         | 2845926 | 44.34  |
| 3 | 13.911         | 342326  | 5.33   |
| 4 | 17.082         | 363713  | 5.67   |

Chiral HPLC spectrum of cat-2z' (Z-1z' as the starting material):

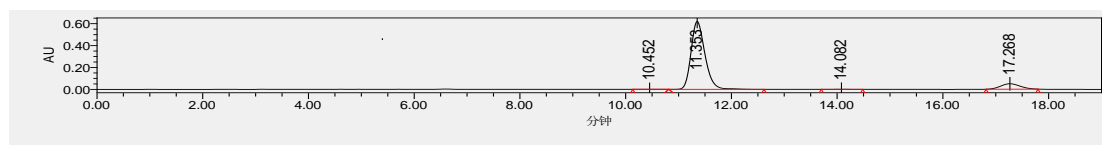

|   | Retention Time | Area     | % Area |
|---|----------------|----------|--------|
| 1 | 10.452         | 14113    | 0.11   |
| 2 | 11.353         | 11313502 | 89.70  |
| 3 | 14.082         | 24239    | 0.19   |
| 4 | 17.268         | 1261262  | 10.00  |

|   | Retention Time | Area     | % Area |
|---|----------------|----------|--------|
| 1 | 10.452         | 14113    | 0.12   |
| 2 | 11.353         | 11313502 | 99.88  |

## General procedure for the gram-scale reaction of **1b** and **1k**

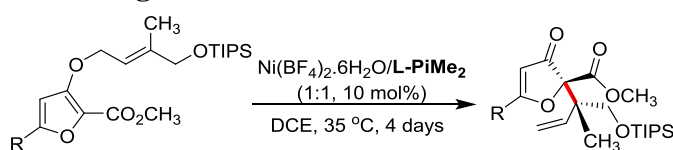

**1b**, R = Ph, 1 mmol, 458 mg  
**1k**, R = 1-Nap, 1 mmol, 508 mg

**2b**, 439 mg, 96% yield,  
**2k**, 484 mg, 95% yield,

In a test tube with a magnetic stirring bar, *N,N'*-dioxide ligand **L-PiMe<sub>2</sub>** (54 mg, 0.1 mmol, 10 mol %), Ni(BF<sub>4</sub>)<sub>2</sub>·6H<sub>2</sub>O (34 mg, 0.1 mmol, 10 mol %) in CH<sub>2</sub>Cl<sub>2</sub> (10.0 mL) were stirred at 35 °C for 1h. After that the solvent become reseda homogeneous solution. Then removing CH<sub>2</sub>Cl<sub>2</sub> and adding substrates **1b** (458 mg, 1.0 mmol) or **1k** (508 mg, 1.0 mmol), DCE (10.0 mL). The mixture was stirred at 35 °C for 4 days. The reaction mixture was detected by TLC. After completion, flash column chromatography was carried out to provide the desired product **2b** (439 mg, 96% yield, 98% ee, 10:1 dr) or **2k** (484 mg, 95% yield, 98% ee, 9:1 dr).

## General procedure for the deprotection/cyclization reaction and analytical, spectral characterization data of the products

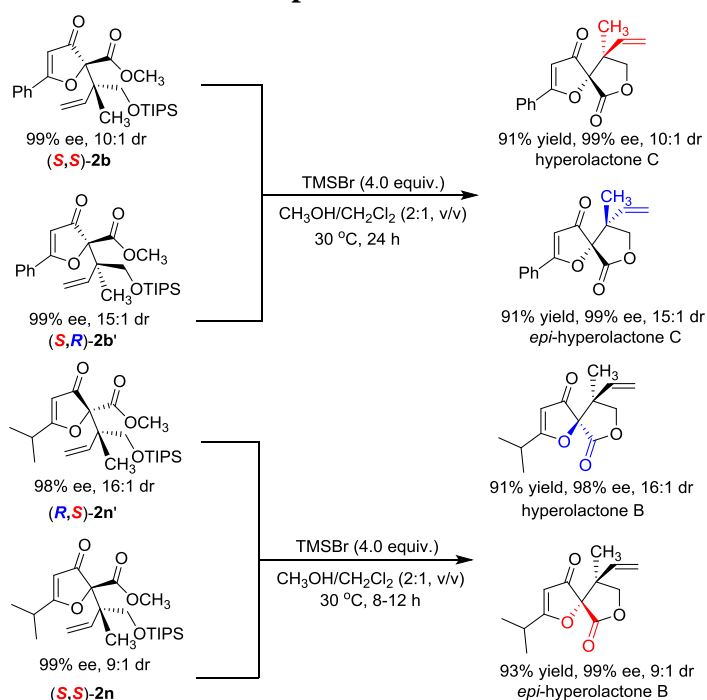

To a solution of the compound **2** (0.1 mmol) in CH<sub>3</sub>OH/CH<sub>2</sub>Cl<sub>2</sub> (1.5 mL, 2:1, v/v), TMSBr (0.4 mmol, 4.0 equiv.) was added, the reaction mixture was stirred at 30 °C for 8-24 h. Then the reaction was quenched by the addition of a saturated aq. sodium bicarbonate solution (1 mL) and diluted with water (1 mL). The product was extracted with ethyl acetate (3×10 mL). The combined organic extracts were washed with brine (20 mL) and concentrated in vacuo. Flash chromatography (hexane/ethyl acetate, 10:1) afforded the desired product.

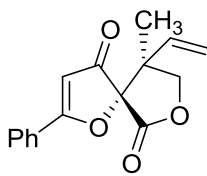

**(5S,9S)-9-methyl-2-phenyl-9-vinyl-1,7-dioxaspiro[4.4]non-2-ene-4,6-dione**

; White solid; 24.5 mg, 91% yield, 99% ee, 10:1 dr;  $[\alpha]_D^{25} = -280.7$  (c 0.33,  $\text{CH}_2\text{Cl}_2$ );  $[\alpha]_D^{25} = -264.5$  (c 0.11,  $\text{CHCl}_3$ ), ref. { Crockett, S. L., Schüthly, W., Belaj, F., Khan, I. A. Hyperolactone C. *Acta Crystallogr. Sect. E* **60**, o2174-o2176 (2004),  $[\alpha]_D = -270.7$  (c 0.11,  $\text{CHCl}_3$ ); Determined by HPLC analysis [Daicel chiralpak Lux 5u Cellulose-2, n-hexane/i-PrOH = 90/10, 1.0 mL/min,  $\lambda = 254$  nm,  $t_1 = 22.06$  min,  $t_2 = 29.48$  min,  $t_3 = 31.55$  min,  $t_4 = 38.28$  min];

$^1\text{H NMR}$  (400 MHz,  $\text{CDCl}_3$ )  $\delta$  7.85 (d,  $J = 7.6$  Hz, 2H), 7.61 (t,  $J = 7.2$  Hz, 1H), 7.52 (t,  $J = 7.6$  Hz, 2H), 6.05 – 5.93 (m, 2H), 5.28 – 5.23 (m, 2H), 4.97 (d,  $J = 8.4$  Hz, 1H), 4.11 (d,  $J = 8.8$  Hz, 1H), 1.53 (s, 3H);

$^{13}\text{C NMR}$  (101 MHz,  $\text{CDCl}_3$ )  $\delta$  196.6, 187.3, 168.1, 134.2, 133.6, 129.1, 127.7, 127.5, 119.1, 100.3, 93.1, 74.1, 48.9, 19.6;

**HRMS** (ESI) calcd for  $[\text{M}+\text{H}]^+$ :  $\text{C}_{16}\text{H}_{15}\text{O}_4$ , m/z: 271.0964, observed:271.0965.

*Chiral HPLC spectrum of racemic hyperolactone C*

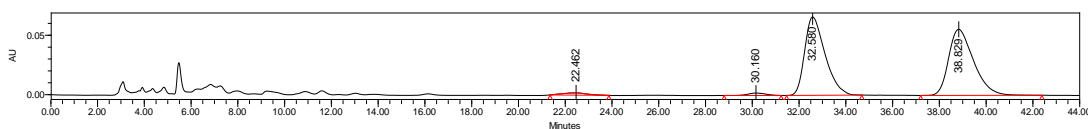

|   | Retention Time | Area    | % Area |
|---|----------------|---------|--------|
| 1 | 22.462         | 139321  | 1.67   |
| 2 | 30.160         | 107123  | 1.28   |
| 3 | 32.580         | 3989896 | 47.83  |
| 4 | 38.829         | 4105386 | 49.22  |

*Chiral HPLC spectrum of hyperolactone C (major):*

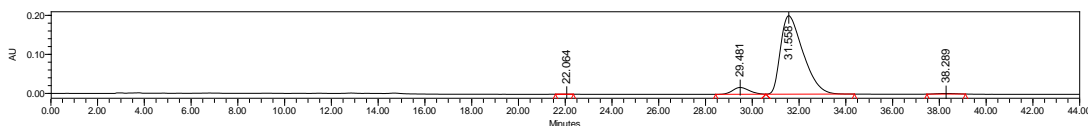

|   | Retention Time | Area     | % Area |
|---|----------------|----------|--------|
| 1 | 22.064         | 780      | 0.01   |
| 2 | 29.481         | 866937   | 6.03   |
| 3 | 31.558         | 13433316 | 93.38  |
| 4 | 38.289         | 84762    | 0.59   |

|   | Retention Time | Area     | % Area |
|---|----------------|----------|--------|
| 1 | 31.558         | 13433316 | 99.37  |
| 2 | 38.289         | 84762    | 0.63   |

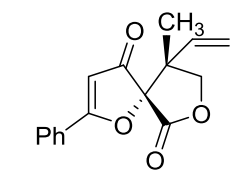

*epi-hyperolactone C*

**(5S,9R)-9-methyl-2-phenyl-9-vinyl-1,7-dioxaspiro[4.4]non-2-ene-4,6-dione;**

White solid; 24.5 mg, 91% yield, 99% ee, 15:1 dr;  $[\alpha]_D^{25} = -264.8$  (c 0.13,  $\text{CH}_2\text{Cl}_2$ ); Determined by HPLC analysis [Daicel chiralpak Lux 5u Cellulose-2, n-hexane/i-PrOH = 90/10, 1.0 mL/min,  $\lambda = 254$  nm,  $t_1 = 22.33$  min,  $t_2 = 29.27$  min,  $t_3 = 31.95$  min,  $t_4 = 38.15$  min];

$^1\text{H NMR}$  (400 MHz,  $\text{CDCl}_3$ )  $\delta$  7.85 (d,  $J = 8.4$  Hz, 2H), 7.61 (t,  $J = 6.8$  Hz,



1H), 7.53 – 7.49 (m, 2H), 6.14 – 5.99 (m, 2H), 5.46 – 5.26 (m, 2H), 4.78 (d,  $J = 8.4$  Hz, 1H), 4.43 – 4.34 (m, 1H), 1.30 (d,  $J = 1.2$  Hz, 3H);

$^{13}\text{C}$  NMR (101 MHz,  $\text{CDCl}_3$ )  $\delta$  196.6, 187.5, 168.2, 136.8, 133.7, 129.1, 127.7, 127.5, 116.3, 100.4, 92.3, 73.3, 48.9, 15.5;

HRMS (ESI) calcd for  $[\text{M}+\text{H}]^+$ :  $\text{C}_{16}\text{H}_{15}\text{O}_4$ ,  $m/z$ : 271.0964, observed: 271.0967.

Chiral HPLC spectrum of *epi*-hyperolactone C (major):

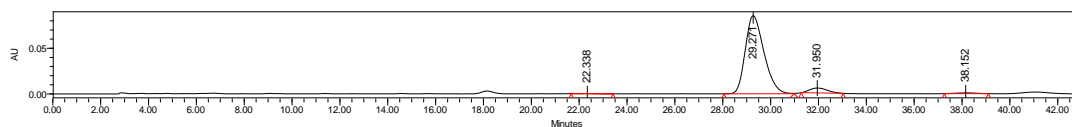

|   | Retention Time | Area    | % Area |
|---|----------------|---------|--------|
| 1 | 22.338         | 5241    | 0.11   |
| 2 | 29.271         | 4629592 | 93.56  |
| 3 | 31.950         | 281392  | 5.69   |
| 4 | 38.152         | 32224   | 0.65   |

|   | Retention Time | Area    | % Area |
|---|----------------|---------|--------|
| 1 | 22.338         | 5241    | 0.11   |
| 2 | 29.271         | 4629592 | 99.89  |

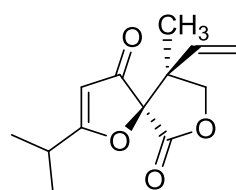

hyperolactone B

**(5*R*,9*S*)-2-isopropyl-9-methyl-9-vinyl-1,7-dioxaspiro[4.4]non-2-ene-4,6-dione;**

White solid; 21.4 mg, 91% yield, 98% ee, 16:1 dr;  $[\alpha]_{\text{D}}^{25} = +309$  (c 0.5,  $\text{CH}_2\text{Cl}_2$ );  $[\alpha]_{\text{D}}^{25} = +388.8$  (c 0.018, EtOH), ref. { Aramaki, Y., Chiba, K., Tada, M. Spirolactones, Hyperolactone A-D from *Hypericum Chinense*. *Phytochemistry* **38**, 1419-1421 (1995),  $[\alpha]_{\text{D}} = +411.1$  (c 0.018, EtOH)}; Determined by HPLC analysis [Daicel chiralpak Lux 5u Cellulose-2, n-hexane/i-PrOH = 90/10, 1.0

mL/min,  $\lambda = 254$  nm,  $t_1 = 16.45$  min,  $t_2 = 19.47$  min,  $t_3 = 32.47$  min,  $t_4 = 34.51$  min];

$^1\text{H}$  NMR (400 MHz,  $\text{CDCl}_3$ )  $\delta$  6.01 – 5.87 (m, 1H), 5.44 (d,  $J = 0.4$  Hz, 1H), 5.33 – 5.24 (m, 2H), 4.71 (d,  $J = 8.4$  Hz, 1H), 4.32 (d,  $J = 8.4$  Hz, 1H), 2.92 – 2.79 (m, 1H), 1.29 (dd,  $J = 6.8, 2.4$  Hz, 6H), 1.23 (s, 3H);

$^{13}\text{C}$  NMR (101 MHz,  $\text{CDCl}_3$ )  $\delta$  201.3, 197.5, 168.1, 136.7, 116.0, 101.2, 91.8, 73.2, 48.4, 30.4, 19.7, 19.4, 15.4;

HRMS (ESI) calcd for  $[\text{M}+\text{H}]^+$ :  $\text{C}_{13}\text{H}_{16}\text{O}_4$ ,  $m/z$ : 237.1121, observed: 237.1122.

Chiral HPLC spectrum of racemic hyperolactone B

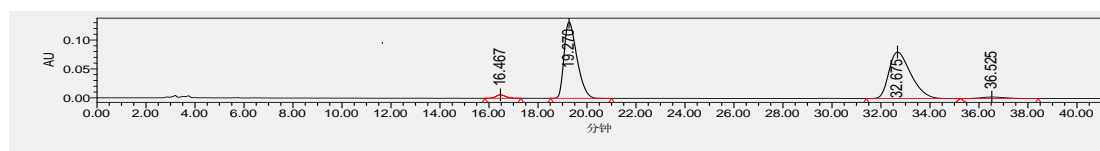

|   | Retention Time | Area    | % Area |
|---|----------------|---------|--------|
| 1 | 16.467         | 163066  | 1.61   |
| 2 | 19.270         | 4823824 | 47.57  |
| 3 | 32.675         | 4981888 | 49.13  |
| 4 | 36.525         | 170963  | 1.69   |

Chiral HPLC spectrum of hyperolactone B (major)

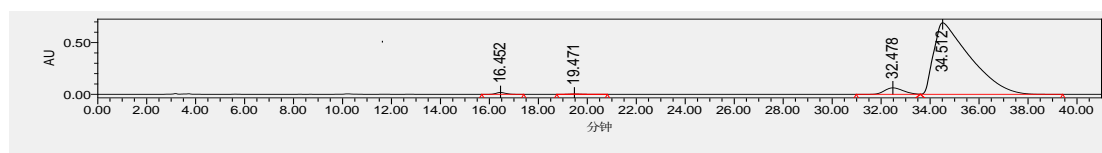

|   | Retention Time | Area     | % Area |
|---|----------------|----------|--------|
| 1 | 16.452         | 474297   | 0.63   |
| 2 | 19.471         | 93521    | 0.12   |
| 3 | 32.478         | 3316174  | 4.41   |
| 4 | 34.512         | 71240802 | 94.83  |

|   | Retention Time | Area     | % Area |
|---|----------------|----------|--------|
| 1 | 16.452         | 461832   | 0.64   |
| 2 | 34.512         | 71240802 | 99.36  |

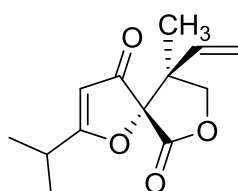

**(5S,9S)-2-isopropyl-9-methyl-9-vinyl-1,7-dioxaspiro[4.4]non-2-ene-4,6-dione;**

White solid; 22 mg, 93% yield, 99%/92% ee, 9:1 dr;  $[\alpha]_D^{25} = -297.3$  (c 0.30,  $\text{CH}_2\text{Cl}_2$ ); Determined by HPLC analysis [Daicel chiralpak Lux 5u Cellulose-2, n-hexane/i-PrOH = 90/10, 1.0 mL/min,  $\lambda = 254$  nm,  $t_1 = 16.40$

*epi*-hyperolactone B min,  $t_2 = 18.92$  min,  $t_3 = 32.92$  min,  $t_4 = 36.60$  min];

$^1\text{H NMR}$  (400 MHz,  $\text{CDCl}_3$ )  $\delta$  5.92 (dd,  $J = 17.2, 10.8$  Hz, 1H), 5.41 – 5.33 (m, 1H), 5.32 – 5.20 (m, 2H), 4.89 (d,  $J = 8.4$  Hz, 1H), 4.05 (d,  $J = 8.5$  Hz, 1H), 2.94 – 2.76 (m, 1H), 1.41 (s, 3H), 1.28 (dd,  $J = 6.8, 2.8$  Hz, 6H);

$^{13}\text{C NMR}$  (101 MHz,  $\text{CDCl}_3$ )  $\delta$  201.1, 197.4, 168.1, 134.3, 118.9, 101.1, 92.5, 74.0, 48.4, 30.4, 19.7, 19.3 (2C);

**HRMS** (ESI) calcd for  $[\text{M}+\text{H}]^+$ :  $\text{C}_{13}\text{H}_{16}\text{O}_4$ ,  $m/z$ : 237.1121, observed: 237.1122.

Chiral HPLC spectrum of *epi*-hyperolactone B (major):

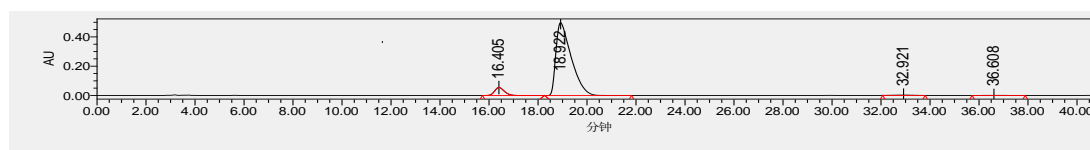

|   | Retention Time | Area     | % Area |
|---|----------------|----------|--------|
| 1 | 16.405         | 1491965  | 6.42   |
| 2 | 18.922         | 21563290 | 92.84  |
| 3 | 32.921         | 116487   | 0.50   |
| 4 | 36.608         | 54273    | 0.23   |

|   | Retention Time | Area     | % Area |
|---|----------------|----------|--------|
| 1 | 18.922         | 21563290 | 99.46  |
| 2 | 32.921         | 116487   | 0.54   |

## Supplementary References

1. Aramaki, Y., Chiba, K., Tada, M. Spiro-lactones, Hyperolactone A-D from *Hypericum chinense*. Spiro-lactones, hyperolactone A-D from *Hypericum chinense*. *Phytochemistry* **38**, 1419 (1995).
2. Wasserman, H. H., Lee, G. M. The chemistry of vicinal tricarbonyls. A new synthesis of substituted furans. *Tetrahedron Letters* **35**, 9783 (1994).
3. Du, C., Li, L. Q., Li, Y., Xie, Z. X. Construction of Two Vicinal Quaternary Carbons by Asymmetric Allylic Alkylation: Total Synthesis of Hyperolactone C and (–)-Biyouyanagin A. *Angew. Chem. Int. Ed.* **48**, 7853 (2009).
4. Hecht, S., Amslinger, S., Jauch, J., Kis, K., Trentinaglia, V., Adam, P., Eisenreich, W., Bacher, A., Rohdich, F. Studies on the non-mevalonate isoprenoid biosynthetic pathway. Simple methods for preparation of isotope-labeled (*E*)-1-hydroxy-2-methylbut-2-enyl 4-diphosphate. *Tetrahedron Letters* **43**, 8929 (2002).
5. Evans, D. A., Glorius, F., Burch, J. D. Complex Aldol Reactions for the Construction of Dense Polyol Stereoarrays: Synthesis of the C33–C36 Region of Aflastatin A. *Org. Lett.*, **7**, 3331 (2005)
6. Li, H., Yoo, J. C., Hong, J. H. *Nucleosides, Nucleotides and Nucleic Acids*, Synthesis and anti-HCV Evaluation of 4'-( $\alpha$ )-ethyl and 2'-( $\beta$ )-methyl-carbodiene Analogues. **28**, 809 (2009)
7. Broadley, K. J., Buffat, M. G. P., Burnell, E., Davies, R. H., Moreau, X., Snee, S., and Thomas, E. J. Stereoselective synthesis of oxazolidinonyl-fused piperidines of interest as selective muscarinic (M1) receptor agonists: a novel M1 allosteric modulator. *Org. Biomol. Chem.***14**, 2057 (2016).
